# Supplementary material for: In-Silico Analysis of pH-Dependent Liquid-Liquid Phase Separation in Intrinsically Disordered Proteins
Source: Biomolecules. 2022 Jul 12;12(7):974. doi: 10.3390/biom12070974 (PMC9313257; doi:10.3390/biom12070974)
Supplement: Supplementary file 1 [file biomolecules-12-00974-s001.zip › Table S1 data_LLPSDRs_pH.xlsx]

## Sheet: PhaSepDB
UniProt ID	Protein name	PSID	PS_start	PS_end	Length_PS	Buffer LLPS (from LLPSDB)	Organism	MLO	PMID	IUPRED_start	IUPRED_end	Length_disorder	pH of maximum solubility	Maximum solubility	10% maximum	pH of minimum solubility	Minimum solubility	10% minimum	Solubility at buffer LLPS	Solubility at pH 7	pI	Diff max-min	Transition prediction	Folding state	Transition pH	pH of maximum DispH	Maximum DispH	pH of minimum DispH	Minimum DispH	DispH score at pH 7	Diff max-min	Folding state at buffer LLPS	DispHScore at pH max solub	DispHscore at pH min solub
A0A0B4K7A6	Modifier of mdg4; isoform AD (EC 3.1.3.4)	psother65	1	510	510	_	Drosophila melanogaster	Nucleolus	28115706	114	277	164	7.6	59.26	[6.6-8.5]; 59.0	4	51.46	[4.0-4.5]; 51.78	_	59.01	9.6	7.8	False	Folded	None	4.8	0.194	7.3	0.183	0.183042	0.011	_	0.182958	0.185194
A0A0B4K7A6	Modifier of mdg4; isoform AD (EC 3.1.3.4)	psother65	1	510	510	_	Drosophila melanogaster	Nucleolus	28115706	279	410	132	8.9	105.32	[7.4-9.0]; 103.6	4	52.33	[4.0-4.2]; 54.12	_	97.63	3.7	52.99	True	F->U	5.85	4	0.195	9	-0.088	-0.0566345	0.283	_	-0.0880731	0.195028
A0A0F7DHA4	Cyclic GMP-AMP synthase	psother541	1	523	523	_	Leontocebus fuscicollis	_	33606975	1	148	148	7	86.1	[6.3-7.7]; 85.76	4	75.26	[4.0-4.5]; 75.7	_	86.1	11.4	10.84	False	Folded	None	9	0.08	4	0.047	0.0505491	0.033	_	0.0505491	0.0473483
A0A2U8QNT7	LEA6	psself258	1	257	257	_	Artemia franciscana	_	33077592	43	78	36	9	70.39	[8.0-9.0]; 68.63	4	18.05	[4.0-4.4]; 20.36	_	56.63	3.6	52.34	False	Folded	None	4	0.317	9	0.076	0.121502	0.241	_	0.0760682	0.316524
A0A2U8QNT7	LEA6	psself258	1	257	257	_	Artemia franciscana	_	33077592	128	163	36	7	31.77	[6.3-8.0]; 31.2	4	15.5	[4.0-4.4]; 16.19	_	31.77	4.6	16.27	False	Folded	None	4.7	0.336	7.2	0.236	0.236901	0.1	_	0.236901	0.308663
A0A2U8QNT7	LEA6	psself258	1	257	257	_	Artemia franciscana	_	33077592	176	219	44	8.1	37.01	[6.9-8.9]; 36.52	4	22.39	[4.0-4.3]; 22.98	_	35.92	7	14.62	False	Folded	None	4.7	0.327	8.4	0.289	0.296847	0.038	_	0.289661	0.316529
A0A2U8QNT7	LEA6	psself258	1	257	257	_	Artemia franciscana	_	33077592	224	256	33	8.1	52.05	[6.9-9.0]; 51.06	4	21.78	[4.0-4.4]; 23.07	_	49.52	4.6	30.27	False	Folded	None	4.6	0.299	8.2	0.174	0.184376	0.125	_	0.174153	0.276551
A0A3Q7I916	ALOG domain-containing protein	psself337	1	208	208	_	Solanum lycopersicum	Transcriptional condensate	33633378	1	64	64	8.6	92.26	[7.8-9.0]; 92.12	4	87.5	[4.0-4.2]; 87.71	_	91.14	6.6	4.76	False	Folded	None	6.1	0.09	4	0.009	0.0582626	0.081	_	0.0447764	0.00857015
A0A3Q7I916	ALOG domain-containing protein	psself337	1	208	208	_	Solanum lycopersicum	Transcriptional condensate	33633378	177	208	32	5	120.81	[4.0-6.1]; 119.94	9	75.49	[8.8-9.0]; 77.24	_	106.2	11.4	45.32	False	Unfolded	None	9	-0.035	4	-0.257	-0.158872	0.222	_	-0.243074	-0.0352631
A0A6I8S983	Cytoplasmic polyadenylation element-binding protein 4	psself132	1	728	728	_	Xenopus tropicalis	_	30826453;27802129	16	50	35	4	36.16	[4.0-5.2]; 35.46	9	11.03	[8.4-9.0]; 12.23	_	19.19	13.6	25.13	False	Folded	None	9	0.314	4	0.091	0.274455	0.223	_	0.0909195	0.314433
A0A6I8S983	Cytoplasmic polyadenylation element-binding protein 4	psself132	1	728	728	_	Xenopus tropicalis	_	30826453;27802129	54	140	87	7	90.6	[6.2-8.0]; 89.66	4	62.72	[4.0-4.4]; 63.73	_	90.6	4.3	27.88	False	Non-confident transition	None	4.3	0.152	7.1	-0.013	-0.0133186	0.165	_	-0.0133186	0.13656
A0A6I8S983	Cytoplasmic polyadenylation element-binding protein 4	psself132	1	728	728	_	Xenopus tropicalis	_	30826453;27802129	144	165	22	9	66.43	[7.9-9.0]; 65.43	4	43.3	[4.0-4.4]; 44.29	_	61.15	1.8	23.13	False	Folded	None	4	0.219	9	0.082	0.106235	0.137	_	0.0822847	0.219137
A0A6I8S983	Cytoplasmic polyadenylation element-binding protein 4	psself132	1	728	728	_	Xenopus tropicalis	_	30826453;27802129	217	337	121	4	64.01	[4.0-5.3]; 63.5	9	42.52	[8.5-9.0]; 43.57	_	49.3	12.5	21.49	False	Folded	None	9	0.186	4	0.02	0.154213	0.166	_	0.0204943	0.186188
A0JLT2	Mediator of RNA polymerase II transcription subunit 19 (Lung cancer metastasis-related protein 1) (Mediator complex subunit 19)	psother590	1	244	244	_	Homo sapiens	_	33771451;33333019	3	56	54	8.7	-42.66	[7.4-9.0]; -42.87	4	-49.69	[4.0-4.2]; -49.43	_	-43.72	3.9	7.03	False	Folded	None	4	0.587	7.9	0.559	0.559484	0.028	_	0.55984	0.586643
A0JLT2	Mediator of RNA polymerase II transcription subunit 19 (Lung cancer metastasis-related protein 1) (Mediator complex subunit 19)	psother590	1	244	244	_	Homo sapiens	_	33771451;33333019	107	143	37	8.8	17.84	[7.7-9.0]; 17.16	4	-6.52	[4.0-4.4]; -5.43	_	12.96	4.4	24.36	False	Folded	None	4.3	0.396	8.8	0.261	0.280833	0.135	_	0.260879	0.38808
A0JLT2	Mediator of RNA polymerase II transcription subunit 19 (Lung cancer metastasis-related protein 1) (Mediator complex subunit 19)	psother590	1	244	244	_	Homo sapiens	_	33771451;33333019	147	244	98	5.4	159.11	[4.0-6.2]; 156.99	9	107.58	[8.8-9.0]; 109.81	_	143.66	10.5	51.53	False	Unfolded	None	9	-0.137	4	-0.438	-0.294253	0.301	_	-0.404159	-0.137458
A0QSY1	ABC transporter; ATP-binding protein	psself154	1	340	340	_	Mycolicibacterium smegmatis	_	31366629	80	266	187	5.6	32.44	[4.7-6.2]; 32.29	9	28.6	[8.9-9.0]; 28.78	_	31.53	10.7	3.84	False	Folded	None	9	0.278	4	0.248	0.265748	0.03	_	0.255265	0.277772
A0QSY1	ABC transporter; ATP-binding protein	psself154	1	340	340	_	Mycolicibacterium smegmatis	_	31366629	281	308	28	8.3	48.92	[7.3-9.0]; 48.25	4	27.86	[4.0-4.4]; 28.76	_	46.01	10.5	21.06	False	Folded	None	5.1	0.233	4	0.209	0.22767	0.024	_	0.220398	0.20939
A2AUM9	Centrosomal protein of 152 kDa (Cep152)	psother561	1	1736	1736	_	Mus musculus	_	33658185	3	78	76	8.7	133.76	[7.3-9.0]; 131.58	4	59.33	[4.0-4.3]; 62.75	_	123.87	4	74.43	True	F->U	4.95	4	0.189	8.8	-0.278	-0.231906	0.467	_	-0.277819	0.188905
A2AUM9	Centrosomal protein of 152 kDa (Cep152)	psother561	1	1736	1736	_	Mus musculus	_	33658185	86	140	55	8.3	103.94	[7.0-9.0]; 102.93	4	64.99	[4.0-4.4]; 66.39	_	100.58	4.4	38.95	True	F->U	6.05	4.5	0.147	8.3	-0.061	-0.0450559	0.208	_	-0.0606281	0.119228
A2AUM9	Centrosomal protein of 152 kDa (Cep152)	psother561	1	1736	1736	_	Mus musculus	_	33658185	513	533	21	8.4	138.62	[7.0-9.0]; 137.08	4	78.28	[4.0-4.3]; 80.87	_	133.21	4	60.34	True	F->U	4.65	4	0.124	8.3	-0.209	-0.193747	0.333	_	-0.208494	0.124138
A2AUM9	Centrosomal protein of 152 kDa (Cep152)	psother561	1	1736	1736	_	Mus musculus	_	33658185	565	597	33	7	105.29	[6.2-8.1]; 104.15	4	73.89	[4.0-4.3]; 75.19	_	105.29	4.4	31.4	True	F->U	5.45	4.4	0.106	7	-0.05	-0.049603	0.156	_	-0.049603	0.081102
A2AUM9	Centrosomal protein of 152 kDa (Cep152)	psother561	1	1736	1736	_	Mus musculus	_	33658185	1409	1437	29	6.9	94.99	[6.2-7.7]; 94.44	4	78.63	[4.0-4.3]; 79.29	_	94.96	6.6	16.36	False	Folded	None	6	0.082	4	0.019	0.0489985	0.063	_	0.0503101	0.0194369
A2AUM9	Centrosomal protein of 152 kDa (Cep152)	psother561	1	1736	1736	_	Mus musculus	_	33658185	1442	1480	39	6.5	115.9	[5.8-7.2]; 115.35	9	100.03	[8.9-9.0]; 100.76	_	115.23	12	15.87	False	Unfolded	None	9	-0.103	4	-0.211	-0.168167	0.108	_	-0.175184	-0.103248
A2AUM9	Centrosomal protein of 152 kDa (Cep152)	psother561	1	1736	1736	_	Mus musculus	_	33658185	1543	1613	71	7.4	81.47	[6.4-8.4]; 80.92	4	64.6	[4.0-4.3]; 65.17	_	81.29	6.1	16.87	False	Folded	None	4.9	0.146	7.4	0.103	0.10456	0.043	_	0.103377	0.123701
A2AUM9	Centrosomal protein of 152 kDa (Cep152)	psother561	1	1736	1736	_	Mus musculus	_	33658185	1656	1701	46	5.7	76.73	[5.1-6.3]; 76.21	9	61.94	[8.9-9.0]; 62.33	_	72.44	9.4	14.79	False	Folded	None	9	0.153	4	0.014	0.100882	0.139	_	0.0450434	0.153338
A2AUM9	Centrosomal protein of 152 kDa (Cep152)	psother561	1	1736	1736	_	Mus musculus	_	33658185	1714	1736	23	7.5	18.77	[6.4-8.8]; 18.22	4	-0.17	[4.0-4.2]; 0.43	_	18.51	4.3	18.94	False	Folded	None	4.2	0.381	7.2	0.274	0.274698	0.107	_	0.274843	0.376504
A7MCY6	TANK-binding kinase 1-binding protein 1 (TBK1-binding protein 1)	psother239	1	615	615	_	Homo sapiens	SINT-speckle	31442668	176	198	23	9	5.61	[8.3-9.0]; 3.56	4	-42.07	[4.0-4.5]; -39.74	_	-11.45	1.8	47.68	False	Folded	None	4	0.474	9	0.262	0.324373	0.212	_	0.262365	0.473907
A7MCY6	TANK-binding kinase 1-binding protein 1 (TBK1-binding protein 1)	psother239	1	615	615	_	Homo sapiens	SINT-speckle	31442668	209	253	45	8.2	111.24	[6.9-9.0]; 110.17	4	71.41	[4.0-4.5]; 73.03	_	108.25	4.4	39.83	True	F->U	5.55	4.5	0.125	8.2	-0.102	-0.0879642	0.227	_	-0.102195	0.0912206
A7MCY6	TANK-binding kinase 1-binding protein 1 (TBK1-binding protein 1)	psother239	1	615	615	_	Homo sapiens	SINT-speckle	31442668	256	287	32	7.3	114.22	[6.4-8.3]; 113.43	4	90.46	[4.0-4.3]; 91.42	_	114.03	10.1	23.76	False	Non-confident transition	None	4.9	0.008	7.5	-0.038	-0.0365231	0.046	_	-0.0380933	-0.0176309
A7MCY6	TANK-binding kinase 1-binding protein 1 (TBK1-binding protein 1)	psother239	1	615	615	_	Homo sapiens	SINT-speckle	31442668	316	486	171	5.9	51.36	[5.0-6.9]; 51.08	9	44.2	[8.9-9.0]; 44.56	_	50.54	11.8	7.16	False	Folded	None	9	0.185	4	0.127	0.159219	0.058	_	0.147102	0.18486
A8IGD9	Low-CO2-inducible protein	psother87	1	235	235	_	Chlamydomonas reinhardtii	_	28938114	26	235	210	6.6	74.42	[5.7-7.4]; 74.15	9	66.51	[9.0-9.0]; 66.51	_	74.23	12.8	7.91	False	Folded	None	9	0.092	4	0.06	0.0630578	0.032	_	0.0622816	0.0918773
B3DL84	Serine/threonine-protein kinase PLK4 (EC 2.7.11.21) (Polo-like kinase 4) (PLK-4) (Serine/threonine-protein kinase Sak)	psself247	1	946	946	_	Xenopus tropicalis	Centrosome;Pericentriolar matrix	32860741;30237222	332	393	62	7.7	128.01	[6.5-8.4]; 127.6	4	114.9	[4.0-4.3]; 115.47	_	127.63	10.1	13.11	False	Unfolded	None	9	-0.089	4	-0.148	-0.10947	0.059	_	-0.108341	-0.147511
B3DL84	Serine/threonine-protein kinase PLK4 (EC 2.7.11.21) (Polo-like kinase 4) (PLK-4) (Serine/threonine-protein kinase Sak)	psself247	1	946	946	_	Xenopus tropicalis	Centrosome;Pericentriolar matrix	32860741;30237222	420	459	40	7	53.2	[6.2-7.9]; 52.52	4	33.56	[4.0-4.3]; 34.39	_	53.2	6.1	19.64	False	Folded	None	5	0.21	7.1	0.16	0.1601	0.05	_	0.1601	0.180081
B3DL84	Serine/threonine-protein kinase PLK4 (EC 2.7.11.21) (Polo-like kinase 4) (PLK-4) (Serine/threonine-protein kinase Sak)	psself247	1	946	946	_	Xenopus tropicalis	Centrosome;Pericentriolar matrix	32860741;30237222	484	506	23	9	61.03	[7.9-9.0]; 60.34	4	39.16	[4.0-4.3]; 40.06	_	55.86	3.9	21.87	False	Folded	None	4	0.236	8.9	0.14	0.153443	0.096	_	0.139584	0.236317
B3DL84	Serine/threonine-protein kinase PLK4 (EC 2.7.11.21) (Polo-like kinase 4) (PLK-4) (Serine/threonine-protein kinase Sak)	psself247	1	946	946	_	Xenopus tropicalis	Centrosome;Pericentriolar matrix	32860741;30237222	789	824	36	8	121.27	[6.9-8.8]; 120.53	4	98.07	[4.0-4.3]; 98.89	_	119.49	8.8	23.2	False	Unfolded	None	4.9	-0.033	4	-0.058	-0.0516539	0.025	_	-0.0563828	-0.0575082
C3XWA2	Nuclear pore complex protein Nup96 (Nuclear pore complex protein Nup98) (Nuclear pore complex protein Nup98-Nup96) (Nucleoporin Nup96) (Nucleoporin Nup98)	psself26	1	478	478	_	Branchiostoma floridae	Nuclear pore complex	25562883;29424691	320	349	30	4.1	18.19	[4.0-5.9]; 17.94	9	8.61	[8.7-9.0]; 9.07	_	14.66	12.2	9.58	False	Folded	None	9	0.353	4	0.316	0.329215	0.037	_	0.316001	0.352718
D0PV95	ATP-dependent RNA helicase laf-1 (EC 3.6.4.13) (DEAD-box RNA helicase laf-1)	psself338	1	712	712	pH 7.4	Caenorhabditis elegans	_	33645620	1	203	203	8.5	131.76	[7.7-9.0]; 130.87	4	102.85	[4.0-4.7]; 103.79	Middle	124.32	9.6	28.91	False	Non-confident transition	None	4.7	0.005	8.5	-0.077	-0.0501957	0.082	Unfolded	-0.0771217	-0.00879911
D0PV95	ATP-dependent RNA helicase laf-1 (EC 3.6.4.13) (DEAD-box RNA helicase laf-1)	psself338	1	712	712	pH 7.4	Caenorhabditis elegans	_	33645620	621	708	88	8.2	92.93	[7.5-8.7]; 92.6	4	83.13	[4.0-4.5]; 83.58	Middle	90.83	12.4	9.8	False	Folded	None	4.8	0.027	8.1	0.016	0.0208036	0.011	Folded	0.0155958	0.0205927
D3KYQ3	Macronuclear nucleoporin MacNup98A	psself27	1	666	666	_	Tetrahymena thermophila	Nuclear pore complex	25562883;29424691	4	218	215	7.4	2.68	[4.0-7.7]; 2.68	9	2.5	[9.0-9.0]; 2.5	_	2.68	14.5	0.18	False	Folded	None	9	0.395	4	0.395	0.394657	0	_	0.394676	0.395435
D3KYQ3	Macronuclear nucleoporin MacNup98A	psself27	1	666	666	_	Tetrahymena thermophila	Nuclear pore complex	25562883;29424691	226	256	31	9	-18.36	[4.0-4.0]; -18.36	9	-18.36	[4.0-4.0]; -18.36	_	-18.36	7	0	False	Folded	None	4	0.452	4	0.452	0.452442	0	_	0.452442	0.452442
D3KYQ3	Macronuclear nucleoporin MacNup98A	psself27	1	666	666	_	Tetrahymena thermophila	Nuclear pore complex	25562883;29424691	459	502	44	9	-9.23	[4.0-4.0]; -9.23	9	-9.23	[4.0-4.0]; -9.23	_	-9.23	7	0	False	Folded	None	4	0.439	4	0.439	0.438781	0	_	0.438781	0.438781
D3KYQ3	Macronuclear nucleoporin MacNup98A	psself27	1	666	666	_	Tetrahymena thermophila	Nuclear pore complex	25562883;29424691	508	544	37	9	4.33	[4.0-4.0]; 4.33	9	4.33	[4.0-4.0]; 4.33	_	4.33	7	0	False	Folded	None	4	0.389	4	0.389	0.38921	0	_	0.38921	0.38921
D3KYQ3	Macronuclear nucleoporin MacNup98A	psself27	1	666	666	_	Tetrahymena thermophila	Nuclear pore complex	25562883;29424691	550	605	56	9	-5.33	[4.0-4.0]; -5.33	9	-5.33	[4.0-4.0]; -5.33	_	-5.33	7	0	False	Folded	None	4	0.423	4	0.423	0.422795	0	_	0.422795	0.422795
D3KYQ3	Macronuclear nucleoporin MacNup98A	psself27	1	666	666	_	Tetrahymena thermophila	Nuclear pore complex	25562883;29424691	623	659	37	9	-1.1	[4.0-4.0]; -1.1	9	-1.1	[4.0-4.0]; -1.1	_	-1.1	7	0	False	Folded	None	4	0.395	4	0.395	0.394583	0	_	0.394583	0.394583
D3YXK2	Scaffold attachment factor B1 (SAF-B1)	psself196	1	937	937	_	Mus musculus	_	32313950;31677973	1	34	34	8.8	75.41	[7.6-9.0]; 74.42	4	42.32	[4.0-4.4]; 43.86	_	69.04	4	33.09	False	Folded	None	4	0.261	8.8	0.096	0.118821	0.165	_	0.0964534	0.261263
D3YXK2	Scaffold attachment factor B1 (SAF-B1)	psself196	1	937	937	_	Mus musculus	_	32313950;31677973	56	422	367	8.4	129.89	[6.7-9.0]; 128.12	4	58.83	[4.0-4.1]; 60.72	_	125.53	3.7	71.06	True	F->U	4.95	4	0.185	8.4	-0.187	-0.170046	0.372	_	-0.18726	0.184884
D3YXK2	Scaffold attachment factor B1 (SAF-B1)	psself196	1	937	937	_	Mus musculus	_	32313950;31677973	482	656	175	6.4	174.06	[5.8-7.1]; 173.27	9	150.45	[8.9-9.0]; 151.39	_	172.35	10.1	23.61	False	Unfolded	None	9	-0.201	4	-0.317	-0.286825	0.116	_	-0.29615	-0.201138
D3YXK2	Scaffold attachment factor B1 (SAF-B1)	psself196	1	937	937	_	Mus musculus	_	32313950;31677973	686	735	50	7.6	229.14	[6.7-8.5]; 227.71	4	182.93	[4.0-4.4]; 184.59	_	227.47	11.4	46.21	False	Unfolded	None	5.1	-0.437	4	-0.516	-0.488032	0.079	_	-0.49154	-0.516335
D3YXK2	Scaffold attachment factor B1 (SAF-B1)	psself196	1	937	937	_	Mus musculus	_	32313950;31677973	762	937	176	8.3	131.98	[7.6-8.8]; 131.37	4	114.3	[4.0-4.4]; 114.97	_	128.06	11.8	17.68	False	Unfolded	None	9	-0.097	4	-0.134	-0.0988994	0.037	_	-0.108278	-0.134294
E9P860	NFX1-type zinc finger-containing protein 1 homolog (EC 3.6.4.13)	psother497	1	2443	2443	_	Caenorhabditis elegans	Z granule	33438773	207	346	140	8.4	72.25	[7.3-9.0]; 71.5	4	47.84	[4.0-4.7]; 48.62	_	68.56	5.2	24.41	False	Folded	None	5	0.218	8.4	0.123	0.137391	0.095	_	0.122587	0.191625
E9P860	NFX1-type zinc finger-containing protein 1 homolog (EC 3.6.4.13)	psother497	1	2443	2443	_	Caenorhabditis elegans	Z granule	33438773	575	671	97	8.5	181.46	[7.6-9.0]; 180.27	4	143.04	[4.0-4.4]; 144.49	_	172.9	7	38.42	False	Unfolded	None	6.5	-0.205	8.5	-0.249	-0.213159	0.044	_	-0.249197	-0.243792
F1QCP4	Cyclic GMP-AMP synthase	psother542	1	592	592	_	Danio rerio	_	33606975	1	199	199	6	145.34	[5.3-6.7]; 144.31	9	114.78	[8.9-9.0]; 115.68	_	140.48	9.6	30.56	False	Unfolded	None	9	-0.055	4	-0.207	-0.156086	0.152	_	-0.181232	-0.0548539
F1R237	Tudor domain-containing 6	psother121	1	2117	2117	_	Danio rerio	Germ plasm	30086300	1124	1220	97	6.1	101.62	[5.4-6.9]; 100.95	9	84.22	[8.9-9.0]; 84.82	_	99.46	9.8	17.4	True	U->F	7.85	9	0.036	4	-0.05	-0.0161398	0.086	_	-0.0278059	0.0356061
F1R237	Tudor domain-containing 6	psother121	1	2117	2117	_	Danio rerio	Germ plasm	30086300	1608	1630	23	6.3	59.59	[5.7-6.9]; 59.0	9	41.49	[8.9-9.0]; 41.99	_	57.55	8.8	18.1	False	Folded	None	9	0.267	4	0.128	0.206073	0.139	_	0.187838	0.266703
F1R237	Tudor domain-containing 6	psother121	1	2117	2117	_	Danio rerio	Germ plasm	30086300	1648	1696	49	9	94.94	[7.6-9.0]; 92.12	4	25.92	[4.0-4.3]; 28.49	_	82.63	2.8	69.02	True	F->U	5.35	4	0.205	9	-0.16	-0.120894	0.365	_	-0.160184	0.205411
F1R237	Tudor domain-containing 6	psother121	1	2117	2117	_	Danio rerio	Germ plasm	30086300	1905	1933	29	9	90.79	[7.1-9.0]; 88.77	4	27.7	[4.0-4.3]; 30.05	_	83.78	3.3	63.09	True	F->U	5.35	4	0.224	9	-0.145	-0.120603	0.369	_	-0.144904	0.223503
F1R237	Tudor domain-containing 6	psother121	1	2117	2117	_	Danio rerio	Germ plasm	30086300	1955	1983	29	9	122.42	[7.8-9.0]; 119.3	4	41.76	[4.0-4.3]; 44.76	_	104.96	3.4	80.66	True	F->U	4.75	4	0.142	9	-0.276	-0.212228	0.418	_	-0.275758	0.141528
F1R237	Tudor domain-containing 6	psother121	1	2117	2117	_	Danio rerio	Germ plasm	30086300	2027	2084	58	9	115.76	[8.0-9.0]; 112.69	4	44.36	[4.0-4.4]; 47.77	_	97.29	3.4	71.4	True	F->U	5.35	4	0.183	9	-0.205	-0.137409	0.388	_	-0.204779	0.18308
F4ID16	Nuclear pore complex protein NUP98B (Nucleoporin 98B) (Nucleoporin autopeptidase)	psself28	1	668	668	_	Arabidopsis thaliana	Nuclear pore complex	25562883;29424691	1	48	48	4.1	15.45	[4.0-5.5]; 15.21	9	6.97	[8.6-9.0]; 7.35	_	11.06	12.2	8.48	False	Folded	None	9	0.359	4	0.311	0.344191	0.048	_	0.310599	0.35943
F4ID16	Nuclear pore complex protein NUP98B (Nucleoporin 98B) (Nucleoporin autopeptidase)	psself28	1	668	668	_	Arabidopsis thaliana	Nuclear pore complex	25562883;29424691	61	90	30	9	-8.87	[4.0-4.0]; -8.87	9	-8.87	[4.0-4.0]; -8.87	_	-8.87	7	0	False	Folded	None	4	0.456	4	0.456	0.455643	0	_	0.455643	0.455643
F4ID16	Nuclear pore complex protein NUP98B (Nucleoporin 98B) (Nucleoporin autopeptidase)	psself28	1	668	668	_	Arabidopsis thaliana	Nuclear pore complex	25562883;29424691	109	145	37	4.2	14.1	[4.0-5.9]; 13.9	9	6.33	[8.7-9.0]; 6.7	_	11.24	12.2	7.77	False	Folded	None	9	0.348	4	0.322	0.331304	0.026	_	0.32179	0.348337
F4ID16	Nuclear pore complex protein NUP98B (Nucleoporin 98B) (Nucleoporin autopeptidase)	psself28	1	668	668	_	Arabidopsis thaliana	Nuclear pore complex	25562883;29424691	175	204	30	9	-14.96	[4.0-4.0]; -14.96	9	-14.96	[4.0-4.0]; -14.96	_	-14.96	7	0	False	Folded	None	4	0.467	4	0.467	0.466643	0	_	0.466643	0.466643
F4ID16	Nuclear pore complex protein NUP98B (Nucleoporin 98B) (Nucleoporin autopeptidase)	psself28	1	668	668	_	Arabidopsis thaliana	Nuclear pore complex	25562883;29424691	297	467	171	7	40.73	[6.3-7.8]; 40.56	4.1	36.04	[4.0-4.6]; 36.15	_	40.73	9.2	4.69	False	Folded	None	9	0.274	4	0.258	0.262383	0.016	_	0.262383	0.259562
F4ID16	Nuclear pore complex protein NUP98B (Nucleoporin 98B) (Nucleoporin autopeptidase)	psself28	1	668	668	_	Arabidopsis thaliana	Nuclear pore complex	25562883;29424691	512	556	45	9	-5.28	[4.0-4.0]; -5.28	9	-5.28	[4.0-4.0]; -5.28	_	-5.28	7	0	False	Folded	None	4	0.43	4	0.43	0.430339	0	_	0.430339	0.430339
F4ID16	Nuclear pore complex protein NUP98B (Nucleoporin 98B) (Nucleoporin autopeptidase)	psself28	1	668	668	_	Arabidopsis thaliana	Nuclear pore complex	25562883;29424691	642	665	24	9	-32.76	[4.0-4.0]; -32.76	9	-32.76	[4.0-4.0]; -32.76	_	-32.76	7	0	False	Folded	None	4	0.522	4	0.522	0.522345	0	_	0.522345	0.522345
F4IS91	Protein SHORT ROOT IN SALT MEDIUM 1 (AtRSA1) (Protein EMBRYO DEFECTIVE 1579)	psself234	1	1340	1340	_	Arabidopsis thaliana	_	32692742	1	73	73	8.4	74.15	[7.7-9.0]; 73.88	4	66.5	[4.0-4.4]; 66.86	_	72.32	8.8	7.65	False	Folded	None	7.2	0.162	4	0.127	0.16216	0.035	_	0.159865	0.127245
F4IS91	Protein SHORT ROOT IN SALT MEDIUM 1 (AtRSA1) (Protein EMBRYO DEFECTIVE 1579)	psself234	1	1340	1340	_	Arabidopsis thaliana	_	32692742	123	143	21	5.2	58.99	[4.0-6.0]; 58.24	9	35.86	[8.8-9.0]; 36.66	_	50.32	9.6	23.13	False	Folded	None	9	0.218	4	0.1	0.168886	0.118	_	0.109058	0.218256
F4IS91	Protein SHORT ROOT IN SALT MEDIUM 1 (AtRSA1) (Protein EMBRYO DEFECTIVE 1579)	psself234	1	1340	1340	_	Arabidopsis thaliana	_	32692742	164	192	29	8.4	110.14	[7.4-9.0]; 109.15	4	78.66	[4.0-4.4]; 79.84	_	104.81	7	31.48	False	Folded	None	4.8	0.088	8.4	0.007	0.0284344	0.081	_	0.00735902	0.0672628
F4IS91	Protein SHORT ROOT IN SALT MEDIUM 1 (AtRSA1) (Protein EMBRYO DEFECTIVE 1579)	psself234	1	1340	1340	_	Arabidopsis thaliana	_	32692742	214	346	133	8.6	87.88	[7.8-9.0]; 87.19	4	63.87	[4.0-4.5]; 64.77	_	81.08	7	24.01	False	Folded	None	4.8	0.136	8.6	0.084	0.110494	0.052	_	0.0837227	0.121665
F4IS91	Protein SHORT ROOT IN SALT MEDIUM 1 (AtRSA1) (Protein EMBRYO DEFECTIVE 1579)	psself234	1	1340	1340	_	Arabidopsis thaliana	_	32692742	349	475	127	7.6	234.62	[6.7-8.4]; 233.47	4	195.17	[4.0-4.4]; 196.61	_	233.18	11.8	39.45	False	Unfolded	None	5	-0.471	7.5	-0.531	-0.527919	0.06	_	-0.53114	-0.527724
F4IS91	Protein SHORT ROOT IN SALT MEDIUM 1 (AtRSA1) (Protein EMBRYO DEFECTIVE 1579)	psself234	1	1340	1340	_	Arabidopsis thaliana	_	32692742	719	752	34	5.8	123.36	[5.0-6.6]; 121.72	9	78.98	[8.8-9.0]; 81.04	_	114.18	10	44.38	False	Non-confident transition	None	9	0.017	4	-0.152	-0.109091	0.169	_	-0.139859	0.0170939
F4IS91	Protein SHORT ROOT IN SALT MEDIUM 1 (AtRSA1) (Protein EMBRYO DEFECTIVE 1579)	psself234	1	1340	1340	_	Arabidopsis thaliana	_	32692742	761	834	74	6.1	88.94	[5.4-6.7]; 88.02	9	59.92	[8.8-9.0]; 61.36	_	84.28	9.2	29.02	False	Folded	None	9	0.165	4	0.037	0.0784253	0.128	_	0.0598482	0.16542
F4IS91	Protein SHORT ROOT IN SALT MEDIUM 1 (AtRSA1) (Protein EMBRYO DEFECTIVE 1579)	psself234	1	1340	1340	_	Arabidopsis thaliana	_	32692742	837	1000	164	6.4	150.62	[5.8-7.0]; 149.63	9	122.33	[8.9-9.0]; 123.28	_	148.44	8.8	28.29	False	Unfolded	None	9	-0.059	4	-0.177	-0.159334	0.118	_	-0.16765	-0.0593716
F4IS91	Protein SHORT ROOT IN SALT MEDIUM 1 (AtRSA1) (Protein EMBRYO DEFECTIVE 1579)	psself234	1	1340	1340	_	Arabidopsis thaliana	_	32692742	1062	1271	210	7.7	172.77	[6.4-9.0]; 170.7	4	95.83	[4.0-4.2]; 99.56	_	171.15	3.9	76.94	True	F->U	4.25	4	0.065	7.7	-0.351	-0.34427	0.416	_	-0.351142	0.0648278
F6SEU4	Ras/Rap GTPase-activating protein SynGAP (Neuronal RasGAP) (Synaptic Ras GTPase-activating protein 1) (Synaptic Ras-GAP 1)	psother254	1	1340	1340	_	Mus musculus	Postsynaptic density	31492534	78	122	45	5.8	120.71	[5.0-6.6]; 119.9	9	98.3	[8.9-9.0]; 99.04	_	116.65	11.8	22.41	False	Unfolded	None	9	-0.095	4	-0.262	-0.16467	0.167	_	-0.211768	-0.0953884
F6SEU4	Ras/Rap GTPase-activating protein SynGAP (Neuronal RasGAP) (Synaptic Ras GTPase-activating protein 1) (Synaptic Ras-GAP 1)	psother254	1	1340	1340	_	Mus musculus	Postsynaptic density	31492534	373	395	23	4	83.12	[4.0-5.9]; 82.45	9	57.72	[8.7-9.0]; 58.93	_	73.74	12.2	25.4	False	Folded	None	9	0.119	4	0.026	0.0593673	0.093	_	0.0256847	0.11926
F6SEU4	Ras/Rap GTPase-activating protein SynGAP (Neuronal RasGAP) (Synaptic Ras GTPase-activating protein 1) (Synaptic Ras-GAP 1)	psother254	1	1340	1340	_	Mus musculus	Postsynaptic density	31492534	725	755	31	7.4	108.95	[6.6-8.2]; 108.53	4	97.21	[4.0-4.4]; 97.65	_	108.64	12.8	11.74	False	Unfolded	None	9	-0.08	7.4	-0.106	-0.105003	0.026	_	-0.105989	-0.103234
F6SEU4	Ras/Rap GTPase-activating protein SynGAP (Neuronal RasGAP) (Synaptic Ras GTPase-activating protein 1) (Synaptic Ras-GAP 1)	psother254	1	1340	1340	_	Mus musculus	Postsynaptic density	31492534	779	809	31	6.4	25.23	[5.9-7.1]; 24.88	4	14.16	[4.0-9.0]; 14.66	_	24.53	9.6	11.07	False	Folded	None	9	0.32	6.3	0.275	0.278771	0.045	_	0.275156	0.276696
F6SEU4	Ras/Rap GTPase-activating protein SynGAP (Neuronal RasGAP) (Synaptic Ras GTPase-activating protein 1) (Synaptic Ras-GAP 1)	psother254	1	1340	1340	_	Mus musculus	Postsynaptic density	31492534	818	868	51	8.5	59.31	[7.2-9.0]; 58.64	4	34.65	[4.0-4.3]; 35.84	_	56.43	3.9	24.66	False	Folded	None	4	0.264	8.5	0.129	0.139138	0.135	_	0.128973	0.264388
F6SEU4	Ras/Rap GTPase-activating protein SynGAP (Neuronal RasGAP) (Synaptic Ras GTPase-activating protein 1) (Synaptic Ras-GAP 1)	psother254	1	1340	1340	_	Mus musculus	Postsynaptic density	31492534	875	924	50	8.1	33.53	[7.4-8.6]; 33.33	4	28.09	[4.0-4.4]; 28.3	_	32.45	13	5.44	False	Folded	None	4.5	0.243	8.1	0.229	0.232362	0.014	_	0.22873	0.241579
F6SEU4	Ras/Rap GTPase-activating protein SynGAP (Neuronal RasGAP) (Synaptic Ras GTPase-activating protein 1) (Synaptic Ras-GAP 1)	psother254	1	1340	1340	_	Mus musculus	Postsynaptic density	31492534	929	1169	241	5.1	65.38	[4.0-5.6]; 65.08	9	51.78	[8.6-9.0]; 52.49	_	56.34	9.6	13.6	False	Folded	None	9	0.214	4	0.097	0.192267	0.117	_	0.116552	0.214426
F6SEU4	Ras/Rap GTPase-activating protein SynGAP (Neuronal RasGAP) (Synaptic Ras GTPase-activating protein 1) (Synaptic Ras-GAP 1)	psother254	1	1340	1340	_	Mus musculus	Postsynaptic density	31492534	1186	1210	25	7.1	160.07	[6.3-8.1]; 158.83	4	123.05	[4.0-4.3]; 124.53	_	160.05	5.7	37.02	False	Unfolded	None	5.3	-0.116	7.4	-0.25	-0.247002	0.134	_	-0.24857	-0.193417
F6SEU4	Ras/Rap GTPase-activating protein SynGAP (Neuronal RasGAP) (Synaptic Ras GTPase-activating protein 1) (Synaptic Ras-GAP 1)	psother254	1	1340	1340	_	Mus musculus	Postsynaptic density	31492534	1270	1340	71	7.8	44.5	[6.7-8.6]; 44.0	4	28.78	[4.0-4.4]; 29.5	_	43.77	10.1	15.72	False	Folded	None	9	0.285	4	0.246	0.269254	0.039	_	0.269933	0.245614
F7B8L6	Cyclic GMP-AMP synthase	psother543	1	573	573	_	Macaca mulatta	_	33606975	1	154	154	6.9	95.83	[6.2-7.5]; 95.5	9	85.82	[4.0-9.0]; 86.26	_	95.78	12.2	10.01	False	Non-confident transition	None	9	0.019	6.9	-0.018	-0.0180016	0.037	_	-0.0181364	0.018957
G3SC39	Cyclic GMP-AMP synthase	psother544	1	447	447	_	Gorilla gorilla gorilla	_	33606975	1	148	148	6.4	76.92	[5.7-7.1]; 76.52	9	64.89	[8.9-9.0]; 65.41	_	76.14	11.4	12.03	False	Folded	None	9	0.105	4	0.049	0.0620172	0.056	_	0.0582595	0.105195
G5EBV6	Guanyl-specific ribonuclease pgl-3 (EC 4.6.1.24) (P granule abnormality protein 3)	psself121	1	693	693	pH 7.5	Caenorhabditis elegans	P granule	30173914	449	476	28	6.3	52.73	[5.6-6.9]; 52.48	9	46	[8.8-9.0]; 46.32	Middle	51.94	7	6.73	False	Folded	None	9	0.248	4	0.215	0.226836	0.033	Folded	0.223453	0.247851
G5EBV6	Guanyl-specific ribonuclease pgl-3 (EC 4.6.1.24) (P granule abnormality protein 3)	psself121	1	693	693	pH 7.5	Caenorhabditis elegans	P granule	30173914	515	607	93	7.4	56.71	[6.4-8.9]; 55.72	4	26.29	[4.0-4.2]; 27.51	10% maximum solubility	56.39	3.9	30.42	False	Folded	None	4	0.316	7.7	0.135	0.13804	0.181	Folded	0.135724	0.315814
G5EBV6	Guanyl-specific ribonuclease pgl-3 (EC 4.6.1.24) (P granule abnormality protein 3)	psself121	1	693	693	pH 7.5	Caenorhabditis elegans	P granule	30173914	612	693	82	8.2	107.78	[7.5-8.8]; 107.23	4	92.16	[4.0-4.5]; 92.83	10% maximum solubility	104.64	12	15.62	False	Unfolded	None	4.5	-0.049	8.2	-0.098	-0.085403	0.049	Unfolded	-0.0983149	-0.0540228
G5EBV6	Guanyl-specific ribonuclease pgl-3 (EC 4.6.1.24) (P granule abnormality protein 3)	psself52	1	633	633	pH 7.5	Caenorhabditis elegans	P granule	27594427	613	634	22	6.1	54.49	[4.0-7.7]; 54.46	9	51.33	[9.0-9.0]; 51.33	10% maximum solubility	54.44	12.5	3.16	False	Folded	None	9	0.109	4	0.096	0.0963171	0.013	Folded	0.0961265	0.109083
G5EC37	Protein sepa-1 (Suppressor of ectopic P granules in autophagy)	psother126	1	702	702	pH 7.5	Caenorhabditis elegans	P granule	30173914	376	399	24	6.8	120.73	[6.1-7.5]; 119.69	4	88.95	[4.0-4.3]; 90.3	10% maximum solubility	120.39	4.8	31.78	Possible Multitransition	Variable	[4.249999999999999; 5.049999999999996]	4.8	0.033	7	-0.121	-0.120526	0.154	Variable	-0.119737	-0.0256723
G5EC37	Protein sepa-1 (Suppressor of ectopic P granules in autophagy)	psother126	1	702	702	pH 7.5	Caenorhabditis elegans	P granule	30173914	415	522	108	7	116.11	[6.3-8.0]; 114.93	4	78.78	[4.0-4.5]; 80.01	10% maximum solubility	116.11	4.4	37.33	True	F->U	5.55	4.4	0.126	7.1	-0.065	-0.064437	0.191	Unfolded	-0.064437	0.0935387
G5EC37	Protein sepa-1 (Suppressor of ectopic P granules in autophagy)	psother126	1	702	702	pH 7.5	Caenorhabditis elegans	P granule	30173914	524	581	58	6.8	96.03	[6.2-7.6]; 95.18	4	71.95	[4.0-4.4]; 72.91	10% maximum solubility	95.89	4.6	24.08	False	Folded	None	4.8	0.128	6.8	0.032	0.0322003	0.096	Folded	0.0318414	0.0857088
G5EC37	Protein sepa-1 (Suppressor of ectopic P granules in autophagy)	psother126	1	702	702	pH 7.5	Caenorhabditis elegans	P granule	30173914	675	702	28	6.1	166.01	[5.6-6.7]; 165.42	9	147.83	[4.0-9.0]; 148.72	Middle	163.14	8.8	18.18	False	Unfolded	None	9	-0.121	4	-0.325	-0.188776	0.204	Unfolded	-0.239725	-0.121133
G5EDE7	TPX2 (Targeting Protein for Xenopus Klp2)-Like (TPX2-related alternative variant a)	psother77	1	507	507	_	Caenorhabditis elegans	Pericentriolar matrix	28575670	26	46	21	8.4	91.56	[7.3-9.0]; 90.62	4	57.67	[4.0-4.4]; 58.94	_	86.84	4.4	33.89	False	Folded	None	4.4	0.188	8.5	0.028	0.0459779	0.16	_	0.0281026	0.171629
G5EDE7	TPX2 (Targeting Protein for Xenopus Klp2)-Like (TPX2-related alternative variant a)	psother77	1	507	507	_	Caenorhabditis elegans	Pericentriolar matrix	28575670	54	507	454	6.3	92.19	[5.5-7.0]; 91.77	9	79.69	[8.9-9.0]; 80.22	_	91.16	12	12.5	False	Folded	None	9	0.09	4	0.034	0.047484	0.056	_	0.0429324	0.0896706
G5EEH9	Nuclear pore complex protein Nup98-Nup96 (EC 3.4.21.-) [Cleaved into: Nuclear pore complex protein Nup98 (98 kDa nucleoporin) (Nucleoporin Nup98) (CeNup98); Nuclear pore complex protein Nup96 (96 kDa nucleoporin) (Nucleoporin Nup96) (CeNup96)]	psself29	1	493	493	_	Caenorhabditis elegans	Nuclear pore complex	25562883;29424691	18	52	35	4.1	27.3	[4.0-5.9]; 27.08	9	19.09	[8.7-9.0]; 19.48	_	24.27	12.2	8.21	False	Folded	None	9	0.304	4	0.27	0.282249	0.034	_	0.270199	0.30363
G5EEH9	Nuclear pore complex protein Nup98-Nup96 (EC 3.4.21.-) [Cleaved into: Nuclear pore complex protein Nup98 (98 kDa nucleoporin) (Nucleoporin Nup98) (CeNup98); Nuclear pore complex protein Nup96 (96 kDa nucleoporin) (Nucleoporin Nup96) (CeNup96)]	psself29	1	493	493	_	Caenorhabditis elegans	Nuclear pore complex	25562883;29424691	64	92	29	9	34.49	[4.0-4.0]; 34.49	9	34.49	[4.0-4.0]; 34.49	_	34.49	7	0	False	Folded	None	4	0.293	4	0.293	0.293019	0	_	0.293019	0.293019
G5EEH9	Nuclear pore complex protein Nup98-Nup96 (EC 3.4.21.-) [Cleaved into: Nuclear pore complex protein Nup98 (98 kDa nucleoporin) (Nucleoporin Nup98) (CeNup98); Nuclear pore complex protein Nup96 (96 kDa nucleoporin) (Nucleoporin Nup96) (CeNup96)]	psself29	1	493	493	_	Caenorhabditis elegans	Nuclear pore complex	25562883;29424691	147	169	23	7.4	32.61	[6.4-8.5]; 32.15	4	18.83	[4.0-4.3]; 19.44	_	32.45	7	13.78	False	Folded	None	4.8	0.301	7.3	0.279	0.279429	0.022	_	0.279073	0.288163
G5EEH9	Nuclear pore complex protein Nup98-Nup96 (EC 3.4.21.-) [Cleaved into: Nuclear pore complex protein Nup98 (98 kDa nucleoporin) (Nucleoporin Nup98) (CeNup98); Nuclear pore complex protein Nup96 (96 kDa nucleoporin) (Nucleoporin Nup96) (CeNup96)]	psself29	1	493	493	_	Caenorhabditis elegans	Nuclear pore complex	25562883;29424691	237	266	30	9	13.6	[4.0-4.0]; 13.6	9	13.6	[4.0-4.0]; 13.6	_	13.6	7	0	False	Folded	None	4	0.351	4	0.351	0.351022	0	_	0.351022	0.351022
G5EEH9	Nuclear pore complex protein Nup98-Nup96 (EC 3.4.21.-) [Cleaved into: Nuclear pore complex protein Nup98 (98 kDa nucleoporin) (Nucleoporin Nup98) (CeNup98); Nuclear pore complex protein Nup96 (96 kDa nucleoporin) (Nucleoporin Nup96) (CeNup96)]	psself29	1	493	493	_	Caenorhabditis elegans	Nuclear pore complex	25562883;29424691	298	388	91	9	13.11	[4.0-4.0]; 13.11	9	13.11	[4.0-4.0]; 13.11	_	13.11	7	0	False	Folded	None	4	0.363	4	0.363	0.36287	0	_	0.36287	0.36287
G5EEH9	Nuclear pore complex protein Nup98-Nup96 (EC 3.4.21.-) [Cleaved into: Nuclear pore complex protein Nup98 (98 kDa nucleoporin) (Nucleoporin Nup98) (CeNup98); Nuclear pore complex protein Nup96 (96 kDa nucleoporin) (Nucleoporin Nup96) (CeNup96)]	psself29	1	493	493	_	Caenorhabditis elegans	Nuclear pore complex	25562883;29424691	403	485	83	4.3	1.61	[4.0-5.9]; 1.52	9	-1.86	[8.7-9.0]; -1.7	_	0.33	12.2	3.47	False	Folded	None	9	0.397	4	0.383	0.387942	0.014	_	0.382939	0.396857
G5EEM5	Zygote defective protein 9	psother78	1	1415	1415	_	Caenorhabditis elegans	Pericentriolar matrix	28575670	241	281	41	7.7	37.73	[6.5-9.0]; 37.36	4	23.91	[4.0-4.3]; 24.58	_	37.39	3.7	13.82	False	Folded	None	4	0.313	8.1	0.23	0.231971	0.083	_	0.230042	0.312807
G5EEM5	Zygote defective protein 9	psother78	1	1415	1415	_	Caenorhabditis elegans	Pericentriolar matrix	28575670	530	606	77	6.5	81.22	[6.0-7.1]; 80.36	4	53.45	[4.0-4.4]; 54.59	_	79.71	4.6	27.77	False	Folded	None	4.7	0.18	6.6	0.047	0.0513872	0.133	_	0.0474662	0.132875
G5EEM5	Zygote defective protein 9	psother78	1	1415	1415	_	Caenorhabditis elegans	Pericentriolar matrix	28575670	867	934	68	7	73.64	[6.3-7.8]; 73.25	4	62.02	[4.0-4.3]; 62.42	_	73.64	11.8	11.62	False	Folded	None	4.8	0.083	7.2	0.056	0.0559363	0.027	_	0.0559363	0.0682593
G5EEM5	Zygote defective protein 9	psother78	1	1415	1415	_	Caenorhabditis elegans	Pericentriolar matrix	28575670	944	985	42	8.7	53.41	[7.8-9.0]; 52.89	4	33.29	[4.0-4.4]; 34.18	_	48.61	7	20.12	False	Folded	None	4.6	0.266	8.3	0.239	0.244476	0.027	_	0.239668	0.259106
G5EEM5	Zygote defective protein 9	psother78	1	1415	1415	_	Caenorhabditis elegans	Pericentriolar matrix	28575670	1381	1415	35	5.6	119.69	[4.8-6.4]; 119.13	9	104.42	[8.9-9.0]; 105.15	_	116.73	12.9	15.27	False	Unfolded	None	9	-0.157	4	-0.261	-0.203359	0.104	_	-0.245713	-0.156849
H0WFA5	Bucky ball (buc) (Prion-like protein Bucky ball)	psother122	1	639	639	_	Danio rerio	Balbiani body	30086300	147	201	55	8.2	98.14	[6.8-9.0]; 96.99	4	54.75	[4.0-4.2]; 56.19	_	95.22	4	43.39	True	F->U	5.75	4	0.195	8.1	-0.057	-0.0483147	0.252	_	-0.0568346	0.195294
H0WFA5	Bucky ball (buc) (Prion-like protein Bucky ball)	psother122	1	639	639	_	Danio rerio	Balbiani body	30086300	218	251	34	9	173.39	[7.3-9.0]; 169.53	4	71.38	[4.0-4.3]; 75.16	_	159.35	3.3	102.01	True	F->U	4.05	4	0.02	9	-0.621	-0.566495	0.641	_	-0.621141	0.0200804
I3LM39	Cyclic GMP-AMP synthase (cGAMP synthase) (cGAS) (EC 2.7.7.86) (2'3'-cGAMP synthase) (Mab-21 domain-containing protein 1)	psother545	1	495	495	_	Sus scrofa	_	33606975	1	105	105	7.2	113.73	[6.5-7.9]; 113.35	4	100.74	[4.0-4.5]; 101.3	_	113.68	12.2	12.99	False	Unfolded	None	9	-0.056	7.3	-0.085	-0.0847258	0.029	_	-0.0852114	-0.077038
I3LM39	Cyclic GMP-AMP synthase (cGAMP synthase) (cGAS) (EC 2.7.7.86) (2'3'-cGAMP synthase) (Mab-21 domain-containing protein 1)	psother545	1	495	495	_	Sus scrofa	_	33606975	107	132	26	7.7	110.41	[6.7-8.6]; 109.46	4	81.6	[4.0-4.4]; 82.69	_	109.26	11.8	28.81	False	Non-confident transition	None	5	0.015	7.6	-0.039	-0.0354167	0.054	_	-0.0393926	-0.0265201
J3QQ18	Ras/Rap GTPase-activating protein SynGAP	psother58	1147	1380	234	_	Mus musculus	Postsynaptic density	27565345;29424691	1270	1292	23	7.3	100.01	[6.3-8.3]; 99.29	4	75.26	[4.0-4.2]; 76.09	_	99.82	10.1	24.75	False	Non-confident transition	None	9	0.06	4	-0.014	0.0210437	0.074	_	0.0231204	-0.01352
J7I6Y1	Nuclear pore complex protein Nup96 (Nuclear pore complex protein Nup98) (Nuclear pore complex protein Nup98-Nup96) (Nucleoporin Nup96) (Nucleoporin Nup98)	psself11	1	485	485	_	Xenopus tropicalis	Nuclear pore complex	23202855;29424691	202	231	30	7.4	52.72	[6.5-8.4]; 52.26	4	37.92	[4.0-4.3]; 38.47	_	52.46	7	14.8	False	Folded	None	4.9	0.245	7.4	0.218	0.218466	0.027	_	0.217507	0.22524
J7I6Y1	Nuclear pore complex protein Nup96 (Nuclear pore complex protein Nup98) (Nuclear pore complex protein Nup98-Nup96) (Nucleoporin Nup96) (Nucleoporin Nup98)	psself11	1	485	485	_	Xenopus tropicalis	Nuclear pore complex	23202855;29424691	314	339	26	9	0.71	[4.0-4.0]; 0.71	9	0.71	[4.0-4.0]; 0.71	_	0.71	7	0	False	Folded	None	4	0.41	4	0.41	0.410206	0	_	0.410206	0.410206
J7I6Y1	Nuclear pore complex protein Nup96 (Nuclear pore complex protein Nup98) (Nuclear pore complex protein Nup98-Nup96) (Nucleoporin Nup96) (Nucleoporin Nup98)	psself11	1	485	485	_	Xenopus tropicalis	Nuclear pore complex	23202855;29424691	345	370	26	9	-43.89	[4.0-4.0]; -43.89	9	-43.89	[4.0-4.0]; -43.89	_	-43.89	7	0	False	Folded	None	4	0.56	4	0.56	0.559605	0	_	0.559605	0.559605
K9ZRR1	Nup153	psself12	885	1525	641	_	Xenopus tropicalis	Nuclear pore complex	23202855;29424691	1005	1032	28	7.5	106.32	[6.4-8.7]; 105.38	4	76.61	[4.0-4.3]; 77.91	_	105.86	4.6	29.71	False	Non-confident transition	None	4.5	0.104	7.4	-0.011	-0.00975102	0.115	_	-0.010651	0.0832869
K9ZRR1	Nup153	psself12	885	1525	641	_	Xenopus tropicalis	Nuclear pore complex	23202855;29424691	1086	1135	50	6.3	43.16	[5.7-6.9]; 42.57	9	25.06	[8.9-9.0]; 25.59	_	41.28	9.2	18.1	False	Folded	None	9	0.281	4	0.208	0.224462	0.073	_	0.21894	0.281149
K9ZRR1	Nup153	psself12	885	1525	641	_	Xenopus tropicalis	Nuclear pore complex	23202855;29424691	1399	1422	24	4	24.62	[4.0-5.1]; 24.47	9	20.19	[7.2-9.0]; 20.28	_	20.74	10.5	4.43	False	Folded	None	9	0.339	4	0.283	0.333018	0.056	_	0.283255	0.338591
K9ZRR1	Nup153	psself12	885	1525	641	_	Xenopus tropicalis	Nuclear pore complex	23202855;29424691	1437	1467	31	9	2.39	[4.0-4.0]; 2.39	9	2.39	[4.0-4.0]; 2.39	_	2.39	7	0	False	Folded	None	4	0.415	4	0.415	0.414869	0	_	0.414869	0.414869
M9NFQ7	RNA-binding Fox protein 1; isoform H	psother92	1	962	962	_	Drosophila melanogaster	Nucleolus;Cajal body;Stress granule;P-body	29358748	3	45	43	7.8	0.92	[6.6-9.0]; 0.65	4	-8.95	[4.0-4.4]; -8.57	_	0.58	5.2	9.87	False	Folded	None	5.2	0.42	8	0.358	0.362449	0.062	_	0.358196	0.394938
M9NFQ7	RNA-binding Fox protein 1; isoform H	psother92	1	962	962	_	Drosophila melanogaster	Nucleolus;Cajal body;Stress granule;P-body	29358748	47	153	107	7.5	53.25	[6.3-8.9]; 53.03	4	46.14	[4.0-4.2]; 46.45	_	53.18	3.9	7.11	False	Folded	None	4	0.233	7.4	0.194	0.1947	0.039	_	0.194443	0.233419
M9NFQ7	RNA-binding Fox protein 1; isoform H	psother92	1	962	962	_	Drosophila melanogaster	Nucleolus;Cajal body;Stress granule;P-body	29358748	175	241	67	7.6	41.39	[6.5-8.9]; 41.09	4	31.62	[4.0-4.4]; 32.0	_	41.2	5.2	9.77	False	Folded	None	5.2	0.282	8.1	0.217	0.222131	0.065	_	0.217906	0.261112
M9NFQ7	RNA-binding Fox protein 1; isoform H	psother92	1	962	962	_	Drosophila melanogaster	Nucleolus;Cajal body;Stress granule;P-body	29358748	254	356	103	9	50.36	[7.4-9.0]; 49.89	4	38.29	[4.0-4.3]; 38.84	_	48.68	3.5	12.07	False	Folded	None	4	0.267	9	0.193	0.200131	0.074	_	0.193052	0.266682
M9NFQ7	RNA-binding Fox protein 1; isoform H	psother92	1	962	962	_	Drosophila melanogaster	Nucleolus;Cajal body;Stress granule;P-body	29358748	587	614	28	4	45.96	[4.0-5.1]; 45.07	9	18.94	[7.2-9.0]; 19.51	_	22.31	8.8	27.02	False	Folded	None	9	0.337	4	0.004	0.303539	0.333	_	0.0043627	0.337068
M9NFQ7	RNA-binding Fox protein 1; isoform H	psother92	1	962	962	_	Drosophila melanogaster	Nucleolus;Cajal body;Stress granule;P-body	29358748	649	725	77	4	87.1	[4.0-5.1]; 86.51	9	69.34	[7.1-9.0]; 69.77	_	71.47	10.5	17.76	False	Non-confident transition	None	9	0.154	4	-0.017	0.137125	0.171	_	-0.0169039	0.154337
O00401	Neural Wiskott-Aldrich syndrome protein (N-WASP)	psother466	1	505	505	_	Homo sapiens	Receptor cluster	33218630;26553976	141	163	23	6.8	122.14	[6.1-7.7]; 121.61	4	106.21	[4.0-4.2]; 106.79	_	122.09	12	15.93	False	Unfolded	None	9	-0.128	7.1	-0.169	-0.168526	0.041	_	-0.1681	-0.153912
O00401	Neural Wiskott-Aldrich syndrome protein (N-WASP)	psother466	1	505	505	_	Homo sapiens	Receptor cluster	33218630;26553976	175	505	331	7.7	45.41	[6.7-8.6]; 44.94	4.5	30.49	[4.0-5.1]; 30.99	_	44.83	5.2	14.92	False	Folded	None	4.9	0.291	7.5	0.24	0.241859	0.051	_	0.240337	0.287629
O00444	Serine/threonine-protein kinase PLK4 (EC 2.7.11.21) (Polo-like kinase 4) (PLK-4) (Serine/threonine-protein kinase 18) (Serine/threonine-protein kinase Sak)	psother484	1	970	970	_	Homo sapiens	Centrosome	33323015	340	398	59	7.8	115.81	[6.8-8.6]; 115.26	4	99.56	[4.0-4.4]; 100.25	_	114.83	10.3	16.25	False	Unfolded	None	4.9	-0.067	7.9	-0.091	-0.0872319	0.024	_	-0.0912207	-0.0861637
O00444	Serine/threonine-protein kinase PLK4 (EC 2.7.11.21) (Polo-like kinase 4) (PLK-4) (Serine/threonine-protein kinase 18) (Serine/threonine-protein kinase Sak)	psother484	1	970	970	_	Homo sapiens	Centrosome	33323015	402	433	32	7.7	70.01	[6.6-8.9]; 69.1	4	40.81	[4.0-4.4]; 42.03	_	69.1	4.3	29.2	False	Folded	None	4.3	0.234	7.7	0.077	0.0803647	0.157	_	0.0768714	0.217726
O00444	Serine/threonine-protein kinase PLK4 (EC 2.7.11.21) (Polo-like kinase 4) (PLK-4) (Serine/threonine-protein kinase 18) (Serine/threonine-protein kinase Sak)	psother484	1	970	970	_	Homo sapiens	Centrosome	33323015	438	484	47	8.4	29.39	[7.1-9.0]; 28.93	4	13.15	[4.0-4.4]; 13.83	_	27.65	4.5	16.24	False	Folded	None	4.4	0.374	8.3	0.291	0.296859	0.083	_	0.291294	0.364292
O00444	Serine/threonine-protein kinase PLK4 (EC 2.7.11.21) (Polo-like kinase 4) (PLK-4) (Serine/threonine-protein kinase 18) (Serine/threonine-protein kinase Sak)	psother484	1	970	970	_	Homo sapiens	Centrosome	33323015	490	545	56	6.2	109.58	[5.7-6.9]; 109.13	4	96.39	[4.0-9.0]; 97.0	_	108.02	9.4	13.19	True	U->F	8.25	9	0.026	4	-0.05	-0.0211062	0.076	_	-0.0364736	-0.0496587
O00444	Serine/threonine-protein kinase PLK4 (EC 2.7.11.21) (Polo-like kinase 4) (PLK-4) (Serine/threonine-protein kinase 18) (Serine/threonine-protein kinase Sak)	psother484	1	970	970	_	Homo sapiens	Centrosome	33323015	810	830	21	7.3	53.99	[6.3-8.3]; 53.58	4	41.47	[4.0-4.3]; 42.06	_	53.92	7	12.52	False	Folded	None	4.8	0.227	7.3	0.202	0.202477	0.025	_	0.202052	0.212042
O00571	ATP-dependent RNA helicase DDX3X (EC 3.6.4.13) (CAP-Rf) (DEAD box protein 3; X-chromosomal) (DEAD box; X isoform) (DBX) (Helicase-like protein 2) (HLP2)	psother228	1	662	662	pH 7.5	Homo sapiens	Stress granule	31435012	17	51	35	6.7	95.52	[5.9-7.8]; 95.23	4	86.1	[4.0-4.2]; 86.49	10% maximum solubility	95.46	10.3	9.42	True	U->F	6.45	9	0.032	4	-0.022	0.00571812	0.054	Folded	0.00315044	-0.021909
O00571	ATP-dependent RNA helicase DDX3X (EC 3.6.4.13) (CAP-Rf) (DEAD box protein 3; X-chromosomal) (DEAD box; X isoform) (DBX) (Helicase-like protein 2) (HLP2)	psother228	1	662	662	pH 7.5	Homo sapiens	Stress granule	31435012	95	117	23	8.8	157.88	[7.9-9.0]; 155.59	4	84.61	[4.0-4.5]; 88.07	Middle	135.82	7	73.27	True	F->U	5.55	4.5	0.041	8.8	-0.162	-0.0871056	0.203	Unfolded	-0.162089	0.027545
O00571	ATP-dependent RNA helicase DDX3X (EC 3.6.4.13) (CAP-Rf) (DEAD box protein 3; X-chromosomal) (DEAD box; X isoform) (DBX) (Helicase-like protein 2) (HLP2)	psother228	1	662	662	pH 7.5	Homo sapiens	Stress granule	31435012	129	152	24	8.5	115.46	[7.1-9.0]; 113.53	4	45.6	[4.0-4.3]; 48.52	10% maximum solubility	107.88	3.8	69.86	True	F->U	4.95	4	0.192	8.6	-0.221	-0.18994	0.413	Unfolded	-0.220949	0.191703
O00571	ATP-dependent RNA helicase DDX3X (EC 3.6.4.13) (CAP-Rf) (DEAD box protein 3; X-chromosomal) (DEAD box; X isoform) (DBX) (Helicase-like protein 2) (HLP2)	psother228	1	662	662	pH 7.5	Homo sapiens	Stress granule	31435012	608	632	25	4	127.78	[4.0-5.4]; 127.54	9	119.18	[8.9-9.0]; 119.49	Middle	123.98	14.5	8.6	False	Unfolded	None	9	-0.142	4	-0.212	-0.164056	0.07	Unfolded	-0.212116	-0.141855
O04425	Flowering time control protein FCA	psself244	1	747	747	_	Arabidopsis thaliana	_	32824618;31043738	19	49	31	8.6	38.11	[7.6-9.0]; 37.33	4	12.23	[4.0-4.4]; 13.19	_	32.43	7	25.88	False	Folded	None	4.7	0.351	8.6	0.28	0.302018	0.071	_	0.279625	0.340652
O04425	Flowering time control protein FCA	psself244	1	747	747	_	Arabidopsis thaliana	_	32824618;31043738	52	113	62	7.6	63.88	[6.5-8.4]; 63.48	4	50.92	[4.0-4.3]; 51.5	_	63.51	9.8	12.96	False	Folded	None	9	0.152	4	0.132	0.133911	0.02	_	0.133955	0.13202
O04425	Flowering time control protein FCA	psself244	1	747	747	_	Arabidopsis thaliana	_	32824618;31043738	286	514	229	5.6	38.43	[4.5-6.3]; 38.14	9	31.27	[8.9-9.0]; 31.52	_	36.72	12	7.16	False	Folded	None	9	0.269	4	0.225	0.248933	0.044	_	0.235355	0.26936
O04425	Flowering time control protein FCA	psself244	1	747	747	_	Arabidopsis thaliana	_	32824618;31043738	529	568	40	4.1	50.22	[4.0-6.0]; 50.0	9	40.9	[8.9-9.0]; 41.16	_	47.53	14.5	9.32	False	Folded	None	9	0.193	4	0.156	0.167046	0.037	_	0.156293	0.192808
O04425	Flowering time control protein FCA	psself244	1	747	747	_	Arabidopsis thaliana	_	32824618;31043738	620	667	48	6.6	85.64	[6.1-7.3]; 85.13	4	70.72	[4.0-4.4]; 71.37	_	85.18	4.8	14.92	False	Folded	None	4.9	0.123	6.8	0.057	0.0574608	0.066	_	0.0572764	0.0847207
O04425	Flowering time control protein FCA	psself244	1	747	747	_	Arabidopsis thaliana	_	32824618;31043738	676	747	72	5.9	45.98	[5.4-6.5]; 45.84	9	41.85	[8.9-9.0]; 42.04	_	45.22	9.8	4.13	False	Folded	None	9	0.234	4	0.2	0.224527	0.034	_	0.212856	0.233613
O04492	Double-stranded RNA-binding protein 1 (Protein HYPONASTIC LEAVES 1) (dsRNA-binding protein 1) (AtDRB1)	psother481	1	419	419	_	Arabidopsis thaliana	Nuclear dicing body	33288888	224	266	43	7.4	60.25	[6.4-8.9]; 59.3	4	29.65	[4.0-4.2]; 30.67	_	59.94	4	30.6	False	Folded	None	4	0.295	8	0.066	0.0723399	0.229	_	0.0679317	0.295128
O04492	Double-stranded RNA-binding protein 1 (Protein HYPONASTIC LEAVES 1) (dsRNA-binding protein 1) (AtDRB1)	psother481	1	419	419	_	Arabidopsis thaliana	Nuclear dicing body	33288888	271	296	26	6.9	64.61	[6.2-7.7]; 63.49	4	31.8	[4.0-4.3]; 33.15	_	64.54	3.9	32.81	False	Folded	None	4.1	0.295	6.9	0.08	0.0805344	0.215	_	0.0802799	0.292567
O04492	Double-stranded RNA-binding protein 1 (Protein HYPONASTIC LEAVES 1) (dsRNA-binding protein 1) (AtDRB1)	psother481	1	419	419	_	Arabidopsis thaliana	Nuclear dicing body	33288888	298	350	53	6.9	59.96	[6.2-7.7]; 58.92	4	29.22	[4.0-4.3]; 30.51	_	59.86	3.9	30.74	False	Folded	None	4.1	0.306	6.9	0.098	0.0979961	0.208	_	0.0977382	0.303916
O04492	Double-stranded RNA-binding protein 1 (Protein HYPONASTIC LEAVES 1) (dsRNA-binding protein 1) (AtDRB1)	psother481	1	419	419	_	Arabidopsis thaliana	Nuclear dicing body	33288888	354	380	27	6.9	62.23	[6.2-7.7]; 61.17	4	31.51	[4.0-4.3]; 32.78	_	62.15	3.9	30.72	False	Folded	None	4.1	0.293	6.9	0.086	0.0865913	0.207	_	0.0863452	0.291058
O08816	Neural Wiskott-Aldrich syndrome protein (N-WASP)	psother22	273	501	229	_	Rattus norvegicus	Receptor cluster	25321392	273	501	229	8.6	38.57	[7.4-9.0]; 37.78	4.2	9.89	[4.0-4.5]; 10.33	_	34.27	4.4	28.68	False	Folded	None	4.3	0.367	8.5	0.249	0.262878	0.118	_	0.249245	0.364547
O13828	mRNA decapping complex subunit 2 (EC 3.-.-.-)	psother19	242	291	50	_	Schizosaccharomyces pombe	P-body	24862735;29424691	260	292	33	7	14.98	[6.1-8.4]; 14.75	4	8.02	[4.0-4.2]; 8.26	_	14.98	5.2	6.96	False	Folded	None	5.1	0.384	7.8	0.343	0.345037	0.041	_	0.345037	0.372151
O13828	mRNA decapping complex subunit 2 (EC 3.-.-.-)	psother19	1	741	741	_	Schizosaccharomyces pombe	P-body	24862735;29424691	305	335	31	5.9	31.55	[5.1-6.6]; 31.24	9	22.88	[8.9-9.0]; 23.12	_	29.87	11.4	8.67	False	Folded	None	9	0.309	4	0.23	0.27978	0.079	_	0.256786	0.308968
O13828	mRNA decapping complex subunit 2 (EC 3.-.-.-)	psother19	1	741	741	_	Schizosaccharomyces pombe	P-body	24862735;29424691	393	415	23	9	11.98	[8.2-9.0]; 11.18	4	-6.05	[4.0-4.4]; -5.26	_	6.55	5.2	18.03	False	Folded	None	5	0.391	9	0.263	0.2899	0.128	_	0.262986	0.369637
O13828	mRNA decapping complex subunit 2 (EC 3.-.-.-)	psother19	1	741	741	_	Schizosaccharomyces pombe	P-body	24862735;29424691	437	512	76	8	67.27	[6.8-8.9]; 66.95	4	57.25	[4.0-4.4]; 57.71	_	66.68	5.2	10.02	False	Folded	None	4.8	0.188	8.2	0.152	0.156621	0.036	_	0.152307	0.178533
O13828	mRNA decapping complex subunit 2 (EC 3.-.-.-)	psother19	1	741	741	_	Schizosaccharomyces pombe	P-body	24862735;29424691	522	623	102	6.6	88.95	[6.1-7.1]; 88.55	4	75.63	[4.0-9.0]; 76.21	_	88.22	5.7	13.32	False	Folded	None	5.2	0.116	6.8	0.077	0.0770377	0.039	_	0.0777355	0.0825758
O13828	mRNA decapping complex subunit 2 (EC 3.-.-.-)	psother19	1	741	741	_	Schizosaccharomyces pombe	P-body	24862735;29424691	627	721	95	6.2	110.71	[5.6-6.9]; 109.85	9	85.24	[8.9-9.0]; 86.04	_	107.65	9.8	25.47	True	U->F	7.65	9	0.067	4	-0.058	-0.0198706	0.125	_	-0.0352641	0.066923
O14641	Segment polarity protein dishevelled homolog DVL-2 (Dishevelled-2) (DSH homolog 2)	psother2	1	736	736	_	Homo sapiens	_	16263761	91	255	165	8	112.36	[7.1-8.7]; 111.74	4	94.23	[4.0-4.6]; 94.77	_	110.17	7	18.13	False	Non-confident transition	None	5.1	0.021	4	-0.016	0.0106915	0.037	_	0.000664693	-0.0161905
O14641	Segment polarity protein dishevelled homolog DVL-2 (Dishevelled-2) (DSH homolog 2)	psother2	1	736	736	_	Homo sapiens	_	16263761	554	728	175	7.9	50.39	[7.0-8.4]; 50.25	4.1	45.95	[4.0-4.6]; 46.06	_	50	8.8	4.44	False	Folded	None	9	0.225	4	0.188	0.217956	0.037	_	0.218007	0.190951
O14686	Histone-lysine N-methyltransferase 2D (Lysine N-methyltransferase 2D) (EC 2.1.1.354) (ALL1-related protein) (Myeloid/lymphoid or mixed-lineage leukemia protein 2)	psself271	3560	4270	711	_	Homo sapiens	_	33169020	3560	3836	277	4	58.74	[4.0-5.8]; 58.43	9	45.91	[8.8-9.0]; 46.42	_	53.25	11.8	12.83	False	Folded	None	9	0.223	4	0.153	0.195406	0.07	_	0.15253	0.223335
O14686	Histone-lysine N-methyltransferase 2D (Lysine N-methyltransferase 2D) (EC 2.1.1.354) (ALL1-related protein) (Myeloid/lymphoid or mixed-lineage leukemia protein 2)	psself271	3560	4270	711	_	Homo sapiens	_	33169020	3838	3897	60	4	66.75	[4.0-5.3]; 66.31	9	52.95	[8.4-9.0]; 53.66	_	57.63	13.6	13.8	False	Folded	None	9	0.17	4	0.062	0.148718	0.108	_	0.0616489	0.170296
O14686	Histone-lysine N-methyltransferase 2D (Lysine N-methyltransferase 2D) (EC 2.1.1.354) (ALL1-related protein) (Myeloid/lymphoid or mixed-lineage leukemia protein 2)	psself271	3560	4270	711	_	Homo sapiens	_	33169020	3988	4194	207	7.3	30.49	[6.5-8.3]; 30.28	4.4	24.29	[4.0-5.0]; 24.44	_	30.44	5.2	6.2	False	Folded	None	5.2	0.317	7.5	0.285	0.285804	0.032	_	0.285016	0.310756
O14686	Histone-lysine N-methyltransferase 2D (Lysine N-methyltransferase 2D) (EC 2.1.1.354) (ALL1-related protein) (Myeloid/lymphoid or mixed-lineage leukemia protein 2)	psself271	3560	4270	711	_	Homo sapiens	_	33169020	4199	4271	73	5.5	31.24	[4.0-6.3]; 31.02	9	25.86	[8.9-9.0]; 26.04	_	29.95	11.4	5.38	False	Folded	None	9	0.267	4	0.233	0.251313	0.034	_	0.239726	0.266659
O14979	Heterogeneous nuclear ribonucleoprotein D-like (hnRNP D-like) (hnRNP DL) (AU-rich element RNA-binding factor) (JKT41-binding protein) (Protein laAUF1)	psself186	1	420	420	_	Homo sapiens	_	31995753	1	92	92	5.1	74.33	[4.0-6.0]; 74.0	9	61.04	[8.9-9.0]; 61.6	_	70.46	13.3	13.29	True	U->F	6.75	9	0.043	4	-0.051	0.00502064	0.094	_	-0.0409922	0.0433152
O14979	Heterogeneous nuclear ribonucleoprotein D-like (hnRNP D-like) (hnRNP DL) (AU-rich element RNA-binding factor) (JKT41-binding protein) (Protein laAUF1)	psself186	1	420	420	_	Homo sapiens	_	31995753	97	123	27	8.6	89.89	[7.7-9.0]; 89.1	4	62.54	[4.0-4.4]; 63.7	_	83.51	10.5	27.35	False	Folded	None	4.8	0.111	8.6	0.079	0.098748	0.032	_	0.0791249	0.0959669
O14979	Heterogeneous nuclear ribonucleoprotein D-like (hnRNP D-like) (hnRNP DL) (AU-rich element RNA-binding factor) (JKT41-binding protein) (Protein laAUF1)	psself186	1	420	420	_	Homo sapiens	_	31995753	309	347	39	5.7	125.11	[4.0-6.7]; 124.34	9	106.49	[8.9-9.0]; 107.16	_	122.18	12.8	18.62	False	Unfolded	None	9	-0.149	4	-0.227	-0.205398	0.078	_	-0.216616	-0.149267
O14979	Heterogeneous nuclear ribonucleoprotein D-like (hnRNP D-like) (hnRNP DL) (AU-rich element RNA-binding factor) (JKT41-binding protein) (Protein laAUF1)	psself186	1	420	420	_	Homo sapiens	_	31995753	398	420	23	4	94.64	[4.0-5.5]; 94.16	9	75.86	[8.7-9.0]; 76.79	_	85.98	10.1	18.78	True	U->F	6.45	9	0.061	4	-0.05	0.0191875	0.111	_	-0.0496843	0.0610549
O15169	Axin-1 (Axis inhibition protein 1) (hAxin)	psother4	1	862	862	_	Homo sapiens	_	16263762;29424691	9	34	26	9	56.28	[7.6-9.0]; 53.91	4	-6.12	[4.0-4.4]; -3.32	_	44.7	3.3	62.4	False	Folded	None	4	0.364	9	0.031	0.0704415	0.333	_	0.031323	0.364291
O15169	Axin-1 (Axis inhibition protein 1) (hAxin)	psother4	1	862	862	_	Homo sapiens	_	16263762;29424691	245	275	31	8.7	114.73	[7.5-9.0]; 112.44	4	38.98	[4.0-4.3]; 42.0	_	101.93	3.8	75.75	True	F->U	5.15	4	0.206	8.8	-0.213	-0.161487	0.419	_	-0.213004	0.206261
O15169	Axin-1 (Axis inhibition protein 1) (hAxin)	psother4	1	862	862	_	Homo sapiens	_	16263762;29424691	308	382	75	8.2	83.58	[7.2-8.9]; 82.9	4	63.52	[4.0-4.4]; 64.38	_	81.17	9.6	20.06	False	Folded	None	4.8	0.106	8.3	0.078	0.0869693	0.028	_	0.0775553	0.0889185
O15169	Axin-1 (Axis inhibition protein 1) (hAxin)	psother4	1	862	862	_	Homo sapiens	_	16263762;29424691	392	450	59	7.2	98.59	[6.5-8.2]; 97.85	4	73.32	[4.0-4.3]; 74.17	_	98.42	6.6	25.27	False	Non-confident transition	None	5.1	0.039	7.6	-0.017	-0.0117252	0.056	_	-0.0150986	-0.0089812
O15169	Axin-1 (Axis inhibition protein 1) (hAxin)	psother4	1	862	862	_	Homo sapiens	_	16263762;29424691	455	731	277	5.5	107.84	[4.7-6.1]; 107.1	9	88.79	[8.8-9.0]; 89.73	_	100.58	9.6	19.05	True	U->F	6.25	9	0.075	4	-0.08	0.0276913	0.155	_	-0.0342608	0.0746045
O16810	Origin recognition complex subunit 1 (DmORC1)	psother274	1	924	924	_	Drosophila melanogaster	_	31560342	194	240	47	6.5	174.7	[5.8-7.3]; 174.21	9	159.97	[4.0-9.0]; 160.61	_	174.19	12.2	14.73	False	Unfolded	None	9	-0.291	4	-0.402	-0.350341	0.111	_	-0.359671	-0.291434
O16810	Origin recognition complex subunit 1 (DmORC1)	psother274	1	924	924	_	Drosophila melanogaster	_	31560342	281	324	44	6.6	79.64	[6.0-7.2]; 79.25	9	67.14	[8.9-9.0]; 67.66	_	79.12	10.5	12.5	False	Folded	None	9	0.106	4	0.031	0.0481662	0.075	_	0.0436517	0.106319
O16810	Origin recognition complex subunit 1 (DmORC1)	psother274	1	924	924	_	Drosophila melanogaster	_	31560342	331	360	30	6.9	67.27	[6.1-7.9]; 66.72	4	51.18	[4.0-4.2]; 51.78	_	67.23	8.8	16.09	False	Folded	None	9	0.155	6.9	0.123	0.123617	0.032	_	0.123499	0.134766
O16810	Origin recognition complex subunit 1 (DmORC1)	psother274	1	924	924	_	Drosophila melanogaster	_	31560342	363	451	89	6.7	89.43	[6.0-7.3]; 89.04	4	77.62	[4.0-4.3]; 78.04	_	89.14	9.8	11.81	False	Folded	None	9	0.093	4	0.011	0.0457505	0.082	_	0.0423734	0.0107427
O16810	Origin recognition complex subunit 1 (DmORC1)	psother274	1	924	924	_	Drosophila melanogaster	_	31560342	454	553	100	6.3	105	[5.6-7.0]; 104.31	9	86.54	[8.9-9.0]; 87.21	_	103.22	10.1	18.46	True	U->F	8.15	9	0.037	4	-0.047	-0.0304731	0.084	_	-0.0388378	0.036964
O35613	Death domain-associated protein 6 (Daxx)	psother226	1	740	740	_	Mus musculus	_	31434890	3	56	54	9	83.91	[8.1-9.0]; 80.98	4	16.25	[4.0-4.4]; 19.24	_	64.06	2.8	67.66	False	Non-confident transition	None	4	0.269	9	-0.015	0.0454721	0.284	_	-0.0150813	0.268606
O35613	Death domain-associated protein 6 (Daxx)	psother226	1	740	740	_	Mus musculus	_	31434890	154	190	37	8.5	91.57	[7.1-9.0]; 90.75	4	59.69	[4.0-4.3]; 60.86	_	88.17	3.9	31.88	False	Folded	None	4	0.217	8.6	0.02	0.0352922	0.197	_	0.0204186	0.216659
O35613	Death domain-associated protein 6 (Daxx)	psother226	1	740	740	_	Mus musculus	_	31434890	351	371	21	8.4	117.75	[7.5-9.0]; 116.46	4	78.41	[4.0-4.4]; 79.98	_	110.21	12.4	39.34	False	Unfolded	None	4.7	-0.032	8.3	-0.127	-0.100806	0.095	_	-0.126877	-0.0480241
O35613	Death domain-associated protein 6 (Daxx)	psother226	1	740	740	_	Mus musculus	_	31434890	378	638	261	8.5	147.26	[7.0-9.0]; 145.32	4	70.9	[4.0-4.2]; 74.25	_	140.42	3.8	76.36	True	F->U	4.65	4	0.137	8.6	-0.251	-0.223484	0.388	_	-0.251269	0.136852
O35613	Death domain-associated protein 6 (Daxx)	psother226	1	740	740	_	Mus musculus	_	31434890	643	694	52	8.8	51.2	[7.5-9.0]; 50.51	4	28.73	[4.0-4.3]; 29.56	_	47.44	4.2	22.47	False	Folded	None	4.1	0.317	8.9	0.189	0.205794	0.128	_	0.189207	0.315968
O43561	Linker for activation of T-cells family member 1 (36 kDa phospho-tyrosine adapter protein) (pp36) (p36-38)	psother151	1	262	262	_	Homo sapiens	Receptor cluster	30846600	75	116	42	8.7	92.37	[7.7-9.0]; 91.49	4	61.21	[4.0-4.5]; 62.66	_	85.24	5.2	31.16	False	Folded	None	4.9	0.118	8.6	0.025	0.0507175	0.093	_	0.025102	0.101016
O43561	Linker for activation of T-cells family member 1 (36 kDa phospho-tyrosine adapter protein) (pp36) (p36-38)	psother151	1	262	262	_	Homo sapiens	Receptor cluster	30846600	137	262	126	9	91.86	[7.6-9.0]; 89.32	4	25.51	[4.0-4.3]; 28.45	_	80.48	3.3	66.35	True	F->U	6.15	4	0.259	9	-0.087	-0.0452504	0.346	_	-0.086865	0.259023
O43561	Linker for activation of T-cells family member 1 (36 kDa phospho-tyrosine adapter protein) (pp36) (p36-38)	psother183	48	233	186	_	Homo sapiens	Receptor cluster	31268421	55	117	63	8.6	43.06	[7.7-9.0]; 42.53	4	25.38	[4.0-4.5]; 26.17	_	38.73	6.6	17.68	False	Folded	None	6	0.272	8.6	0.227	0.24524	0.045	_	0.226651	0.258667
O43561	Linker for activation of T-cells family member 1 (36 kDa phospho-tyrosine adapter protein) (pp36) (p36-38)	psother183	48	233	186	_	Homo sapiens	Receptor cluster	31268421	136	190	55	9	63.83	[8.1-9.0]; 61.5	4	2.8	[4.0-4.4]; 5.63	_	47.31	3.3	61.03	False	Folded	None	4	0.338	9	0.018	0.0830236	0.32	_	0.0181502	0.337989
O43561	Linker for activation of T-cells family member 1 (36 kDa phospho-tyrosine adapter protein) (pp36) (p36-38)	psother183	48	233	186	_	Homo sapiens	Receptor cluster	31268421	192	234	43	8.8	86.78	[7.2-9.0]; 85.32	4	39.2	[4.0-4.3]; 41.14	_	80.92	3.7	47.58	True	F->U	6.05	4	0.23	8.9	-0.078	-0.0509703	0.308	_	-0.0783141	0.230131
O43660	Pleiotropic regulator 1	psother574	1	514	514	_	Homo sapiens	Nuclear speckle	33731873	26	83	58	6	93.8	[5.3-6.7]; 92.91	9	70.65	[8.9-9.0]; 71.28	_	89.67	9.4	23.15	True	U->F	4.85	9	0.139	4	-0.03	0.0560656	0.169	_	0.0184901	0.139033
O43660	Pleiotropic regulator 1	psother574	1	514	514	_	Homo sapiens	Nuclear speckle	33731873	103	169	67	7.9	53.38	[6.8-8.7]; 52.98	4	40.35	[4.0-4.3]; 40.8	_	52.64	7	13.03	False	Folded	None	4.9	0.215	4	0.2	0.204888	0.015	_	0.20375	0.200021
O43663	Protein regulator of cytokinesis 1	psother439	1	620	620	_	Homo sapiens	Polycomb body	33053359	440	500	61	5.9	124.28	[4.9-6.7]; 123.08	9	91.81	[8.9-9.0]; 92.72	_	118.91	11.8	32.47	False	Unfolded	None	9	-0.054	4	-0.204	-0.155041	0.15	_	-0.176958	-0.0540622
O43663	Protein regulator of cytokinesis 1	psother439	1	620	620	_	Homo sapiens	Polycomb body	33053359	509	563	55	5.3	68.8	[4.0-6.2]; 68.16	9	46.86	[8.8-9.0]; 47.81	_	62.22	10.3	21.94	False	Non-confident transition	None	9	0.136	4	-0.009	0.0655347	0.145	_	0.0106183	0.136251
O43663	Protein regulator of cytokinesis 1	psother439	1	620	620	_	Homo sapiens	Polycomb body	33053359	587	620	34	7.2	79.15	[6.3-8.3]; 78.77	4	66.61	[4.0-4.2]; 67.01	_	79.11	7	12.54	False	Folded	None	4.7	0.133	6.9	0.113	0.113382	0.02	_	0.113644	0.122598
O43670	BUB3-interacting and GLEBS motif-containing protein ZNF207 (BuGZ) (hBuGZ) (Zinc finger protein 207)	psother38	1	478	478	_	Homo sapiens	Spindle apparatus	26388440	76	478	403	6.7	13.45	[5.9-7.5]; 13.33	9	10.08	[9.0-9.0]; 10.08	_	13.38	8.8	3.37	False	Folded	None	9	0.373	4	0.352	0.359653	0.021	_	0.359205	0.372531
O43781	Dual specificity tyrosine-phosphorylation-regulated kinase 3 (EC 2.7.12.1) (Regulatory erythroid kinase) (REDK)	psother109	1	588	588	_	Homo sapiens	Spindle apparatus;Stress granule;Centrosome	29973724	1	32	32	8	66.28	[7.1-8.6]; 65.84	4	53.94	[4.0-4.3]; 54.48	_	64.92	12	12.34	False	Folded	None	4.5	0.108	7.9	0.081	0.0845319	0.027	_	0.0807989	0.104232
O43781	Dual specificity tyrosine-phosphorylation-regulated kinase 3 (EC 2.7.12.1) (Regulatory erythroid kinase) (REDK)	psother109	1	588	588	_	Homo sapiens	Spindle apparatus;Stress granule;Centrosome	29973724	46	78	33	8.5	41.25	[7.4-9.0]; 40.79	4	26.65	[4.0-4.3]; 27.16	_	38.83	6.6	14.6	False	Folded	None	6	0.285	8.5	0.234	0.248858	0.051	_	0.234334	0.249742
O43781	Dual specificity tyrosine-phosphorylation-regulated kinase 3 (EC 2.7.12.1) (Regulatory erythroid kinase) (REDK)	psother109	1	588	588	_	Homo sapiens	Spindle apparatus;Stress granule;Centrosome	29973724	88	113	26	7.3	77.55	[6.4-8.5]; 76.81	4	52.92	[4.0-4.3]; 53.97	_	77.35	4.5	24.63	False	Folded	None	4.5	0.214	7.4	0.103	0.104094	0.111	_	0.103102	0.196265
O43823	A-kinase anchor protein 8 (AKAP-8) (A-kinase anchor protein 95 kDa) (AKAP 95)	psself287	101	210	110	_	Homo sapiens	_	33235917;32719551	101	128	28	8.1	106.86	[6.9-9.0]; 105.81	4	73.54	[4.0-4.4]; 75.01	_	104.51	4.6	33.32	True	F->U	6.45	4.6	0.114	8.1	-0.024	-0.013862	0.138	_	-0.0243679	0.0861384
O43823	A-kinase anchor protein 8 (AKAP-8) (A-kinase anchor protein 95 kDa) (AKAP 95)	psself287	101	210	110	_	Homo sapiens	_	33235917;32719551	165	211	47	8.5	91.72	[7.6-9.0]; 90.73	4	58.21	[4.0-4.5]; 59.74	_	84.64	10.5	33.51	False	Folded	None	4.7	0.095	8.4	0.009	0.0336875	0.086	_	0.0091046	0.0803315
O44490	Mammalian ELKS/CAST/ERC/Rab6 interacting protein homolog	psself278	300	449	150	_	Caenorhabditis elegans	Presynaptic active zone condensate	33208945	300	450	151	7.3	122.98	[6.5-8.3]; 122.17	4	97.06	[4.0-4.6]; 98.06	_	122.67	5.2	25.92	Possible Multitransition	Variable	[4.249999999999999; 5.5499999999999945]	4.9	0.022	7.4	-0.059	-0.0570323	0.081	_	-0.0590607	-0.0164939
O44490	Mammalian ELKS/CAST/ERC/Rab6 interacting protein homolog	psself278	716	836	121	_	Caenorhabditis elegans	Presynaptic active zone condensate	33208945	810	834	25	9	66.85	[8.4-9.0]; 64.69	4	15.69	[4.0-4.4]; 17.81	_	46.38	4.4	51.16	False	Folded	None	4.1	0.366	9	0.041	0.122564	0.325	_	0.0409739	0.362054
O55017	Voltage-dependent N-type calcium channel subunit alpha-1B (Brain calcium channel III) (BIII) (Calcium channel; L type; alpha-1 polypeptide isoform 5) (Voltage-gated calcium channel subunit alpha Cav2.2)	psother460	2151	2327	177	_	Mus musculus	Presynaptic active zone condensate	33202250	2151	2293	143	7.6	60.88	[6.6-8.3]; 60.7	4	54.84	[4.0-4.5]; 55.06	_	60.68	10.1	6.04	False	Folded	None	9	0.186	4	0.154	0.174882	0.032	_	0.175289	0.153606
O60500	Nephrin (Renal glomerulus-specific cell adhesion receptor)	psother467	1	1241	1241	_	Homo sapiens	Receptor cluster	33218630;26553976	1025	1058	34	8.6	48.09	[6.9-9.0]; 47.31	4	19.51	[4.0-4.3]; 20.83	_	45.64	3.8	28.58	False	Folded	None	4	0.34	9	0.13	0.146932	0.21	_	0.13092	0.340469
O60500	Nephrin (Renal glomerulus-specific cell adhesion receptor)	psother467	1	1241	1241	_	Homo sapiens	Receptor cluster	33218630;26553976	1096	1138	43	8.2	141.39	[6.8-9.0]; 139.93	4	79.77	[4.0-4.3]; 82.26	_	137.3	3.7	61.62	True	F->U	4.45	4	0.088	8.3	-0.292	-0.274129	0.38	_	-0.292113	0.0883765
O60563	Cyclin-T1 (CycT1) (Cyclin-T)	psself93	401	630	230	pH 7.5	Homo sapiens	Nuclear speckle	29849146	418	629	212	5.2	106.5	[4.0-5.9]; 105.53	9	76.95	[8.7-9.0]; 78.42	Middle	93.07	9.8	29.55	True	U->F	6.35	9	0.107	4	-0.099	0.0397063	0.206	Folded	-0.0669857	0.107288
O60563	Cyclin-T1 (CycT1) (Cyclin-T)	psself93	462	654	193	pH 7.5	Homo sapiens	Nuclear speckle	29849146	462	655	194	5.1	113.92	[4.0-5.8]; 113.12	9	81.3	[8.7-9.0]; 82.84	Middle	98.58	10.1	32.62	True	U->F	7.05	9	0.071	4	-0.15	-0.00204767	0.221	Folded	-0.124762	0.0708837
O60885	Bromodomain-containing protein 4 (Protein HUNK1)	psself195	44	477	434	pH 7.5	Homo sapiens	_	32203489	169	351	183	5.6	41.93	[4.5-6.4]; 41.22	9	24.6	[8.9-9.0]; 25.05	Middle	37.63	10.5	17.33	False	Folded	None	9	0.282	4	0.19	0.231804	0.092	Folded	0.205885	0.28182
O60885	Bromodomain-containing protein 4 (Protein HUNK1)	psself195	347	720	374	pH 7.5	Homo sapiens	_	32203489	460	660	201	6.3	117.06	[5.7-6.9]; 116.24	9	92.27	[8.9-9.0]; 92.95	Middle	114.45	7	24.79	True	U->F	7.35	9	0.067	4	-0.062	-0.0129245	0.129	Folded	-0.0260559	0.0671076
O60885	Bromodomain-containing protein 4 (Protein HUNK1)	psself195	1	719	719	pH 7.5	Homo sapiens	_	32203489	681	720	40	7.7	132.07	[6.5-9.0]; 130.86	4	85.04	[4.0-4.3]; 87.28	10% maximum solubility	130.82	3.7	47.03	True	F->U	4.35	4	0.055	7.5	-0.224	-0.221843	0.279	Unfolded	-0.223926	0.0551203
O60885	Bromodomain-containing protein 4 (Protein HUNK1)	psself195	347	720	374	pH 7.5	Homo sapiens	_	32203489	681	721	41	7.7	127.85	[6.5-9.0]; 126.67	4	81.56	[4.0-4.3]; 83.78	10% maximum solubility	126.61	3.7	46.29	True	F->U	4.35	4	0.066	7.5	-0.209	-0.206784	0.275	Unfolded	-0.20909	0.0657609
O60885	Bromodomain-containing protein 4 (Protein HUNK1)	psself95	1	1362	1362	pH 7.5	Homo sapiens	Nuclear speckle	29930091	1	60	60	6.9	60.39	[6.2-7.7]; 60.07	4	51.71	[4.0-4.3]; 52.01	10% maximum solubility	60.37	10.1	8.68	False	Folded	None	5	0.212	7.1	0.197	0.197124	0.015	Folded	0.197284	0.197903
O60885	Bromodomain-containing protein 4 (Protein HUNK1)	psself95	1	1362	1362	pH 7.5	Homo sapiens	Nuclear speckle	29930091	169	351	183	5.6	41.93	[4.5-6.4]; 41.22	9	24.6	[8.9-9.0]; 25.05	Middle	37.63	10.5	17.33	False	Folded	None	9	0.282	4	0.19	0.231804	0.092	Folded	0.205885	0.28182
O60885	Bromodomain-containing protein 4 (Protein HUNK1)	psself95	1	1362	1362	pH 7.5	Homo sapiens	Nuclear speckle	29930091	460	1351	892	5.6	89.79	[4.9-6.2]; 89.0	9	66.93	[8.8-9.0]; 68.03	Middle	82	9.4	22.86	False	Folded	None	9	0.176	4	0.063	0.123546	0.113	Folded	0.0958694	0.176062
O62011	MUTator	psother115	1	1054	1054	_	Caenorhabditis elegans	Mutator foci	30036386	1	68	68	9	120.1	[8.1-9.0]; 116.85	4	33.16	[4.0-4.4]; 37.27	_	97	3.3	86.94	True	F->U	5.25	4	0.193	9	-0.224	-0.145012	0.417	_	-0.223564	0.193357
O62011	MUTator	psother115	1	1054	1054	_	Caenorhabditis elegans	Mutator foci	30036386	76	100	25	9	58.32	[8.2-9.0]; 55.51	4	-13.87	[4.0-4.4]; -10.89	_	37.54	1.8	72.19	True	F->U	7.75	4	0.329	9	-0.041	0.0386995	0.37	_	-0.0414848	0.32912
O62011	MUTator	psother115	1	1054	1054	_	Caenorhabditis elegans	Mutator foci	30036386	215	237	23	6.4	170.64	[5.8-7.0]; 169.69	9	141.68	[8.9-9.0]; 142.61	_	168.05	9.6	28.96	False	Unfolded	None	9	-0.126	4	-0.321	-0.234873	0.195	_	-0.254695	-0.12604
O62011	MUTator	psother115	1	1054	1054	_	Caenorhabditis elegans	Mutator foci	30036386	368	969	602	5.5	79.95	[4.7-5.9]; 79.6	9	70.69	[8.9-9.0]; 71.0	_	75.53	9.6	9.26	False	Folded	None	9	0.154	4	0.1	0.137383	0.054	_	0.11799	0.153965
O62275	Argonaute protein wago-4 (Worm-specific argonaute protein 4)	psother100	1	965	965	_	Caenorhabditis elegans	P granule	29769721	4	34	31	4	-29.75	[4.0-5.2]; -29.89	9	-34.29	[8.7-9.0]; -34.09	_	-32.88	11.4	4.54	False	Folded	None	9	0.497	4	0.449	0.488264	0.048	_	0.449334	0.49651
O65934	ABC transporter ATP-binding/permease protein Rv1747 (EC 7.-.-.-)	psself155	1	310	310	_	Mycobacterium tuberculosis	_	31366629	94	236	143	7.9	31.35	[7.0-8.5]; 31.11	4	25.03	[4.0-4.5]; 25.25	_	30.73	12.2	6.32	False	Folded	None	9	0.268	4	0.257	0.25894	0.011	_	0.258135	0.256793
O65934	ABC transporter ATP-binding/permease protein Rv1747 (EC 7.-.-.-)	psself155	1	310	310	_	Mycobacterium tuberculosis	_	31366629	251	271	21	8.5	61.61	[7.5-9.0]; 60.98	4	41.95	[4.0-4.4]; 42.85	_	57.87	10.5	19.66	False	Folded	None	6.7	0.179	4	0.15	0.178522	0.029	_	0.169442	0.149546
O75334	Liprin-alpha-2 (Protein tyrosine phosphatase receptor type f polypeptide-interacting protein alpha-2) (PTPRF-interacting protein alpha-2)	psother578	24	542	519	_	Homo sapiens	Presynaptic active zone condensate	33761347	227	275	49	7.2	125.14	[6.4-8.5]; 124.0	4	89.4	[4.0-4.4]; 90.79	_	124.95	4.3	35.74	True	F->U	4.85	4.4	0.062	7.3	-0.161	-0.159144	0.223	_	-0.160715	0.0294553
O75334	Liprin-alpha-2 (Protein tyrosine phosphatase receptor type f polypeptide-interacting protein alpha-2) (PTPRF-interacting protein alpha-2)	psother578	24	542	519	_	Homo sapiens	Presynaptic active zone condensate	33761347	293	473	181	7.2	137.94	[6.5-8.1]; 136.94	4	107.9	[4.0-4.8]; 108.68	_	137.84	5.2	30.04	False	Unfolded	None	5	-0.006	7.2	-0.122	-0.120935	0.116	_	-0.121645	-0.0616917
O75334	Liprin-alpha-2 (Protein tyrosine phosphatase receptor type f polypeptide-interacting protein alpha-2) (PTPRF-interacting protein alpha-2)	psother578	24	542	519	_	Homo sapiens	Presynaptic active zone condensate	33761347	501	521	21	7.2	156.7	[6.3-8.3]; 154.92	4	106.8	[4.0-4.3]; 108.62	_	156.57	4.5	49.9	False	Unfolded	None	4.6	-0.031	7.3	-0.318	-0.315515	0.287	_	-0.317825	-0.0908421
O75533	Splicing factor 3B subunit 1 (Pre-mRNA-splicing factor SF3b 155 kDa subunit) (SF3b155) (Spliceosome-associated protein 155) (SAP 155)	psother189	1	1304	1304	_	Homo sapiens	Nuclear speckle	31271494	95	413	319	7	81.35	[6.2-7.8]; 81.1	4.3	73.5	[4.0-4.7]; 73.66	_	81.35	8.8	7.85	False	Folded	None	9	0.131	4	0.089	0.10857	0.042	_	0.10857	0.102824
O75533	Splicing factor 3B subunit 1 (Pre-mRNA-splicing factor SF3b 155 kDa subunit) (SF3b155) (Spliceosome-associated protein 155) (SAP 155)	psother189	1	1304	1304	_	Homo sapiens	Nuclear speckle	31271494	423	464	42	6.7	54.19	[5.9-7.7]; 53.96	4	46.81	[4.0-4.2]; 47.12	_	54.09	11.4	7.38	False	Folded	None	9	0.203	4	0.165	0.182994	0.038	_	0.181176	0.16521
O75683	Surfeit locus protein 6	psother139	1	182	182	_	Homo sapiens	Nucleolus	30498217	16	183	168	6.1	151.92	[5.3-6.8]; 150.71	9	117.75	[8.9-9.0]; 118.78	_	147.37	10.5	34.17	False	Unfolded	None	9	-0.108	4	-0.296	-0.226724	0.188	_	-0.251383	-0.108123
O75683	Surfeit locus protein 6	psother40	299	326	28	_	Homo sapiens	Nucleolus	26836305	299	327	29	6.7	205.17	[5.9-7.5]; 204.48	9	184.56	[9.0-9.0]; 184.56	_	204.85	12.9	20.61	False	Unfolded	None	9	-0.552	4	-0.632	-0.628054	0.08	_	-0.629365	-0.552106
O75928	E3 SUMO-protein ligase PIAS2 (EC 2.3.2.-) (Androgen receptor-interacting protein 3) (ARIP3) (DAB2-interacting protein) (DIP) (E3 SUMO-protein transferase PIAS2) (Msx-interacting zinc finger protein) (Miz1) (PIAS-NY protein) (Protein inhibitor of activated STAT x) (Protein inhibitor of activated STAT2)	psother441	1	621	621	_	Homo sapiens	PML nuclear body	33068409;31171703	579	609	31	7.6	98.76	[6.4-8.6]; 98.58	4	92.37	[4.0-4.3]; 92.65	_	98.67	6.6	6.39	False	Non-confident transition	None	6	0.035	4	-0.012	0.0075301	0.047	_	0.00309671	-0.0121958
O82804	Protein EARLY FLOWERING 3 (Nematode-responsive protein)	psself257	388	625	238	_	Arabidopsis thaliana	Nuclear speckle	33065019;32848244	399	447	49	5.9	93.56	[5.4-6.4]; 93.25	9	83.35	[8.9-9.0]; 83.66	_	91.03	8.8	10.21	True	U->F	5.75	9	0.08	4	-0.04	0.0468001	0.12	_	0.00548343	0.0796882
O82804	Protein EARLY FLOWERING 3 (Nematode-responsive protein)	psself257	388	625	238	_	Arabidopsis thaliana	Nuclear speckle	33065019;32848244	510	530	21	4	-56.99	[4.0-5.1]; -57.16	9	-61.98	[7.2-9.0]; -61.87	_	-61.35	7.9	4.99	False	Folded	None	9	0.64	4	0.577	0.633867	0.063	_	0.576996	0.640237
O82804	Protein EARLY FLOWERING 3 (Nematode-responsive protein)	psself257	388	625	238	_	Arabidopsis thaliana	Nuclear speckle	33065019;32848244	537	626	90	6.9	79.23	[6.1-7.8]; 79.01	4	73.1	[4.0-4.3]; 73.32	_	79.22	9.6	6.13	False	Folded	None	9	0.109	4	0.076	0.0904937	0.033	_	0.0901588	0.0764576
O88602	Voltage-dependent calcium channel gamma-2 subunit (Neuronal voltage-gated calcium channel gamma-2 subunit) (Stargazin) (Transmembrane AMPAR regulatory protein gamma-2) (TARP gamma-2)	psother255	203	323	121	_	Mus musculus	Postsynaptic density	31492534	228	260	33	6.3	142.44	[5.5-7.5]; 142.05	9	131.16	[9.0-9.0]; 131.16	_	142.08	12	11.28	False	Unfolded	None	9	-0.248	4	-0.311	-0.28429	0.063	_	-0.290513	-0.248088
O88602	Voltage-dependent calcium channel gamma-2 subunit (Neuronal voltage-gated calcium channel gamma-2 subunit) (Stargazin) (Transmembrane AMPAR regulatory protein gamma-2) (TARP gamma-2)	psother255	203	323	121	_	Mus musculus	Postsynaptic density	31492534	279	304	26	8.6	49.06	[7.7-9.0]; 48.65	4	35.51	[4.0-4.3]; 36.15	_	45.98	7.4	13.55	False	Folded	None	7.1	0.225	4	0.205	0.225473	0.02	_	0.221612	0.205301
O88935	Synapsin-1 (Synapsin I)	psself276	110	657	548	_	Mus musculus	Presynaptic active zone condensate	33202250	405	658	254	5.2	48.84	[4.0-6.1]; 48.67	9	41.18	[8.9-9.0]; 41.46	_	46.68	13.1	7.66	False	Folded	None	9	0.212	4	0.173	0.190604	0.039	_	0.176127	0.212158
O94752	Enhancer of mRNA-decapping protein 3	psother20	1	454	454	pH 7.3	Schizosaccharomyces pombe	P-body	24862735;29424691	59	84	26	5.6	98.9	[4.2-6.4]; 97.19	9	54.47	[8.8-9.0]; 56.21	Middle	88.15	10.2	44.43	True	U->F	7.25	9	0.115	4	-0.083	-0.0135417	0.198	Transition!	-0.0564239	0.115221
O94752	Enhancer of mRNA-decapping protein 3	psother20	1	454	454	pH 7.3	Schizosaccharomyces pombe	P-body	24862735;29424691	125	147	23	4	115.03	[4.0-5.5]; 113.58	9	59.89	[8.7-9.0]; 62.12	Middle	88.35	11.4	55.14	True	U->F	8.15	9	0.044	4	-0.275	-0.0689985	0.319	Unfolded	-0.275405	0.044393
O94752	Enhancer of mRNA-decapping protein 3	psother20	1	454	454	pH 7.3	Schizosaccharomyces pombe	P-body	24862735;29424691	172	195	24	5	145.55	[4.0-6.1]; 144.4	9	87.51	[8.8-9.0]; 89.6	Middle	126.47	11.4	58.04	False	Unfolded	None	9	-0.094	4	-0.375	-0.247322	0.281	Unfolded	-0.356243	-0.0944041
O94986	Centrosomal protein of 152 kDa (Cep152)	psother563	1	1710	1710	_	Homo sapiens	_	33658185	5	91	87	9	117.44	[7.7-9.0]; 114.67	4	42.73	[4.0-4.3]; 45.9	_	103.78	3.5	74.71	True	F->U	4.95	4	0.184	9	-0.25	-0.193571	0.434	_	-0.249585	0.183568
O94986	Centrosomal protein of 152 kDa (Cep152)	psother563	1	1710	1710	_	Homo sapiens	_	33658185	103	168	66	7.6	92.25	[6.5-8.9]; 91.32	4	62.3	[4.0-4.5]; 63.66	_	91.57	4.6	29.95	False	Non-confident transition	None	4.6	0.173	7.9	-0.003	0.00382213	0.176	_	-0.00235617	0.14017
O94986	Centrosomal protein of 152 kDa (Cep152)	psother563	1	1710	1710	_	Homo sapiens	_	33658185	195	218	24	8	53.53	[6.6-9.0]; 53.13	4	37.46	[4.0-4.2]; 37.99	_	52.96	3.9	16.07	False	Folded	None	4	0.283	7.4	0.195	0.195638	0.088	_	0.195711	0.283016
O94986	Centrosomal protein of 152 kDa (Cep152)	psother563	1	1710	1710	_	Homo sapiens	_	33658185	585	612	28	6.5	131.14	[6.0-7.2]; 130.03	4	98.72	[4.0-4.2]; 99.73	_	129.55	4.8	32.42	False	Unfolded	None	4.9	0	6.5	-0.098	-0.0908626	0.098	_	-0.0981784	-0.0519012
O94986	Centrosomal protein of 152 kDa (Cep152)	psother563	1	1710	1710	_	Homo sapiens	_	33658185	1115	1152	38	7.3	73.51	[6.2-8.5]; 73.17	4	62.8	[4.0-4.2]; 63.19	_	73.46	6.6	10.71	False	Folded	None	6	0.148	4	0.113	0.123578	0.035	_	0.120951	0.112801
O95613	Pericentrin (Kendrin) (Pericentrin-B)	psother110	1	3336	3336	_	Homo sapiens	Centrosome	29973724	1	64	64	6.3	149.71	[5.7-7.0]; 148.87	9	124.92	[8.9-9.0]; 125.78	_	147.36	9.8	24.79	False	Unfolded	None	9	-0.109	4	-0.285	-0.208382	0.176	_	-0.22956	-0.109272
O95613	Pericentrin (Kendrin) (Pericentrin-B)	psother110	1	3336	3336	_	Homo sapiens	Centrosome	29973724	67	215	149	8.8	83.05	[7.5-9.0]; 81.6	4	38.26	[4.0-4.5]; 39.36	_	75.46	4.4	44.79	False	Folded	None	4.3	0.265	8.9	0.015	0.0495281	0.25	_	0.0150353	0.248534
O95613	Pericentrin (Kendrin) (Pericentrin-B)	psother110	1	3336	3336	_	Homo sapiens	Centrosome	29973724	221	243	23	9	106.2	[7.8-9.0]; 104.46	4	55.13	[4.0-4.4]; 57.23	_	95.61	4.2	51.07	True	F->U	5.75	4.2	0.191	9	-0.151	-0.105431	0.342	_	-0.151417	0.176091
O95613	Pericentrin (Kendrin) (Pericentrin-B)	psother110	1	3336	3336	_	Homo sapiens	Centrosome	29973724	261	283	23	6.9	105.96	[6.2-7.7]; 104.71	4	71.67	[4.0-4.3]; 72.82	_	105.87	4.3	34.29	Possible Multitransition	Variable	[5.649999999999994; 8.749999999999982]	4.4	0.146	6.9	-0.042	-0.0414208	0.188	_	-0.0417298	0.111208
O95613	Pericentrin (Kendrin) (Pericentrin-B)	psother110	1	3336	3336	_	Homo sapiens	Centrosome	29973724	572	601	30	7.2	162.48	[6.3-8.3]; 161.05	4	119.73	[4.0-4.3]; 121.43	_	162.34	5.7	42.75	False	Unfolded	None	5.3	-0.101	7.5	-0.26	-0.25469	0.159	_	-0.258168	-0.177711
O95613	Pericentrin (Kendrin) (Pericentrin-B)	psother110	1	3336	3336	_	Homo sapiens	Centrosome	29973724	723	743	21	6.2	121.8	[5.6-6.8]; 120.82	9	91.11	[8.8-9.0]; 92.61	_	117.41	7.9	30.69	True	U->F	7.35	9	0.083	4	-0.111	-0.0141787	0.194	_	-0.0470444	0.0831119
O95613	Pericentrin (Kendrin) (Pericentrin-B)	psother110	1	3336	3336	_	Homo sapiens	Centrosome	29973724	832	853	22	9	75.42	[7.8-9.0]; 73.9	4	31.73	[4.0-4.4]; 33.8	_	65.87	3.9	43.69	False	Non-confident transition	None	4	0.285	9	-0.012	0.0315961	0.297	_	-0.0120454	0.284748
O95613	Pericentrin (Kendrin) (Pericentrin-B)	psother110	1	3336	3336	_	Homo sapiens	Centrosome	29973724	1057	1082	26	6.5	109.46	[5.9-7.0]; 108.72	9	87.64	[4.0-9.0]; 88.88	_	107.83	5.7	21.82	Possible Multitransition	Variable	[4.349999999999999; 5.949999999999993; 7.749999999999987]	9	0.048	4	-0.028	-0.0187841	0.076	_	-0.0179907	0.0478394
O95613	Pericentrin (Kendrin) (Pericentrin-B)	psother110	1	3336	3336	_	Homo sapiens	Centrosome	29973724	1393	1432	40	7.3	154.38	[6.4-8.4]; 152.91	4	109.33	[4.0-4.4]; 111.37	_	154.06	4.5	45.05	False	Unfolded	None	4.5	-0.021	7.2	-0.228	-0.227303	0.207	_	-0.228198	-0.0632909
O95613	Pericentrin (Kendrin) (Pericentrin-B)	psother110	1	3336	3336	_	Homo sapiens	Centrosome	29973724	1471	1504	34	8	163.48	[6.8-9.0]; 161.97	4	111.95	[4.0-4.4]; 114.04	_	160.64	4.6	51.53	False	Unfolded	None	4.7	-0.029	8.1	-0.302	-0.283871	0.273	_	-0.302037	-0.0914388
O95613	Pericentrin (Kendrin) (Pericentrin-B)	psother110	1	3336	3336	_	Homo sapiens	Centrosome	29973724	1506	1529	24	8.3	68.94	[7.2-9.0]; 68.14	4	43.73	[4.0-4.3]; 44.68	_	65.99	7	25.21	False	Folded	None	4.7	0.226	8.3	0.171	0.181636	0.055	_	0.171468	0.21198
O95613	Pericentrin (Kendrin) (Pericentrin-B)	psother110	1	3336	3336	_	Homo sapiens	Centrosome	29973724	1618	1644	27	8.8	52.74	[7.2-9.0]; 51.32	4	6.75	[4.0-4.4]; 8.91	_	46.91	3.5	45.99	False	Folded	None	4	0.341	8.8	0.08	0.100571	0.261	_	0.0801274	0.34146
O95613	Pericentrin (Kendrin) (Pericentrin-B)	psother110	1	3336	3336	_	Homo sapiens	Centrosome	29973724	1952	1983	32	8	94.56	[7.1-8.6]; 94.14	4	83.14	[4.0-4.2]; 83.57	_	93.37	12	11.42	True	U->F	5.95	9	0.04	4	-0.036	0.0223154	0.076	_	0.0252146	-0.0360638
O95613	Pericentrin (Kendrin) (Pericentrin-B)	psother110	1	3336	3336	_	Homo sapiens	Centrosome	29973724	2109	2131	23	9	120.83	[8.2-9.0]; 115.98	4	10.51	[4.0-4.4]; 15.05	_	85.99	3.1	110.32	True	F->U	5.05	4	0.209	9	-0.363	-0.232344	0.572	_	-0.362842	0.209284
O95613	Pericentrin (Kendrin) (Pericentrin-B)	psother110	1	3336	3336	_	Homo sapiens	Centrosome	29973724	2161	2223	63	8.5	72.61	[7.1-9.0]; 71.69	4	41.55	[4.0-4.4]; 42.85	_	69.13	4.4	31.06	False	Folded	None	4.3	0.231	8.5	0.058	0.07281	0.173	_	0.0577137	0.218648
O95613	Pericentrin (Kendrin) (Pericentrin-B)	psother110	1	3336	3336	_	Homo sapiens	Centrosome	29973724	2247	2280	34	9	49.98	[8.2-9.0]; 48.86	4	20.45	[4.0-4.4]; 21.73	_	39.85	4.2	29.53	False	Folded	None	4	0.324	9	0.156	0.197976	0.168	_	0.155693	0.324093
O95613	Pericentrin (Kendrin) (Pericentrin-B)	psother110	1	3336	3336	_	Homo sapiens	Centrosome	29973724	2288	2396	109	7.4	70.36	[6.4-8.5]; 69.64	4	47.76	[4.0-4.5]; 48.68	_	70.09	4.8	22.6	False	Folded	None	4.9	0.23	7.7	0.126	0.129794	0.104	_	0.126578	0.202248
O95613	Pericentrin (Kendrin) (Pericentrin-B)	psother110	1	3336	3336	_	Homo sapiens	Centrosome	29973724	2405	2446	42	7.6	57.07	[6.5-9.0]; 56.25	4	30.67	[4.0-4.4]; 31.86	_	56.6	4.4	26.4	False	Folded	None	4.5	0.258	7.9	0.079	0.0854275	0.179	_	0.0797175	0.233387
O95613	Pericentrin (Kendrin) (Pericentrin-B)	psother110	1	3336	3336	_	Homo sapiens	Centrosome	29973724	2815	2836	22	6.8	131.55	[6.1-7.5]; 130.95	4	112.86	[4.0-4.3]; 113.7	_	131.36	6.6	18.69	False	Unfolded	None	6	-0.053	4	-0.137	-0.0956933	0.084	_	-0.0918191	-0.13727
O95613	Pericentrin (Kendrin) (Pericentrin-B)	psother110	1	3336	3336	_	Homo sapiens	Centrosome	29973724	2870	2909	40	6.6	129.19	[6.1-7.3]; 128.6	4	111.96	[4.0-9.0]; 112.64	_	128.66	11.4	17.23	False	Unfolded	None	9	-0.095	4	-0.215	-0.166022	0.12	_	-0.171591	-0.215277
O95613	Pericentrin (Kendrin) (Pericentrin-B)	psother110	1	3336	3336	_	Homo sapiens	Centrosome	29973724	2933	2976	44	8.4	143.74	[7.3-9.0]; 142.55	4	103.24	[4.0-4.4]; 104.87	_	138.1	5.7	40.5	False	Unfolded	None	5	-0.019	8.4	-0.144	-0.120797	0.125	_	-0.14373	-0.0595486
O95613	Pericentrin (Kendrin) (Pericentrin-B)	psother110	1	3336	3336	_	Homo sapiens	Centrosome	29973724	3090	3125	36	8	108.94	[6.9-8.9]; 107.86	4	76.52	[4.0-4.4]; 77.9	_	106.61	7	32.42	False	Folded	None	4.9	0.1	8	0.037	0.0459616	0.063	_	0.0371197	0.0682397
O95613	Pericentrin (Kendrin) (Pericentrin-B)	psother110	1	3336	3336	_	Homo sapiens	Centrosome	29973724	3223	3336	114	5.9	93.07	[5.4-6.7]; 92.79	9	84.92	[9.0-9.0]; 84.92	_	92	11.8	8.15	True	U->F	6.65	9	0.031	4	-0.044	0.0052408	0.075	_	-0.0157332	0.0306295
O96028	Histone-lysine N-methyltransferase NSD2 (EC 2.1.1.357) (Multiple myeloma SET domain-containing protein) (MMSET) (Nuclear SET domain-containing protein 2) (Protein trithorax-5) (Wolf-Hirschhorn syndrome candidate 1 protein)	psother538	1	1365	1365	_	Homo sapiens	_	33589584	93	128	36	6	61.62	[5.2-6.7]; 60.63	9	35.57	[8.8-9.0]; 36.86	_	56.97	9.8	26.05	False	Folded	None	9	0.247	4	0.097	0.16313	0.15	_	0.134452	0.246808
O96028	Histone-lysine N-methyltransferase NSD2 (EC 2.1.1.357) (Multiple myeloma SET domain-containing protein) (MMSET) (Nuclear SET domain-containing protein 2) (Protein trithorax-5) (Wolf-Hirschhorn syndrome candidate 1 protein)	psother538	1	1365	1365	_	Homo sapiens	_	33589584	149	172	24	6.5	190.29	[5.9-7.1]; 189.54	9	165.44	[8.9-9.0]; 166.42	_	188.9	11.4	24.85	False	Unfolded	None	9	-0.311	4	-0.414	-0.394918	0.103	_	-0.399286	-0.31119
O96028	Histone-lysine N-methyltransferase NSD2 (EC 2.1.1.357) (Multiple myeloma SET domain-containing protein) (MMSET) (Nuclear SET domain-containing protein 2) (Protein trithorax-5) (Wolf-Hirschhorn syndrome candidate 1 protein)	psother538	1	1365	1365	_	Homo sapiens	_	33589584	370	395	26	7.4	113.2	[6.5-9.0]; 111.26	4	59.38	[4.0-4.3]; 61.5	_	112.38	3.7	53.82	True	F->U	5.05	4	0.192	7.4	-0.156	-0.153369	0.348	_	-0.15618	0.191735
O96028	Histone-lysine N-methyltransferase NSD2 (EC 2.1.1.357) (Multiple myeloma SET domain-containing protein) (MMSET) (Nuclear SET domain-containing protein 2) (Protein trithorax-5) (Wolf-Hirschhorn syndrome candidate 1 protein)	psother538	1	1365	1365	_	Homo sapiens	_	33589584	405	453	49	6.2	104.63	[5.5-6.9]; 104.03	9	86.86	[8.9-9.0]; 87.51	_	102.68	10.5	17.77	False	Non-confident transition	None	9	0.002	4	-0.089	-0.0580775	0.091	_	-0.0699943	0.00235885
O96028	Histone-lysine N-methyltransferase NSD2 (EC 2.1.1.357) (Multiple myeloma SET domain-containing protein) (MMSET) (Nuclear SET domain-containing protein 2) (Protein trithorax-5) (Wolf-Hirschhorn syndrome candidate 1 protein)	psother538	1	1365	1365	_	Homo sapiens	_	33589584	471	491	21	8.8	101.14	[7.2-9.0]; 99.45	4	38.43	[4.0-4.3]; 40.66	_	93.96	3.7	62.71	True	F->U	5.55	4	0.27	8.8	-0.163	-0.132048	0.433	_	-0.162875	0.269626
O96028	Histone-lysine N-methyltransferase NSD2 (EC 2.1.1.357) (Multiple myeloma SET domain-containing protein) (MMSET) (Nuclear SET domain-containing protein 2) (Protein trithorax-5) (Wolf-Hirschhorn syndrome candidate 1 protein)	psother538	1	1365	1365	_	Homo sapiens	_	33589584	504	586	83	6.5	122.57	[5.9-7.2]; 122.06	4	107.17	[4.0-9.0]; 107.78	_	121.9	9.8	15.4	False	Unfolded	None	9	-0.059	4	-0.139	-0.115708	0.08	_	-0.121459	-0.139231
O96028	Histone-lysine N-methyltransferase NSD2 (EC 2.1.1.357) (Multiple myeloma SET domain-containing protein) (MMSET) (Nuclear SET domain-containing protein 2) (Protein trithorax-5) (Wolf-Hirschhorn syndrome candidate 1 protein)	psother538	1	1365	1365	_	Homo sapiens	_	33589584	605	657	53	7.9	95.74	[6.6-9.0]; 94.95	4	58.81	[4.0-4.3]; 60.61	_	94.49	3.7	36.93	True	F->U	5.55	4	0.177	8.6	-0.078	-0.0650759	0.255	_	-0.0756355	0.177351
O96028	Histone-lysine N-methyltransferase NSD2 (EC 2.1.1.357) (Multiple myeloma SET domain-containing protein) (MMSET) (Nuclear SET domain-containing protein 2) (Protein trithorax-5) (Wolf-Hirschhorn syndrome candidate 1 protein)	psother538	1	1365	1365	_	Homo sapiens	_	33589584	1335	1365	31	5.8	171.84	[4.6-6.6]; 169.96	9	120.52	[8.9-9.0]; 122.01	_	162.68	12.7	51.32	False	Unfolded	None	9	-0.326	4	-0.556	-0.485902	0.23	_	-0.523099	-0.325986
O96561	Partner of Numb	psother95	1	228	228	_	Drosophila melanogaster	_	29467404	6	56	51	6.7	56.7	[6.1-7.4]; 56.22	4	42.54	[4.0-4.3]; 43.14	_	56.44	8.8	14.16	False	Folded	None	9	0.219	4	0.166	0.175235	0.053	_	0.173509	0.165509
O96561	Partner of Numb	psother95	1	228	228	_	Drosophila melanogaster	_	29467404	65	151	87	5.7	96.87	[4.5-6.5]; 95.67	9	67.46	[8.8-9.0]; 68.91	_	90.11	10.7	29.41	True	U->F	7.15	9	0.086	4	-0.086	-0.00493827	0.172	_	-0.0508822	0.0856615
O96561	Partner of Numb	psother95	1	228	228	_	Drosophila melanogaster	_	29467404	168	228	61	8.5	47.98	[7.1-9.0]; 47.19	4	19.5	[4.0-4.4]; 20.52	_	44.85	4.3	28.48	False	Folded	None	4.3	0.321	8.5	0.16	0.174862	0.161	_	0.160098	0.311738
P00519	Tyrosine-protein kinase ABL1 (EC 2.7.10.2) (Abelson murine leukemia viral oncogene homolog 1) (Abelson tyrosine-protein kinase 1) (Proto-oncogene c-Abl) (p150)	psother475	782	1019	238	_	Homo sapiens	PML nuclear body	33260713;27374333	782	1020	239	6	67.84	[5.1-6.7]; 67.19	9	49.75	[8.9-9.0]; 50.28	_	64.84	10.2	18.09	False	Folded	None	9	0.205	4	0.116	0.149642	0.089	_	0.135734	0.204628
P02545	Prelamin-A/C [Cleaved into: Lamin-A/C (70 kDa lamin) (Renal carcinoma antigen NY-REN-32)]	psother84	1	664	664	_	Homo sapiens	Nuclear body	28854361	1	33	33	6.9	109.2	[6.3-7.6]; 108.8	4	96.37	[4.0-4.4]; 96.96	_	109.18	12.4	12.83	False	Unfolded	None	9	-0.028	4	-0.078	-0.0638027	0.05	_	-0.0639024	-0.0781646
P02545	Prelamin-A/C [Cleaved into: Lamin-A/C (70 kDa lamin) (Renal carcinoma antigen NY-REN-32)]	psother84	1	664	664	_	Homo sapiens	Nuclear body	28854361	267	288	22	7.2	96.72	[6.3-8.1]; 96.29	4	83.18	[4.0-4.3]; 83.81	_	96.66	10.1	13.54	False	Folded	None	4.8	0.043	7.3	0.019	0.0196465	0.024	_	0.019351	0.0286679
P02545	Prelamin-A/C [Cleaved into: Lamin-A/C (70 kDa lamin) (Renal carcinoma antigen NY-REN-32)]	psother84	1	664	664	_	Homo sapiens	Nuclear body	28854361	330	354	25	7.6	177.42	[6.7-8.6]; 176.1	4	134.77	[4.0-4.4]; 136.69	_	175.93	10.5	42.65	False	Unfolded	None	5	-0.205	7.6	-0.281	-0.276718	0.076	_	-0.28095	-0.259431
P02545	Prelamin-A/C [Cleaved into: Lamin-A/C (70 kDa lamin) (Renal carcinoma antigen NY-REN-32)]	psother84	1	664	664	_	Homo sapiens	Nuclear body	28854361	383	443	61	6.4	141.69	[5.7-7.1]; 141.21	9	126.87	[8.9-9.0]; 127.5	_	140.71	12.2	14.82	False	Unfolded	None	9	-0.133	4	-0.262	-0.194696	0.129	_	-0.207343	-0.133259
P02545	Prelamin-A/C [Cleaved into: Lamin-A/C (70 kDa lamin) (Renal carcinoma antigen NY-REN-32)]	psother84	1	664	664	_	Homo sapiens	Nuclear body	28854361	542	570	29	9	157.14	[8.1-9.0]; 154.51	4	83.75	[4.0-4.4]; 86.74	_	136.9	4.6	73.39	True	F->U	4.85	4.4	0.078	9	-0.395	-0.306434	0.473	_	-0.395155	0.0460657
P02545	Prelamin-A/C [Cleaved into: Lamin-A/C (70 kDa lamin) (Renal carcinoma antigen NY-REN-32)]	psother84	1	664	664	_	Homo sapiens	Nuclear body	28854361	598	620	23	9	43.14	[4.0-4.0]; 43.14	9	43.14	[4.0-4.0]; 43.14	_	43.14	7	0	False	Folded	None	4	0.261	4	0.261	0.260619	0	_	0.260619	0.260619
P02545	Prelamin-A/C [Cleaved into: Lamin-A/C (70 kDa lamin) (Renal carcinoma antigen NY-REN-32)]	psother84	1	664	664	_	Homo sapiens	Nuclear body	28854361	644	664	21	5.6	49.29	[4.0-7.7]; 49.25	9	45.97	[9.0-9.0]; 45.97	_	49.23	10.9	3.32	False	Folded	None	9	0.14	4	0.127	0.126735	0.013	_	0.126516	0.140109
P03069	General control transcription factor GCN4 (Amino acid biosynthesis regulatory protein) (General control protein GCN4)	psother361	1	281	281	pH 7.5	Saccharomyces cerevisiae	Mediator condensate;Transcriptional condensate	32434105;30449618	216	254	39	6.5	115.97	[5.8-7.2]; 115.39	9	98.35	[8.9-9.0]; 99.15	Middle	115.13	12.4	17.62	False	Unfolded	None	9	-0.116	4	-0.193	-0.179972	0.077	Unfolded	-0.182774	-0.11648
P03372	Estrogen receptor (ER) (ER-alpha) (Estradiol receptor) (Nuclear receptor subfamily 3 group A member 1)	psself211	1	595	595	pH 7.5	Homo sapiens	enhancer condensate	32434105;30833784	142	174	33	7.9	121.81	[6.9-8.6]; 121.1	4	99.36	[4.0-4.3]; 100.16	10% maximum solubility	120.26	11.8	22.45	False	Unfolded	None	4.8	-0.079	7.9	-0.127	-0.120303	0.048	Unfolded	-0.126829	-0.0973294
P03372	Estrogen receptor (ER) (ER-alpha) (Estradiol receptor) (Nuclear receptor subfamily 3 group A member 1)	psself211	1	595	595	pH 7.5	Homo sapiens	enhancer condensate	32434105;30833784	257	281	25	7.2	207.13	[6.2-8.1]; 206.28	4	179.81	[4.0-4.2]; 180.76	10% maximum solubility	207.07	11.8	27.32	False	Unfolded	None	9	-0.427	4	-0.515	-0.488368	0.088	Unfolded	-0.486667	-0.514757
P03372	Estrogen receptor (ER) (ER-alpha) (Estradiol receptor) (Nuclear receptor subfamily 3 group A member 1)	psself211	1	595	595	pH 7.5	Homo sapiens	enhancer condensate	32434105;30833784	552	572	21	8.8	98.68	[7.5-9.0]; 97.76	4	67.43	[4.0-4.4]; 68.69	10% maximum solubility	93.47	4.4	31.25	True	F->U	6.85	4.3	0.164	8.8	-0.029	-0.00583736	0.193	Unfolded	-0.0293567	0.149636
P03421	Phosphoprotein (Protein P)	psother408	1	241	241	_	Human respiratory syncytial virus A	Inclusion body	32878896	54	107	54	7	55.33	[6.2-8.0]; 54.64	4	34.45	[4.0-4.3]; 35.25	_	55.33	4.5	20.88	False	Folded	None	4.5	0.249	6.9	0.155	0.15521	0.094	_	0.15521	0.232014
P03421	Phosphoprotein (Protein P)	psother408	1	241	241	_	Human respiratory syncytial virus A	Inclusion body	32878896	111	136	26	9	144.78	[7.7-9.0]; 142.03	4	64.55	[4.0-4.4]; 68.15	_	129.85	3.1	80.23	True	F->U	4.35	4	0.08	9	-0.369	-0.309847	0.449	_	-0.369231	0.0795348
P03421	Phosphoprotein (Protein P)	psother408	1	241	241	_	Human respiratory syncytial virus A	Inclusion body	32878896	191	231	41	7.5	124.78	[6.5-8.8]; 123.4	4	80.9	[4.0-4.3]; 82.24	_	123.89	4.3	43.88	True	F->U	4.85	4.3	0.094	7.5	-0.14	-0.137117	0.234	_	-0.140287	0.0769358
P03421	Phosphoprotein (Protein P)	psother415	160	227	68	_	Human respiratory syncytial virus A	Inclusion body	32963000	189	228	40	7.6	127.63	[6.5-8.8]; 126.23	4	83.6	[4.0-4.3]; 84.97	_	126.63	4.3	44.03	True	F->U	4.75	4.3	0.083	7.6	-0.16	-0.156844	0.243	_	-0.160476	0.065378
P03466	Nucleoprotein (Nucleocapsid protein) (Protein N)	psother400	1	498	498	_	Influenza A virus	_	32835749;30967547	1	25	25	7.7	127.41	[6.6-8.9]; 126.25	4	90.22	[4.0-4.4]; 91.86	_	126.25	4.3	37.19	True	F->U	4.95	4.3	0.084	7.7	-0.116	-0.111847	0.2	_	-0.116394	0.0628112
P03520	Phosphoprotein (P protein) (Protein M1)	psother148	1	265	265	_	Vesicular stomatitis Indiana virus	_	30826453;30181255	31	92	62	8.9	103.38	[7.3-9.0]; 101.29	4	34.43	[4.0-4.3]; 37.33	_	94.68	3.5	68.95	True	F->U	5.25	4	0.222	9	-0.199	-0.156739	0.421	_	-0.198287	0.22177
P03520	Phosphoprotein (P protein) (Protein M1)	psother148	1	265	265	_	Vesicular stomatitis Indiana virus	_	30826453;30181255	106	131	26	7.5	95.01	[6.4-8.8]; 93.82	4	57.65	[4.0-4.3]; 59.06	_	94.46	4.4	37.36	True	F->U	5.95	4.4	0.172	7.7	-0.056	-0.0507054	0.228	_	-0.0554935	0.146789
P04049	RAF proto-oncogene serine/threonine-protein kinase (EC 2.7.11.1) (Proto-oncogene c-RAF) (cRaf) (Raf-1)	psother554	1	648	648	_	Homo sapiens	_	33645620	243	271	29	6.8	77.57	[5.8-7.8]; 77.49	4	74.65	[4.0-9.0]; 74.79	_	77.55	12.5	2.92	False	Folded	None	9	0.099	4	0.047	0.085912	0.052	_	0.084346	0.046875
P04049	RAF proto-oncogene serine/threonine-protein kinase (EC 2.7.11.1) (Proto-oncogene c-RAF) (cRaf) (Raf-1)	psother554	1	648	648	_	Homo sapiens	_	33645620	274	333	60	6.5	85.41	[5.9-7.2]; 85.07	9	74.87	[8.9-9.0]; 75.34	_	84.94	11.8	10.54	False	Folded	None	9	0.106	4	0.036	0.0683836	0.07	_	0.0637904	0.105858
P04050	DNA-directed RNA polymerase II subunit RPB1 (RNA polymerase II subunit 1) (RNA polymerase II subunit B1) (EC 2.7.7.6) (DNA-directed RNA polymerase III largest subunit) (RNA polymerase II subunit B220)	psself222	1593	1970	378	pH 7.4	Saccharomyces cerevisiae	_	32594560;30127355	1593	1733	141	6.9	33.39	[6.3-7.6]; 33.29	4	30.49	[4.0-4.6]; 30.57	10% maximum solubility	33.38	5.2	2.9	False	Folded	None	5.4	0.306	7.1	0.297	0.29656	0.009	Folded	0.296635	0.298138
P04147	Polyadenylate-binding protein; cytoplasmic and nuclear (PABP) (Poly(A)-binding protein) (ARS consensus-binding protein ACBP-67) (Polyadenylate tail-binding protein)	psother158	1	577	577	pH 6.4	Saccharomyces cerevisiae	Stress granule	30963611;26359986	11	31	21	8.8	111.54	[7.2-9.0]; 110.2	4	66.64	[4.0-4.3]; 68.42	Middle	106.09	3.5	44.9	True	F->U	5.05	4	0.117	8.9	-0.121	-0.101077	0.238	Unfolded	-0.121118	0.117061
P04147	Polyadenylate-binding protein; cytoplasmic and nuclear (PABP) (Poly(A)-binding protein) (ARS consensus-binding protein ACBP-67) (Polyadenylate tail-binding protein)	psother158	1	577	577	pH 6.4	Saccharomyces cerevisiae	Stress granule	30963611;26359986	448	506	59	5.7	26.56	[4.5-6.6]; 26.24	9	18.1	[8.9-9.0]; 18.42	10% maximum solubility	25.07	12	8.46	False	Folded	None	9	0.29	4	0.261	0.265932	0.029	Folded	0.261257	0.289636
P04147	Polyadenylate-binding protein; cytoplasmic and nuclear (PABP) (Poly(A)-binding protein) (ARS consensus-binding protein ACBP-67) (Polyadenylate tail-binding protein)	psother158	1	577	577	pH 6.4	Saccharomyces cerevisiae	Stress granule	30963611;26359986	511	534	24	6	77.66	[5.2-6.7]; 76.47	9	42.84	[8.8-9.0]; 44.34	10% maximum solubility	71.47	9.4	34.82	False	Folded	None	9	0.213	4	0.047	0.10409	0.166	Folded	0.0812789	0.212885
P04150	Glucocorticoid receptor (GR) (Nuclear receptor subfamily 3 group C member 1)	psother366	408	777	370	_	Homo sapiens	_	32487073	501	521	21	6.7	68.95	[6.1-7.4]; 68.47	4	55.33	[4.0-4.3]; 55.83	_	68.67	4.1	13.62	False	Folded	None	4.2	0.207	6.8	0.116	0.116433	0.091	_	0.115804	0.198708
P04289	Cytoplasmic envelopment protein 3	psself203	1	96	96	_	Human herpesvirus 1	_	32371601	39	96	58	8.4	91.09	[7.4-9.0]; 90.23	4	64.43	[4.0-4.4]; 65.41	_	86.74	7.9	26.66	False	Folded	None	5.2	0.075	4	0.042	0.0695246	0.033	_	0.0601893	0.0421786
P04591	Gag polyprotein (Pr55Gag) [Cleaved into: Matrix protein p17 (MA); Capsid protein p24 (CA); Spacer peptide 1 (SP1) (p2); Nucleocapsid protein p7 (NC); Spacer peptide 2 (SP2) (p1); p6-gag]	psself197	1	500	500	_	Human immunodeficiency virus type 1	Stress granule	32320662	99	127	29	6.4	136.8	[5.8-7.0]; 135.95	9	114.04	[4.0-9.0]; 115.06	_	134.55	5.7	22.76	False	Unfolded	None	9	-0.051	6.7	-0.122	-0.119358	0.071	_	-0.120448	-0.0505008
P04591	Gag polyprotein (Pr55Gag) [Cleaved into: Matrix protein p17 (MA); Capsid protein p24 (CA); Spacer peptide 1 (SP1) (p2); Nucleocapsid protein p7 (NC); Spacer peptide 2 (SP2) (p1); p6-gag]	psself197	1	500	500	_	Human immunodeficiency virus type 1	Stress granule	32320662	215	241	27	8.4	46.67	[7.7-9.0]; 46.32	4	36.28	[4.0-4.3]; 36.75	_	44.34	10.5	10.39	False	Folded	None	9	0.238	4	0.171	0.237545	0.067	_	0.235198	0.170875
P04591	Gag polyprotein (Pr55Gag) [Cleaved into: Matrix protein p17 (MA); Capsid protein p24 (CA); Spacer peptide 1 (SP1) (p2); Nucleocapsid protein p7 (NC); Spacer peptide 2 (SP2) (p1); p6-gag]	psself197	1	500	500	_	Human immunodeficiency virus type 1	Stress granule	32320662	444	483	40	7.2	70.64	[6.4-8.3]; 69.64	4	41.78	[4.0-4.4]; 42.98	_	70.52	4.5	28.86	False	Folded	None	4.6	0.25	7.3	0.112	0.112811	0.138	_	0.111833	0.217512
P04792	Heat shock protein beta-1 (HspB1) (28 kDa heat shock protein) (Estrogen-regulated 24 kDa protein) (Heat shock 27 kDa protein) (HSP 27) (Stress-responsive protein 27) (SRP27)	psother483	1	205	205	_	Homo sapiens	Stress granule	33303320;32231288	148	180	33	7.8	40.53	[6.6-9.0]; 40.01	4	16.43	[4.0-4.3]; 17.5	_	39.78	3.6	24.1	False	Folded	None	4	0.329	7.5	0.187	0.188444	0.142	_	0.18712	0.328585
P04792	Heat shock protein beta-1 (HspB1) (28 kDa heat shock protein) (Estrogen-regulated 24 kDa protein) (Heat shock 27 kDa protein) (HSP 27) (Stress-responsive protein 27) (SRP27)	psother483	1	205	205	_	Homo sapiens	Stress granule	33303320;32231288	183	205	23	7.1	78.93	[6.3-8.0]; 78.07	4	51.94	[4.0-4.3]; 53.0	_	78.93	4.6	26.99	False	Folded	None	4.6	0.183	6.9	0.067	0.0674353	0.116	_	0.0677267	0.151123
P05205	Heterochromatin protein 1 (HP1) (Non-histone chromosomal protein C1A9 antigen)	psself236	1	206	206	_	Drosophila melanogaster	Heterochromatin	32726576;31866201	1	31	31	7.2	122.86	[6.3-8.5]; 120.69	4	64.01	[4.0-4.2]; 65.92	_	122.68	3.8	58.85	True	F->U	4.65	4	0.153	7.4	-0.261	-0.25812	0.414	_	-0.260196	0.153129
P05205	Heterochromatin protein 1 (HP1) (Non-histone chromosomal protein C1A9 antigen)	psself236	1	206	206	_	Drosophila melanogaster	Heterochromatin	32726576;31866201	48	154	107	7	115.7	[6.3-7.9]; 114.83	4	90.24	[4.0-4.5]; 91.33	_	115.7	4.8	25.46	True	F->U	5.45	4.8	0.048	6.9	-0.043	-0.042749	0.091	_	-0.042749	0.0133947
P05453	Eukaryotic peptide chain release factor GTP-binding subunit (ERF-3) (ERF3) (ERF2) (G1 to S phase transition protein 1) (Omnipotent suppressor protein 2) (PSI no more protein 2) (Polypeptide release factor 3) (Translation release factor 3)	psother14	2	134	133	pH 7.5	Saccharomyces cerevisiae	_	22579281	2	38	37	8.8	94.29	[7.9-9.0]; 94.05	4	85.88	[4.0-4.5]; 86.26	Middle	91.79	7	8.41	False	Folded	None	4.6	0.085	8.6	0.067	0.0733135	0.018	Folded	0.0667394	0.0828455
P05453	Eukaryotic peptide chain release factor GTP-binding subunit (ERF-3) (ERF3) (ERF2) (G1 to S phase transition protein 1) (Omnipotent suppressor protein 2) (PSI no more protein 2) (Polypeptide release factor 3) (Translation release factor 3)	psother14	2	134	133	pH 7.5	Saccharomyces cerevisiae	_	22579281	55	119	65	6.8	34.53	[5.9-7.6]; 34.47	4	32.79	[4.0-4.2]; 32.86	10% maximum solubility	34.51	9	1.74	False	Folded	None	9	0.271	6.3	0.264	0.264469	0.007	Folded	0.264278	0.265339
P05453	Eukaryotic peptide chain release factor GTP-binding subunit (ERF-3) (ERF3) (ERF2) (G1 to S phase transition protein 1) (Omnipotent suppressor protein 2) (PSI no more protein 2) (Polypeptide release factor 3) (Translation release factor 3)	psself73	1	685	685	pH 7.5	Saccharomyces cerevisiae	Stress granule	29301985	1	38	38	8.8	92.26	[8.0-9.0]; 91.99	4	82.23	[4.0-4.5]; 82.68	Middle	89.18	7	10.03	False	Folded	None	4.6	0.097	8.6	0.078	0.0852223	0.019	Folded	0.0785668	0.0948812
P05453	Eukaryotic peptide chain release factor GTP-binding subunit (ERF-3) (ERF3) (ERF2) (G1 to S phase transition protein 1) (Omnipotent suppressor protein 2) (PSI no more protein 2) (Polypeptide release factor 3) (Translation release factor 3)	psself73	1	685	685	pH 7.5	Saccharomyces cerevisiae	Stress granule	29301985	56	150	95	5.4	55.47	[4.0-6.3]; 54.96	9	39.36	[8.8-9.0]; 40.04	Middle	50.89	9.8	16.11	False	Folded	None	9	0.215	4	0.161	0.176041	0.054	Folded	0.161603	0.215049
P05453	Eukaryotic peptide chain release factor GTP-binding subunit (ERF-3) (ERF3) (ERF2) (G1 to S phase transition protein 1) (Omnipotent suppressor protein 2) (PSI no more protein 2) (Polypeptide release factor 3) (Translation release factor 3)	psself73	1	685	685	pH 7.5	Saccharomyces cerevisiae	Stress granule	29301985	155	254	100	6.7	136.92	[6.1-7.5]; 135.51	4	93.78	[4.0-4.4]; 94.97	10% maximum solubility	136.41	4.3	43.14	True	F->U	4.65	4.3	0.052	6.8	-0.184	-0.182184	0.236	Unfolded	-0.183553	0.0199413
P06104	Ubiquitin-conjugating enzyme E2 2 (EC 2.3.2.23) (E2 ubiquitin-conjugating enzyme 2) (Radiation sensitivity protein 6) (Ubiquitin carrier protein UBC2) (Ubiquitin-protein ligase UBC2)	psother322	1	172	172	_	Saccharomyces cerevisiae	_	32214243	148	172	25	9	315.32	[8.3-9.0]; 304.1	4	35.58	[4.0-4.4]; 46.52	_	220.97	1.8	279.74	False	Unfolded	None	4	-0.219	9	-1.498	-1.15127	1.279	_	-1.49768	-0.218851
P06241	Tyrosine-protein kinase Fyn (EC 2.7.10.2) (Proto-oncogene Syn) (Proto-oncogene c-Fyn) (Src-like kinase) (SLK) (p59-Fyn)	psother135	1	537	537	_	Homo sapiens	Stress granule	30397184	14	36	23	8.8	111.8	[7.6-9.0]; 110.25	4	61.93	[4.0-4.4]; 64.16	_	102	3.9	49.87	True	F->U	6.35	4	0.19	8.8	-0.061	-0.0261485	0.251	_	-0.060667	0.189629
P06401	Progesterone receptor (PR) (Nuclear receptor subfamily 3 group C member 3)	psother507	1	933	933	_	Homo sapiens	Nuclear body	33512446;18931262	1	53	53	6.7	14.6	[6.1-7.5]; 14.32	4	5.97	[4.0-4.3]; 6.33	_	14.49	7.9	8.63	False	Folded	None	9	0.387	4	0.345	0.370311	0.042	_	0.368826	0.345334
P06401	Progesterone receptor (PR) (Nuclear receptor subfamily 3 group C member 3)	psother507	1	933	933	_	Homo sapiens	Nuclear body	33512446;18931262	58	136	79	8.8	75.04	[7.5-9.0]; 73.86	4	36.26	[4.0-4.3]; 37.98	_	68.51	3.8	38.78	False	Folded	None	4	0.252	8.8	0.044	0.0706788	0.208	_	0.0442511	0.252108
P06401	Progesterone receptor (PR) (Nuclear receptor subfamily 3 group C member 3)	psother507	1	933	933	_	Homo sapiens	Nuclear body	33512446;18931262	138	245	108	7.1	49.81	[6.4-8.0]; 49.3	4	34.12	[4.0-4.5]; 34.67	_	49.8	5.2	15.69	False	Folded	None	5	0.261	7.3	0.198	0.198581	0.063	_	0.198111	0.234493
P06401	Progesterone receptor (PR) (Nuclear receptor subfamily 3 group C member 3)	psother507	1	933	933	_	Homo sapiens	Nuclear body	33512446;18931262	276	297	22	8.4	35.61	[7.5-9.0]; 34.98	4	13.08	[4.0-4.4]; 13.96	_	31.62	7	22.53	False	Folded	None	4.8	0.329	8.5	0.274	0.28849	0.055	_	0.273887	0.315118
P06401	Progesterone receptor (PR) (Nuclear receptor subfamily 3 group C member 3)	psother507	1	933	933	_	Homo sapiens	Nuclear body	33512446;18931262	415	447	33	8.4	-4.99	[7.5-9.0]; -5.41	4	-19.69	[4.0-4.4]; -19.15	_	-7.63	7	14.7	False	Folded	None	4.8	0.455	8.4	0.422	0.430316	0.033	_	0.422367	0.445527
P06634	ATP-dependent RNA helicase DED1 (EC 3.6.4.13) (DEAD box protein 1)	psother229	1	604	604	_	Saccharomyces cerevisiae	Stress granule	31435012	1	60	60	7.4	77.42	[6.5-8.3]; 77.15	4	68.2	[4.0-4.4]; 68.63	_	77.29	9.6	9.22	False	Folded	None	9	0.114	4	0.074	0.0960992	0.04	_	0.0973931	0.073785
P06634	ATP-dependent RNA helicase DED1 (EC 3.6.4.13) (DEAD box protein 1)	psother229	1	604	604	_	Saccharomyces cerevisiae	Stress granule	31435012	67	96	30	5.6	66.26	[4.9-6.3]; 66.0	9	58.53	[8.9-9.0]; 58.9	_	64.55	12.8	7.73	False	Folded	None	9	0.094	4	0.033	0.0675746	0.061	_	0.0419305	0.0936965
P06634	ATP-dependent RNA helicase DED1 (EC 3.6.4.13) (DEAD box protein 1)	psother229	1	604	604	_	Saccharomyces cerevisiae	Stress granule	31435012	539	596	58	7.6	121.05	[6.6-8.2]; 120.78	4	113.13	[4.0-4.2]; 113.39	_	120.78	12.6	7.92	False	Unfolded	None	9	-0.125	7.6	-0.146	-0.144708	0.021	_	-0.146144	-0.12896
P06748	Nucleophosmin (NPM) (Nucleolar phosphoprotein B23) (Nucleolar protein NO38) (Numatrin)	psother168	1	294	294	pH 7.5	Homo sapiens	Nucleolus	30981631	112	262	151	7.6	141.19	[6.4-9.0]; 139.48	4	85.82	[4.0-4.2]; 86.92	10% maximum solubility	140.3	4.2	55.37	True	F->U	4.55	4.1	0.091	7.5	-0.196	-0.193444	0.287	Unfolded	-0.196431	0.0824137
P06778	DNA repair and recombination protein RAD52	psother513	1	471	471	_	Saccharomyces cerevisiae	DNA damage foci	33543712	167	271	105	8	100.37	[6.7-9.0]; 99.38	4	69.91	[4.0-4.5]; 71.22	_	98.63	4.6	30.46	False	Non-confident transition	None	4.4	0.125	7.8	-0.001	0.003077	0.126	_	-0.00034307	0.107383
P06778	DNA repair and recombination protein RAD52	psother513	1	471	471	_	Saccharomyces cerevisiae	DNA damage foci	33543712	274	320	47	8.4	54.66	[6.9-9.0]; 53.84	4	23.74	[4.0-4.2]; 24.75	_	52.11	3.8	30.92	False	Folded	None	4	0.289	7.7	0.136	0.138138	0.153	_	0.137529	0.288911
P06778	DNA repair and recombination protein RAD52	psother513	1	471	471	_	Saccharomyces cerevisiae	DNA damage foci	33543712	341	369	29	5.5	79.57	[4.7-6.1]; 78.93	9	60.69	[8.8-9.0]; 61.57	_	73.04	10.1	18.88	False	Non-confident transition	None	9	0.126	4	-0.013	0.0728323	0.139	_	0.00494164	0.1261
P06778	DNA repair and recombination protein RAD52	psother513	1	471	471	_	Saccharomyces cerevisiae	DNA damage foci	33543712	371	471	101	5.7	67.34	[4.8-6.5]; 66.58	9	46.11	[8.9-9.0]; 46.7	_	62.75	11.4	21.23	False	Folded	None	9	0.164	4	0.046	0.102053	0.118	_	0.0710699	0.164229
P07237	Protein disulfide-isomerase (PDI) (EC 5.3.4.1) (Cellular thyroid hormone-binding protein) (Prolyl 4-hydroxylase subunit beta) (p55)	psother315	1	508	508	_	Homo sapiens	Stress granule	32087196	475	508	34	9	209.54	[7.9-9.0]; 203.39	4	56.45	[4.0-4.4]; 63.67	_	174.48	3.1	153.09	False	Unfolded	None	4	-0.023	9	-0.831	-0.697732	0.808	_	-0.831084	-0.0227192
P07305	Histone H1.0 (Histone H1') (Histone H1(0)) [Cleaved into: Histone H1.0; N-terminally processed]	psother298	1	194	194	_	Homo sapiens	_	31952807	1	57	57	5.5	109.51	[4.1-6.3]; 108.04	9	72.89	[8.8-9.0]; 74.51	_	99.56	10.5	36.62	True	U->F	8.55	9	0.03	4	-0.147	-0.0697145	0.177	_	-0.1274	0.0295055
P07305	Histone H1.0 (Histone H1') (Histone H1(0)) [Cleaved into: Histone H1.0; N-terminally processed]	psother298	1	194	194	_	Homo sapiens	_	31952807	87	194	108	4.5	151.66	[4.0-6.0]; 149.7	9	46.45	[8.8-9.0]; 50.06	_	115.87	11.4	105.21	False	Unfolded	None	9	-0.058	4	-0.476	-0.328458	0.418	_	-0.470122	-0.0582798
P07621	Plasmid Partition par B protein	psother387	1	343	343	_	Escherichia coli	_	32679076	56	79	24	8.4	105.49	[7.2-9.0]; 104.64	4	77.34	[4.0-4.3]; 78.63	_	102.18	5.2	28.15	False	Non-confident transition	None	4.8	0.078	8.2	-0.014	-0.00358957	0.092	_	-0.0142144	0.0585745
P08621	U1 small nuclear ribonucleoprotein 70 kDa (U1 snRNP 70 kDa) (U1-70K) (snRNP70)	psself323	317	407	91	_	Homo sapiens	Nuclear body	33549703;31723601	317	408	92	8.5	207.79	[7.5-9.0]; 205.97	4	141.58	[4.0-4.5]; 144.02	_	196.08	5.2	66.21	False	Unfolded	None	4.8	-0.184	8.4	-0.409	-0.365935	0.225	_	-0.408974	-0.227181
P08775	DNA-directed RNA polymerase II subunit RPB1 (RNA polymerase II subunit B1) (EC 2.7.7.6) (DNA-directed RNA polymerase II subunit A) (DNA-directed RNA polymerase III largest subunit)	psother359	1	1970	1970	_	Mus musculus	_	32434105;29930094	37	60	24	6.9	61.89	[6.2-7.8]; 61.04	4	37.65	[4.0-4.3]; 38.62	_	61.86	4.6	24.24	False	Folded	None	4.6	0.255	6.9	0.145	0.144951	0.11	_	0.144934	0.225152
P08775	DNA-directed RNA polymerase II subunit RPB1 (RNA polymerase II subunit B1) (EC 2.7.7.6) (DNA-directed RNA polymerase II subunit A) (DNA-directed RNA polymerase III largest subunit)	psother359	1	1970	1970	_	Mus musculus	_	32434105;29930094	323	344	22	4	111.6	[4.0-5.9]; 110.29	9	56.55	[8.8-9.0]; 58.88	_	93.27	13.9	55.05	False	Unfolded	None	9	-0.086	4	-0.301	-0.230219	0.215	_	-0.300974	-0.0858405
P08775	DNA-directed RNA polymerase II subunit RPB1 (RNA polymerase II subunit B1) (EC 2.7.7.6) (DNA-directed RNA polymerase II subunit A) (DNA-directed RNA polymerase III largest subunit)	psother359	1	1970	1970	_	Mus musculus	_	32434105;29930094	1557	1970	414	6.2	19.26	[4.0-6.9]; 19.14	9	16.22	[8.9-9.0]; 16.31	_	18.89	8.8	3.04	False	Folded	None	9	0.354	4	0.338	0.343266	0.016	_	0.341267	0.354233
P09052	ATP-dependent RNA helicase vasa (EC 3.6.4.13) (Antigen Mab46F11)	psother434	1	661	661	_	Drosophila melanogaster	Nuage	33007213;25842866	1	192	192	8.5	146.88	[7.5-9.0]; 145.45	4	98.69	[4.0-4.8]; 99.95	_	137.65	4.8	48.19	Possible Multitransition	Variable	[4.05; 5.149999999999996]	4.8	0.028	8.5	-0.149	-0.116923	0.177	_	-0.149445	-0.00282872
P09651	Heterogeneous nuclear ribonucleoprotein A1 (hnRNP A1) (Helix-destabilizing protein) (Single-strand RNA-binding protein) (hnRNP core protein A1) [Cleaved into: Heterogeneous nuclear ribonucleoprotein A1; N-terminally processed]	psother16	1	372	372	_	Homo sapiens	Stress granule	23455423	76	97	22	7	155.29	[6.1-8.0]; 154.51	4	132.27	[4.0-4.2]; 133.09	_	155.29	11.4	23.02	False	Unfolded	None	9	-0.199	4	-0.282	-0.24538	0.083	_	-0.24538	-0.281624
P09651	Heterogeneous nuclear ribonucleoprotein A1 (hnRNP A1) (Helix-destabilizing protein) (Single-strand RNA-binding protein) (hnRNP core protein A1) [Cleaved into: Heterogeneous nuclear ribonucleoprotein A1; N-terminally processed]	psother16	1	372	372	_	Homo sapiens	Stress granule	23455423	178	211	34	5.8	99.91	[4.3-6.7]; 99.2	9	82.54	[8.9-9.0]; 83.11	_	96.99	12.9	17.37	False	Unfolded	None	9	-0.043	4	-0.112	-0.0938108	0.069	_	-0.10328	-0.042539
P09651	Heterogeneous nuclear ribonucleoprotein A1 (hnRNP A1) (Helix-destabilizing protein) (Single-strand RNA-binding protein) (hnRNP core protein A1) [Cleaved into: Heterogeneous nuclear ribonucleoprotein A1; N-terminally processed]	psother16	1	372	372	_	Homo sapiens	Stress granule	23455423	341	372	32	4.1	76.76	[4.0-6.1]; 76.44	9	63.92	[8.9-9.0]; 64.33	_	73.38	10.7	12.84	False	Folded	None	9	0.079	4	0.031	0.0442232	0.048	_	0.031348	0.0790967
P09651	Heterogeneous nuclear ribonucleoprotein A1 (hnRNP A1) (Helix-destabilizing protein) (Single-strand RNA-binding protein) (hnRNP core protein A1) [Cleaved into: Heterogeneous nuclear ribonucleoprotein A1; N-terminally processed]	psself302	186	320	135	_	Homo sapiens	Stress granule	33311513	186	211	26	5.9	78.09	[4.0-7.7]; 78.04	9	73.59	[9.0-9.0]; 73.59	_	78.02	14.5	4.5	False	Folded	None	9	0.039	4	0.023	0.0232801	0.016	_	0.0230252	0.0394827
P09651	Heterogeneous nuclear ribonucleoprotein A1 (hnRNP A1) (Helix-destabilizing protein) (Single-strand RNA-binding protein) (hnRNP core protein A1) [Cleaved into: Heterogeneous nuclear ribonucleoprotein A1; N-terminally processed]	psself326	185	320	136	_	Homo sapiens	_	33577679	185	236	52	8	77.7	[7.2-8.5]; 77.44	4	69.98	[4.0-4.5]; 70.33	_	76.69	12.8	7.72	False	Folded	None	4.8	0.092	8.1	0.07	0.0746566	0.022	_	0.0696642	0.0859371
P09651	Heterogeneous nuclear ribonucleoprotein A1 (hnRNP A1) (Helix-destabilizing protein) (Single-strand RNA-binding protein) (hnRNP core protein A1) [Cleaved into: Heterogeneous nuclear ribonucleoprotein A1; N-terminally processed]	psself326	185	320	136	_	Homo sapiens	_	33577679	255	276	22	6.1	53.01	[4.0-7.7]; 52.99	9	51.24	[9.0-9.0]; 51.24	_	52.98	9.8	1.77	False	Folded	None	9	0.172	4	0.165	0.165538	0.007	_	0.165443	0.171921
P0A9A6	Cell division protein FtsZ	psother140	1	383	383	pH 7.5	Escherichia coli	_	30523075	336	363	28	6.7	67.85	[5.9-7.9]; 67.48	4	55.98	[4.0-4.2]; 56.48	10% maximum solubility	67.78	8.8	11.87	False	Folded	None	9	0.197	4	0.146	0.176667	0.051	Folded	0.173557	0.145502
P0A9P6	ATP-dependent RNA helicase DeaD (EC 3.6.4.13) (Cold-shock DEAD box protein A) (Translation factor W2)	psother230	1	629	629	_	Escherichia coli	_	31435012	438	488	51	8.5	184.95	[7.6-9.0]; 182.89	4	118.82	[4.0-4.4]; 121.28	_	170.38	11.8	66.13	False	Unfolded	None	4.6	-0.191	8.5	-0.379	-0.322852	0.188	_	-0.379168	-0.214083
P0A9P6	ATP-dependent RNA helicase DeaD (EC 3.6.4.13) (Cold-shock DEAD box protein A) (Translation factor W2)	psother230	1	629	629	_	Escherichia coli	_	31435012	528	629	102	7.8	131.51	[6.9-8.5]; 130.88	4	111.57	[4.0-4.4]; 112.3	_	130.19	12.2	19.94	False	Unfolded	None	9	-0.119	4	-0.153	-0.140001	0.034	_	-0.143031	-0.152754
P0AGE0	Single-stranded DNA-binding protein (SSB) (Helix-destabilizing protein)	psself254	1	178	178	_	Escherichia coli	_	33020264	109	178	70	9	37.03	[8.0-9.0]; 36.19	4	13.36	[4.0-4.4]; 14.49	_	30.41	3.7	23.67	False	Folded	None	4	0.332	9	0.24	0.258328	0.092	_	0.24001	0.332291
P0DMV8	Heat shock 70 kDa protein 1A (Heat shock 70 kDa protein 1) (HSP70-1) (HSP70.1)	psother489	1	641	641	_	Homo sapiens	Anisosome	33335017	617	641	25	7.4	33.86	[6.4-8.9]; 33.13	4	12.64	[4.0-4.3]; 13.63	_	33.6	3.7	21.22	False	Folded	None	4	0.352	7.7	0.213	0.214895	0.139	_	0.213112	0.352274
P0DTC9	Nucleoprotein (N) (Nucleocapsid protein) (NC) (Protein N)	psother377	1	419	419	_	Severe acute respiratory syndrome coronavirus 2	SARS-CoV-2 N condensate	32637943	1	100	100	7.8	92.01	[6.7-8.4]; 91.64	4	81.24	[4.0-4.3]; 81.63	_	91.46	11.8	10.77	False	Folded	None	9	0.035	7.7	0.018	0.0192933	0.017	_	0.0180956	0.0242991
P0DTC9	Nucleoprotein (N) (Nucleocapsid protein) (NC) (Protein N)	psother377	1	419	419	_	Severe acute respiratory syndrome coronavirus 2	SARS-CoV-2 N condensate	32637943	141	161	21	5.6	37.96	[5.0-6.2]; 37.66	9	29.18	[8.9-9.0]; 29.48	_	35.34	11.4	8.78	False	Folded	None	9	0.265	4	0.191	0.241332	0.074	_	0.204696	0.264591
P0DTC9	Nucleoprotein (N) (Nucleocapsid protein) (NC) (Protein N)	psother377	1	419	419	_	Severe acute respiratory syndrome coronavirus 2	SARS-CoV-2 N condensate	32637943	168	213	46	6.3	119.32	[5.1-7.2]; 118.96	9	109.31	[9.0-9.0]; 109.31	_	118.74	12.9	10.01	False	Unfolded	None	9	-0.174	4	-0.215	-0.20783	0.041	_	-0.209394	-0.174226
P0DTC9	Nucleoprotein (N) (Nucleocapsid protein) (NC) (Protein N)	psother377	1	419	419	_	Severe acute respiratory syndrome coronavirus 2	SARS-CoV-2 N condensate	32637943	231	294	64	5.9	110.85	[4.8-6.6]; 109.81	9	82.27	[8.9-9.0]; 83.04	_	105.66	10.9	28.58	False	Non-confident transition	None	9	0.005	4	-0.135	-0.0887463	0.14	_	-0.111758	0.00514667
P0DTC9	Nucleoprotein (N) (Nucleocapsid protein) (NC) (Protein N)	psother377	1	419	419	_	Severe acute respiratory syndrome coronavirus 2	SARS-CoV-2 N condensate	32637943	361	394	34	5.7	115.26	[4.6-6.5]; 113.3	9	63.85	[8.8-9.0]; 66.14	_	103.39	10.3	51.41	False	Unfolded	None	9	-0.012	4	-0.237	-0.171166	0.225	_	-0.219221	-0.0117346
P0DTC9	Nucleoprotein (N) (Nucleocapsid protein) (NC) (Protein N)	psself289	45	364	320	_	Severe acute respiratory syndrome coronavirus 2	SARS-CoV-2 N condensate	33248025	63	93	31	8.1	83.31	[7.3-8.7]; 82.71	4	64.77	[4.0-4.3]; 65.52	_	80.73	11.4	18.54	False	Folded	None	4.5	0.066	8.2	0.008	0.021929	0.058	_	0.0082456	0.0593143
P0DTC9	Nucleoprotein (N) (Nucleocapsid protein) (NC) (Protein N)	psself289	45	364	320	_	Severe acute respiratory syndrome coronavirus 2	SARS-CoV-2 N condensate	33248025	141	161	21	5.6	37.96	[5.0-6.2]; 37.66	9	29.18	[8.9-9.0]; 29.48	_	35.34	11.4	8.78	False	Folded	None	9	0.265	4	0.191	0.241332	0.074	_	0.204696	0.264591
P0DTC9	Nucleoprotein (N) (Nucleocapsid protein) (NC) (Protein N)	psself289	45	364	320	_	Severe acute respiratory syndrome coronavirus 2	SARS-CoV-2 N condensate	33248025	168	213	46	6.3	119.32	[5.1-7.2]; 118.96	9	109.31	[9.0-9.0]; 109.31	_	118.74	12.9	10.01	False	Unfolded	None	9	-0.174	4	-0.215	-0.20783	0.041	_	-0.209394	-0.174226
P0DTC9	Nucleoprotein (N) (Nucleocapsid protein) (NC) (Protein N)	psself317	49	419	371	_	Severe acute respiratory syndrome coronavirus 2	SARS-CoV-2 N condensate	33479198	63	83	21	8.6	65.7	[7.7-9.0]; 64.84	4	32.13	[4.0-4.3]; 33.58	_	58.9	4.2	33.57	False	Folded	None	4	0.293	8.8	0.116	0.147638	0.177	_	0.116631	0.292882
P0DTC9	Nucleoprotein (N) (Nucleocapsid protein) (NC) (Protein N)	psself317	175	419	245	_	Severe acute respiratory syndrome coronavirus 2	SARS-CoV-2 N condensate	33479198	175	217	43	7.9	136.24	[7.2-8.3]; 136.03	4	130.4	[4.0-4.4]; 130.66	_	135.38	13.3	5.84	False	Unfolded	None	9	-0.204	7.7	-0.221	-0.219349	0.017	_	-0.221004	-0.21243
P10591	Heat shock protein SSA1 (Heat shock protein YG100)	psother29	1	642	642	_	Saccharomyces cerevisiae	Stress granule	26238190	515	536	22	6.8	144.05	[6.1-7.5]; 142.46	4	98.85	[4.0-4.3]; 100.66	_	143.59	4.5	45.2	False	Non-confident transition	None	4.6	0.003	6.7	-0.209	-0.207386	0.212	_	-0.209415	-0.056335
P10591	Heat shock protein SSA1 (Heat shock protein YG100)	psother29	1	642	642	_	Saccharomyces cerevisiae	Stress granule	26238190	553	595	43	7.1	116.5	[6.2-8.4]; 114.88	4	71.02	[4.0-4.2]; 72.33	_	116.44	4.2	45.48	True	F->U	5.15	4.1	0.16	7.1	-0.098	-0.0978868	0.258	_	-0.0981096	0.150621
P10591	Heat shock protein SSA1 (Heat shock protein YG100)	psother29	1	642	642	_	Saccharomyces cerevisiae	Stress granule	26238190	602	642	41	7.5	20.63	[6.5-9.0]; 19.96	4	-2.44	[4.0-4.3]; -1.39	_	20.24	3.5	23.07	False	Folded	None	4	0.421	7.9	0.28	0.283036	0.141	_	0.280624	0.421011
P10592	Heat shock protein SSA2	psother192	1	639	639	_	Saccharomyces cerevisiae	Hyperosmotic shock foci	31285266	515	536	22	6.8	144.05	[6.1-7.5]; 142.46	4	98.85	[4.0-4.3]; 100.66	_	143.59	4.5	45.2	False	Non-confident transition	None	4.6	0.003	6.7	-0.209	-0.207386	0.212	_	-0.209415	-0.056335
P10592	Heat shock protein SSA2	psother192	1	639	639	_	Saccharomyces cerevisiae	Hyperosmotic shock foci	31285266	567	595	29	7.2	97.18	[6.3-8.5]; 95.55	4	50.52	[4.0-4.2]; 52.02	_	97.03	4	46.66	True	F->U	5.45	4	0.22	7.2	-0.072	-0.0712657	0.292	_	-0.0718218	0.219793
P10592	Heat shock protein SSA2	psother192	1	639	639	_	Saccharomyces cerevisiae	Hyperosmotic shock foci	31285266	602	639	38	7.6	28.18	[6.5-9.0]; 27.39	4	-2.21	[4.0-4.3]; -0.88	_	27.52	3.3	30.39	False	Folded	None	4	0.408	8	0.215	0.219573	0.193	_	0.215586	0.408486
P10636	Microtubule-associated protein tau (Neurofibrillary tangle protein) (Paired helical filament-tau) (PHF-tau)	psother169	255	368	114	_	Homo sapiens	Tau condensate	30986567;30950394	270	369	100	7.3	71.55	[6.4-8.6]; 70.57	4	42.71	[4.0-4.5]; 43.62	_	71.31	4.5	28.84	False	Folded	None	4.5	0.246	7.6	0.081	0.0839092	0.165	_	0.0812627	0.217668
P10636	Microtubule-associated protein tau (Neurofibrillary tangle protein) (Paired helical filament-tau) (PHF-tau)	psother316	244	372	129	_	Homo sapiens	Tau condensate	32087196	244	373	130	7.4	57.86	[6.5-8.6]; 57.07	4	33.62	[4.0-4.7]; 34.48	_	57.54	4.6	24.24	False	Folded	None	4.7	0.286	7.6	0.162	0.165224	0.124	_	0.162494	0.255718
P10636	Microtubule-associated protein tau (Neurofibrillary tangle protein) (Paired helical filament-tau) (PHF-tau)	psother398	1	758	758	_	Homo sapiens	Tau condensate	32824618;31456657	1	603	603	7.1	78.84	[6.6-7.9]; 78.38	5.1	66.14	[4.7-5.5]; 66.41	_	78.78	6.1	12.7	False	Folded	None	5	0.171	7.1	0.126	0.126052	0.045	_	0.125888	0.170836
P10636	Microtubule-associated protein tau (Neurofibrillary tangle protein) (Paired helical filament-tau) (PHF-tau)	psother398	1	758	758	_	Homo sapiens	Tau condensate	32824618;31456657	638	660	23	5.4	101.24	[4.0-6.2]; 99.56	9	59.9	[8.8-9.0]; 61.33	_	88.38	9.6	41.34	True	U->F	7.15	9	0.114	4	-0.179	-0.0129466	0.293	_	-0.129532	0.114296
P10636	Microtubule-associated protein tau (Neurofibrillary tangle protein) (Paired helical filament-tau) (PHF-tau)	psother398	1	758	758	_	Homo sapiens	Tau condensate	32824618;31456657	674	700	27	5.7	87.5	[4.9-6.4]; 86.45	9	58.13	[8.8-9.0]; 59.47	_	80.18	10.1	29.37	True	U->F	6.25	9	0.139	4	-0.078	0.0433141	0.217	_	-0.0287336	0.138634
P10636	Microtubule-associated protein tau (Neurofibrillary tangle protein) (Paired helical filament-tau) (PHF-tau)	psself147	245	374	130	_	Homo sapiens	Tau condensate	31266957	245	375	131	7.3	56.42	[6.4-8.4]; 55.65	4	32.95	[4.0-4.7]; 33.8	_	56.24	4.6	23.47	False	Folded	None	4.7	0.289	7.5	0.17	0.171685	0.119	_	0.16986	0.259314
P10636	Microtubule-associated protein tau (Neurofibrillary tangle protein) (Paired helical filament-tau) (PHF-tau)	psself252	151	254	104	_	Homo sapiens	Tau condensate	32997736	151	255	105	8.1	101.64	[6.8-9.0]; 100.6	4	65.95	[4.0-4.5]; 67.07	_	99.25	4.5	35.69	True	F->U	6.25	4.5	0.148	8.2	-0.038	-0.0258647	0.186	_	-0.0382679	0.121563
P10637	Microtubule-associated protein tau (Neurofibrillary tangle protein) (Paired helical filament-tau) (PHF-tau)	psother603	1	733	733	_	Mus musculus	Tau condensate	33848474	1	578	578	7.2	76.54	[6.6-8.0]; 76.11	5	63.76	[4.6-5.4]; 64.09	_	76.43	5.2	12.78	False	Folded	None	4.9	0.18	7.2	0.133	0.133847	0.047	_	0.133452	0.179495
P10637	Microtubule-associated protein tau (Neurofibrillary tangle protein) (Paired helical filament-tau) (PHF-tau)	psother603	1	733	733	_	Mus musculus	Tau condensate	33848474	613	635	23	5.4	101.24	[4.0-6.2]; 99.56	9	59.9	[8.8-9.0]; 61.33	_	88.38	9.6	41.34	True	U->F	7.15	9	0.114	4	-0.179	-0.0129466	0.293	_	-0.129532	0.114296
P10637	Microtubule-associated protein tau (Neurofibrillary tangle protein) (Paired helical filament-tau) (PHF-tau)	psother603	1	733	733	_	Mus musculus	Tau condensate	33848474	649	675	27	5.7	87.5	[4.9-6.4]; 86.45	9	58.13	[8.8-9.0]; 59.47	_	80.18	10.1	29.37	True	U->F	6.25	9	0.139	4	-0.078	0.0433141	0.217	_	-0.0287336	0.138634
P10644	cAMP-dependent protein kinase type I-alpha regulatory subunit (Tissue-specific extinguisher 1) (TSE1)	psself246	12	113	102	_	Homo sapiens	_	32846158	64	97	34	7.2	115.71	[6.4-8.1]; 115.17	4	98.22	[4.0-4.3]; 98.98	_	115.62	12.2	17.49	False	Unfolded	None	4.8	-0.069	7.4	-0.105	-0.103676	0.036	_	-0.104391	-0.0849045
P10961	Heat shock transcription factor (HSTF) (Heat shock factor protein) (HSF)	psother142	1	833	833	_	Saccharomyces cerevisiae	Nuclear stress body	30605674	1	96	96	8.8	73	[7.7-9.0]; 71.71	4	33.33	[4.0-4.3]; 34.62	_	64.59	4.2	39.67	False	Folded	None	4.1	0.302	8.9	0.09	0.126039	0.212	_	0.0902429	0.299269
P10961	Heat shock transcription factor (HSTF) (Heat shock factor protein) (HSF)	psother142	1	833	833	_	Saccharomyces cerevisiae	Nuclear stress body	30605674	100	129	30	5.3	59.6	[4.0-6.0]; 59.09	9	47.35	[8.8-9.0]; 47.83	_	55.04	9.8	12.25	False	Folded	None	9	0.191	4	0.066	0.155466	0.125	_	0.0888649	0.190901
P10961	Heat shock transcription factor (HSTF) (Heat shock factor protein) (HSF)	psother142	1	833	833	_	Saccharomyces cerevisiae	Nuclear stress body	30605674	138	169	32	8.1	88.11	[7.7-8.4]; 88.01	9	85.57	[4.0-9.0]; 85.69	_	87.14	12	2.54	False	Non-confident transition	None	9	0.009	4	-0.065	-0.00459035	0.074	_	-0.0020494	0.00856746
P10961	Heat shock transcription factor (HSTF) (Heat shock factor protein) (HSF)	psother142	1	833	833	_	Saccharomyces cerevisiae	Nuclear stress body	30605674	273	308	36	5.6	79.31	[5.0-6.2]; 79.14	9	74.69	[8.9-9.0]; 74.85	_	77.8	11.4	4.62	False	Folded	None	9	0.129	4	0.091	0.119146	0.038	_	0.0989768	0.129126
P10961	Heat shock transcription factor (HSTF) (Heat shock factor protein) (HSF)	psother142	1	833	833	_	Saccharomyces cerevisiae	Nuclear stress body	30605674	412	441	30	8.3	78.12	[7.0-9.0]; 77.33	4	51.79	[4.0-4.3]; 52.84	_	75.69	4.4	26.33	False	Folded	None	4.3	0.214	8.2	0.102	0.109053	0.112	_	0.102574	0.204555
P10961	Heat shock transcription factor (HSTF) (Heat shock factor protein) (HSF)	psother142	1	833	833	_	Saccharomyces cerevisiae	Nuclear stress body	30605674	453	498	46	8.5	116.94	[7.4-9.0]; 115.91	4	83.06	[4.0-4.4]; 84.63	_	111.46	4.8	33.88	True	F->U	6.85	4.5	0.101	8.6	-0.026	-0.00265381	0.127	_	-0.0257471	0.0880175
P10961	Heat shock transcription factor (HSTF) (Heat shock factor protein) (HSF)	psother142	1	833	833	_	Saccharomyces cerevisiae	Nuclear stress body	30605674	514	833	320	8.4	94.1	[7.0-9.0]; 93.07	4.3	55.36	[4.0-4.5]; 56.49	_	90.54	4.4	38.74	False	Folded	None	4.3	0.21	8.5	0.036	0.0509916	0.174	_	0.0361769	0.210465
P11021	Endoplasmic reticulum chaperone BiP (EC 3.6.4.10) (78 kDa glucose-regulated protein) (GRP-78) (Binding-immunoglobulin protein) (BiP) (Heat shock protein 70 family protein 5) (HSP70 family protein 5) (Heat shock protein family A member 5) (Immunoglobulin heavy chain-binding protein)	psother490	1	654	654	_	Homo sapiens	Anisosome	33335017	519	557	39	6.7	119.83	[6.1-7.5]; 118.69	4	86.19	[4.0-4.3]; 87.55	_	119.43	4.6	33.64	True	F->U	5.45	4.7	0.085	7	-0.069	-0.0686812	0.154	_	-0.066759	0.0383526
P11021	Endoplasmic reticulum chaperone BiP (EC 3.6.4.10) (78 kDa glucose-regulated protein) (GRP-78) (Binding-immunoglobulin protein) (BiP) (Heat shock protein 70 family protein 5) (HSP70 family protein 5) (Heat shock protein family A member 5) (Immunoglobulin heavy chain-binding protein)	psother490	1	654	654	_	Homo sapiens	Anisosome	33335017	580	605	26	6.6	119.37	[6.0-7.3]; 117.87	4	77.72	[4.0-4.3]; 79.36	_	118.2	4.3	41.65	True	F->U	4.95	4.4	0.106	6.7	-0.136	-0.131966	0.242	_	-0.13549	0.0601889
P11021	Endoplasmic reticulum chaperone BiP (EC 3.6.4.10) (78 kDa glucose-regulated protein) (GRP-78) (Binding-immunoglobulin protein) (BiP) (Heat shock protein 70 family protein 5) (HSP70 family protein 5) (Heat shock protein family A member 5) (Immunoglobulin heavy chain-binding protein)	psother490	1	654	654	_	Homo sapiens	Anisosome	33335017	631	654	24	7.6	85.09	[6.5-9.0]; 83.79	4	39.61	[4.0-4.3]; 41.77	_	84.18	3.7	45.48	True	F->U	6.15	4	0.258	7.7	-0.033	-0.0285636	0.291	_	-0.0328253	0.257643
P11088	Filaggrin (Fragment)	psother319	1	336	336	_	Mus musculus	_	32165560	1	324	324	5.6	145.96	[5.3-5.9]; 145.82	9	142.28	[9.0-9.0]; 142.28	_	143.59	11.8	3.68	False	Unfolded	None	9	-0.124	4	-0.197	-0.13133	0.073	_	-0.164872	-0.123818
P11142	Heat shock cognate 71 kDa protein (EC 3.6.4.10) (Heat shock 70 kDa protein 8) (Lipopolysaccharide-associated protein 1) (LAP-1) (LPS-associated protein 1)	psother491	1	646	646	_	Homo sapiens	Anisosome	33335017	518	540	23	6.5	167.72	[5.9-7.1]; 166.61	4	136.9	[4.0-9.0]; 138.15	_	165.8	7	30.82	False	Unfolded	None	9	-0.092	4	-0.213	-0.185791	0.121	_	-0.193844	-0.213455
P11142	Heat shock cognate 71 kDa protein (EC 3.6.4.10) (Heat shock 70 kDa protein 8) (Lipopolysaccharide-associated protein 1) (LAP-1) (LPS-associated protein 1)	psother491	1	646	646	_	Homo sapiens	Anisosome	33335017	612	646	35	9	18.61	[7.6-9.0]; 17.71	4	-3.42	[4.0-4.4]; -2.39	_	14.83	1.8	22.03	False	Folded	None	4	0.392	9	0.28	0.293594	0.112	_	0.280334	0.392234
P11275	Calcium/calmodulin-dependent protein kinase type II subunit alpha (CaM kinase II subunit alpha) (CaMK-II subunit alpha) (EC 2.7.11.17)	psother468	1	478	478	_	Rattus norvegicus	Postsynaptic density	33235361	314	346	33	6.7	143.74	[6.0-7.4]; 142.79	4	116.75	[4.0-4.3]; 118.05	_	143.16	4.8	26.99	False	Unfolded	None	4.8	-0.047	6.8	-0.145	-0.143868	0.098	_	-0.144748	-0.0822668
P11940	Polyadenylate-binding protein 1 (PABP-1) (Poly(A)-binding protein 1)	psother6	1	636	636	_	Homo sapiens	Stress granule	19048988;11121440	431	502	72	4	37.4	[4.0-5.8]; 37.21	9	30.74	[9.0-9.0]; 30.74	_	35.74	14.5	6.66	False	Folded	None	9	0.19	4	0.154	0.170362	0.036	_	0.153565	0.189849
P11940	Polyadenylate-binding protein 1 (PABP-1) (Poly(A)-binding protein 1)	psother6	1	636	636	_	Homo sapiens	Stress granule	19048988;11121440	515	559	45	6	42.97	[5.4-6.6]; 42.78	9	37.92	[8.9-9.0]; 38.06	_	41.93	8.8	5.05	False	Folded	None	9	0.286	4	0.21	0.269485	0.076	_	0.247296	0.285892
P11994	50 kDa spicule matrix protein	psself133	18	445	428	_	Strongylocentrotus purpuratus	_	30826453;28478667	117	185	69	6.7	22.18	[5.9-7.4]; 21.99	9	16.44	[9.0-9.0]; 16.44	_	22.05	12.8	5.74	False	Folded	None	9	0.279	4	0.244	0.254741	0.035	_	0.253809	0.278543
P11994	50 kDa spicule matrix protein	psself133	18	445	428	_	Strongylocentrotus purpuratus	_	30826453;28478667	195	445	251	7.9	42.07	[7.2-8.3]; 41.99	4.2	39.32	[4.0-4.9]; 39.4	_	41.72	13	2.75	False	Folded	None	9	0.237	7.8	0.23	0.23098	0.007	_	0.230082	0.234428
P12978	Epstein-Barr nuclear antigen 2 (EBNA-2) (EBV nuclear antigen 2)	psself182	145	441	297	_	Epstein-Barr virus	_	31941785	145	442	298	5.5	34.39	[5.0-6.0]; 34.21	9	29.85	[9.0-9.0]; 29.85	_	32.58	11.8	4.54	False	Folded	None	9	0.285	4	0.238	0.273207	0.047	_	0.252506	0.285455
P14904	Vacuolar aminopeptidase 1 (EC 3.4.11.22) (Aminopeptidase yscI) (Leucine aminopeptidase IV) (LAPIV) (Lysosomal aminopeptidase III) (Polypeptidase) (Vacuolar aminopeptidase I)	psother193	1	514	514	_	Saccharomyces cerevisiae	Hyperosmotic shock foci	31285266	226	248	23	8.6	69.34	[7.0-9.0]; 67.54	4	3.97	[4.0-4.3]; 6.67	_	63.01	3.6	65.37	True	F->U	6.45	4	0.327	8.5	-0.04	-0.0218377	0.367	_	-0.0395765	0.326657
P14907	Nucleoporin NSP1 (Nuclear pore protein NSP1) (Nucleoskeletal-like protein) (p110)	psself57	1	601	601	_	Saccharomyces cerevisiae	Nuclear pore complex	28343140;17082456	1	602	602	4	66.3	[4.0-6.7]; 65.46	9	48.53	[8.9-9.0]; 49.08	_	63.62	9.2	17.77	False	Folded	None	9	0.235	4	0.166	0.18106	0.069	_	0.165619	0.235011
P15056	Serine/threonine-protein kinase B-raf (EC 2.7.11.1) (Proto-oncogene B-Raf) (p94) (v-Raf murine sarcoma viral oncogene homolog B1)	psother555	1	766	766	_	Homo sapiens	_	33645620	10	39	30	9	42.53	[7.6-9.0]; 41.18	4	8.45	[4.0-4.4]; 10.01	_	36.8	1.8	34.08	False	Folded	None	4	0.33	9	0.135	0.156611	0.195	_	0.135162	0.330088
P15056	Serine/threonine-protein kinase B-raf (EC 2.7.11.1) (Proto-oncogene B-Raf) (p94) (v-Raf murine sarcoma viral oncogene homolog B1)	psother555	1	766	766	_	Homo sapiens	_	33645620	305	377	73	8.5	51.29	[7.5-9.0]; 50.72	4	31.28	[4.0-4.5]; 32.18	_	47.76	5.2	20.01	False	Folded	None	4.9	0.268	8.6	0.193	0.209707	0.075	_	0.193494	0.254382
P15056	Serine/threonine-protein kinase B-raf (EC 2.7.11.1) (Proto-oncogene B-Raf) (p94) (v-Raf murine sarcoma viral oncogene homolog B1)	psother555	1	766	766	_	Homo sapiens	_	33645620	380	457	78	8.3	102.99	[7.3-9.0]; 102.03	4	73.41	[4.0-4.4]; 74.61	_	98.84	7	29.58	False	Folded	None	4.7	0.095	8.2	0.038	0.0475879	0.057	_	0.0385254	0.0766032
P15502	Elastin (Tropoelastin)	psother52	1	786	786	_	Homo sapiens	_	27272259;29424691	617	646	30	8.1	101.91	[7.2-8.8]; 101.3	4	83.5	[4.0-4.4]; 84.32	_	99.74	12	18.41	False	Folded	None	5.1	0.04	4	0.019	0.0358677	0.021	_	0.0299262	0.0190654
P16401	Histone H1.5 (Histone H1a) (Histone H1b) (Histone H1s-3)	psother585	115	225	111	_	Homo sapiens	_	33771451;30301810	115	226	112	4	149.38	[4.0-5.9]; 146.75	9	35.18	[8.7-9.0]; 40.71	_	108.19	12.2	114.2	False	Unfolded	None	9	-0.031	4	-0.463	-0.306617	0.432	_	-0.46296	-0.0306011
P16521	Elongation factor 3A (EF-3) (EF-3A) (EC 3.6.4.-) (Eukaryotic elongation factor 3) (eEF3) (Translation elongation factor 3A) (Yeast elongation factor 3)	psother159	1	1044	1044	_	Saccharomyces cerevisiae	Stress granule	30963611;26359986	974	1003	30	7.4	106.31	[6.4-8.7]; 105.22	4	70.48	[4.0-4.3]; 71.94	_	105.95	4.4	35.83	True	F->U	5.55	4.4	0.135	7.6	-0.076	-0.0722998	0.211	_	-0.0757154	0.107518
P16862	ATP-dependent 6-phosphofructokinase subunit beta (EC 2.7.1.11) (ATP-dependent 6-phosphofructokinase) (ATP-PFK) (Phosphofructokinase 2) (Phosphohexokinase)	psother334	1	959	959	_	Saccharomyces cerevisiae	Glycolytic body	32298230	141	165	25	6.2	47.49	[5.6-6.9]; 46.94	9	31.85	[8.8-9.0]; 32.57	_	45.53	7	15.64	False	Folded	None	9	0.302	4	0.229	0.255447	0.073	_	0.247726	0.302124
P17066	Heat shock 70 kDa protein 6 (Heat shock 70 kDa protein B')	psother492	1	643	643	_	Homo sapiens	Anisosome	33335017	498	540	43	6.9	135.37	[6.2-7.8]; 134.32	4	104.88	[4.0-4.3]; 106.12	_	135.35	6.1	30.49	False	Unfolded	None	4.9	-0.048	7.1	-0.121	-0.120676	0.073	_	-0.120071	-0.0935441
P17066	Heat shock 70 kDa protein 6 (Heat shock 70 kDa protein B')	psother492	1	643	643	_	Homo sapiens	Anisosome	33335017	619	643	25	9	71.52	[7.7-9.0]; 69.95	4	28.04	[4.0-4.4]; 29.97	_	62.55	3.5	43.48	False	Folded	None	4	0.275	9	0.04	0.076275	0.235	_	0.039713	0.274886
P17600	Synapsin-1 (Brain protein 4.1) (Synapsin I)	psother594	1	705	705	pH 7.4	Homo sapiens	Synapsin condensate	33774037	14	79	66	8.5	9.72	[7.6-9.0]; 9.55	4	4.52	[4.0-4.4]; 4.73	Middle	8.61	8.8	5.2	False	Folded	None	6.8	0.363	4	0.353	0.362668	0.01	Folded	0.36051	0.353338
P17600	Synapsin-1 (Brain protein 4.1) (Synapsin I)	psother594	1	705	705	pH 7.4	Homo sapiens	Synapsin condensate	33774037	405	705	301	5.7	50.3	[4.0-6.5]; 49.95	9	42.83	[8.9-9.0]; 43.14	Middle	48.97	12.7	7.47	False	Folded	None	9	0.216	4	0.179	0.193453	0.037	Folded	0.185271	0.216249
P17844	Probable ATP-dependent RNA helicase DDX5 (EC 3.6.4.13) (DEAD box protein 5) (RNA helicase p68)	psother508	2	167	166	_	Homo sapiens	_	33522570	2	23	22	8.5	129.17	[7.8-9.0]; 128.04	4	87.57	[4.0-4.4]; 89.2	_	118.2	11.8	41.6	False	Unfolded	None	4.5	-0.043	8.5	-0.163	-0.122981	0.12	_	-0.163085	-0.0512822
P17931	Galectin-3 (Gal-3) (35 kDa lectin) (Carbohydrate-binding protein 35) (CBP 35) (Galactose-specific lectin 3) (Galactoside-binding protein) (GALBP) (IgE-binding protein) (L-31) (Laminin-binding protein) (Lectin L-29) (Mac-2 antigen)	psself65	20	100	81	_	Homo sapiens	_	28893908	45	101	57	9	-24.96	[4.0-4.0]; -24.96	9	-24.96	[4.0-4.0]; -24.96	_	-24.96	7	0	False	Folded	None	4	0.517	4	0.517	0.517286	0	_	0.517286	0.517286
P18615	Negative elongation factor E (NELF-E) (RNA-binding protein RD)	psother514	1	380	380	_	Homo sapiens	Nuclear stress body	33548202	30	75	46	5.9	80.08	[5.0-6.6]; 79.35	9	58.62	[8.8-9.0]; 59.65	_	75.97	10.2	21.46	False	Folded	None	9	0.122	4	0.05	0.0649362	0.072	_	0.0551926	0.121567
P18615	Negative elongation factor E (NELF-E) (RNA-binding protein RD)	psother514	1	380	380	_	Homo sapiens	Nuclear stress body	33548202	79	269	191	8.4	181.14	[7.5-9.0]; 179.63	4	134.45	[4.0-4.6]; 136.11	_	172.39	9.6	46.69	False	Unfolded	None	4.7	-0.14	8.4	-0.267	-0.233954	0.127	_	-0.267175	-0.171831
P19097	Fatty acid synthase subunit alpha (EC 2.3.1.86) [Includes: Acyl carrier; 3-oxoacyl-[acyl-carrier-protein] reductase (EC 1.1.1.100) (Beta-ketoacyl reductase); 3-oxoacyl-[acyl-carrier-protein] synthase (EC 2.3.1.41) (Beta-ketoacyl synthase)]	psother195	1	1887	1887	_	Saccharomyces cerevisiae	Hyperosmotic shock foci	31285266	96	126	31	6.8	30.38	[6.2-7.6]; 29.6	4	5.99	[4.0-4.3]; 7.01	_	30.27	3.9	24.39	False	Folded	None	4.1	0.379	6.9	0.199	0.199579	0.18	_	0.199426	0.376971
P19097	Fatty acid synthase subunit alpha (EC 2.3.1.86) [Includes: Acyl carrier; 3-oxoacyl-[acyl-carrier-protein] reductase (EC 1.1.1.100) (Beta-ketoacyl reductase); 3-oxoacyl-[acyl-carrier-protein] synthase (EC 2.3.1.41) (Beta-ketoacyl synthase)]	psother195	1	1887	1887	_	Saccharomyces cerevisiae	Hyperosmotic shock foci	31285266	187	211	25	7.4	80.96	[6.5-9.0]; 79.02	4	22.84	[4.0-4.3]; 25.36	_	80.18	3.6	58.12	True	F->U	5.45	4	0.279	7.4	-0.113	-0.11017	0.392	_	-0.112678	0.27922
P19097	Fatty acid synthase subunit alpha (EC 2.3.1.86) [Includes: Acyl carrier; 3-oxoacyl-[acyl-carrier-protein] reductase (EC 1.1.1.100) (Beta-ketoacyl reductase); 3-oxoacyl-[acyl-carrier-protein] synthase (EC 2.3.1.41) (Beta-ketoacyl synthase)]	psother195	1	1887	1887	_	Saccharomyces cerevisiae	Hyperosmotic shock foci	31285266	1352	1376	25	7.7	89.92	[6.7-8.8]; 89.02	4	60.58	[4.0-4.4]; 61.78	_	88.76	5.7	29.34	False	Folded	None	5.2	0.161	7.8	0.072	0.079036	0.089	_	0.0722133	0.112868
P19097	Fatty acid synthase subunit alpha (EC 2.3.1.86) [Includes: Acyl carrier; 3-oxoacyl-[acyl-carrier-protein] reductase (EC 1.1.1.100) (Beta-ketoacyl reductase); 3-oxoacyl-[acyl-carrier-protein] synthase (EC 2.3.1.41) (Beta-ketoacyl synthase)]	psother195	1	1887	1887	_	Saccharomyces cerevisiae	Hyperosmotic shock foci	31285266	1543	1563	21	6.1	107.94	[5.5-6.8]; 107.13	9	85.82	[8.8-9.0]; 86.91	_	104.48	7.9	22.12	True	U->F	6.55	9	0.085	4	-0.066	0.0150716	0.151	_	-0.0163914	0.084578
P19338	Nucleolin (Protein C23)	psother509	661	698	38	_	Homo sapiens	_	33522570	661	699	39	7.7	87.1	[7.0-8.2]; 86.88	9	81.28	[9.0-9.0]; 81.28	_	86.54	13.3	5.82	False	Unfolded	None	9	-0.062	7.7	-0.085	-0.0831674	0.023	_	-0.0849565	-0.0623125
P19659	Mediator of RNA polymerase II transcription subunit 15 (Autonomous replication regulatory protein 3) (Basal expression activator protein 1) (Defective silencing suppressor protein 4) (Mediator complex subunit 15) (Transcription regulatory protein GAL11) (Ty insertion suppressor protein 13)	psother362	6	651	646	pH 7.5	Saccharomyces cerevisiae	Mediator condensate	32434105;30449618	67	133	67	5.6	63.31	[4.6-6.3]; 62.79	9	49.44	[8.8-9.0]; 50.09	Middle	59.59	10.2	13.87	False	Folded	None	9	0.193	4	0.092	0.147986	0.101	Folded	0.113135	0.193109
P19659	Mediator of RNA polymerase II transcription subunit 15 (Autonomous replication regulatory protein 3) (Basal expression activator protein 1) (Defective silencing suppressor protein 4) (Mediator complex subunit 15) (Transcription regulatory protein GAL11) (Ty insertion suppressor protein 13)	psother362	6	651	646	pH 7.5	Saccharomyces cerevisiae	Mediator condensate	32434105;30449618	135	175	41	4.2	108.83	[4.0-6.2]; 108.55	9	97.95	[8.9-9.0]; 98.34	Middle	106.22	14.5	10.88	False	Unfolded	None	9	-0.076	4	-0.111	-0.103156	0.035	Unfolded	-0.110523	-0.0759641
P19659	Mediator of RNA polymerase II transcription subunit 15 (Autonomous replication regulatory protein 3) (Basal expression activator protein 1) (Defective silencing suppressor protein 4) (Mediator complex subunit 15) (Transcription regulatory protein GAL11) (Ty insertion suppressor protein 13)	psother362	6	651	646	pH 7.5	Saccharomyces cerevisiae	Mediator condensate	32434105;30449618	236	289	54	9	48.35	[4.0-4.0]; 48.35	9	48.35	[4.0-4.0]; 48.35	Middle	48.35	7	0	False	Folded	None	4	0.252	4	0.252	0.251808	0	Folded	0.251808	0.251808
P19659	Mediator of RNA polymerase II transcription subunit 15 (Autonomous replication regulatory protein 3) (Basal expression activator protein 1) (Defective silencing suppressor protein 4) (Mediator complex subunit 15) (Transcription regulatory protein GAL11) (Ty insertion suppressor protein 13)	psother362	6	651	646	pH 7.5	Saccharomyces cerevisiae	Mediator condensate	32434105;30449618	348	508	161	5.1	59.87	[4.0-5.7]; 59.71	9	55.08	[8.8-9.0]; 55.26	Middle	57.4	10.5	4.79	False	Folded	None	9	0.198	4	0.165	0.187925	0.033	Folded	0.167897	0.197785
P19659	Mediator of RNA polymerase II transcription subunit 15 (Autonomous replication regulatory protein 3) (Basal expression activator protein 1) (Defective silencing suppressor protein 4) (Mediator complex subunit 15) (Transcription regulatory protein GAL11) (Ty insertion suppressor protein 13)	psother362	6	651	646	pH 7.5	Saccharomyces cerevisiae	Mediator condensate	32434105;30449618	632	652	21	9	55.58	[4.0-4.0]; 55.58	9	55.58	[4.0-4.0]; 55.58	Middle	55.58	7	0	False	Folded	None	4	0.213	4	0.213	0.21262	0	Folded	0.21262	0.21262
P20226	TATA-box-binding protein (TATA sequence-binding protein) (TATA-binding factor) (TATA-box factor) (Transcription initiation factor TFIID TBP subunit)	psself205	1	339	339	_	Homo sapiens	Transcriptional condensate	32386547	1	161	161	8.7	32.66	[7.1-9.0]; 32.48	4.1	26.19	[4.0-4.3]; 26.37	_	31.98	4	6.47	False	Folded	None	4.1	0.322	8.6	0.288	0.290837	0.034	_	0.288278	0.322418
P20263	POU domain; class 5; transcription factor 1 (NF-A3) (Octamer-binding protein 3) (Oct-3) (Octamer-binding protein 4) (Oct-4) (Octamer-binding transcription factor 3) (OTF-3)	psother220	1	352	352	_	Mus musculus	_	31398323	6	53	48	9	6.51	[8.0-9.0]; 5.29	4	-27.08	[4.0-4.4]; -25.55	_	-1.94	3.4	33.59	False	Folded	None	4	0.476	9	0.318	0.347007	0.158	_	0.317943	0.475563
P20263	POU domain; class 5; transcription factor 1 (NF-A3) (Octamer-binding protein 3) (Oct-3) (Octamer-binding protein 4) (Oct-4) (Octamer-binding transcription factor 3) (OTF-3)	psother220	1	352	352	_	Mus musculus	_	31398323	88	135	48	7.3	99.38	[6.4-8.6]; 98.08	4	62.14	[4.0-4.3]; 63.46	_	99.11	4	37.24	True	F->U	5.75	4.1	0.18	7.4	-0.046	-0.0444685	0.226	_	-0.0462034	0.17238
P20781	Glycine receptor subunit beta (Glycine receptor 58 kDa subunit)	psother452	349	474	126	_	Rattus norvegicus	Postsynaptic density	33139925	360	395	36	5.9	89.25	[5.2-6.6]; 88.38	9	62.42	[8.8-9.0]; 63.72	_	84.3	9.8	26.83	True	U->F	5.05	9	0.131	4	-0.029	0.0415366	0.16	_	0.00774347	0.131304
P20781	Glycine receptor subunit beta (Glycine receptor 58 kDa subunit)	psother452	349	474	126	_	Rattus norvegicus	Postsynaptic density	33139925	446	468	23	4	47.3	[4.0-5.9]; 45.65	9	-15.14	[8.7-9.0]; -12.18	_	24.25	12.2	62.44	False	Folded	None	9	0.252	4	0.018	0.102432	0.234	_	0.0182252	0.252164
P20930	Filaggrin	psother320	1	4061	4061	_	Homo sapiens	_	32165560	89	3975	3887	6.9	171.01	[6.0-9.0]; 158.41	4	-1071.21	[4.0-4.1]; -1020.09	_	170.5	8.8	1242.22	False	Unfolded	None	9	-0.143	4	-0.248	-0.151352	0.105	_	-0.152704	-0.248353
P21507	ATP-dependent RNA helicase SrmB (EC 3.6.4.13)	psother231	1	444	444	_	Escherichia coli	_	31435012	376	444	69	5.7	165.21	[4.6-6.5]; 163.19	9	108.9	[8.8-9.0]; 111.67	_	153.24	10.9	56.31	False	Unfolded	None	9	-0.188	4	-0.482	-0.374335	0.294	_	-0.438389	-0.188348
P22087	rRNA 2'-O-methyltransferase fibrillarin (EC 2.1.1.-) (34 kDa nucleolar scleroderma antigen) (Histone-glutamine methyltransferase) (U6 snRNA 2'-O-methyltransferase fibrillarin)	psother224	1	321	321	_	Homo sapiens	Nucleolus	31399547	1	91	91	5.4	102.18	[4.0-6.4]; 101.75	9	88.47	[8.9-9.0]; 89.06	_	99.47	13.3	13.71	False	Unfolded	None	9	-0.071	4	-0.143	-0.11118	0.072	_	-0.134171	-0.0706991
P22087	rRNA 2'-O-methyltransferase fibrillarin (EC 2.1.1.-) (34 kDa nucleolar scleroderma antigen) (Histone-glutamine methyltransferase) (U6 snRNA 2'-O-methyltransferase fibrillarin)	psself321	2	77	76	_	Homo sapiens	Nucleolus	33522570	2	78	77	5.4	105.83	[4.0-6.6]; 105.49	9	94.56	[9.0-9.0]; 94.56	_	104.29	13.6	11.27	False	Unfolded	None	9	-0.109	4	-0.16	-0.1442	0.051	_	-0.157078	-0.108968
P22363	Phosphoprotein (Protein P) (Protein M1)	psother80	1	297	297	_	Rabies virus	Negri body	28680096	38	61	24	9	123.82	[7.7-9.0]; 121.28	4	46.33	[4.0-4.3]; 49.3	_	109	4	77.49	True	F->U	5.05	4	0.223	9	-0.285	-0.225246	0.508	_	-0.284745	0.222851
P22363	Phosphoprotein (Protein P) (Protein M1)	psother80	1	297	297	_	Rabies virus	Negri body	28680096	133	177	45	6.5	112.04	[5.8-7.1]; 111.44	9	94.69	[8.9-9.0]; 95.35	_	110.99	11.4	17.35	False	Unfolded	None	9	-0.028	4	-0.109	-0.0952625	0.081	_	-0.100095	-0.0279168
P22626	Heterogeneous nuclear ribonucleoproteins A2/B1 (hnRNP A2/B1)	psself217	1	353	353	pH 7.5	Homo sapiens	_	32577653	181	236	56	7.9	86.54	[6.9-8.7]; 85.99	4	69.6	[4.0-4.4]; 70.28	10% maximum solubility	85.32	10.9	16.94	False	Folded	None	4.9	0.107	8	0.072	0.0774294	0.035	Folded	0.0720856	0.0909377
P22626	Heterogeneous nuclear ribonucleoproteins A2/B1 (hnRNP A2/B1)	psself217	1	353	353	pH 7.5	Homo sapiens	_	32577653	238	276	39	8.5	23.83	[7.7-9.0]; 23.58	4	16.13	[4.0-4.5]; 16.5	Middle	21.81	9.4	7.7	False	Folded	None	4.6	0.311	8.4	0.293	0.298639	0.018	Folded	0.292749	0.308996
P22626	Heterogeneous nuclear ribonucleoproteins A2/B1 (hnRNP A2/B1)	psself217	1	353	353	pH 7.5	Homo sapiens	_	32577653	300	321	22	7.6	30.69	[6.2-8.7]; 30.46	4	23.26	[4.0-4.2]; 23.57	10% maximum solubility	30.61	7	7.43	False	Folded	None	4.5	0.331	6.6	0.321	0.321331	0.01	Folded	0.322413	0.327805
P22626	Heterogeneous nuclear ribonucleoproteins A2/B1 (hnRNP A2/B1)	psself4	181	341	161	pH 7.5	Homo sapiens	_	22579281	181	236	56	7.9	86.54	[6.9-8.7]; 85.99	4	69.6	[4.0-4.4]; 70.28	10% maximum solubility	85.32	10.9	16.94	False	Folded	None	4.9	0.107	8	0.072	0.0774294	0.035	Folded	0.0720856	0.0909377
P22626	Heterogeneous nuclear ribonucleoproteins A2/B1 (hnRNP A2/B1)	psself4	181	341	161	pH 7.5	Homo sapiens	_	22579281	238	276	39	8.5	23.83	[7.7-9.0]; 23.58	4	16.13	[4.0-4.5]; 16.5	Middle	21.81	9.4	7.7	False	Folded	None	4.6	0.311	8.4	0.293	0.298639	0.018	Folded	0.292749	0.308996
P22626	Heterogeneous nuclear ribonucleoproteins A2/B1 (hnRNP A2/B1)	psself4	181	341	161	pH 7.5	Homo sapiens	_	22579281	300	321	22	7.6	30.69	[6.2-8.7]; 30.46	4	23.26	[4.0-4.2]; 23.57	10% maximum solubility	30.61	7	7.43	False	Folded	None	4.5	0.331	6.6	0.321	0.321331	0.01	Folded	0.322413	0.327805
P23201	Protein SPA2	psself172	1151	1466	316	_	Saccharomyces cerevisiae	Polarisome	31699995	1156	1312	157	8.1	135.37	[6.6-9.0]; 134.03	4	81.38	[4.0-4.4]; 82.74	_	132.92	4.3	53.99	True	F->U	4.85	4.2	0.097	8.1	-0.212	-0.199381	0.309	_	-0.211927	0.0787752
P23246	Splicing factor; proline- and glutamine-rich (100 kDa DNA-pairing protein) (hPOMp100) (DNA-binding p52/p100 complex; 100 kDa subunit) (Polypyrimidine tract-binding protein-associated-splicing factor) (PSF) (PTB-associated-splicing factor)	psother104	1	707	707	_	Homo sapiens	Paraspeckle	29932899	1	289	289	4.8	45.07	[4.0-5.7]; 44.84	9	31.17	[8.8-9.0]; 31.7	_	37.99	12.2	13.9	False	Folded	None	9	0.275	4	0.19	0.247587	0.085	_	0.196867	0.274859
P23246	Splicing factor; proline- and glutamine-rich (100 kDa DNA-pairing protein) (hPOMp100) (DNA-binding p52/p100 complex; 100 kDa subunit) (Polypyrimidine tract-binding protein-associated-splicing factor) (PSF) (PTB-associated-splicing factor)	psother104	1	707	707	_	Homo sapiens	Paraspeckle	29932899	456	483	28	6.5	89.96	[6.0-7.2]; 89.33	4	70.91	[4.0-4.2]; 71.5	_	89.06	8.8	19.05	False	Folded	None	9	0.128	4	0.01	0.067986	0.118	_	0.0590488	0.00966098
P23246	Splicing factor; proline- and glutamine-rich (100 kDa DNA-pairing protein) (hPOMp100) (DNA-binding p52/p100 complex; 100 kDa subunit) (Polypyrimidine tract-binding protein-associated-splicing factor) (PSF) (PTB-associated-splicing factor)	psother104	1	707	707	_	Homo sapiens	Paraspeckle	29932899	499	707	209	7.4	119.12	[6.7-8.3]; 118.44	4.2	98.54	[4.0-4.8]; 99.01	_	118.65	7	20.58	Possible Multitransition	Variable	[4.1499999999999995; 6.249999999999992]	5	0.032	7.5	-0.023	-0.0202609	0.055	_	-0.0232546	0.00311604
P23771	Trans-acting T-cell-specific transcription factor GATA-3 (GATA-binding factor 3)	psself212	2	250	249	_	Homo sapiens	enhancer condensate	32434105;30833784	2	39	38	9	75.03	[8.5-9.0]; 74.48	4	60.16	[4.0-4.3]; 60.86	_	66.72	6.6	14.87	False	Folded	None	6.1	0.162	4	0.04	0.106671	0.122	_	0.0662577	0.0403194
P23771	Trans-acting T-cell-specific transcription factor GATA-3 (GATA-binding factor 3)	psself212	2	250	249	_	Homo sapiens	enhancer condensate	32434105;30833784	61	86	26	4	56.56	[4.0-5.3]; 56.17	9	44.17	[8.8-9.0]; 44.74	_	49.3	10.5	12.39	False	Folded	None	9	0.128	4	0.01	0.101706	0.118	_	0.00956021	0.128198
P23771	Trans-acting T-cell-specific transcription factor GATA-3 (GATA-binding factor 3)	psself212	2	250	249	_	Homo sapiens	enhancer condensate	32434105;30833784	144	190	47	7	35.6	[6.1-8.1]; 35.23	4	24.32	[4.0-4.2]; 24.74	_	35.6	6.6	11.28	False	Folded	None	6	0.279	7.9	0.251	0.255045	0.028	_	0.255045	0.259032
P23771	Trans-acting T-cell-specific transcription factor GATA-3 (GATA-binding factor 3)	psself212	2	250	249	_	Homo sapiens	enhancer condensate	32434105;30833784	194	223	30	5.1	71.53	[4.0-5.8]; 71.09	9	55.85	[8.7-9.0]; 56.56	_	63.96	10.1	15.68	False	Folded	None	9	0.174	4	0.006	0.135916	0.168	_	0.0288042	0.173675
P23772	Trans-acting T-cell-specific transcription factor GATA-3 (GATA-binding factor 3)	psself267	1	443	443	_	Mus musculus	Transcriptional condensate	33159853	10	38	29	5.1	66.23	[4.5-5.5]; 65.87	7.3	56.31	[6.7-8.0]; 56.65	_	56.45	6.9	9.92	False	Non-confident transition	None	6.4	0.202	4	-0.011	0.165099	0.213	_	0.030665	0.15581
P23772	Trans-acting T-cell-specific transcription factor GATA-3 (GATA-binding factor 3)	psself267	1	443	443	_	Mus musculus	Transcriptional condensate	33159853	61	85	25	4	71.84	[4.0-5.3]; 71.44	9	58.99	[8.8-9.0]; 59.58	_	64.32	10.5	12.85	True	U->F	6.15	9	0.062	4	-0.062	0.0341361	0.124	_	-0.061696	0.0616876
P23772	Trans-acting T-cell-specific transcription factor GATA-3 (GATA-binding factor 3)	psself267	1	443	443	_	Mus musculus	Transcriptional condensate	33159853	143	188	46	7	48.04	[6.1-8.1]; 47.66	4	36.48	[4.0-4.2]; 36.91	_	48.04	6.6	11.56	False	Folded	None	6	0.248	7.9	0.219	0.22363	0.029	_	0.22363	0.22753
P23772	Trans-acting T-cell-specific transcription factor GATA-3 (GATA-binding factor 3)	psself267	1	443	443	_	Mus musculus	Transcriptional condensate	33159853	193	221	29	5.1	73.64	[4.0-5.8]; 73.18	9	57.48	[8.7-9.0]; 58.21	_	65.85	10.1	16.16	False	Non-confident transition	None	9	0.167	4	-0.007	0.127324	0.174	_	0.0168891	0.166852
P23772	Trans-acting T-cell-specific transcription factor GATA-3 (GATA-binding factor 3)	psself267	1	443	443	_	Mus musculus	Transcriptional condensate	33159853	355	380	26	5.1	180.58	[4.0-6.1]; 178.91	9	97.89	[8.8-9.0]; 101.07	_	154.64	10.9	82.69	False	Unfolded	None	9	-0.243	4	-0.593	-0.450784	0.35	_	-0.57209	-0.243006
P23772	Trans-acting T-cell-specific transcription factor GATA-3 (GATA-binding factor 3)	psself267	1	443	443	_	Mus musculus	Transcriptional condensate	33159853	407	443	37	4	17.53	[4.0-5.1]; 17.02	9	2.23	[7.2-9.0]; 2.55	_	4.11	10.5	15.3	False	Folded	None	9	0.397	4	0.217	0.379115	0.18	_	0.216838	0.397322
P24783	ATP-dependent RNA helicase DBP2 (EC 3.6.4.13) (DEAD box protein 2) (p68-like protein)	psother232	1	546	546	_	Saccharomyces cerevisiae	Nucleolus	31435012	1	66	66	8	109.07	[6.9-8.7]; 108.35	4	88.07	[4.0-4.4]; 89.04	_	107.36	9.8	21	False	Non-confident transition	None	4.8	0.002	8	-0.04	-0.0341579	0.042	_	-0.0402806	-0.0148239
P24783	ATP-dependent RNA helicase DBP2 (EC 3.6.4.13) (DEAD box protein 2) (p68-like protein)	psother232	1	546	546	_	Saccharomyces cerevisiae	Nucleolus	31435012	501	546	46	7.7	124.03	[6.7-8.2]; 123.77	9	117.75	[9.0-9.0]; 117.75	_	123.65	12.4	6.28	False	Unfolded	None	9	-0.19	4	-0.226	-0.212936	0.036	_	-0.213058	-0.190018
P24784	ATP-dependent RNA helicase DBP1 (EC 3.6.4.13) (DEAD box protein 1) (Helicase CA1)	psother233	1	617	617	_	Saccharomyces cerevisiae	_	31435012	1	62	62	6.2	92.87	[5.6-6.9]; 92.39	9	77.19	[8.9-9.0]; 77.8	_	91.3	10.7	15.68	True	U->F	7.65	9	0.049	4	-0.049	-0.0138301	0.098	_	-0.0275315	0.0486838
P24784	ATP-dependent RNA helicase DBP1 (EC 3.6.4.13) (DEAD box protein 1) (Helicase CA1)	psother233	1	617	617	_	Saccharomyces cerevisiae	_	31435012	67	108	42	5.2	73.8	[4.0-6.2]; 73.28	9	51.49	[8.8-9.0]; 52.53	_	67.23	11.4	22.31	True	U->F	6.35	9	0.078	4	-0.035	0.0177661	0.113	_	-0.0232534	0.0779331
P24784	ATP-dependent RNA helicase DBP1 (EC 3.6.4.13) (DEAD box protein 1) (Helicase CA1)	psother233	1	617	617	_	Saccharomyces cerevisiae	_	31435012	540	608	69	7.4	105.79	[6.3-8.1]; 105.54	4	98.48	[4.0-4.2]; 98.72	_	105.67	12.5	7.31	False	Unfolded	None	9	-0.048	4	-0.081	-0.0705801	0.033	_	-0.0701289	-0.0813762
P24928	DNA-directed RNA polymerase II subunit RPB1 (RNA polymerase II subunit B1) (EC 2.7.7.6) (DNA-directed RNA polymerase II subunit A) (DNA-directed RNA polymerase III largest subunit) (RNA-directed RNA polymerase II subunit RPB1) (EC 2.7.7.48)	psother101	1	1970	1970	pH 7.4	Homo sapiens	Transcriptional condensate	29849146	37	60	24	6.9	61.89	[6.2-7.8]; 61.04	4	37.65	[4.0-4.3]; 38.62	10% maximum solubility	61.86	4.6	24.24	False	Folded	None	4.6	0.255	6.9	0.145	0.144951	0.11	Folded	0.144934	0.225152
P24928	DNA-directed RNA polymerase II subunit RPB1 (RNA polymerase II subunit B1) (EC 2.7.7.6) (DNA-directed RNA polymerase II subunit A) (DNA-directed RNA polymerase III largest subunit) (RNA-directed RNA polymerase II subunit RPB1) (EC 2.7.7.48)	psother101	1	1970	1970	pH 7.4	Homo sapiens	Transcriptional condensate	29849146	323	344	22	4	111.6	[4.0-5.9]; 110.29	9	56.55	[8.8-9.0]; 58.88	Middle	93.27	13.9	55.05	False	Unfolded	None	9	-0.086	4	-0.301	-0.230219	0.215	Unfolded	-0.300974	-0.0858405
P24928	DNA-directed RNA polymerase II subunit RPB1 (RNA polymerase II subunit B1) (EC 2.7.7.6) (DNA-directed RNA polymerase II subunit A) (DNA-directed RNA polymerase III largest subunit) (RNA-directed RNA polymerase II subunit RPB1) (EC 2.7.7.48)	psother101	1	1970	1970	pH 7.4	Homo sapiens	Transcriptional condensate	29849146	1557	1970	414	6.2	19.26	[4.0-6.9]; 19.14	9	16.22	[8.9-9.0]; 16.31	Middle	18.89	8.8	3.04	False	Folded	None	9	0.354	4	0.338	0.343266	0.016	Folded	0.341267	0.354233
P24928	DNA-directed RNA polymerase II subunit RPB1 (RNA polymerase II subunit B1) (EC 2.7.7.6) (DNA-directed RNA polymerase II subunit A) (DNA-directed RNA polymerase III largest subunit) (RNA-directed RNA polymerase II subunit RPB1) (EC 2.7.7.48)	psother17	1	20	20	pH 7.4	Homo sapiens	_	24267890;29424691	1	21	21	5.6	57.23	[4.9-6.3]; 56.84	9	46.11	[8.9-9.0]; 46.54	Middle	54.36	11.4	11.12	False	Folded	None	9	0.16	4	0.08	0.129882	0.08	Folded	0.093136	0.159828
P24928	DNA-directed RNA polymerase II subunit RPB1 (RNA polymerase II subunit B1) (EC 2.7.7.6) (DNA-directed RNA polymerase II subunit A) (DNA-directed RNA polymerase III largest subunit) (RNA-directed RNA polymerase II subunit RPB1) (EC 2.7.7.48)	psother17	27	52	26	pH 7.4	Homo sapiens	_	24267890;29424691	27	53	27	6.8	101.78	[6.2-7.6]; 100.92	4	75.47	[4.0-4.3]; 76.59	10% maximum solubility	101.66	7	26.31	False	Folded	None	9	0.103	4	0.035	0.0484386	0.068	Folded	0.0469818	0.034667
P24928	DNA-directed RNA polymerase II subunit RPB1 (RNA polymerase II subunit B1) (EC 2.7.7.6) (DNA-directed RNA polymerase II subunit A) (DNA-directed RNA polymerase III largest subunit) (RNA-directed RNA polymerase II subunit RPB1) (EC 2.7.7.48)	psself223	1542	1733	192	pH 7.4	Homo sapiens	_	32594560;30127355	1557	1734	178	7.9	10.12	[6.9-8.5]; 10.1	4.6	9.35	[4.0-4.9]; 9.36	10% maximum solubility	10.08	7	0.77	False	Folded	None	5	0.375	7.7	0.373	0.37344	0.002	Folded	0.373293	0.375027
P25054	Adenomatous polyposis coli protein (Protein APC) (Deleted in polyposis 2.5)	psself256	1351	2070	720	_	Homo sapiens	_	33060621	1351	1385	35	6.1	44.42	[5.4-6.7]; 43.85	9	26.85	[8.8-9.0]; 27.61	_	41.46	7.9	17.57	False	Folded	None	9	0.296	4	0.171	0.237725	0.125	_	0.213416	0.296228
P25054	Adenomatous polyposis coli protein (Protein APC) (Deleted in polyposis 2.5)	psself256	1351	2070	720	_	Homo sapiens	_	33060621	1396	1480	85	6.4	62.54	[5.8-7.1]; 62.11	9	50.43	[8.9-9.0]; 50.87	_	61.65	10.1	12.11	False	Folded	None	9	0.189	4	0.133	0.144218	0.056	_	0.140405	0.188662
P25054	Adenomatous polyposis coli protein (Protein APC) (Deleted in polyposis 2.5)	psself256	1351	2070	720	_	Homo sapiens	_	33060621	1483	1507	25	9	53.08	[8.2-9.0]; 50.84	4	3.53	[4.0-4.4]; 5.65	_	37.18	3.5	49.55	False	Folded	None	4	0.347	9	0.071	0.131712	0.276	_	0.070762	0.346943
P25054	Adenomatous polyposis coli protein (Protein APC) (Deleted in polyposis 2.5)	psself256	1351	1552	202	_	Homo sapiens	_	33060621	1511	1553	43	7.7	119.7	[6.6-9.0]; 118.28	4	60.63	[4.0-4.3]; 63.35	_	118.09	3.7	59.07	True	F->U	4.75	4	0.163	7.9	-0.208	-0.199606	0.371	_	-0.207945	0.162745
P25054	Adenomatous polyposis coli protein (Protein APC) (Deleted in polyposis 2.5)	psself256	1351	2070	720	_	Homo sapiens	_	33060621	1513	1569	57	8.4	136.11	[6.9-9.0]; 134.45	4	63.81	[4.0-4.3]; 67.23	_	130.71	3.6	72.3	True	F->U	4.35	4	0.083	8.2	-0.332	-0.317785	0.415	_	-0.331829	0.0833853
P25054	Adenomatous polyposis coli protein (Protein APC) (Deleted in polyposis 2.5)	psself256	1351	2070	720	_	Homo sapiens	_	33060621	1585	1646	62	5.4	68.89	[4.0-6.3]; 67.82	9	39.12	[8.8-9.0]; 40.52	_	60.83	10.6	29.77	False	Folded	None	9	0.158	4	0.02	0.0756173	0.138	_	0.0328949	0.158213
P25054	Adenomatous polyposis coli protein (Protein APC) (Deleted in polyposis 2.5)	psself256	1553	2070	518	_	Homo sapiens	_	33060621	1585	1621	37	4	80.34	[4.0-5.9]; 78.91	9	23.98	[8.8-9.0]; 25.98	_	60.29	12.7	56.36	True	U->F	7.45	9	0.109	4	-0.098	-0.0259999	0.207	_	-0.0978217	0.109194
P25054	Adenomatous polyposis coli protein (Protein APC) (Deleted in polyposis 2.5)	psself256	1351	2070	720	_	Homo sapiens	_	33060621	1654	1845	192	6.5	94.53	[5.9-7.1]; 94.1	9	81.01	[8.9-9.0]; 81.57	_	93.73	9.2	13.52	False	Folded	None	9	0.102	4	0.029	0.0494545	0.073	_	0.0440774	0.102426
P25054	Adenomatous polyposis coli protein (Protein APC) (Deleted in polyposis 2.5)	psself256	1351	2070	720	_	Homo sapiens	_	33060621	1866	1952	87	6.9	106.44	[6.2-7.8]; 105.72	4	85.23	[4.0-4.3]; 86.06	_	106.39	6.1	21.21	False	Folded	None	9	0.067	6.7	0.021	0.0218411	0.046	_	0.0211976	0.0218363
P25054	Adenomatous polyposis coli protein (Protein APC) (Deleted in polyposis 2.5)	psself256	1351	2070	720	_	Homo sapiens	_	33060621	1966	2016	51	7.5	98.14	[6.4-9.0]; 96.97	4	60.73	[4.0-4.2]; 62.06	_	97.62	3.9	37.41	True	F->U	5.35	4	0.181	7.5	-0.085	-0.0815888	0.266	_	-0.0846492	0.180564
P25054	Adenomatous polyposis coli protein (Protein APC) (Deleted in polyposis 2.5)	psself256	1351	2070	720	_	Homo sapiens	_	33060621	2038	2071	34	5.6	106.72	[4.5-6.4]; 105.28	9	67.03	[8.8-9.0]; 68.84	_	97.05	10.3	39.69	True	U->F	8.65	9	0.029	4	-0.185	-0.096136	0.214	_	-0.155787	0.0288276
P25158	Maternal effect protein oskar	psother134	139	606	468	_	Drosophila melanogaster	_	30260314	270	299	30	6.1	78.76	[5.5-6.8]; 78.29	9	64.86	[8.9-9.0]; 65.38	_	76.88	10.3	13.9	False	Folded	None	9	0.104	4	0.014	0.0537353	0.09	_	0.0354969	0.104112
P25158	Maternal effect protein oskar	psother134	139	606	468	_	Drosophila melanogaster	_	30260314	342	374	33	7.4	84.82	[6.4-8.5]; 84.18	4	64.36	[4.0-4.3]; 65.1	_	84.61	5.2	20.46	False	Folded	None	5.3	0.15	7.6	0.059	0.0635117	0.091	_	0.0598071	0.105261
P25294	Protein SIS1	psself281	1	352	352	_	Saccharomyces cerevisiae	Stress granule	33229560	74	95	22	9	-24	[4.0-4.0]; -24.0	9	-24	[4.0-4.0]; -24.0	_	-24	7	0	False	Folded	None	4	0.482	4	0.482	0.482139	0	_	0.482139	0.482139
P25294	Protein SIS1	psself281	1	352	352	_	Saccharomyces cerevisiae	Stress granule	33229560	144	183	40	8	33.63	[6.7-9.0]; 33.31	4	19.93	[4.0-4.5]; 20.53	_	33.05	4.4	13.7	False	Folded	None	4.5	0.326	7.9	0.246	0.248855	0.08	_	0.245591	0.309521
P25294	Protein SIS1	psself281	1	352	352	_	Saccharomyces cerevisiae	Stress granule	33229560	294	327	34	4.1	43.92	[4.0-6.0]; 43.66	9	32.96	[8.9-9.0]; 33.27	_	40.76	12.5	10.96	False	Folded	None	9	0.219	4	0.178	0.190146	0.041	_	0.178222	0.218665
P25367	[PIN+] prion protein RNQ1 (Rich in asparagine and glutamine protein 1)	psother30	1	405	405	_	Saccharomyces cerevisiae	P-body	26238190	17	42	26	7.4	72.29	[6.3-9.0]; 71.76	4	55.57	[4.0-4.3]; 56.26	_	72.12	4.4	16.72	False	Folded	None	4.3	0.214	7.8	0.088	0.091548	0.126	_	0.0887588	0.202339
P25367	[PIN+] prion protein RNQ1 (Rich in asparagine and glutamine protein 1)	psother30	1	405	405	_	Saccharomyces cerevisiae	P-body	26238190	56	84	29	8.7	97.45	[7.8-9.0]; 96.66	4	68.5	[4.0-4.4]; 69.77	_	90.26	7	28.95	False	Folded	None	4.5	0.136	8.6	0.064	0.0863343	0.072	_	0.0644704	0.129134
P25367	[PIN+] prion protein RNQ1 (Rich in asparagine and glutamine protein 1)	psother30	1	405	405	_	Saccharomyces cerevisiae	P-body	26238190	147	173	27	4.1	99.4	[4.0-5.9]; 99.18	9	91.06	[8.7-9.0]; 91.46	_	96.32	12.2	8.34	False	Folded	None	9	0.043	4	0.004	0.0180099	0.039	_	0.00419173	0.0426487
P25367	[PIN+] prion protein RNQ1 (Rich in asparagine and glutamine protein 1)	psother30	1	405	405	_	Saccharomyces cerevisiae	P-body	26238190	185	405	221	4	76.38	[4.0-4.8]; 76.23	9	73.72	[8.6-9.0]; 73.85	_	74.46	7.9	2.66	False	Folded	None	9	0.146	4	0.121	0.142139	0.025	_	0.121468	0.145693
P25491	Mitochondrial protein import protein MAS5 (Yeast dnaJ protein 1)	psself282	1	409	409	_	Saccharomyces cerevisiae	Stress granule	33229560	384	409	26	8.8	137.93	[7.5-9.0]; 136.22	4	79.55	[4.0-4.4]; 82.25	_	128.39	3.7	58.38	True	F->U	4.45	4	0.078	8.8	-0.25	-0.215404	0.328	_	-0.249875	0.0783534
P25555	Single-strand telomeric DNA-binding protein GBP2 (G-strand-binding protein 2) (RAP1 localization factor 6)	psother160	1	427	427	_	Saccharomyces cerevisiae	_	30963611;26359986	1	63	63	8.5	196.04	[7.7-9.0]; 194.44	4	142.28	[4.0-4.5]; 144.6	_	182.6	10.5	53.76	False	Unfolded	None	4.6	-0.213	8.6	-0.371	-0.317973	0.158	_	-0.370693	-0.228891
P25555	Single-strand telomeric DNA-binding protein GBP2 (G-strand-binding protein 2) (RAP1 localization factor 6)	psother160	1	427	427	_	Saccharomyces cerevisiae	_	30963611;26359986	65	109	45	8.1	141.82	[7.4-8.6]; 141.16	4	121.77	[4.0-4.4]; 122.64	_	138.23	12.7	20.05	False	Unfolded	None	9	-0.237	8	-0.26	-0.252902	0.023	_	-0.26028	-0.25629
P25555	Single-strand telomeric DNA-binding protein GBP2 (G-strand-binding protein 2) (RAP1 localization factor 6)	psother160	1	427	427	_	Saccharomyces cerevisiae	_	30963611;26359986	299	326	28	8.5	173.53	[7.4-9.0]; 171.87	4	115.63	[4.0-4.4]; 118.02	_	164.31	4.8	57.9	False	Unfolded	None	4.7	-0.054	8.5	-0.261	-0.226936	0.207	_	-0.261222	-0.0871983
P25644	DNA topoisomerase 2-associated protein PAT1 (Decapping activator and translational repressor PAT1) (Topoisomerase II-associated protein PAT1) (mRNA turnover protein 1)	psother143	5	79	75	pH 7.4	Saccharomyces cerevisiae	P-body	30648970	5	44	40	9	121.25	[7.5-9.0]; 118.47	4	42.75	[4.0-4.3]; 45.72	Middle	108.62	3.5	78.5	True	F->U	4.75	4	0.166	9	-0.297	-0.250787	0.463	Unfolded	-0.29694	0.165634
P25644	DNA topoisomerase 2-associated protein PAT1 (Decapping activator and translational repressor PAT1) (Topoisomerase II-associated protein PAT1) (mRNA turnover protein 1)	psother143	5	79	75	pH 7.4	Saccharomyces cerevisiae	P-body	30648970	47	72	26	9	46.23	[8.4-9.0]; 45.24	4	21.23	[4.0-4.4]; 22.31	Middle	36.64	3.9	25	False	Folded	None	4	0.323	9	0.173	0.211295	0.15	Folded	0.172955	0.322715
P25644	DNA topoisomerase 2-associated protein PAT1 (Decapping activator and translational repressor PAT1) (Topoisomerase II-associated protein PAT1) (mRNA turnover protein 1)	psother368	296	754	459	pH 7.4	Saccharomyces cerevisiae	P-body	32513655	357	399	43	5.9	93.85	[5.2-6.7]; 92.99	9	69.09	[8.9-9.0]; 69.72	Middle	89.41	10.1	24.76	False	Non-confident transition	None	9	0.081	4	-0.012	0.0119589	0.093	Unfolded	-0.00213373	0.0814651
P25644	DNA topoisomerase 2-associated protein PAT1 (Decapping activator and translational repressor PAT1) (Topoisomerase II-associated protein PAT1) (mRNA turnover protein 1)	psother368	296	754	459	pH 7.4	Saccharomyces cerevisiae	P-body	32513655	401	429	29	8.3	100.87	[7.4-9.0]; 99.93	4	72.59	[4.0-4.3]; 73.77	10% maximum solubility	96.63	10.1	28.28	False	Folded	None	4.5	0.084	8.3	0.011	0.0268241	0.073	Folded	0.0112534	0.0753212
P25685	DnaJ homolog subfamily B member 1 (DnaJ protein homolog 1) (Heat shock 40 kDa protein 1) (HSP40) (Heat shock protein 40) (Human DnaJ protein 1) (hDj-1)	psself283	1	340	340	_	Homo sapiens	Stress granule	33229560	23	44	22	6.4	150.24	[5.9-7.1]; 149.54	9	127.52	[4.0-9.0]; 128.85	_	148.82	9.8	22.72	False	Unfolded	None	9	-0.117	4	-0.283	-0.207804	0.166	_	-0.224576	-0.116767
P25685	DnaJ homolog subfamily B member 1 (DnaJ protein homolog 1) (Heat shock 40 kDa protein 1) (HSP40) (Heat shock protein 40) (Human DnaJ protein 1) (hDj-1)	psself283	1	340	340	_	Homo sapiens	Stress granule	33229560	65	91	27	7.3	76.69	[6.4-8.5]; 76.1	4	59.41	[4.0-4.3]; 60.01	_	76.54	4.4	17.28	False	Folded	None	4.4	0.182	7.5	0.086	0.0870714	0.096	_	0.0858722	0.169565
P25685	DnaJ homolog subfamily B member 1 (DnaJ protein homolog 1) (Heat shock 40 kDa protein 1) (HSP40) (Heat shock protein 40) (Human DnaJ protein 1) (hDj-1)	psself283	1	340	340	_	Homo sapiens	Stress granule	33229560	144	165	22	6.4	96.87	[5.7-7.1]; 96.34	9	80.57	[8.9-9.0]; 81.28	_	95.75	12.2	16.3	False	Unfolded	None	9	-0.024	4	-0.09	-0.0817252	0.066	_	-0.0861243	-0.023712
P25888	ATP-dependent RNA helicase RhlE (EC 3.6.4.13)	psother234	1	454	454	_	Escherichia coli	_	31435012	374	454	81	6.4	128.18	[5.7-7.2]; 127.57	9	111.3	[8.9-9.0]; 112.05	_	127.22	12.2	16.88	False	Unfolded	None	9	-0.123	4	-0.199	-0.183628	0.076	_	-0.187811	-0.123221
P26196	Probable ATP-dependent RNA helicase DDX6 (EC 3.6.4.13) (ATP-dependent RNA helicase p54) (DEAD box protein 6) (Oncogene RCK)	psother339	1	483	483	_	Homo sapiens	P-body;Stress granule	32302565;32302570	1	79	79	5.8	58.8	[4.9-6.6]; 58.28	9	44.32	[8.9-9.0]; 44.7	_	55.88	10.7	14.48	False	Folded	None	9	0.202	4	0.143	0.160998	0.059	_	0.149416	0.202213
P26368	Splicing factor U2AF 65 kDa subunit (U2 auxiliary factor 65 kDa subunit) (hU2AF(65)) (hU2AF65) (U2 snRNP auxiliary factor large subunit)	psself150	1	475	475	_	Homo sapiens	_	31271494	2	96	95	6.4	218.7	[5.7-7.3]; 217.89	9	196.64	[9.0-9.0]; 196.64	_	217.71	12.2	22.06	False	Unfolded	None	9	-0.506	4	-0.643	-0.589933	0.137	_	-0.601707	-0.505694
P26368	Splicing factor U2AF 65 kDa subunit (U2 auxiliary factor 65 kDa subunit) (hU2AF(65)) (hU2AF65) (U2 snRNP auxiliary factor large subunit)	psself150	1	475	475	_	Homo sapiens	_	31271494	99	145	47	7	-16.1	[6.1-8.3]; -16.24	4	-20.68	[4.0-4.2]; -20.53	_	-16.1	5.2	4.58	False	Folded	None	5.1	0.499	8.2	0.469	0.471656	0.03	_	0.471656	0.490235
P26599	Polypyrimidine tract-binding protein 1 (PTB) (57 kDa RNA-binding protein PPTB-1) (Heterogeneous nuclear ribonucleoprotein I) (hnRNP I)	psother13	1	531	531	_	Homo sapiens	_	22398450;29424691	410	435	26	7.5	100.6	[6.4-8.7]; 99.93	4	78.79	[4.0-4.3]; 79.81	_	100.27	5.2	21.81	False	Folded	None	5	0.081	7.5	0.013	0.0155445	0.068	_	0.0133491	0.0547874
P28007	H/ACA ribonucleoprotein complex subunit GAR1 (snoRNP protein GAR1)	psother161	1	205	205	_	Saccharomyces cerevisiae	Nucleolus	30963611;26359986	124	205	82	4	124.07	[4.0-6.0]; 123.34	9	92.69	[8.9-9.0]; 93.6	_	115.13	14.5	31.38	False	Unfolded	None	9	-0.178	4	-0.288	-0.257697	0.11	_	-0.28752	-0.177928
P28163	30 kDa spicule matrix protein	psself131	21	290	270	_	Strongylocentrotus purpuratus	_	30826453;27426695	23	43	21	9	-22.5	[8.3-9.0]; -23.08	4	-36.09	[4.0-4.4]; -35.56	_	-27.35	1.8	13.59	False	Folded	None	4	0.517	9	0.439	0.462026	0.078	_	0.439388	0.516618
P28163	30 kDa spicule matrix protein	psself131	21	290	270	_	Strongylocentrotus purpuratus	_	30826453;27426695	217	250	34	5	-18.1	[4.0-7.7]; -18.13	9	-20.15	[9.0-9.0]; -20.15	_	-18.14	14.5	2.05	False	Folded	None	9	0.436	4	0.428	0.428158	0.008	_	0.428027	0.435913
P28163	30 kDa spicule matrix protein	psself131	21	290	270	_	Strongylocentrotus purpuratus	_	30826453;27426695	263	284	22	5.6	126.04	[4.2-6.5]; 125.13	9	103.33	[8.9-9.0]; 104.2	_	121.86	12.7	22.71	False	Unfolded	None	9	-0.18	4	-0.317	-0.246919	0.137	_	-0.288395	-0.179799
P28347	Transcriptional enhancer factor TEF-1 (NTEF-1) (Protein GT-IIC) (TEA domain family member 1) (TEAD-1) (Transcription factor 13) (TCF-13)	psother294	1	426	426	_	Homo sapiens	_	31792379	1	36	36	9	101.55	[7.5-9.0]; 99.44	4	39.84	[4.0-4.3]; 42.15	_	91.28	3.5	61.71	True	F->U	5.15	4	0.181	9	-0.164	-0.124964	0.345	_	-0.163794	0.180521
P29227	Heterochromatin protein 1 (HP1)	psself59	1	213	213	_	Drosophila virilis	Heterochromatin	28636597	1	31	31	7.2	125.65	[6.4-8.5]; 123.83	4	70.91	[4.0-4.3]; 73.51	_	125.41	3.7	54.74	True	F->U	4.55	4	0.12	7.4	-0.269	-0.265892	0.389	_	-0.268169	0.120336
P29227	Heterochromatin protein 1 (HP1)	psself59	1	213	213	_	Drosophila virilis	Heterochromatin	28636597	52	151	100	7	110.02	[6.2-7.9]; 109.17	4	86.94	[4.0-4.5]; 87.92	_	110.02	4.8	23.08	Possible Multitransition	Variable	[5.5499999999999945; 8.849999999999984]	4.7	0.056	6.9	-0.032	-0.0314361	0.088	_	-0.0314361	0.0248376
P29617	Homeobox protein prospero	psself237	1	1703	1703	_	Drosophila melanogaster	_	32726576;31866201	1	298	298	7.1	101.43	[5.4-7.6]; 101.24	9	97.12	[9.0-9.0]; 97.12	_	101.4	7	4.31	False	Folded	None	9	0.052	4	0.008	0.0373132	0.044	_	0.0370068	0.0519454
P29617	Homeobox protein prospero	psself237	1	1703	1703	_	Drosophila melanogaster	_	32726576;31866201	315	357	43	4	42.68	[4.0-5.1]; 42.59	9	39.96	[7.1-9.0]; 40.02	_	40.29	10.5	2.72	False	Folded	None	9	0.241	4	0.21	0.238202	0.031	_	0.210071	0.241365
P29617	Homeobox protein prospero	psself237	1	1703	1703	_	Drosophila melanogaster	_	32726576;31866201	381	408	28	8.4	44.44	[7.2-9.0]; 43.81	4	23.41	[4.0-4.3]; 24.2	_	41.78	4.3	21.03	False	Folded	None	4.2	0.306	8.5	0.195	0.205857	0.111	_	0.19547	0.301903
P29617	Homeobox protein prospero	psself237	1	1703	1703	_	Drosophila melanogaster	_	32726576;31866201	424	754	331	8.4	107.97	[7.2-9.0]; 107.21	4.6	78.72	[4.0-4.9]; 79.46	_	104.57	4.8	29.25	False	Non-confident transition	None	4.7	0.125	8.6	-0.012	0.00511871	0.137	_	-0.012109	0.124363
P29617	Homeobox protein prospero	psself237	1	1703	1703	_	Drosophila melanogaster	_	32726576;31866201	815	857	43	7.2	113.99	[6.4-8.4]; 112.95	4	82.2	[4.0-4.4]; 83.6	_	113.84	4.3	31.79	True	F->U	5.15	4.3	0.089	7.1	-0.076	-0.0757052	0.165	_	-0.0757668	0.0692947
P29617	Homeobox protein prospero	psself237	1	1703	1703	_	Drosophila melanogaster	_	32726576;31866201	868	1139	272	7.8	94.26	[6.7-8.9]; 93.59	4.6	73.79	[4.0-5.1]; 74.3	_	93.39	5	20.47	False	Folded	None	5	0.138	7.8	0.044	0.0482394	0.094	_	0.0436869	0.131791
P29617	Homeobox protein prospero	psself237	1	1703	1703	_	Drosophila melanogaster	_	32726576;31866201	1193	1237	45	6	49.21	[5.2-6.8]; 48.82	9	38.44	[8.9-9.0]; 38.86	_	47.73	12.2	10.77	False	Folded	None	9	0.217	5.9	0.18	0.184822	0.037	_	0.179591	0.216612
P29617	Homeobox protein prospero	psself237	1	1703	1703	_	Drosophila melanogaster	_	32726576;31866201	1239	1476	238	4.9	52.38	[4.0-5.6]; 52.2	9	42.25	[8.6-9.0]; 42.74	_	45.5	9.6	10.13	False	Folded	None	9	0.242	4	0.166	0.227207	0.076	_	0.174894	0.241743
P30658	Chromobox protein homolog 2 (M33) (Modifier 3 protein)	psself126	1	519	519	_	Mus musculus	Nuclear speckle	30514760	54	214	161	5.9	129.36	[5.1-6.7]; 128.33	9	101	[8.9-9.0]; 101.88	_	124.55	10.9	28.36	False	Unfolded	None	9	-0.063	4	-0.203	-0.154168	0.14	_	-0.179775	-0.0630007
P30658	Chromobox protein homolog 2 (M33) (Modifier 3 protein)	psself126	1	519	519	_	Mus musculus	Nuclear speckle	30514760	216	246	31	5.7	49.41	[4.8-6.4]; 48.69	9	28.17	[8.8-9.0]; 28.98	_	44.09	9	21.24	False	Folded	None	9	0.288	4	0.154	0.222304	0.134	_	0.184676	0.28759
P30658	Chromobox protein homolog 2 (M33) (Modifier 3 protein)	psself126	1	519	519	_	Mus musculus	Nuclear speckle	30514760	287	347	61	6.5	62.59	[5.9-7.1]; 62.32	4	53.93	[4.0-9.0]; 54.25	_	62.05	9.6	8.66	False	Folded	None	9	0.204	4	0.133	0.164986	0.071	_	0.158408	0.132734
P30658	Chromobox protein homolog 2 (M33) (Modifier 3 protein)	psself126	1	519	519	_	Mus musculus	Nuclear speckle	30514760	352	480	129	6.8	55.38	[6.2-7.5]; 55.09	4	47.14	[4.0-4.4]; 47.47	_	55.31	6.1	8.24	False	Folded	None	9	0.21	4	0.192	0.19259	0.018	_	0.193035	0.192396
P31016	Disks large homolog 4 (Postsynaptic density protein 95) (PSD-95) (Synapse-associated protein 90) (SAP-90) (SAP90)	psother469	1	724	724	_	Rattus norvegicus	Postsynaptic density	33235361	15	43	29	9	63.7	[8.1-9.0]; 61.62	4	17.41	[4.0-4.4]; 19.57	_	50.77	3.8	46.29	False	Folded	None	4	0.324	9	0.023	0.0762462	0.301	_	0.0226927	0.324193
P31483	Nucleolysin TIA-1 isoform p40 (RNA-binding protein TIA-1) (T-cell-restricted intracellular antigen-1) (TIA-1) (p40-TIA-1)	psother7	1	386	386	_	Homo sapiens	Stress granule	19048988;11121440	352	377	26	9	-5.06	[4.0-4.0]; -5.06	9	-5.06	[4.0-4.0]; -5.06	_	-5.06	7	0	False	Folded	None	4	0.428	4	0.428	0.427615	0	_	0.427615	0.427615
P31483	Nucleolysin TIA-1 isoform p40 (RNA-binding protein TIA-1) (T-cell-restricted intracellular antigen-1) (TIA-1) (p40-TIA-1)	psself5	278	375	98	_	Homo sapiens	_	22579281	350	376	27	9	-4.15	[4.0-4.0]; -4.15	9	-4.15	[4.0-4.0]; -4.15	_	-4.15	7	0	False	Folded	None	4	0.418	4	0.418	0.418473	0	_	0.418473	0.418473
P31539	Heat shock protein 104 (Protein aggregation-remodeling factor HSP104)	psother162	1	908	908	_	Saccharomyces cerevisiae	Stress granule	30963611;26359986	458	495	38	6.9	153.3	[6.2-7.7]; 152.02	4	115.33	[4.0-4.3]; 116.8	_	153.17	5.2	37.97	False	Unfolded	None	5	-0.091	7	-0.229	-0.229179	0.138	_	-0.229087	-0.164664
P31539	Heat shock protein 104 (Protein aggregation-remodeling factor HSP104)	psother162	1	908	908	_	Saccharomyces cerevisiae	Stress granule	30963611;26359986	519	540	22	7.9	122.84	[6.7-9.0]; 121.51	4	76.41	[4.0-4.4]; 78.42	_	120.57	4.3	46.43	True	F->U	5.15	4.3	0.114	7.7	-0.114	-0.108631	0.228	_	-0.113445	0.0898443
P31539	Heat shock protein 104 (Protein aggregation-remodeling factor HSP104)	psother162	1	908	908	_	Saccharomyces cerevisiae	Stress granule	30963611;26359986	887	908	22	9	183.9	[8.2-9.0]; 176.27	4	14.98	[4.0-4.4]; 21.64	_	129.05	1.8	168.92	True	F->U	4.15	4	0.062	9	-0.727	-0.528306	0.789	_	-0.727469	0.0622691
P31689	DnaJ homolog subfamily A member 1 (DnaJ protein homolog 2) (HSDJ) (Heat shock 40 kDa protein 4) (Heat shock protein J2) (HSJ-2) (Human DnaJ protein 2) (hDj-2)	psself284	1	397	397	_	Homo sapiens	Stress granule	33229560	372	397	26	8.5	157.78	[7.5-9.0]; 156.77	4	123.58	[4.0-4.3]; 124.78	_	151.64	6.8	34.2	False	Unfolded	None	6.3	-0.128	4	-0.208	-0.17262	0.08	_	-0.204813	-0.207555
P31943	Heterogeneous nuclear ribonucleoprotein H (hnRNP H) [Cleaved into: Heterogeneous nuclear ribonucleoprotein H; N-terminally processed]	psself102	1	449	449	_	Homo sapiens	_	29961577	195	217	23	8	69.46	[7.1-8.6]; 68.88	4	52.99	[4.0-4.3]; 53.74	_	67.73	11.4	16.47	False	Folded	None	4.5	0.056	8	0.016	0.0218799	0.04	_	0.015683	0.0506902
P32588	Nuclear and cytoplasmic polyadenylated RNA-binding protein PUB1 (ARS consensus-binding protein ACBP-60) (Poly uridylate-binding protein) (Poly(U)-binding protein)	psself46	243	327	85	pH 7.4	Saccharomyces cerevisiae	Stress granule	26412307;29424691	243	328	86	5.9	49.46	[4.0-7.7]; 49.44	9	47.16	[9.0-9.0]; 47.16	10% maximum solubility	49.42	12.4	2.3	False	Folded	None	9	0.194	4	0.186	0.186281	0.008	Folded	0.186153	0.194392
P32588	Nuclear and cytoplasmic polyadenylated RNA-binding protein PUB1 (ARS consensus-binding protein ACBP-60) (Poly uridylate-binding protein) (Poly(U)-binding protein)	psself94	1	434	434	pH 7.4	Saccharomyces cerevisiae	Stress granule	29898402	1	68	68	9	97.23	[7.5-9.0]; 95.25	4	47.78	[4.0-4.3]; 49.69	Middle	89.57	3.1	49.45	True	F->U	5.55	4	0.18	9	-0.11	-0.0797907	0.29	Unfolded	-0.109918	0.179697
P32588	Nuclear and cytoplasmic polyadenylated RNA-binding protein PUB1 (ARS consensus-binding protein ACBP-60) (Poly uridylate-binding protein) (Poly(U)-binding protein)	psself94	1	434	434	pH 7.4	Saccharomyces cerevisiae	Stress granule	29898402	216	334	119	8.2	60.43	[7.5-8.7]; 60.19	4	53.67	[4.0-4.4]; 53.94	Middle	58.98	12	6.76	False	Folded	None	4.6	0.159	8.1	0.151	0.15393	0.008	Folded	0.151175	0.156002
P32588	Nuclear and cytoplasmic polyadenylated RNA-binding protein PUB1 (ARS consensus-binding protein ACBP-60) (Poly uridylate-binding protein) (Poly(U)-binding protein)	psself94	244	335	92	pH 7.4	Saccharomyces cerevisiae	Stress granule	29898402	244	336	93	8	51.24	[7.5-8.3]; 51.18	4	49.5	[4.0-4.3]; 49.58	Middle	50.79	12.2	1.74	False	Folded	None	9	0.195	4	0.182	0.189792	0.013	Folded	0.189766	0.181516
P32588	Nuclear and cytoplasmic polyadenylated RNA-binding protein PUB1 (ARS consensus-binding protein ACBP-60) (Poly uridylate-binding protein) (Poly(U)-binding protein)	psself94	1	434	434	pH 7.4	Saccharomyces cerevisiae	Stress granule	29898402	410	435	26	7.4	59.75	[6.4-8.4]; 59.36	4	46.87	[4.0-4.3]; 47.46	10% maximum solubility	59.65	7	12.88	False	Folded	None	4.8	0.233	7.3	0.213	0.213611	0.02	Folded	0.213296	0.221337
P32770	Asparagine-rich protein (Protein ARP)	psother32	1	719	719	_	Saccharomyces cerevisiae	Stress granule	26238190	386	439	54	5.3	58.72	[4.6-5.9]; 58.59	9	55.52	[8.9-9.0]; 55.62	_	57.25	11.4	3.2	False	Folded	None	9	0.171	4	0.117	0.160746	0.054	_	0.129979	0.170559
P32770	Asparagine-rich protein (Protein ARP)	psother32	1	719	719	_	Saccharomyces cerevisiae	Stress granule	26238190	441	563	123	4.5	71.43	[4.0-5.3]; 71.31	9	65.07	[8.4-9.0]; 65.43	_	66.17	10.5	6.36	False	Folded	None	9	0.153	4	0.092	0.146274	0.061	_	0.0934685	0.153153
P32770	Asparagine-rich protein (Protein ARP)	psother32	1	719	719	_	Saccharomyces cerevisiae	Stress granule	26238190	612	665	54	8.8	93.31	[7.7-9.0]; 92.34	4	61.1	[4.0-4.4]; 62.34	_	86.29	4.4	32.21	False	Folded	None	4.2	0.179	8.7	0.033	0.056674	0.146	_	0.0332467	0.170819
P33240	Cleavage stimulation factor subunit 2 (CF-1 64 kDa subunit) (Cleavage stimulation factor 64 kDa subunit) (CSTF 64 kDa subunit) (CstF-64)	psself103	1	577	577	_	Homo sapiens	_	29961577	197	542	346	8.2	48.59	[7.6-8.7]; 48.38	4.6	42.58	[4.1-5.0]; 42.79	_	47.08	10.5	6.01	False	Folded	None	5.1	0.24	4	0.224	0.234715	0.016	_	0.229611	0.237208
P34216	EH domain-containing and endocytosis protein 1 (Bud site selection protein 15)	psother479	397	1381	985	_	Saccharomyces cerevisiae	_	33275885;33207182	397	551	155	6.7	34.57	[5.7-7.2]; 34.4	9	30.02	[8.9-9.0]; 30.18	_	34.43	7	4.55	False	Folded	None	9	0.287	4	0.256	0.271938	0.031	_	0.272391	0.286824
P34216	EH domain-containing and endocytosis protein 1 (Bud site selection protein 15)	psother479	397	1381	985	_	Saccharomyces cerevisiae	_	33275885;33207182	584	637	54	6.5	85.73	[6.0-7.2]; 85.32	4	73.47	[4.0-9.0]; 73.97	_	85.11	9.4	12.26	False	Folded	None	9	0.14	4	0.098	0.104226	0.042	_	0.10249	0.0975456
P34216	EH domain-containing and endocytosis protein 1 (Bud site selection protein 15)	psother479	397	1381	985	_	Saccharomyces cerevisiae	_	33275885;33207182	645	672	28	6.3	84.7	[5.7-6.9]; 84.3	9	73.24	[4.0-9.0]; 73.83	_	83.55	8.8	11.46	False	Folded	None	9	0.136	4	0.054	0.100781	0.082	_	0.089164	0.135622
P34216	EH domain-containing and endocytosis protein 1 (Bud site selection protein 15)	psother479	397	1381	985	_	Saccharomyces cerevisiae	_	33275885;33207182	690	721	32	6.8	94.98	[6.1-7.6]; 94.07	4	69.29	[4.0-4.3]; 70.26	_	94.74	4.4	25.69	Possible Multitransition	Variable	[5.949999999999993; 8.649999999999984]	4.4	0.136	7	-0.028	-0.0280275	0.164	_	-0.0274271	0.109127
P34216	EH domain-containing and endocytosis protein 1 (Bud site selection protein 15)	psother479	397	1381	985	_	Saccharomyces cerevisiae	_	33275885;33207182	723	747	25	6.6	102.85	[6.0-7.2]; 102.4	4	89.26	[4.0-4.2]; 89.68	_	102.36	7	13.59	False	Folded	None	9	0.057	4	0.018	0.0234863	0.039	_	0.0224474	0.0184601
P34216	EH domain-containing and endocytosis protein 1 (Bud site selection protein 15)	psother479	397	1381	985	_	Saccharomyces cerevisiae	_	33275885;33207182	785	840	56	7.4	138.3	[6.4-8.7]; 137.18	4	103.86	[4.0-4.4]; 105.47	_	137.88	4.8	34.44	False	Unfolded	None	4.7	-0.008	7.8	-0.194	-0.186974	0.186	_	-0.192837	-0.0471989
P34216	EH domain-containing and endocytosis protein 1 (Bud site selection protein 15)	psother479	397	1381	985	_	Saccharomyces cerevisiae	_	33275885;33207182	848	1324	477	8.4	106.33	[6.7-9.0]; 104.81	4	48.81	[4.0-4.1]; 50.59	_	102.64	3.9	57.52	True	F->U	6.65	4	0.232	8.5	-0.024	-0.00954359	0.256	_	-0.0243558	0.232076
P34216	EH domain-containing and endocytosis protein 1 (Bud site selection protein 15)	psother479	397	1381	985	_	Saccharomyces cerevisiae	_	33275885;33207182	1343	1366	24	7.3	77.36	[6.4-8.9]; 75.68	4	32.76	[4.0-4.3]; 34.65	_	77.02	3.8	44.6	True	F->U	5.85	4	0.284	7.4	-0.063	-0.0596339	0.347	_	-0.0625711	0.283772
P34689	ATP-dependent RNA helicase glh-1 (EC 3.6.4.13) (Germline helicase 1)	psother326	1	763	763	_	Caenorhabditis elegans	P granule	32245789	1	69	69	6.2	41.43	[5.5-6.8]; 41.18	9	34.24	[8.9-9.0]; 34.45	_	40.44	9.5	7.19	False	Folded	None	9	0.292	4	0.254	0.265302	0.038	_	0.259783	0.291788
P34689	ATP-dependent RNA helicase glh-1 (EC 3.6.4.13) (Germline helicase 1)	psother326	1	763	763	_	Caenorhabditis elegans	P granule	32245789	85	152	68	6.6	28.96	[6.0-7.1]; 28.86	4	26.1	[4.0-4.4]; 26.21	_	28.8	5.2	2.86	False	Folded	None	5.3	0.318	6.9	0.302	0.30181	0.016	_	0.302511	0.30672
P34689	ATP-dependent RNA helicase glh-1 (EC 3.6.4.13) (Germline helicase 1)	psother326	1	763	763	_	Caenorhabditis elegans	P granule	32245789	196	236	41	8.1	79.18	[6.9-9.0]; 78.26	4	50.49	[4.0-4.4]; 51.62	_	76.98	4.8	28.69	False	Folded	None	4.8	0.212	8.1	0.113	0.121016	0.099	_	0.112981	0.181964
P34689	ATP-dependent RNA helicase glh-1 (EC 3.6.4.13) (Germline helicase 1)	psother326	1	763	763	_	Caenorhabditis elegans	P granule	32245789	275	301	27	7.1	70.77	[6.3-8.2]; 69.48	4	35.33	[4.0-4.3]; 36.64	_	70.73	4	35.44	False	Folded	None	4.1	0.26	7.2	0.028	0.0289357	0.232	_	0.0285273	0.251797
P34761	Protein WHI3	psother358	1	661	661	_	Saccharomyces cerevisiae	_	32399546	17	58	42	8.4	97.14	[7.8-8.9]; 96.98	4	92.13	[4.0-4.2]; 92.34	_	95.73	7	5.01	True	U->F	5.15	6.5	0.063	4	-0.031	0.0498103	0.094	_	0.0396395	-0.0306544
P34761	Protein WHI3	psother358	1	661	661	_	Saccharomyces cerevisiae	_	32399546	238	282	45	5.2	80.87	[4.5-5.7]; 80.7	9	76.09	[8.6-9.0]; 76.31	_	77.85	7.7	4.78	False	Folded	None	9	0.125	4	0.054	0.111412	0.071	_	0.0634372	0.125137
P34761	Protein WHI3	psother358	1	661	661	_	Saccharomyces cerevisiae	_	32399546	284	308	25	9	77.97	[8.4-9.0]; 77.46	4	66.06	[4.0-4.3]; 66.57	_	73.48	6.2	11.91	False	Folded	None	5.7	0.168	9	0.071	0.0979546	0.097	_	0.0713511	0.116267
P34761	Protein WHI3	psother358	1	661	661	_	Saccharomyces cerevisiae	_	32399546	336	361	26	9	18.08	[6.8-9.0]; 17.91	4	9.83	[4.0-4.3]; 10.12	_	17.56	1.8	8.25	False	Folded	None	4	0.366	9	0.313	0.315	0.053	_	0.313019	0.366439
P34761	Protein WHI3	psother358	1	661	661	_	Saccharomyces cerevisiae	_	32399546	369	510	142	5	54.09	[4.0-5.8]; 53.95	9	46.93	[8.8-9.0]; 47.22	_	51	10.7	7.16	False	Folded	None	9	0.216	4	0.169	0.198152	0.047	_	0.173105	0.215572
P34761	Protein WHI3	psother358	1	661	661	_	Saccharomyces cerevisiae	_	32399546	517	548	32	9	10.41	[8.2-9.0]; 9.46	4	-17.74	[4.0-4.4]; -16.56	_	1.17	3.6	28.15	False	Folded	None	4	0.443	9	0.307	0.34296	0.136	_	0.307122	0.44303
P34761	Protein WHI3	psother358	1	661	661	_	Saccharomyces cerevisiae	_	32399546	560	583	24	5.4	115.9	[4.2-6.1]; 115.18	9	97.21	[8.9-9.0]; 97.74	_	110.08	12.8	18.69	False	Unfolded	None	9	-0.044	4	-0.213	-0.0991636	0.169	_	-0.180169	-0.0437655
P34761	Protein WHI3	psother358	1	661	661	_	Saccharomyces cerevisiae	_	32399546	622	654	33	4	68.28	[4.0-6.0]; 67.96	9	54.43	[8.9-9.0]; 54.84	_	64.42	12.8	13.85	False	Folded	None	9	0.097	4	0.054	0.0647026	0.043	_	0.0541197	0.0967494
P35193	Autophagy-related protein 19 (Cytoplasm-to-vacuole targeting protein 19)	psother303	1	415	415	_	Saccharomyces cerevisiae	_	31995729	124	148	25	8.4	115.12	[6.9-9.0]; 113.64	4	58.58	[4.0-4.3]; 60.9	_	110.35	3.9	56.54	True	F->U	4.95	4	0.184	8.5	-0.206	-0.184119	0.39	_	-0.205542	0.183673
P35193	Autophagy-related protein 19 (Cytoplasm-to-vacuole targeting protein 19)	psother303	1	415	415	_	Saccharomyces cerevisiae	_	31995729	236	266	31	6.7	111.39	[6.0-7.4]; 110.4	4	84.14	[4.0-4.3]; 85.35	_	110.78	4.8	27.25	True	F->U	5.55	4.8	0.065	6.9	-0.06	-0.059436	0.125	_	-0.058194	0.0180715
P35222	Catenin beta-1 (Beta-catenin)	psself307	1	781	781	_	Homo sapiens	Mediator condensate	33357399;31563432	31	63	33	9	84.98	[7.6-9.0]; 83.47	4	43.2	[4.0-4.3]; 44.88	_	77.76	3.7	41.78	True	F->U	6.75	4	0.225	9	-0.036	-0.00851614	0.261	_	-0.0362368	0.224507
P35222	Catenin beta-1 (Beta-catenin)	psself307	1	781	781	_	Homo sapiens	Mediator condensate	33357399;31563432	105	128	24	8.8	43.27	[7.6-9.0]; 42.57	4	17.76	[4.0-4.4]; 18.76	_	38.78	4.4	25.51	False	Folded	None	4.3	0.332	8.8	0.163	0.183528	0.169	_	0.162948	0.319567
P35222	Catenin beta-1 (Beta-catenin)	psself307	1	781	781	_	Homo sapiens	Mediator condensate	33357399;31563432	727	771	45	9	75.43	[8.3-9.0]; 72.73	4	8.42	[4.0-4.4]; 11.51	_	53.26	3.7	67.01	True	F->U	7.25	4	0.326	9	-0.073	0.0152423	0.399	_	-0.0734411	0.325909
P35453	Homeobox protein Hox-D13 (Homeobox protein Hox-4I)	psself207	1	343	343	_	Homo sapiens	Transcriptional condensate	32386547	3	26	24	9	77.81	[8.1-9.0]; 76.52	4	35.22	[4.0-4.4]; 36.99	_	64.4	4.2	42.59	False	Folded	None	4	0.261	8.9	0.07	0.117919	0.191	_	0.0701415	0.261023
P35453	Homeobox protein Hox-D13 (Homeobox protein Hox-4I)	psself207	1	343	343	_	Homo sapiens	Transcriptional condensate	32386547	79	116	38	7	57.98	[6.3-7.8]; 57.55	4	45.86	[4.0-4.4]; 46.39	_	57.98	7	12.12	False	Folded	None	9	0.23	4	0.202	0.208215	0.028	_	0.208215	0.201902
P35637	RNA-binding protein FUS (75 kDa DNA-pairing protein) (Oncogene FUS) (Oncogene TLS) (POMp75) (Translocated in liposarcoma protein)	psother605	1	526	526	pH 7.4	Homo sapiens	Stress granule	33857479	1	293	293	8.7	76.94	[7.9-9.0]; 76.71	4.3	68.43	[4.0-4.9]; 68.64	Middle	74.24	7	8.51	False	Folded	None	4.6	0.153	8.6	0.128	0.136534	0.025	Folded	0.127577	0.151769
P35637	RNA-binding protein FUS (75 kDa DNA-pairing protein) (Oncogene FUS) (Oncogene TLS) (POMp75) (Translocated in liposarcoma protein)	psother605	1	526	526	pH 7.4	Homo sapiens	Stress granule	33857479	333	355	23	8.7	30.49	[7.4-9.0]; 29.06	4	-15.45	[4.0-4.3]; -13.38	10% maximum solubility	23.46	3.7	45.94	False	Folded	None	4	0.418	8.9	0.164	0.193727	0.254	Folded	0.164108	0.417622
P35637	RNA-binding protein FUS (75 kDa DNA-pairing protein) (Oncogene FUS) (Oncogene TLS) (POMp75) (Translocated in liposarcoma protein)	psother605	1	526	526	pH 7.4	Homo sapiens	Stress granule	33857479	364	433	70	6.6	71.58	[5.6-7.7]; 71.36	9	65.12	[9.0-9.0]; 65.12	10% maximum solubility	71.49	12.4	6.46	False	Folded	None	9	0.05	6.8	0.028	0.0279828	0.022	Folded	0.0280192	0.0500769
P35637	RNA-binding protein FUS (75 kDa DNA-pairing protein) (Oncogene FUS) (Oncogene TLS) (POMp75) (Translocated in liposarcoma protein)	psother605	1	526	526	pH 7.4	Homo sapiens	Stress granule	33857479	444	526	83	8.2	132.47	[7.3-8.7]; 131.76	4	110.9	[4.0-4.3]; 111.65	10% maximum solubility	129.36	10.9	21.57	False	Unfolded	None	4.7	-0.112	8.2	-0.148	-0.135584	0.036	Unfolded	-0.147593	-0.124349
P35637	RNA-binding protein FUS (75 kDa DNA-pairing protein) (Oncogene FUS) (Oncogene TLS) (POMp75) (Translocated in liposarcoma protein)	psself160	211	421	211	pH 7.4	Homo sapiens	_	31437398	211	293	83	8.3	112.74	[7.5-8.9]; 112.06	4	92.49	[4.0-4.4]; 93.22	Middle	108.74	11.4	20.25	False	Unfolded	None	4.7	-0.006	8.3	-0.048	-0.0349025	0.042	Unfolded	-0.0479099	-0.0159847
P35637	RNA-binding protein FUS (75 kDa DNA-pairing protein) (Oncogene FUS) (Oncogene TLS) (POMp75) (Translocated in liposarcoma protein)	psself160	211	421	211	pH 7.4	Homo sapiens	_	31437398	332	355	24	8	32.43	[6.6-9.0]; 31.43	4	-1.7	[4.0-4.2]; -0.41	10% maximum solubility	30.9	4.2	34.13	False	Folded	None	4	0.403	8.2	0.196	0.20417	0.207	Folded	0.196676	0.402621
P35637	RNA-binding protein FUS (75 kDa DNA-pairing protein) (Oncogene FUS) (Oncogene TLS) (POMp75) (Translocated in liposarcoma protein)	psself160	211	421	211	pH 7.4	Homo sapiens	_	31437398	364	422	59	6.6	83.35	[5.3-7.7]; 83.14	9	76.74	[9.0-9.0]; 76.74	10% maximum solubility	83.27	13	6.61	False	Unfolded	None	9	-0.013	6.9	-0.036	-0.0359489	0.023	Unfolded	-0.0358968	-0.0128226
P35637	RNA-binding protein FUS (75 kDa DNA-pairing protein) (Oncogene FUS) (Oncogene TLS) (POMp75) (Translocated in liposarcoma protein)	psself160	472	505	34	pH 7.4	Homo sapiens	_	31437398	472	506	35	8.2	149.68	[7.5-8.7]; 148.85	4	125.43	[4.0-4.4]; 126.42	Middle	144.44	12.5	24.25	False	Unfolded	None	4.5	-0.251	8.2	-0.322	-0.302211	0.071	Unfolded	-0.321699	-0.256206
P35637	RNA-binding protein FUS (75 kDa DNA-pairing protein) (Oncogene FUS) (Oncogene TLS) (POMp75) (Translocated in liposarcoma protein)	psself220	164	500	337	pH 7.4	Homo sapiens	_	32585960;29677513	444	501	58	8.1	110.68	[7.3-8.7]; 110.09	4	94.91	[4.0-4.3]; 95.56	10% maximum solubility	108.28	10.5	15.77	False	Unfolded	None	4.5	-0.07	8.2	-0.108	-0.0959192	0.038	Unfolded	-0.108046	-0.075253
P35922	Synaptic functional regulator FMR1 (Fragile X mental retardation protein 1 homolog) (FMRP) (Protein FMR-1) (mFmr1p)	psother305	445	632	188	_	Mus musculus	Neuronal granule	31999954	445	614	170	7.9	143.21	[6.9-8.6]; 142.49	4	122.16	[4.0-4.5]; 123.0	_	141.51	10.5	21.05	False	Unfolded	None	4.8	-0.123	7.9	-0.159	-0.154399	0.036	_	-0.159259	-0.146098
P35974	Phosphoprotein (Protein P)	psother402	304	507	204	_	Measles virus	_	32835749;32270045	417	439	23	6.3	83.09	[5.5-7.0]; 82.69	9	70.15	[8.9-9.0]; 70.68	_	82.06	12.8	12.94	False	Non-confident transition	None	9	0.012	4	-0.049	-0.0345962	0.061	_	-0.0389332	0.0115792
P37840	Alpha-synuclein (Non-A beta component of AD amyloid) (Non-A4 component of amyloid precursor) (NACP)	psother595	1	140	140	_	Homo sapiens	Synapsin condensate	33774037	99	140	42	9	105.34	[7.4-9.0]; 102.58	4	25.39	[4.0-4.3]; 28.38	_	94.19	3.1	79.95	True	F->U	4.95	4	0.217	9	-0.261	-0.209635	0.478	_	-0.260582	0.217213
P38159	RNA-binding motif protein; X chromosome (Glycoprotein p43) (Heterogeneous nuclear ribonucleoprotein G) (hnRNP G) [Cleaved into: RNA-binding motif protein; X chromosome; N-terminally processed]	psother211	1	391	391	_	Homo sapiens	_	31363225	49	391	343	8.3	121.24	[7.6-8.9]; 120.53	4	100.35	[4.0-4.6]; 101.02	_	116.69	10.5	20.89	False	Unfolded	None	4.6	-0.004	8.3	-0.06	-0.0446317	0.056	_	-0.060478	-0.0138569
P38713	Oxysterol-binding protein homolog 3	psself193	588	996	409	_	Saccharomyces cerevisiae	Stress granule	32169085	588	610	23	4	220.87	[4.0-5.5]; 219.1	9	157.13	[8.7-9.0]; 160.28	_	190.17	13.8	63.74	False	Unfolded	None	9	-0.445	4	-0.841	-0.58236	0.396	_	-0.841006	-0.444837
P38713	Oxysterol-binding protein homolog 3	psself193	588	996	409	_	Saccharomyces cerevisiae	Stress granule	32169085	908	929	22	8.1	90.45	[7.0-8.9]; 89.3	4	54.7	[4.0-4.3]; 55.98	_	87.27	7	35.75	False	Folded	None	4.8	0.163	8.1	0.088	0.0995336	0.075	_	0.0878085	0.135292
P38760	RNA-binding protein MIP6 (MEX67-interacting protein 6)	psother54	1	659	659	_	Saccharomyces cerevisiae	P-body	27320918;29424691	1	31	31	5.3	79.85	[4.0-6.1]; 79.17	9	58.95	[8.8-9.0]; 59.82	_	72.78	10.3	20.9	False	Non-confident transition	None	9	0.113	4	-0.008	0.0529849	0.121	_	0.000944225	0.113476
P38911	FK506-binding nuclear protein (EC 5.2.1.8) (FKBP-70) (Nucleolar proline isomerase) (Peptidyl-prolyl cis-trans isomerase) (PPIase) (Proline rotamase)	psother164	1	411	411	_	Saccharomyces cerevisiae	Nucleolus	30963611;26359986	9	32	24	8.9	-12.28	[7.7-9.0]; -13.0	4	-35.11	[4.0-4.4]; -34.09	_	-17.05	3.9	22.83	False	Folded	None	4	0.524	8.8	0.404	0.420902	0.12	_	0.404492	0.524295
P38911	FK506-binding nuclear protein (EC 5.2.1.8) (FKBP-70) (Nucleolar proline isomerase) (Peptidyl-prolyl cis-trans isomerase) (PPIase) (Proline rotamase)	psother164	1	411	411	_	Saccharomyces cerevisiae	Nucleolus	30963611;26359986	34	57	24	6.9	63.86	[6.2-7.8]; 63.01	4	40.41	[4.0-4.3]; 41.4	_	63.83	7	23.45	False	Folded	None	9	0.192	4	0.15	0.153288	0.042	_	0.153117	0.150487
P38911	FK506-binding nuclear protein (EC 5.2.1.8) (FKBP-70) (Nucleolar proline isomerase) (Peptidyl-prolyl cis-trans isomerase) (PPIase) (Proline rotamase)	psother164	1	411	411	_	Saccharomyces cerevisiae	Nucleolus	30963611;26359986	63	153	91	8.7	148.95	[7.0-9.0]; 146.4	4	58.26	[4.0-4.3]; 62.67	_	140.22	3.5	90.69	True	F->U	4.25	4	0.075	8.6	-0.422	-0.396113	0.497	_	-0.421589	0.074563
P38911	FK506-binding nuclear protein (EC 5.2.1.8) (FKBP-70) (Nucleolar proline isomerase) (Peptidyl-prolyl cis-trans isomerase) (PPIase) (Proline rotamase)	psother164	1	411	411	_	Saccharomyces cerevisiae	Nucleolus	30963611;26359986	158	270	113	8.3	198.27	[6.7-9.0]; 195.89	4	92.57	[4.0-4.2]; 96.38	_	192.48	3.7	105.7	True	F->U	4.05	4	0.024	8.4	-0.612	-0.583533	0.636	_	-0.612124	0.0236159
P38911	FK506-binding nuclear protein (EC 5.2.1.8) (FKBP-70) (Nucleolar proline isomerase) (Peptidyl-prolyl cis-trans isomerase) (PPIase) (Proline rotamase)	psother164	1	411	411	_	Saccharomyces cerevisiae	Nucleolus	30963611;26359986	278	329	52	6.1	124.52	[5.4-6.8]; 123.32	9	91.28	[8.9-9.0]; 92.24	_	119.66	9.8	33.24	False	Non-confident transition	None	9	0.013	4	-0.163	-0.102963	0.176	_	-0.130826	0.0127428
P39447	Tight junction protein ZO-1 (Tight junction protein 1) (Zona occludens protein 1) (Zonula occludens protein 1)	psother410	1	1745	1745	_	Mus musculus	_	32891490;31675500	35	81	47	8.6	56.23	[7.3-9.0]; 55.4	4	28.23	[4.0-4.4]; 29.35	_	52.26	4.3	28	False	Folded	None	4.3	0.303	8.6	0.15	0.164912	0.153	_	0.149937	0.29469
P39447	Tight junction protein ZO-1 (Tight junction protein 1) (Zona occludens protein 1) (Zonula occludens protein 1)	psother410	1	1745	1745	_	Mus musculus	_	32891490;31675500	100	194	95	6.7	134.48	[6.0-7.5]; 133.98	4	119.1	[4.0-4.3]; 119.81	_	134.29	10.9	15.38	False	Unfolded	None	9	-0.145	4	-0.184	-0.183208	0.039	_	-0.18336	-0.183928
P39447	Tight junction protein ZO-1 (Tight junction protein 1) (Zona occludens protein 1) (Zonula occludens protein 1)	psother410	1	1745	1745	_	Mus musculus	_	32891490;31675500	214	416	203	8.2	104.31	[7.0-9.0]; 103.41	4.1	75.88	[4.0-4.8]; 76.62	_	101.6	5	28.43	False	Folded	None	4.9	0.125	8.2	0.005	0.0162746	0.12	_	0.00527373	0.103101
P39447	Tight junction protein ZO-1 (Tight junction protein 1) (Zona occludens protein 1) (Zonula occludens protein 1)	psother410	1	1745	1745	_	Mus musculus	_	32891490;31675500	826	1063	238	8.2	79.89	[6.8-9.0]; 79.06	4.5	48.78	[4.0-4.7]; 49.49	_	77.72	4.6	31.11	False	Folded	None	4.5	0.233	8.3	0.075	0.0856994	0.158	_	0.0750017	0.233131
P39447	Tight junction protein ZO-1 (Tight junction protein 1) (Zona occludens protein 1) (Zonula occludens protein 1)	psother410	1	1745	1745	_	Mus musculus	_	32891490;31675500	1091	1134	44	8.5	111.3	[7.3-9.0]; 110.04	4	63.03	[4.0-4.4]; 64.84	_	104.99	4.6	48.27	True	F->U	5.85	4.6	0.127	8.5	-0.103	-0.0737762	0.23	_	-0.10253	0.0902203
P39447	Tight junction protein ZO-1 (Tight junction protein 1) (Zona occludens protein 1) (Zonula occludens protein 1)	psother410	1	1745	1745	_	Mus musculus	_	32891490;31675500	1136	1361	226	6.9	68.84	[6.5-7.5]; 68.5	4.3	58.85	[4.0-4.7]; 59.04	_	68.81	7	9.99	False	Folded	None	9	0.187	4	0.145	0.157285	0.042	_	0.157489	0.159727
P39447	Tight junction protein ZO-1 (Tight junction protein 1) (Zona occludens protein 1) (Zonula occludens protein 1)	psother410	1	1745	1745	_	Mus musculus	_	32891490;31675500	1364	1529	166	5.8	55.44	[5.2-6.5]; 55.01	9	43.41	[8.9-9.0]; 43.78	_	52.72	9.4	12.03	False	Folded	None	9	0.236	4	0.153	0.198996	0.083	_	0.1757	0.235697
P39447	Tight junction protein ZO-1 (Tight junction protein 1) (Zona occludens protein 1) (Zonula occludens protein 1)	psother410	1	1745	1745	_	Mus musculus	_	32891490;31675500	1531	1607	77	5.8	67.64	[5.1-6.5]; 66.89	9	46.38	[8.8-9.0]; 47.4	_	62.99	9.4	21.26	False	Folded	None	9	0.222	4	0.075	0.156486	0.147	_	0.115007	0.221628
P39447	Tight junction protein ZO-1 (Tight junction protein 1) (Zona occludens protein 1) (Zonula occludens protein 1)	psother410	1	1745	1745	_	Mus musculus	_	32891490;31675500	1609	1633	25	9	95.49	[7.6-9.0]; 92.88	4	29.76	[4.0-4.3]; 32.2	_	83.78	3.6	65.73	True	F->U	5.35	4	0.228	9	-0.174	-0.132033	0.402	_	-0.173884	0.228216
P39517	ATP-dependent RNA helicase DHH1 (EC 3.6.4.13) (DExD/H-box helicase 1)	psother236	1	506	506	pH 7.4	Saccharomyces cerevisiae	P-body	31435012	19	42	24	8.3	99.95	[7.2-9.0]; 98.68	4	61.65	[4.0-4.3]; 63.45	10% maximum solubility	95.45	7	38.3	False	Folded	None	4.5	0.128	8.3	0.036	0.0530322	0.092	Folded	0.0362415	0.114787
P39517	ATP-dependent RNA helicase DHH1 (EC 3.6.4.13) (DExD/H-box helicase 1)	psother236	1	506	506	pH 7.4	Saccharomyces cerevisiae	P-body	31435012	439	506	68	4.8	9.65	[4.0-5.3]; 9.59	9	5.69	[6.9-9.0]; 5.78	10% minimum solubility	5.99	7	3.96	False	Folded	None	6.5	0.388	4	0.329	0.381566	0.059	Folded	0.336817	0.378352
P39769	Polyhomeotic-proximal chromatin protein	psother454	1289	1577	289	_	Drosophila melanogaster	_	33154383	1325	1353	29	6.7	125.23	[6.0-7.5]; 124.38	4	99.86	[4.0-4.2]; 100.82	_	124.82	9.2	25.37	False	Unfolded	None	9	-0.017	6.7	-0.079	-0.0774263	0.062	_	-0.0789779	-0.0655954
P39769	Polyhomeotic-proximal chromatin protein	psother454	1289	1577	289	_	Drosophila melanogaster	_	33154383	1423	1447	25	7.2	60.17	[6.4-8.5]; 58.7	4	17.8	[4.0-4.3]; 19.74	_	60	3.7	42.37	False	Folded	None	4	0.333	7.2	0.05	0.0502423	0.283	_	0.0495646	0.33264
P40070	U6 snRNA-associated Sm-like protein LSm4	psother33	1	187	187	pH 7.4	Saccharomyces cerevisiae	P-body	26238190	89	187	99	5.1	111.46	[4.0-6.0]; 111.18	9	100.4	[8.9-9.0]; 100.74	Middle	107.68	11.8	11.06	False	Unfolded	None	9	-0.036	4	-0.104	-0.0640448	0.068	Unfolded	-0.0971541	-0.0362689
P40381	Chromatin-associated protein swi6	psother270	1	328	328	_	Schizosaccharomyces pombe	_	31543422	1	90	90	7	155.12	[6.3-7.9]; 153.94	4	118.16	[4.0-4.4]; 119.47	_	155.12	4.8	36.96	False	Unfolded	None	4.8	-0.046	7.1	-0.219	-0.218895	0.173	_	-0.218895	-0.0993492
P40381	Chromatin-associated protein swi6	psother270	1	328	328	_	Schizosaccharomyces pombe	_	31543422	99	121	23	9	88.61	[7.8-9.0]; 85.59	4	11.81	[4.0-4.4]; 15.49	_	72.25	3.3	76.8	True	F->U	5.55	4	0.245	9	-0.174	-0.111721	0.419	_	-0.173638	0.245286
P40381	Chromatin-associated protein swi6	psother270	1	328	328	_	Schizosaccharomyces pombe	_	31543422	126	265	140	6.7	120.08	[6.1-7.3]; 119.28	4	98.87	[4.0-4.5]; 99.67	_	119.49	5.2	21.21	False	Non-confident transition	None	9	0.01	6.8	-0.053	-0.0516722	0.063	_	-0.0529998	-0.0405374
P40541	Cohesin subunit SCC3 (Irregular cell behavior protein 1)	psother533	1	1150	1150	_	Saccharomyces cerevisiae	_	33568486	1	121	121	7.2	155.52	[6.4-8.2]; 154.65	4	127.83	[4.0-4.4]; 128.89	_	155.41	6.1	27.69	False	Unfolded	None	4.9	-0.103	7.3	-0.184	-0.1826	0.081	_	-0.183831	-0.139859
P40541	Cohesin subunit SCC3 (Irregular cell behavior protein 1)	psother533	1	1150	1150	_	Saccharomyces cerevisiae	_	33568486	1065	1150	86	8.3	108.85	[6.8-9.0]; 107.72	4	58.19	[4.0-4.2]; 59.96	_	105.76	3.9	50.66	True	F->U	5.35	4	0.19	8.4	-0.122	-0.10714	0.312	_	-0.122202	0.190295
P42168	Casein kinase I isoform alpha (CKI-alpha) (EC 2.7.11.1) (CK1)	psother575	1	341	341	_	Caenorhabditis elegans	_	33748125;31050339	306	341	36	9	16.16	[4.0-4.0]; 16.16	9	16.16	[4.0-4.0]; 16.16	_	16.16	7	0	False	Folded	None	4	0.361	4	0.361	0.360969	0	_	0.360969	0.360969
P42763	Dehydrin ERD14	psother501	1	185	185	_	Arabidopsis thaliana	_	33469149	1	185	185	6.5	120.3	[6.0-7.1]; 119.25	9	92.51	[8.9-9.0]; 93.26	_	118.41	5.2	27.79	Possible Multitransition	Variable	[4.349999999999999; 5.5499999999999945; 8.149999999999984]	9	0.043	6.7	-0.048	-0.043946	0.091	_	-0.046896	0.0433097
P42768	Wiskott-Aldrich syndrome protein (WASp)	psother185	39	502	464	_	Homo sapiens	Receptor cluster	31268421	139	199	61	7.3	58.44	[6.3-8.1]; 58.11	4	48.17	[4.0-4.3]; 48.58	_	58.4	11.8	10.27	False	Folded	None	9	0.164	4	0.139	0.146614	0.025	_	0.146535	0.139174
P42768	Wiskott-Aldrich syndrome protein (WASp)	psother185	39	502	464	_	Homo sapiens	Receptor cluster	31268421	206	502	297	8.1	39.88	[7.2-8.8]; 39.45	4.4	26.24	[4.0-4.9]; 26.55	_	38.14	6.1	13.64	False	Folded	None	4.9	0.303	8	0.266	0.270063	0.037	_	0.265674	0.298535
P42858	Huntingtin (Huntington disease protein) (HD protein) [Cleaved into: Huntingtin; myristoylated N-terminal fragment]	psother263	1	3142	3142	_	Homo sapiens	Htt inclusion	31527136	1	96	96	5.9	23.9	[5.1-6.6]; 23.42	9	9.49	[8.8-9.0]; 10.15	_	21.21	9.6	14.41	False	Folded	None	9	0.367	4	0.298	0.330802	0.069	_	0.318481	0.367407
P42858	Huntingtin (Huntington disease protein) (HD protein) [Cleaved into: Huntingtin; myristoylated N-terminal fragment]	psother263	1	3142	3142	_	Homo sapiens	Htt inclusion	31527136	442	470	29	8.9	120.84	[7.4-9.0]; 118.8	4	55.05	[4.0-4.3]; 57.47	_	111.17	3.5	65.79	True	F->U	4.75	4	0.137	8.9	-0.237	-0.202869	0.374	_	-0.237438	0.137389
P42858	Huntingtin (Huntington disease protein) (HD protein) [Cleaved into: Huntingtin; myristoylated N-terminal fragment]	psother263	1	3142	3142	_	Homo sapiens	Htt inclusion	31527136	472	622	151	9	101.93	[8.0-9.0]; 99.14	4	36.37	[4.0-4.3]; 39.11	_	85.35	3.3	65.56	True	F->U	6.25	4	0.218	9	-0.107	-0.0432393	0.325	_	-0.106624	0.218436
P42858	Huntingtin (Huntington disease protein) (HD protein) [Cleaved into: Huntingtin; myristoylated N-terminal fragment]	psother263	1	3142	3142	_	Homo sapiens	Htt inclusion	31527136	641	671	31	8.3	106.69	[7.0-9.0]; 105.28	4	55.68	[4.0-4.3]; 57.76	_	102.11	4.2	51.01	True	F->U	5.75	4.1	0.2	8.3	-0.068	-0.052531	0.268	_	-0.067791	0.191739
P42858	Huntingtin (Huntington disease protein) (HD protein) [Cleaved into: Huntingtin; myristoylated N-terminal fragment]	psother263	1	3142	3142	_	Homo sapiens	Htt inclusion	31527136	1176	1220	45	6.3	99.14	[5.6-6.9]; 98.46	9	78.36	[8.9-9.0]; 79.01	_	96.99	10.2	20.78	True	U->F	7.45	9	0.066	4	-0.038	-0.0109316	0.104	_	-0.0209787	0.0662086
P42858	Huntingtin (Huntington disease protein) (HD protein) [Cleaved into: Huntingtin; myristoylated N-terminal fragment]	psother263	1	3142	3142	_	Homo sapiens	Htt inclusion	31527136	2330	2351	22	7.8	150.9	[6.6-9.0]; 149.12	4	90.68	[4.0-4.3]; 92.96	_	148.71	3.9	60.22	True	F->U	4.45	4	0.079	7.8	-0.316	-0.306708	0.395	_	-0.315656	0.0787922
P42858	Huntingtin (Huntington disease protein) (HD protein) [Cleaved into: Huntingtin; myristoylated N-terminal fragment]	psother263	1	3142	3142	_	Homo sapiens	Htt inclusion	31527136	2633	2663	31	8.3	145.54	[6.8-9.0]; 143.95	4	73.64	[4.0-4.3]; 76.56	_	141.03	3.8	71.9	True	F->U	4.55	4	0.137	8.4	-0.356	-0.332578	0.493	_	-0.356305	0.136777
P43243	Matrin-3	psother170	1	397	397	_	Homo sapiens	_	31019288	84	106	23	8.7	62.25	[8.0-9.0]; 61.65	4	39.58	[4.0-4.4]; 40.57	_	54.77	10.5	22.67	False	Folded	None	6.5	0.195	8.7	0.168	0.191777	0.027	_	0.167584	0.185711
P43243	Matrin-3	psother170	1	397	397	_	Homo sapiens	_	31019288	136	179	44	8.2	111.33	[7.1-8.9]; 110.15	4	75.53	[4.0-4.4]; 76.95	_	107.47	9.6	35.8	True	F->U	6.15	4.9	0.035	8	-0.036	-0.0252328	0.071	_	-0.0360035	0.00100341
P43243	Matrin-3	psother170	1	397	397	_	Homo sapiens	_	31019288	246	274	29	7	96.88	[6.3-7.9]; 96.03	4	71.36	[4.0-4.3]; 72.32	_	96.88	9.6	25.52	False	Folded	None	9	0.077	4	0.031	0.0316112	0.046	_	0.0316112	0.0305697
P43243	Matrin-3	psother170	1	397	397	_	Homo sapiens	_	31019288	330	398	69	8.4	40.62	[7.6-8.9]; 40.34	4	32.86	[4.0-4.3]; 33.22	_	38.94	10.5	7.76	False	Folded	None	9	0.292	4	0.246	0.287693	0.046	_	0.287845	0.246187
P45973	Chromobox protein homolog 5 (Antigen p25) (Heterochromatin protein 1 homolog alpha) (HP1 alpha)	psother300	1	191	191	pH 7.2	Homo sapiens	Heterochromatin	31952807	73	110	38	6.1	187.25	[5.4-6.8]; 185.77	9	144.07	[8.9-9.0]; 145.27	Middle	181.28	10.1	43.18	False	Unfolded	None	9	-0.216	4	-0.41	-0.35387	0.194	Unfolded	-0.377991	-0.21591
P46672	tRNA-aminoacylation cofactor ARC1 (Acyl-RNA-complex protein 1) (GU4 nucleic-binding protein 1) (G4p1 protein) (P42) (tRNA-interacting factor ARC1)	psother166	1	376	376	_	Saccharomyces cerevisiae	Stress granule	30963611;26359986	128	208	81	5.9	144.57	[5.0-6.6]; 142.77	9	94.65	[8.8-9.0]; 97.01	_	134.79	9.8	49.92	False	Unfolded	None	9	-0.032	4	-0.258	-0.181634	0.226	_	-0.222588	-0.0320937
P46777	60S ribosomal protein L5 (Large ribosomal subunit protein uL18)	psother42	21	45	25	_	Homo sapiens	Nucleolus	26836305	21	46	26	6.1	167.21	[5.3-6.9]; 166.18	9	137.23	[8.9-9.0]; 138.43	_	163.79	11.4	29.98	False	Unfolded	None	9	-0.344	4	-0.461	-0.444361	0.117	_	-0.457101	-0.344339
P46804	Spidroin-2 (Dragline silk fibroin 2) (Fragment)	psself225	1	627	627	_	Nephila clavipes	_	32601486	1	502	502	7.7	14.78	[7.1-8.0]; 14.77	5.2	14.59	[4.8-5.3]; 14.59	_	14.76	8.8	0.19	False	Folded	None	5	0.358	7.5	0.357	0.356965	0.001	_	0.356927	0.357598
P46937	Transcriptional coactivator YAP1 (Yes-associated protein 1) (Protein yorkie homolog) (Yes-associated protein YAP65 homolog)	psself176	1	454	454	_	Homo sapiens	_	31792379	1	179	179	8.2	28.7	[7.3-8.8]; 28.49	4	23.03	[4.0-4.5]; 23.18	_	27.71	7	5.67	False	Folded	None	6.3	0.313	4	0.289	0.302914	0.024	_	0.298124	0.288949
P46937	Transcriptional coactivator YAP1 (Yes-associated protein 1) (Protein yorkie homolog) (Yes-associated protein YAP65 homolog)	psself176	1	454	454	_	Homo sapiens	_	31792379	199	241	43	8.5	29.09	[7.3-9.0]; 28.62	4	12.79	[4.0-4.3]; 13.35	_	26.84	4.3	16.3	False	Folded	None	4.2	0.367	8.5	0.303	0.309059	0.064	_	0.303465	0.364447
P46937	Transcriptional coactivator YAP1 (Yes-associated protein 1) (Protein yorkie homolog) (Yes-associated protein YAP65 homolog)	psself176	1	454	454	_	Homo sapiens	_	31792379	258	453	196	8.4	68.8	[7.4-9.0]; 68.19	4.1	46.52	[4.0-4.8]; 47.11	_	65.41	4.8	22.28	False	Folded	None	4.7	0.235	8.4	0.148	0.160038	0.087	_	0.147585	0.223335
P46937	Transcriptional coactivator YAP1 (Yes-associated protein 1) (Protein yorkie homolog) (Yes-associated protein YAP65 homolog)	psself334	266	504	239	_	Homo sapiens	Transcriptional condensate	33606996	266	479	214	8.5	72.95	[7.2-9.0]; 72.16	4.2	42.88	[4.0-4.4]; 43.32	_	69.44	4.3	30.07	False	Folded	None	4.3	0.255	8.5	0.119	0.132376	0.136	_	0.118549	0.253441
P47037	Structural maintenance of chromosomes protein 3 (DA-box protein SMC3)	psother534	1	1230	1230	_	Saccharomyces cerevisiae	_	33568486	1078	1098	21	9	179.32	[8.0-9.0]; 175.2	4	77.11	[4.0-4.4]; 81.84	_	153.82	3.5	102.21	False	Non-confident transition	None	4	0.004	9	-0.563	-0.47063	0.567	_	-0.563275	0.00373505
P48431	Transcription factor SOX-2	psself331	1	317	317	pH 7.5	Homo sapiens	_	33597515	1	79	79	6.1	82.47	[5.3-6.8]; 81.86	9	65.2	[8.9-9.0]; 65.75	Middle	80.21	10.7	17.27	False	Folded	None	9	0.112	4	0.017	0.0561716	0.095	Folded	0.0430199	0.11196
P48431	Transcription factor SOX-2	psself331	1	317	317	pH 7.5	Homo sapiens	_	33597515	101	128	28	5.4	145.77	[4.1-6.3]; 143.43	9	87.53	[8.8-9.0]; 90.16	Middle	129.21	10.4	58.24	False	Unfolded	None	9	-0.139	4	-0.443	-0.30113	0.304	Unfolded	-0.412951	-0.138863
P48431	Transcription factor SOX-2	psself331	1	317	317	pH 7.5	Homo sapiens	_	33597515	246	267	22	6.9	63.99	[5.9-8.2]; 63.88	4	60.01	[4.0-4.2]; 60.14	10% maximum solubility	63.98	7.4	3.98	False	Folded	None	9	0.174	4	0.112	0.163397	0.062	Folded	0.16247	0.111767
P48431	Transcription factor SOX-2	psself331	1	317	317	pH 7.5	Homo sapiens	_	33597515	276	315	40	7.7	9.74	[6.5-8.6]; 9.61	4	4.95	[4.0-4.3]; 5.15	10% maximum solubility	9.65	6.6	4.79	False	Folded	None	6	0.346	4	0.305	0.325752	0.041	Folded	0.322546	0.30538
P48837	Nucleoporin NUP57 (Nuclear pore protein NUP57)	psother70	1	233	233	_	Saccharomyces cerevisiae	Nuclear pore complex	28343140;17082456	5	234	230	4.2	30.74	[4.0-5.9]; 30.55	9	23.17	[8.7-9.0]; 23.54	_	27.98	12.2	7.57	False	Folded	None	9	0.313	4	0.285	0.295048	0.028	_	0.285124	0.312755
P49687	Nucleoporin NUP145 (EC 3.4.21.-) (Nuclear pore protein NUP145) [Cleaved into: Nucleoporin NUP145N (N-NUP145); Nucleoporin NUP145C (C-NUP145)]	psother71	1	219	219	_	Saccharomyces cerevisiae	Nuclear pore complex	28343140;17082456	7	127	121	4	25.65	[4.0-5.9]; 25.46	9	18.49	[8.7-9.0]; 18.83	_	23.02	12.2	7.16	False	Folded	None	9	0.321	4	0.292	0.302753	0.029	_	0.292225	0.321406
P49687	Nucleoporin NUP145 (EC 3.4.21.-) (Nuclear pore protein NUP145) [Cleaved into: Nucleoporin NUP145N (N-NUP145); Nucleoporin NUP145C (C-NUP145)]	psother71	1	219	219	_	Saccharomyces cerevisiae	Nuclear pore complex	28343140;17082456	132	220	89	5.5	24.72	[4.0-6.4]; 24.57	9	18.95	[8.8-9.0]; 19.21	_	23.35	11.4	5.77	False	Folded	None	9	0.325	4	0.295	0.306788	0.03	_	0.300041	0.325384
P49790	Nuclear pore complex protein Nup153 (153 kDa nucleoporin) (Nucleoporin Nup153)	psself2	875	1475	601	_	Homo sapiens	Nuclear pore complex	21961597;29424690	1064	1086	23	6	72.55	[5.2-6.7]; 71.22	9	34.81	[8.8-9.0]; 36.45	_	66	8.8	37.74	False	Folded	None	9	0.236	4	0.063	0.12198	0.173	_	0.0981767	0.235504
P49790	Nuclear pore complex protein Nup153 (153 kDa nucleoporin) (Nucleoporin Nup153)	psself2	875	1475	601	_	Homo sapiens	Nuclear pore complex	21961597;29424690	1144	1176	33	6.2	60.7	[5.5-6.8]; 59.9	9	37.25	[8.8-9.0]; 38.32	_	57.55	7	23.45	False	Folded	None	9	0.268	4	0.153	0.194611	0.115	_	0.18202	0.267977
P49790	Nuclear pore complex protein Nup153 (153 kDa nucleoporin) (Nucleoporin Nup153)	psself2	875	1475	601	_	Homo sapiens	Nuclear pore complex	21961597;29424690	1313	1396	84	9	-2.9	[4.0-4.0]; -2.9	9	-2.9	[4.0-4.0]; -2.9	_	-2.9	7	0	False	Folded	None	4	0.423	4	0.423	0.423163	0	_	0.423163	0.423163
P49790	Nuclear pore complex protein Nup153 (153 kDa nucleoporin) (Nucleoporin Nup153)	psself2	875	1475	601	_	Homo sapiens	Nuclear pore complex	21961597;29424690	1415	1444	30	9	-14.28	[4.0-4.0]; -14.28	9	-14.28	[4.0-4.0]; -14.28	_	-14.28	7	0	False	Folded	None	4	0.455	4	0.455	0.454526	0	_	0.454526	0.454526
P49880	Ecdysone receptor (20-hydroxy-ecdysone receptor) (20E receptor) (EcRH) (AaEcR) (Ecdysteroid receptor) (Nuclear receptor subfamily 1 group H member 1)	psself355	1	776	776	_	Aedes aegypti	_	33807814	23	49	27	5	18.72	[4.0-7.7]; 18.7	9	17.27	[9.0-9.0]; 17.27	_	18.69	14.5	1.45	False	Folded	None	9	0.314	4	0.309	0.308763	0.005	_	0.308675	0.313978
P49880	Ecdysone receptor (20-hydroxy-ecdysone receptor) (20E receptor) (EcRH) (AaEcR) (Ecdysteroid receptor) (Nuclear receptor subfamily 1 group H member 1)	psself355	1	776	776	_	Aedes aegypti	_	33807814	86	108	23	4	48.36	[4.0-5.6]; 47.62	9	21.29	[8.7-9.0]; 22.35	_	35.95	12.2	27.07	False	Folded	None	9	0.252	4	0.101	0.186155	0.151	_	0.100546	0.251863
P49880	Ecdysone receptor (20-hydroxy-ecdysone receptor) (20E receptor) (EcRH) (AaEcR) (Ecdysteroid receptor) (Nuclear receptor subfamily 1 group H member 1)	psself355	1	776	776	_	Aedes aegypti	_	33807814	132	153	22	9	16.16	[8.0-9.0]; 15.03	4	-9.89	[4.0-4.4]; -8.8	_	9.63	1.8	26.05	False	Folded	None	4	0.403	9	0.266	0.290134	0.137	_	0.266184	0.403036
P49880	Ecdysone receptor (20-hydroxy-ecdysone receptor) (20E receptor) (EcRH) (AaEcR) (Ecdysteroid receptor) (Nuclear receptor subfamily 1 group H member 1)	psself355	1	776	776	_	Aedes aegypti	_	33807814	160	238	79	7	24.5	[6.3-7.7]; 24.33	4	19.68	[4.0-4.5]; 19.87	_	24.5	7	4.82	False	Folded	None	9	0.321	4	0.309	0.310112	0.012	_	0.310112	0.308689
P49880	Ecdysone receptor (20-hydroxy-ecdysone receptor) (20E receptor) (EcRH) (AaEcR) (Ecdysteroid receptor) (Nuclear receptor subfamily 1 group H member 1)	psself355	1	776	776	_	Aedes aegypti	_	33807814	240	283	44	6.5	85.71	[5.9-7.2]; 85.3	4	73.1	[4.0-4.2]; 73.62	_	85.08	9.2	12.61	False	Folded	None	9	0.102	6.8	0.074	0.0743117	0.028	_	0.07465	0.0909278
P49880	Ecdysone receptor (20-hydroxy-ecdysone receptor) (20E receptor) (EcRH) (AaEcR) (Ecdysteroid receptor) (Nuclear receptor subfamily 1 group H member 1)	psself355	1	776	776	_	Aedes aegypti	_	33807814	675	776	102	4.1	90.93	[4.0-5.1]; 90.74	7.3	81.27	[6.7-9.0]; 81.53	_	81.34	7.4	9.66	False	Non-confident transition	None	6.9	0.099	4	-0.001	0.0974232	0.1	_	-0.000666392	0.0947533
P50995	Annexin A11 (56 kDa autoantigen) (Annexin XI) (Annexin-11) (Calcyclin-associated annexin 50) (CAP-50)	psself259	1	505	505	_	Homo sapiens	Stress granule	33087501	8	35	28	9	-56.32	[4.0-4.0]; -56.32	9	-56.32	[4.0-4.0]; -56.32	_	-56.32	7	0	False	Folded	None	4	0.622	4	0.622	0.621585	0	_	0.621585	0.621585
P50995	Annexin A11 (56 kDa autoantigen) (Annexin XI) (Annexin-11) (Calcyclin-associated annexin 50) (CAP-50)	psself259	1	505	505	_	Homo sapiens	Stress granule	33087501	65	206	142	8.8	-24.78	[8.0-9.0]; -24.94	4	-30.97	[4.0-4.6]; -30.75	_	-26.75	7	6.19	False	Folded	None	4.6	0.521	8.7	0.506	0.511304	0.015	_	0.505649	0.519041
P51114	Fragile X mental retardation syndrome-related protein 1 (hFXR1p)	psother340	1	621	621	_	Homo sapiens	Stress granule	32302565;32302570	377	621	245	8.1	129.6	[7.2-8.8]; 128.89	4.1	108.14	[4.0-4.8]; 108.72	_	126.96	7	21.46	False	Unfolded	None	4.9	-0.01	8.1	-0.065	-0.0549913	0.055	_	-0.0654957	-0.0316635
P51608	Methyl-CpG-binding protein 2 (MeCp-2 protein) (MeCp2)	psother317	73	312	240	_	Homo sapiens	_	32111972	73	113	41	6.7	102.7	[6.0-7.5]; 102.15	4	87.65	[4.0-4.2]; 88.17	_	102.46	11.4	15.05	False	Unfolded	None	9	-0.027	7.1	-0.063	-0.0633703	0.036	_	-0.0621585	-0.0453313
P51608	Methyl-CpG-binding protein 2 (MeCp-2 protein) (MeCp2)	psother317	73	312	240	_	Homo sapiens	_	32111972	152	215	64	5.9	111.88	[4.9-6.7]; 110.79	9	82.15	[8.9-9.0]; 83.06	_	106.83	12.2	29.73	False	Unfolded	None	9	-0.051	4	-0.207	-0.158846	0.156	_	-0.185997	-0.0514927
P51608	Methyl-CpG-binding protein 2 (MeCp-2 protein) (MeCp2)	psother317	167	486	320	_	Homo sapiens	_	32111972	167	486	320	5.8	114.14	[4.8-6.6]; 112.92	9	82.74	[8.9-9.0]; 83.57	_	107.84	10.3	31.4	True	U->F	7.85	9	0.061	4	-0.102	-0.0337363	0.163	_	-0.0666827	0.0611796
P51608	Methyl-CpG-binding protein 2 (MeCp-2 protein) (MeCp2)	psother317	73	312	240	_	Homo sapiens	_	32111972	218	313	96	5.6	101.37	[4.0-6.5]; 99.73	9	60.49	[8.8-9.0]; 62.46	_	92.35	11.8	40.88	True	U->F	8.35	9	0.044	4	-0.127	-0.0731684	0.171	_	-0.106813	0.0443442
P51991	Heterogeneous nuclear ribonucleoprotein A3 (hnRNP A3)	psself105	1	378	378	_	Homo sapiens	_	29961577	1	38	38	6.9	147.95	[6.2-7.7]; 147.21	4	124.49	[4.0-4.3]; 125.51	_	147.92	11.8	23.46	False	Unfolded	None	9	-0.213	4	-0.282	-0.262682	0.069	_	-0.262788	-0.282127
P51991	Heterogeneous nuclear ribonucleoprotein A3 (hnRNP A3)	psself105	1	378	378	_	Homo sapiens	_	29961577	199	226	28	5.5	109.53	[4.0-6.5]; 108.59	9	82.29	[8.9-9.0]; 83.01	_	103.54	12.8	27.24	False	Unfolded	None	9	-0.072	4	-0.195	-0.156463	0.123	_	-0.181748	-0.0717175
P51991	Heterogeneous nuclear ribonucleoprotein A3 (hnRNP A3)	psself105	1	378	378	_	Homo sapiens	_	29961577	334	355	22	4	67.91	[4.0-5.9]; 67.57	9	53.11	[8.8-9.0]; 53.76	_	63.06	10.4	14.8	False	Folded	None	9	0.127	4	0.072	0.089367	0.055	_	0.0716512	0.127057
P52912	Nucleolysin TIA-1 (RNA-binding protein TIA-1) (T-cell-restricted intracellular antigen-1) (TIA-1)	psself242	1	386	386	_	Mus musculus	Stress granule	32824618;29298433	351	372	22	9	-28.58	[4.0-4.0]; -28.58	9	-28.58	[4.0-4.0]; -28.58	_	-28.58	7	0	False	Folded	None	4	0.51	4	0.51	0.51021	0	_	0.51021	0.51021
P52948	Nuclear pore complex protein Nup98-Nup96 (EC 3.4.21.-) [Cleaved into: Nuclear pore complex protein Nup98 (98 kDa nucleoporin) (Nucleoporin Nup98) (Nup98); Nuclear pore complex protein Nup96 (96 kDa nucleoporin) (Nucleoporin Nup96) (Nup96)]	psother592	1	1817	1817	_	Homo sapiens	Nuclear pore complex	33771451;33479542	157	177	21	5.7	12.98	[4.8-6.4]; 12.41	9	-3.72	[8.8-9.0]; -2.95	_	8.93	10	16.7	False	Folded	None	9	0.387	5.7	0.332	0.344489	0.055	_	0.332036	0.38749
P52948	Nuclear pore complex protein Nup98-Nup96 (EC 3.4.21.-) [Cleaved into: Nuclear pore complex protein Nup98 (98 kDa nucleoporin) (Nucleoporin Nup98) (Nup98); Nuclear pore complex protein Nup96 (96 kDa nucleoporin) (Nucleoporin Nup96) (Nup96)]	psother592	1	1817	1817	_	Homo sapiens	Nuclear pore complex	33771451;33479542	200	230	31	7.6	69.78	[6.6-8.8]; 69.01	4	45.74	[4.0-4.4]; 46.8	_	69.11	4.6	24.04	False	Folded	None	4.6	0.217	7.6	0.119	0.121469	0.098	_	0.119272	0.193079
P52948	Nuclear pore complex protein Nup98-Nup96 (EC 3.4.21.-) [Cleaved into: Nuclear pore complex protein Nup98 (98 kDa nucleoporin) (Nucleoporin Nup98) (Nup98); Nuclear pore complex protein Nup96 (96 kDa nucleoporin) (Nucleoporin Nup96) (Nup96)]	psother592	1	1817	1817	_	Homo sapiens	Nuclear pore complex	33771451;33479542	448	468	21	4	-22.26	[4.0-5.9]; -22.62	9	-35.94	[8.7-9.0]; -35.29	_	-27.31	12.2	13.68	False	Folded	None	9	0.509	4	0.457	0.47586	0.052	_	0.457415	0.508659
P52948	Nuclear pore complex protein Nup98-Nup96 (EC 3.4.21.-) [Cleaved into: Nuclear pore complex protein Nup98 (98 kDa nucleoporin) (Nucleoporin Nup98) (Nup98); Nuclear pore complex protein Nup96 (96 kDa nucleoporin) (Nucleoporin Nup96) (Nup96)]	psother592	1	1817	1817	_	Homo sapiens	Nuclear pore complex	33771451;33479542	481	502	22	9	10.43	[8.3-9.0]; 9.72	4	-6.1	[4.0-4.5]; -5.29	_	4.51	1.8	16.53	False	Folded	None	4	0.4	9	0.326	0.348103	0.074	_	0.326494	0.400213
P52948	Nuclear pore complex protein Nup98-Nup96 (EC 3.4.21.-) [Cleaved into: Nuclear pore complex protein Nup98 (98 kDa nucleoporin) (Nucleoporin Nup98) (Nup98); Nuclear pore complex protein Nup96 (96 kDa nucleoporin) (Nucleoporin Nup96) (Nup96)]	psother592	1	1817	1817	_	Homo sapiens	Nuclear pore complex	33771451;33479542	516	591	76	6.1	70.23	[5.5-6.8]; 69.74	9	55.54	[8.9-9.0]; 56.09	_	68.38	10.1	14.69	False	Folded	None	9	0.162	4	0.06	0.104029	0.102	_	0.0850143	0.162335
P52948	Nuclear pore complex protein Nup98-Nup96 (EC 3.4.21.-) [Cleaved into: Nuclear pore complex protein Nup98 (98 kDa nucleoporin) (Nucleoporin Nup98) (Nup98); Nuclear pore complex protein Nup96 (96 kDa nucleoporin) (Nucleoporin Nup96) (Nup96)]	psother592	1	1817	1817	_	Homo sapiens	Nuclear pore complex	33771451;33479542	608	686	79	8.6	83.35	[7.1-9.0]; 82.22	4	45.9	[4.0-4.3]; 47.32	_	79.13	4.2	37.45	False	Folded	None	4.1	0.253	8.6	0.02	0.0384042	0.233	_	0.0196846	0.249478
P52948	Nuclear pore complex protein Nup98-Nup96 (EC 3.4.21.-) [Cleaved into: Nuclear pore complex protein Nup98 (98 kDa nucleoporin) (Nucleoporin Nup98) (Nup98); Nuclear pore complex protein Nup96 (96 kDa nucleoporin) (Nucleoporin Nup96) (Nup96)]	psother592	1	1817	1817	_	Homo sapiens	Nuclear pore complex	33771451;33479542	701	728	28	9	165.69	[7.6-9.0]; 162.35	4	79.35	[4.0-4.4]; 83.47	_	150.39	3.7	86.34	True	F->U	4.25	4	0.067	9	-0.498	-0.435119	0.565	_	-0.497731	0.0669431
P52948	Nuclear pore complex protein Nup98-Nup96 (EC 3.4.21.-) [Cleaved into: Nuclear pore complex protein Nup98 (98 kDa nucleoporin) (Nucleoporin Nup98) (Nup98); Nuclear pore complex protein Nup96 (96 kDa nucleoporin) (Nucleoporin Nup96) (Nup96)]	psother592	1	1817	1817	_	Homo sapiens	Nuclear pore complex	33771451;33479542	884	948	65	7	76.15	[6.2-8.1]; 75.2	4	49.56	[4.0-4.4]; 50.62	_	76.15	4.3	26.59	False	Folded	None	4.3	0.233	6.9	0.103	0.102722	0.13	_	0.102722	0.213872
P52948	Nuclear pore complex protein Nup98-Nup96 (EC 3.4.21.-) [Cleaved into: Nuclear pore complex protein Nup98 (98 kDa nucleoporin) (Nucleoporin Nup98) (Nup98); Nuclear pore complex protein Nup96 (96 kDa nucleoporin) (Nucleoporin Nup96) (Nup96)]	psother592	1	1817	1817	_	Homo sapiens	Nuclear pore complex	33771451;33479542	954	982	29	9	81.44	[7.7-9.0]; 78.97	4	20.74	[4.0-4.4]; 23.59	_	70.42	3.3	60.7	True	F->U	5.95	4	0.259	9	-0.117	-0.0729619	0.376	_	-0.11677	0.259204
P53104	Serine/threonine-protein kinase ATG1 (EC 2.7.11.1) (Autophagy protein 3) (Autophagy-related protein 1) (Cytoplasm to vacuole targeting protein 10)	psother308	1	897	897	_	Saccharomyces cerevisiae	Pre-autophagosomal structure	32025038	365	388	24	9	72.62	[7.7-9.0]; 71.64	4	45.58	[4.0-4.3]; 46.58	_	67.28	4.3	27.04	False	Folded	None	4.1	0.226	8.9	0.065	0.0826951	0.161	_	0.0653476	0.22237
P53104	Serine/threonine-protein kinase ATG1 (EC 2.7.11.1) (Autophagy protein 3) (Autophagy-related protein 1) (Cytoplasm to vacuole targeting protein 10)	psother308	1	897	897	_	Saccharomyces cerevisiae	Pre-autophagosomal structure	32025038	397	419	23	5.4	123.91	[4.4-6.1]; 122.66	9	88.28	[8.8-9.0]; 89.61	_	111.1	9.8	35.63	True	U->F	8.55	9	0.023	4	-0.192	-0.0671569	0.215	_	-0.170819	0.0229981
P53104	Serine/threonine-protein kinase ATG1 (EC 2.7.11.1) (Autophagy protein 3) (Autophagy-related protein 1) (Cytoplasm to vacuole targeting protein 10)	psother308	1	897	897	_	Saccharomyces cerevisiae	Pre-autophagosomal structure	32025038	443	514	72	8.2	76.69	[7.2-8.9]; 76.17	4	61.4	[4.0-4.4]; 62.0	_	74.81	10.1	15.29	False	Folded	None	4.9	0.154	4	0.139	0.142197	0.015	_	0.138923	0.138523
P53155	Uncharacterized protein YGL082W	psother202	1	381	381	_	Saccharomyces cerevisiae	Hyperosmotic shock foci	31285266	261	378	118	6.7	109.67	[6.1-7.3]; 109.23	4	95.69	[4.0-4.4]; 96.26	_	109.35	8.8	13.98	False	Non-confident transition	None	9	0.047	4	-0.02	0.00360589	0.067	_	0.0015315	-0.0197045
P53297	PAB1-binding protein 1 (Poly(A)-binding protein-binding protein)	psother35	1	722	722	pH 7.5	Saccharomyces cerevisiae	Stress granule	26238190	1	43	43	6.7	101.57	[6.0-7.4]; 101.2	4	90.96	[4.0-4.2]; 91.3	10% maximum solubility	101.35	9.8	10.61	False	Non-confident transition	None	9	0.023	4	-0.008	-0.0057528	0.031	Unfolded	-0.00617571	-0.00821324
P53297	PAB1-binding protein 1 (Poly(A)-binding protein-binding protein)	psother35	1	722	722	pH 7.5	Saccharomyces cerevisiae	Stress granule	26238190	141	173	33	6.7	115.46	[6.1-7.3]; 114.66	4	92.25	[4.0-4.3]; 93.1	10% maximum solubility	114.96	7	23.21	Possible Multitransition	Variable	[4.549999999999998; 5.749999999999994; 7.749999999999987]	9	0.044	4	-0.037	-0.0156524	0.081	Variable	-0.0172905	-0.0367085
P53297	PAB1-binding protein 1 (Poly(A)-binding protein-binding protein)	psother35	1	722	722	pH 7.5	Saccharomyces cerevisiae	Stress granule	26238190	243	281	39	7.7	97.64	[6.6-8.8]; 96.63	4	63.9	[4.0-4.3]; 65.12	10% maximum solubility	96.72	4.8	33.74	False	Non-confident transition	None	4.9	0.125	7.4	-0.001	0.00164663	0.126	Unfolded	-0.000121295	0.0851058
P53297	PAB1-binding protein 1 (Poly(A)-binding protein-binding protein)	psother35	1	722	722	pH 7.5	Saccharomyces cerevisiae	Stress granule	26238190	302	389	88	5.7	92.56	[4.6-6.5]; 91.42	9	63.99	[8.8-9.0]; 65.26	Middle	85.8	10.1	28.57	True	U->F	5.65	9	0.119	4	-0.026	0.0380061	0.145	Folded	0.000900661	0.119045
P53297	PAB1-binding protein 1 (Poly(A)-binding protein-binding protein)	psother35	1	722	722	pH 7.5	Saccharomyces cerevisiae	Stress granule	26238190	401	487	87	5.2	101.31	[4.0-6.1]; 100.72	9	74.8	[8.8-9.0]; 76.03	Middle	93.19	12.7	26.51	False	Non-confident transition	None	9	0.018	4	-0.125	-0.0537842	0.143	Unfolded	-0.110206	0.0183761
P53297	PAB1-binding protein 1 (Poly(A)-binding protein-binding protein)	psother35	1	722	722	pH 7.5	Saccharomyces cerevisiae	Stress granule	26238190	549	577	29	8.8	55.33	[7.7-9.0]; 54.3	4	17.2	[4.0-4.4]; 18.95	Middle	47.66	4	38.13	False	Folded	None	4	0.344	8.8	0.143	0.170752	0.201	Folded	0.142953	0.343529
P53297	PAB1-binding protein 1 (Poly(A)-binding protein-binding protein)	psother35	1	722	722	pH 7.5	Saccharomyces cerevisiae	Stress granule	26238190	636	659	24	9	15.25	[6.7-9.0]; 14.98	4	1.04	[4.0-4.3]; 1.48	10% maximum solubility	14.56	4	14.21	False	Folded	None	4.2	0.41	9	0.282	0.288707	0.128	Folded	0.282495	0.402808
P53297	PAB1-binding protein 1 (Poly(A)-binding protein-binding protein)	psother35	1	722	722	pH 7.5	Saccharomyces cerevisiae	Stress granule	26238190	682	722	41	4	127.32	[4.0-5.2]; 126.29	9	95.84	[8.0-9.0]; 97.32	Middle	103.33	11.4	31.48	False	Non-confident transition	None	9	0.003	4	-0.317	-0.0438634	0.32	Unfolded	-0.317271	0.00268306
P53550	m7GpppN-mRNA hydrolase (EC 3.6.1.62) (Protein PSU1) (mRNA-decapping enzyme subunit 2)	psother18	553	741	189	_	Saccharomyces cerevisiae	P-body	24862735	553	694	142	7.2	109.4	[6.3-8.4]; 108.4	4	80.21	[4.0-4.5]; 80.84	_	109.28	4.5	29.19	True	F->U	5.75	4.5	0.107	7.3	-0.04	-0.0391778	0.147	_	-0.0400498	0.0812258
P53550	m7GpppN-mRNA hydrolase (EC 3.6.1.62) (Protein PSU1) (mRNA-decapping enzyme subunit 2)	psother369	1	504	504	_	Saccharomyces cerevisiae	_	32513655	284	346	63	6.6	65.31	[6.0-7.2]; 65.02	4	57.3	[4.0-4.3]; 57.6	_	64.91	5.7	8.01	False	Folded	None	5.3	0.16	7	0.122	0.121841	0.038	_	0.123747	0.139256
P53550	m7GpppN-mRNA hydrolase (EC 3.6.1.62) (Protein PSU1) (mRNA-decapping enzyme subunit 2)	psother369	1	504	504	_	Saccharomyces cerevisiae	_	32513655	372	413	42	4	-45.49	[4.0-5.1]; -45.6	9	-48.68	[7.2-9.0]; -48.61	_	-48.29	10.5	3.19	False	Folded	None	9	0.59	4	0.56	0.58679	0.03	_	0.559939	0.58974
P53550	m7GpppN-mRNA hydrolase (EC 3.6.1.62) (Protein PSU1) (mRNA-decapping enzyme subunit 2)	psother369	1	504	504	_	Saccharomyces cerevisiae	_	32513655	415	500	86	6	62.55	[5.4-6.7]; 62.12	9	50.35	[8.9-9.0]; 50.76	_	60.65	9.8	12.2	False	Folded	None	9	0.175	4	0.119	0.133279	0.056	_	0.121883	0.175038
P54254	Ataxin-1 (Spinocerebellar ataxia type 1 protein homolog)	psother494	1	791	791	_	Mus musculus	Nuclear body	33356851;32005838	1	41	41	6.6	105.65	[6.0-7.2]; 105.03	4	87.48	[4.0-9.0]; 88.46	_	104.87	7	18.17	True	U->F	4.35	9	0.085	4	-0.024	0.0233677	0.109	_	0.0172799	-0.0243885
P54254	Ataxin-1 (Spinocerebellar ataxia type 1 protein homolog)	psother494	1	791	791	_	Mus musculus	Nuclear body	33356851;32005838	43	118	76	5.2	30.34	[4.3-5.8]; 30.1	9	24.12	[8.8-9.0]; 24.4	_	26.98	10.5	6.22	False	Folded	None	9	0.286	4	0.212	0.270379	0.074	_	0.22273	0.285501
P54254	Ataxin-1 (Spinocerebellar ataxia type 1 protein homolog)	psother494	1	791	791	_	Mus musculus	Nuclear body	33356851;32005838	152	266	115	4	33.1	[4.0-5.5]; 32.87	9	23.14	[8.6-9.0]; 23.57	_	26.58	10.5	9.96	False	Folded	None	9	0.311	4	0.219	0.293271	0.092	_	0.218533	0.310542
P54254	Ataxin-1 (Spinocerebellar ataxia type 1 protein homolog)	psother494	1	791	791	_	Mus musculus	Nuclear body	33356851;32005838	268	399	132	6	92.21	[5.4-6.7]; 91.8	9	81.92	[8.9-9.0]; 82.3	_	90.49	9.2	10.29	False	Folded	None	9	0.096	4	0	0.0603713	0.096	_	0.0383591	0.0962013
P54254	Ataxin-1 (Spinocerebellar ataxia type 1 protein homolog)	psother494	1	791	791	_	Mus musculus	Nuclear body	33356851;32005838	736	772	37	6.3	108.26	[5.7-7.0]; 107.25	9	78.48	[8.9-9.0]; 79.44	_	105.49	10.3	29.78	False	Unfolded	None	9	-0.002	4	-0.142	-0.10743	0.14	_	-0.118704	-0.00192504
P54274	Telomeric repeat-binding factor 1 (NIMA-interacting protein 2) (TTAGGG repeat-binding factor 1) (Telomeric protein Pin2/TRF1)	psother373	1	439	439	_	Homo sapiens	PML nuclear body	32579423	1	36	36	9	145.3	[7.7-9.0]; 142.38	4	61.45	[4.0-4.4]; 65.32	_	128.1	3.6	83.85	True	F->U	4.65	4	0.128	9	-0.309	-0.247399	0.437	_	-0.309433	0.127896
P54274	Telomeric repeat-binding factor 1 (NIMA-interacting protein 2) (TTAGGG repeat-binding factor 1) (Telomeric protein Pin2/TRF1)	psother373	1	439	439	_	Homo sapiens	PML nuclear body	32579423	267	311	45	7.5	131.15	[6.5-8.7]; 130.1	4	97.22	[4.0-4.3]; 98.4	_	130.47	4.6	33.93	True	F->U	5.05	4.6	0.046	7.7	-0.105	-0.100561	0.151	_	-0.104314	0.020267
P54274	Telomeric repeat-binding factor 1 (NIMA-interacting protein 2) (TTAGGG repeat-binding factor 1) (Telomeric protein Pin2/TRF1)	psother373	1	439	439	_	Homo sapiens	PML nuclear body	32579423	326	382	57	5.6	164.05	[4.3-6.4]; 162.48	9	122.94	[8.9-9.0]; 124.02	_	154.6	12.2	41.11	False	Unfolded	None	9	-0.215	4	-0.433	-0.343768	0.218	_	-0.400824	-0.214528
P54397	39 kDa FK506-binding nuclear protein (EC 5.2.1.8) (Peptidyl-prolyl cis-trans isomerase) (PPIase) (Rotamase)	psself227	1	357	357	_	Drosophila melanogaster	_	32615218	85	264	180	7.7	161.7	[6.4-9.0]; 159.8	4	89.01	[4.0-4.2]; 92.41	_	160.08	3.9	72.69	True	F->U	4.25	4	0.062	7.6	-0.328	-0.322831	0.39	_	-0.327534	0.0616587
P54727	UV excision repair protein RAD23 homolog B (HR23B) (hHR23B) (XP-C repair-complementing complex 58 kDa protein) (p58)	psother355	1	409	409	_	Homo sapiens	Proteasome containing foci	32386541;32025036	80	191	112	7.7	38.25	[6.4-9.0]; 37.77	4	22.2	[4.0-4.2]; 22.84	_	37.94	3.9	16.05	False	Folded	None	4	0.323	7.7	0.23	0.231452	0.093	_	0.229923	0.323309
P54727	UV excision repair protein RAD23 homolog B (HR23B) (hHR23B) (XP-C repair-complementing complex 58 kDa protein) (p58)	psother355	1	409	409	_	Homo sapiens	Proteasome containing foci	32386541;32025036	232	281	50	8.7	49.89	[7.6-9.0]; 49.32	4	30.72	[4.0-4.5]; 31.52	_	46.2	4.5	19.17	False	Folded	None	4.4	0.306	8.8	0.218	0.231932	0.088	_	0.218143	0.295101
P54727	UV excision repair protein RAD23 homolog B (HR23B) (hHR23B) (XP-C repair-complementing complex 58 kDa protein) (p58)	psother355	1	409	409	_	Homo sapiens	Proteasome containing foci	32386541;32025036	324	351	28	9	29.77	[6.8-9.0]; 29.32	4	8.31	[4.0-4.3]; 9.08	_	28.42	1.8	21.46	False	Folded	None	4	0.345	9	0.197	0.202516	0.148	_	0.197088	0.344535
P54785	Transcriptional activator/repressor MOT3 (Hypoxic gene repressor protein 7) (Modulator of transcription protein 3)	psother203	1	490	490	_	Saccharomyces cerevisiae	Hyperosmotic shock foci	31285266	1	170	170	5	73.69	[4.4-5.4]; 73.55	6.4	69.8	[6.4-6.6]; 69.9	_	70.74	7	3.89	False	Folded	None	6.4	0.148	4	0.096	0.137485	0.052	_	0.105244	0.147793
P54785	Transcriptional activator/repressor MOT3 (Hypoxic gene repressor protein 7) (Modulator of transcription protein 3)	psother203	1	490	490	_	Saccharomyces cerevisiae	Hyperosmotic shock foci	31285266	207	339	133	4	40.35	[4.0-5.2]; 39.98	9	25.85	[7.4-9.0]; 26.47	_	28.23	10.1	14.5	False	Folded	None	9	0.313	4	0.189	0.29736	0.124	_	0.189161	0.312746
P54785	Transcriptional activator/repressor MOT3 (Hypoxic gene repressor protein 7) (Modulator of transcription protein 3)	psother203	1	490	490	_	Saccharomyces cerevisiae	Hyperosmotic shock foci	31285266	413	461	49	9	98.94	[8.1-9.0]; 97.63	4	67.47	[4.0-4.4]; 68.88	_	90.46	1.8	31.47	True	F->U	6.95	4	0.112	9	-0.028	-0.00144461	0.14	_	-0.0280503	0.112332
P55072	Transitional endoplasmic reticulum ATPase (TER ATPase) (EC 3.6.4.6) (15S Mg(2+)-ATPase p97 subunit) (Valosin-containing protein) (VCP)	psother356	1	806	806	_	Homo sapiens	Proteasome containing foci	32386541;32025036	706	736	31	8.5	168.89	[7.3-9.0]; 166.83	4	94.92	[4.0-4.4]; 97.56	_	158.52	4.4	73.97	True	F->U	4.75	4.4	0.055	8.5	-0.305	-0.265614	0.36	_	-0.305382	0.0133363
P55072	Transitional endoplasmic reticulum ATPase (TER ATPase) (EC 3.6.4.6) (15S Mg(2+)-ATPase p97 subunit) (Valosin-containing protein) (VCP)	psother356	1	806	806	_	Homo sapiens	Proteasome containing foci	32386541;32025036	769	806	38	9	72.02	[8.1-9.0]; 70.25	4	28.34	[4.0-4.4]; 30.2	_	58.86	3.3	43.68	False	Folded	None	4	0.238	9	0.049	0.0916972	0.189	_	0.0488604	0.237746
P55795	Heterogeneous nuclear ribonucleoprotein H2 (hnRNP H2) (FTP-3) (Heterogeneous nuclear ribonucleoprotein H') (hnRNP H') [Cleaved into: Heterogeneous nuclear ribonucleoprotein H2; N-terminally processed]	psself106	1	449	449	_	Homo sapiens	_	29961577	195	217	23	8	69.46	[7.1-8.6]; 68.88	4	52.99	[4.0-4.3]; 53.74	_	67.73	11.4	16.47	False	Folded	None	4.5	0.056	8	0.016	0.0218799	0.04	_	0.015683	0.0506902
P55854	Small ubiquitin-related modifier 3 (SUMO-3) (SMT3 homolog 1) (SUMO-2) (Ubiquitin-like protein SMT3A) (Smt3A)	psother442	1	103	103	_	Homo sapiens	PML nuclear body	33068409;31171703	58	103	46	9	77.88	[7.9-9.0]; 75.75	4	17.47	[4.0-4.4]; 20.37	_	64.16	3.6	60.41	True	F->U	7.25	4	0.319	9	-0.049	0.012333	0.368	_	-0.0490818	0.318557
P55884	Eukaryotic translation initiation factor 3 subunit B (eIF3b) (Eukaryotic translation initiation factor 3 subunit 9) (Prt1 homolog) (hPrt1) (eIF-3-eta) (eIF3 p110) (eIF3 p116)	psother524	1	814	814	_	Homo sapiens	_	33549703;30893049	1	177	177	8.8	111.74	[7.2-9.0]; 109.59	4	41.22	[4.0-4.2]; 43.61	_	103.24	3.5	70.52	True	F->U	5.45	4	0.228	8.9	-0.14	-0.107399	0.368	_	-0.13976	0.228171
P56959	RNA-binding protein FUS (Protein pigpen)	psself268	1	518	518	_	Mus musculus	_	33159853	1	286	286	8.7	75.3	[7.9-9.0]; 75.07	4.2	66.52	[4.0-4.9]; 66.75	_	72.53	7	8.78	False	Folded	None	4.6	0.159	8.6	0.133	0.142718	0.026	_	0.133541	0.15759
P56959	RNA-binding protein FUS (Protein pigpen)	psself268	1	518	518	_	Mus musculus	_	33159853	326	348	23	8.7	30.49	[7.4-9.0]; 29.06	4	-15.45	[4.0-4.3]; -13.38	_	23.46	3.7	45.94	False	Folded	None	4	0.418	8.9	0.164	0.193727	0.254	_	0.164108	0.417622
P56959	RNA-binding protein FUS (Protein pigpen)	psself268	1	518	518	_	Mus musculus	_	33159853	357	426	70	6.6	71.58	[5.6-7.7]; 71.36	9	65.12	[9.0-9.0]; 65.12	_	71.49	12.4	6.46	False	Folded	None	9	0.05	6.8	0.028	0.0279828	0.022	_	0.0280192	0.0500769
P56959	RNA-binding protein FUS (Protein pigpen)	psself268	1	518	518	_	Mus musculus	_	33159853	437	518	82	8.1	133.53	[7.3-8.7]; 132.8	4	111.65	[4.0-4.3]; 112.42	_	130.37	10.9	21.88	False	Unfolded	None	4.7	-0.117	8.2	-0.153	-0.140886	0.036	_	-0.15293	-0.129409
P58555	Ribulose bisphosphate carboxylase/oxygenase activase (RA) (RuBisCO activase)	psother429	1	414	414	_	Nostoc sp.	_	32979320	293	333	41	6	80.72	[5.3-6.7]; 80.26	9	67.99	[8.9-9.0]; 68.35	_	78.45	9.6	12.73	False	Folded	None	9	0.166	4	0.036	0.118757	0.13	_	0.0872031	0.166294
P62491	Ras-related protein Rab-11A (Rab-11) (EC 3.6.5.2) (YL8)	psother401	1	216	216	_	Homo sapiens	_	32835749;30967547	183	214	32	6.9	71.31	[6.1-8.0]; 70.83	4	57.02	[4.0-4.2]; 57.5	_	71.3	7	14.29	False	Folded	None	9	0.184	4	0.132	0.162064	0.052	_	0.161363	0.131789
P62750	60S ribosomal protein L23a (Large ribosomal subunit protein uL23)	psother43	47	68	22	_	Homo sapiens	Nucleolus	26836305	47	69	23	4	178.53	[4.0-6.0]; 177.36	9	126.98	[8.9-9.0]; 128.52	_	164.25	13.3	51.55	False	Unfolded	None	9	-0.518	4	-0.708	-0.656997	0.19	_	-0.708355	-0.518315
P62995	Transformer-2 protein homolog beta (TRA-2 beta) (TRA2-beta) (hTRA2-beta) (Splicing factor; arginine/serine-rich 10) (Transformer-2 protein homolog B)	psother212	1	288	288	_	Homo sapiens	_	31363225	1	116	116	5.9	216.49	[5.2-7.0]; 215.98	9	203.2	[9.0-9.0]; 203.2	_	215.24	12.7	13.29	False	Unfolded	None	9	-0.521	4	-0.652	-0.573619	0.131	_	-0.608518	-0.521354
P62995	Transformer-2 protein homolog beta (TRA-2 beta) (TRA2-beta) (hTRA2-beta) (Splicing factor; arginine/serine-rich 10) (Transformer-2 protein homolog B)	psother212	1	288	288	_	Homo sapiens	_	31363225	261	288	28	5.3	171.44	[4.0-7.7]; 171.29	9	157.34	[9.0-9.0]; 157.34	_	171.2	12.5	14.1	False	Unfolded	None	9	-0.491	4	-0.541	-0.540599	0.05	_	-0.541433	-0.490803
P68400	Casein kinase II subunit alpha (CK II alpha) (EC 2.7.11.1)	psother572	1	391	391	_	Homo sapiens	_	33723425	335	363	29	9	15.66	[4.0-4.0]; 15.66	9	15.66	[4.0-4.0]; 15.66	_	15.66	7	0	False	Folded	None	4	0.357	4	0.357	0.357044	0	_	0.357044	0.357044
P68431	Histone H3.1 (Histone H3/a) (Histone H3/b) (Histone H3/c) (Histone H3/d) (Histone H3/f) (Histone H3/h) (Histone H3/i) (Histone H3/j) (Histone H3/k) (Histone H3/l)	psother246	1	136	136	_	Homo sapiens	_	31481798	1	41	41	4	138.18	[4.0-5.8]; 136.63	9	74.33	[8.8-9.0]; 76.76	_	114.93	13.8	63.85	False	Unfolded	None	9	-0.141	4	-0.401	-0.296443	0.26	_	-0.400806	-0.140639
P78344	Eukaryotic translation initiation factor 4 gamma 2 (eIF-4-gamma 2) (eIF-4G 2) (eIF4G 2) (Death-associated protein 5) (DAP-5) (p97)	psself79	13	97	85	_	Homo sapiens	_	29425497	13	82	70	6.1	96.35	[5.5-6.9]; 95.91	9	83.38	[8.9-9.0]; 83.91	_	94.87	11.4	12.97	True	U->F	7.65	9	0.035	4	-0.043	-0.00851056	0.078	_	-0.0217485	0.0347501
P78352	Disks large homolog 4 (Postsynaptic density protein 95) (PSD-95) (Synapse-associated protein 90) (SAP-90) (SAP90)	psother117	1	724	724	_	Homo sapiens	Postsynaptic density	30078712	15	43	29	9	63.7	[8.1-9.0]; 61.62	4	17.41	[4.0-4.4]; 19.57	_	50.77	3.8	46.29	False	Folded	None	4	0.324	9	0.023	0.0762462	0.301	_	0.0226927	0.324193
P78953	Anillin-related medial ring protein mid1	psself146	1	452	452	pH 7.4	Schizosaccharomyces pombe	_	31243991	92	119	28	6	105.23	[5.4-6.8]; 104.88	9	95.54	[9.0-9.0]; 95.54	Middle	103.93	12.2	9.69	False	Unfolded	None	9	-0.038	4	-0.107	-0.0735275	0.069	Unfolded	-0.0925924	-0.0375059
P78953	Anillin-related medial ring protein mid1	psself146	1	452	452	pH 7.4	Schizosaccharomyces pombe	_	31243991	192	311	120	8.7	62.75	[7.3-9.0]; 61.62	4	23.68	[4.0-4.3]; 24.81	10% maximum solubility	57.5	4.2	39.07	False	Folded	None	4.1	0.323	8.6	0.118	0.136763	0.205	Folded	0.11832	0.318124
P78953	Anillin-related medial ring protein mid1	psself146	1	452	452	pH 7.4	Schizosaccharomyces pombe	_	31243991	369	395	27	9	74.23	[7.6-9.0]; 72.29	4	21.99	[4.0-4.3]; 23.95	Middle	64.94	3.3	52.24	True	F->U	6.65	4	0.247	9	-0.049	-0.0137574	0.296	Unfolded	-0.0489201	0.247349
P80723	Brain acid soluble protein 1 (22 kDa neuronal tissue-enriched acidic protein) (Neuronal axonal membrane protein NAP-22)	psself240	1	227	227	_	Homo sapiens	_	32750402	1	227	227	6.7	110.59	[6.0-7.4]; 109.35	4.4	75.42	[4.0-4.5]; 76.48	_	109.85	4.3	35.17	Possible Multitransition	Variable	[5.5499999999999945; 8.449999999999985]	4.4	0.136	6.7	-0.043	-0.0412751	0.179	_	-0.0434624	0.135533
P81133	Single-minded homolog 1 (Class E basic helix-loop-helix protein 14) (bHLHe14)	psother558	1	766	766	_	Homo sapiens	_	33650968	358	382	25	5.3	145.27	[4.0-6.3]; 144.16	9	107.82	[8.8-9.0]; 109.56	_	134.93	12.5	37.45	False	Unfolded	None	9	-0.17	4	-0.313	-0.272131	0.143	_	-0.310302	-0.169675
P81133	Single-minded homolog 1 (Class E basic helix-loop-helix protein 14) (bHLHe14)	psother558	1	766	766	_	Homo sapiens	_	33650968	386	428	43	9	83.74	[8.0-9.0]; 81.85	4	35.89	[4.0-4.4]; 38.15	_	70.26	4	47.85	True	F->U	7.95	4	0.266	9	-0.02	0.03656	0.286	_	-0.0202057	0.26551
P81133	Single-minded homolog 1 (Class E basic helix-loop-helix protein 14) (bHLHe14)	psother558	1	766	766	_	Homo sapiens	_	33650968	527	595	69	8.2	106.18	[6.9-9.0]; 105.18	4	70.01	[4.0-4.5]; 71.62	_	103.48	4.6	36.17	True	F->U	6.15	4.6	0.125	8	-0.041	-0.0325475	0.166	_	-0.0403866	0.0965896
P81133	Single-minded homolog 1 (Class E basic helix-loop-helix protein 14) (bHLHe14)	psother558	1	766	766	_	Homo sapiens	_	33650968	616	662	47	8.6	79.5	[7.4-9.0]; 78.82	4	56.63	[4.0-4.4]; 57.63	_	75.94	5.2	22.87	False	Folded	None	5.1	0.156	8.5	0.043	0.0598934	0.113	_	0.0429328	0.132517
P81133	Single-minded homolog 1 (Class E basic helix-loop-helix protein 14) (bHLHe14)	psother558	1	766	766	_	Homo sapiens	_	33650968	743	763	21	5.3	52.64	[4.6-5.8]; 52.27	9	41.6	[8.8-9.0]; 42.12	_	47.19	11.4	11.04	False	Folded	None	9	0.199	4	0.063	0.16966	0.136	_	0.0808995	0.199288
P84022	Mothers against decapentaplegic homolog 3 (MAD homolog 3) (Mad3) (Mothers against DPP homolog 3) (hMAD-3) (JV15-2) (SMAD family member 3) (SMAD 3) (Smad3) (hSMAD3)	psself309	1	425	425	_	Homo sapiens	Mediator condensate	33357399;31563432	161	216	56	9	55.63	[7.9-9.0]; 54.13	4	18.88	[4.0-4.3]; 20.29	_	47.9	3.8	36.75	False	Folded	None	4	0.312	9	0.05	0.0870827	0.262	_	0.0495371	0.312337
P90786	Piwi-like protein	psother404	1	824	824	_	Caenorhabditis elegans	P granule	32843637	1	24	24	6	145.41	[5.1-6.8]; 144.92	9	131.46	[8.9-9.0]; 132.06	_	143.69	12.8	13.95	False	Unfolded	None	9	-0.21	5.7	-0.276	-0.265085	0.066	_	-0.275614	-0.209906
P91349	Spindle-defective protein 5	psself58	1	1198	1198	pH 7.4	Caenorhabditis elegans	Pericentriolar matrix	28575670	1	49	49	8.5	110.44	[7.2-9.0]; 109.45	4	73.95	[4.0-4.4]; 75.34	10% maximum solubility	106.03	4.3	36.49	True	F->U	5.75	4.3	0.122	8.3	-0.061	-0.0480117	0.183	Unfolded	-0.0611983	0.110161
P91349	Spindle-defective protein 5	psself58	1	1198	1198	pH 7.4	Caenorhabditis elegans	Pericentriolar matrix	28575670	230	250	21	8.8	158.1	[7.7-9.0]; 155.99	4	90.64	[4.0-4.4]; 93.43	Middle	143.05	4.2	67.46	True	F->U	4.45	4.1	0.057	8.8	-0.271	-0.217152	0.328	Unfolded	-0.271425	0.0539944
P91349	Spindle-defective protein 5	psself58	1	1198	1198	pH 7.4	Caenorhabditis elegans	Pericentriolar matrix	28575670	401	443	43	8.9	101.69	[7.7-9.0]; 99.94	4	45.47	[4.0-4.3]; 47.58	Middle	90.69	3.7	56.22	True	F->U	5.95	4	0.199	8.8	-0.085	-0.0494564	0.284	Unfolded	-0.084619	0.198524
P91349	Spindle-defective protein 5	psself58	1	1198	1198	pH 7.4	Caenorhabditis elegans	Pericentriolar matrix	28575670	461	493	33	8.9	70.71	[7.8-9.0]; 69.85	4	41.91	[4.0-4.4]; 43.15	Middle	64.24	4.4	28.8	False	Folded	None	4.3	0.237	8.9	0.082	0.108312	0.155	Folded	0.0824563	0.227989
P91349	Spindle-defective protein 5	psself58	1	1198	1198	pH 7.4	Caenorhabditis elegans	Pericentriolar matrix	28575670	508	544	37	5.1	100.39	[4.0-5.8]; 99.72	9	73.06	[8.7-9.0]; 74.1	Middle	87.81	9.6	27.33	True	U->F	6.35	9	0.118	4	-0.129	0.0502729	0.247	Folded	-0.0964951	0.117536
P91349	Spindle-defective protein 5	psself58	1	1198	1198	pH 7.4	Caenorhabditis elegans	Pericentriolar matrix	28575670	712	735	24	7.4	121.12	[6.5-8.3]; 120.45	4	100.18	[4.0-4.3]; 100.98	10% maximum solubility	120.76	12	20.94	False	Unfolded	None	4.9	-0.061	7.4	-0.096	-0.0951055	0.035	Unfolded	-0.0961327	-0.0845014
P91349	Spindle-defective protein 5	psself58	1	1198	1198	pH 7.4	Caenorhabditis elegans	Pericentriolar matrix	28575670	814	838	25	6.6	104.43	[6.0-7.2]; 103.72	4	82.05	[4.0-4.2]; 82.74	10% maximum solubility	103.58	5.7	22.38	False	Folded	None	5.2	0.062	6.9	0.003	0.0028756	0.059	Folded	0.00461608	0.0116439
P91349	Spindle-defective protein 5	psself58	1	1198	1198	pH 7.4	Caenorhabditis elegans	Pericentriolar matrix	28575670	860	905	46	6.8	141.74	[6.2-7.6]; 140.54	4	107.73	[4.0-4.4]; 109.27	10% maximum solubility	141.47	4.8	34.01	False	Unfolded	None	4.8	-0.024	7	-0.186	-0.18578	0.162	Folded	-0.184377	-0.0909792
P91349	Spindle-defective protein 5	psself58	1	1198	1198	pH 7.4	Caenorhabditis elegans	Pericentriolar matrix	28575670	1021	1062	42	5.8	62.95	[5.0-6.5]; 62.33	9	46.24	[8.8-9.0]; 46.87	Middle	58.82	7.9	16.71	False	Folded	None	9	0.258	4	0.125	0.209722	0.133	Folded	0.169369	0.258014
P97836	Disks large-associated protein 1 (DAP-1) (Guanylate kinase-associated protein) (rGKAP) (PSD-95/SAP90-binding protein 1) (SAP90/PSD-95-associated protein 1) (SAPAP1)	psother470	1	992	992	_	Rattus norvegicus	Postsynaptic density	33235361	68	96	29	6.4	83.72	[5.8-7.1]; 83.33	9	71.52	[8.9-9.0]; 72.05	_	82.93	10.3	12.2	False	Non-confident transition	None	9	0.072	4	-0.018	0.0260449	0.09	_	0.0167951	0.0719412
P97836	Disks large-associated protein 1 (DAP-1) (Guanylate kinase-associated protein) (rGKAP) (PSD-95/SAP90-binding protein 1) (SAP90/PSD-95-associated protein 1) (SAPAP1)	psother470	1	992	992	_	Rattus norvegicus	Postsynaptic density	33235361	118	144	27	5.4	120.35	[4.7-5.9]; 119.85	9	105.03	[8.9-9.0]; 105.54	_	114.07	11.4	15.32	False	Unfolded	None	9	-0.084	4	-0.3	-0.130563	0.216	_	-0.256082	-0.0836932
P97836	Disks large-associated protein 1 (DAP-1) (Guanylate kinase-associated protein) (rGKAP) (PSD-95/SAP90-binding protein 1) (SAP90/PSD-95-associated protein 1) (SAPAP1)	psother470	1	992	992	_	Rattus norvegicus	Postsynaptic density	33235361	152	208	57	5.8	118.19	[4.8-6.6]; 117.27	9	93.74	[8.9-9.0]; 94.43	_	113.5	11.4	24.45	False	Unfolded	None	9	-0.066	4	-0.202	-0.151949	0.136	_	-0.180577	-0.0663358
P97836	Disks large-associated protein 1 (DAP-1) (Guanylate kinase-associated protein) (rGKAP) (PSD-95/SAP90-binding protein 1) (SAP90/PSD-95-associated protein 1) (SAPAP1)	psother470	1	992	992	_	Rattus norvegicus	Postsynaptic density	33235361	354	382	29	7.9	117.94	[6.7-8.9]; 116.8	4	81.33	[4.0-4.3]; 82.86	_	116.16	4.8	36.61	True	F->U	5.85	4.6	0.096	8	-0.042	-0.0350702	0.138	_	-0.0422916	0.0726223
P97836	Disks large-associated protein 1 (DAP-1) (Guanylate kinase-associated protein) (rGKAP) (PSD-95/SAP90-binding protein 1) (SAP90/PSD-95-associated protein 1) (SAPAP1)	psother470	1	992	992	_	Rattus norvegicus	Postsynaptic density	33235361	513	533	21	7.4	68.46	[6.6-8.0]; 68.25	4	61.62	[4.0-4.4]; 61.88	_	68.31	12.2	6.84	False	Folded	None	9	0.075	7.4	0.057	0.0573121	0.018	_	0.0565283	0.0598659
P97836	Disks large-associated protein 1 (DAP-1) (Guanylate kinase-associated protein) (rGKAP) (PSD-95/SAP90-binding protein 1) (SAP90/PSD-95-associated protein 1) (SAPAP1)	psother470	1	992	992	_	Rattus norvegicus	Postsynaptic density	33235361	552	575	24	4	7.73	[4.0-5.9]; 6.77	9	-30.4	[8.8-9.0]; -29.03	_	-5.77	11.6	38.13	False	Folded	None	9	0.359	4	0.219	0.267112	0.14	_	0.218593	0.359058
P97836	Disks large-associated protein 1 (DAP-1) (Guanylate kinase-associated protein) (rGKAP) (PSD-95/SAP90-binding protein 1) (SAP90/PSD-95-associated protein 1) (SAPAP1)	psother470	1	992	992	_	Rattus norvegicus	Postsynaptic density	33235361	581	610	30	9	107.46	[8.1-9.0]; 105.34	4	54.59	[4.0-4.4]; 56.81	_	91.63	3.3	52.87	True	F->U	5.95	4	0.147	9	-0.107	-0.0479856	0.254	_	-0.106942	0.146668
P97836	Disks large-associated protein 1 (DAP-1) (Guanylate kinase-associated protein) (rGKAP) (PSD-95/SAP90-binding protein 1) (SAP90/PSD-95-associated protein 1) (SAPAP1)	psother470	1	992	992	_	Rattus norvegicus	Postsynaptic density	33235361	619	654	36	9	37.28	[7.8-9.0]; 36.61	4	22.04	[4.0-4.4]; 22.6	_	34.27	4.4	15.24	False	Folded	None	4.3	0.323	9	0.204	0.218574	0.119	_	0.203622	0.312692
P97836	Disks large-associated protein 1 (DAP-1) (Guanylate kinase-associated protein) (rGKAP) (PSD-95/SAP90-binding protein 1) (SAP90/PSD-95-associated protein 1) (SAPAP1)	psother470	1	992	992	_	Rattus norvegicus	Postsynaptic density	33235361	670	691	22	7.1	134.67	[6.3-8.3]; 133.14	4	89.61	[4.0-4.2]; 91.01	_	134.62	4	45.06	True	F->U	4.45	4	0.06	7.1	-0.218	-0.218022	0.278	_	-0.218048	0.0604606
P97836	Disks large-associated protein 1 (DAP-1) (Guanylate kinase-associated protein) (rGKAP) (PSD-95/SAP90-binding protein 1) (SAP90/PSD-95-associated protein 1) (SAPAP1)	psother470	1	992	992	_	Rattus norvegicus	Postsynaptic density	33235361	730	754	25	8.8	83.3	[7.7-9.0]; 82.15	4	41.31	[4.0-4.4]; 43.22	_	74.74	4	41.99	False	Folded	None	4	0.254	8.8	0.023	0.0550776	0.231	_	0.0233206	0.253593
P97836	Disks large-associated protein 1 (DAP-1) (Guanylate kinase-associated protein) (rGKAP) (PSD-95/SAP90-binding protein 1) (SAP90/PSD-95-associated protein 1) (SAPAP1)	psother470	1	992	992	_	Rattus norvegicus	Postsynaptic density	33235361	914	974	61	6.1	117.48	[5.2-6.8]; 116.51	9	89.52	[8.9-9.0]; 90.46	_	113.81	12.2	27.96	False	Unfolded	None	9	-0.066	4	-0.187	-0.158615	0.121	_	-0.172479	-0.0655194
P98179	RNA-binding protein 3 (RNA-binding motif protein 3) (RNPL)	psself7	1	157	157	_	Homo sapiens	_	22579281	73	118	46	8	121.81	[7.3-8.4]; 121.54	4	114.18	[4.0-4.2]; 114.48	_	120.72	11.8	7.63	False	Unfolded	None	9	-0.118	4	-0.174	-0.137836	0.056	_	-0.136976	-0.173986
P98179	RNA-binding protein 3 (RNA-binding motif protein 3) (RNPL)	psself7	1	157	157	_	Homo sapiens	_	22579281	128	157	30	8.7	144.26	[7.8-9.0]; 143.03	4	102.88	[4.0-4.5]; 104.84	_	132.55	9.4	41.38	False	Unfolded	None	4.5	-0.033	8.6	-0.154	-0.111578	0.121	_	-0.154206	-0.0416899
P9WHW5	Serine/threonine protein phosphatase PstP (EC 3.1.3.16) (Mycobacterial Ser/Thr phosphatase) (Mstp) (PP2C-family Ser/Thr phosphatase)	psother214	1	240	240	_	Mycobacterium tuberculosis	_	31366629	143	164	22	8.3	108.56	[7.2-9.0]; 107.6	4	75.5	[4.0-4.4]; 77.05	_	104.69	6.6	33.06	Possible Multitransition	Variable	[4.249999999999999; 6.649999999999991]	6	0.042	8.3	-0.039	-0.0172502	0.081	_	-0.038535	-0.0199181
Q00613	Heat shock factor protein 1 (HSF 1) (Heat shock transcription factor 1) (HSTF 1)	psother307	1	529	529	_	Homo sapiens	Transcriptional condensate	32015439	269	325	57	8.1	61.42	[6.9-9.0]; 60.64	4	32.04	[4.0-4.4]; 32.99	_	59.35	4.3	29.38	False	Folded	None	4.3	0.271	7.9	0.129	0.134297	0.142	_	0.129443	0.256413
Q00613	Heat shock factor protein 1 (HSF 1) (Heat shock transcription factor 1) (HSTF 1)	psother307	1	529	529	_	Homo sapiens	Transcriptional condensate	32015439	327	380	54	8.6	51.43	[7.4-9.0]; 50.51	4	17.94	[4.0-4.4]; 19.3	_	46.44	4.2	33.49	False	Folded	None	4.2	0.31	8.7	0.12	0.142422	0.19	_	0.119716	0.301312
Q00613	Heat shock factor protein 1 (HSF 1) (Heat shock transcription factor 1) (HSTF 1)	psother307	1	529	529	_	Homo sapiens	Transcriptional condensate	32015439	428	465	38	8.7	74.81	[7.3-9.0]; 73.65	4	32.14	[4.0-4.3]; 33.86	_	69.32	3.6	42.67	False	Folded	None	4	0.266	8.8	0.02	0.0421982	0.246	_	0.0204935	0.26595
Q00960	Glutamate receptor ionotropic; NMDA 2B (GluN2B) (Glutamate [NMDA] receptor subunit epsilon-2) (N-methyl D-aspartate receptor subtype 2B) (NMDAR2B) (NR2B)	psother471	1170	1482	313	_	Rattus norvegicus	Postsynaptic density	33235361	1171	1204	34	5.3	67.22	[4.0-6.1]; 66.24	9	40.15	[8.8-9.0]; 41.11	_	57.69	9.6	27.07	False	Non-confident transition	None	9	0.207	4	-0.006	0.131076	0.213	_	0.0291281	0.207157
Q00960	Glutamate receptor ionotropic; NMDA 2B (GluN2B) (Glutamate [NMDA] receptor subunit epsilon-2) (N-methyl D-aspartate receptor subtype 2B) (NMDAR2B) (NR2B)	psother471	1170	1482	313	_	Rattus norvegicus	Postsynaptic density	33235361	1256	1306	51	6.1	104.67	[5.5-6.8]; 104.21	9	90.53	[8.9-9.0]; 91.04	_	102.85	9.8	14.14	True	U->F	6.85	9	0.063	4	-0.044	0.00346865	0.107	_	-0.0154146	0.0626856
Q00960	Glutamate receptor ionotropic; NMDA 2B (GluN2B) (Glutamate [NMDA] receptor subunit epsilon-2) (N-methyl D-aspartate receptor subtype 2B) (NMDAR2B) (NR2B)	psother471	1170	1482	313	_	Rattus norvegicus	Postsynaptic density	33235361	1347	1374	28	4	74.54	[4.0-5.4]; 73.66	9	42.61	[8.6-9.0]; 43.91	_	56.89	10.3	31.93	True	U->F	5.55	9	0.178	4	-0.041	0.114766	0.219	_	-0.0408132	0.177811
Q00994	Protein BEX3 (Brain-expressed X-linked protein 3) (Nerve growth factor receptor-associated protein 1) (Ovarian granulosa cell 13.0 kDa protein HGR74) (p75NTR-associated cell death executor)	psother318	26	63	38	_	Homo sapiens	Neuronal granule	32142787	26	64	39	8.3	86.04	[7.5-8.8]; 85.49	4	68.63	[4.0-4.4]; 69.39	_	82.77	12.5	17.41	False	Folded	None	9	0.055	4	0.037	0.048963	0.018	_	0.0427489	0.0374052
Q01085	Nucleolysin TIAR (TIA-1-related protein)	psother525	1	375	375	_	Homo sapiens	_	33549703;30893049	168	195	28	6.2	89.2	[5.5-6.9]; 88.5	9	68.01	[8.9-9.0]; 68.74	_	87	11.4	21.19	True	U->F	7.55	9	0.057	4	-0.035	-0.0136163	0.092	_	-0.0213922	0.0565378
Q01085	Nucleolysin TIAR (TIA-1-related protein)	psother525	1	375	375	_	Homo sapiens	_	33549703;30893049	342	367	26	9	-38.35	[4.0-4.0]; -38.35	9	-38.35	[4.0-4.0]; -38.35	_	-38.35	7	0	False	Folded	None	4	0.554	4	0.554	0.554476	0	_	0.554476	0.554476
Q01097	Glutamate receptor ionotropic; NMDA 2B (GluN2B) (Glutamate [NMDA] receptor subunit epsilon-2) (N-methyl D-aspartate receptor subtype 2B) (NMDAR2B) (NR2B)	psother256	1	1482	1482	_	Mus musculus	Postsynaptic density	31492534	1067	1098	32	5.5	127.6	[4.0-6.4]; 126.01	9	83.74	[8.8-9.0]; 85.82	_	116.76	10.9	43.86	False	Unfolded	None	9	-0.108	4	-0.289	-0.23591	0.181	_	-0.27761	-0.107889
Q01097	Glutamate receptor ionotropic; NMDA 2B (GluN2B) (Glutamate [NMDA] receptor subunit epsilon-2) (N-methyl D-aspartate receptor subtype 2B) (NMDAR2B) (NR2B)	psother256	1	1482	1482	_	Mus musculus	Postsynaptic density	31492534	1100	1123	24	7.9	129.99	[6.8-8.6]; 128.85	4	94.37	[4.0-4.3]; 95.74	_	127.73	10.5	35.62	False	Unfolded	None	5	-0.111	4	-0.151	-0.135761	0.04	_	-0.140705	-0.15051
Q01097	Glutamate receptor ionotropic; NMDA 2B (GluN2B) (Glutamate [NMDA] receptor subunit epsilon-2) (N-methyl D-aspartate receptor subtype 2B) (NMDAR2B) (NR2B)	psother256	1	1482	1482	_	Mus musculus	Postsynaptic density	31492534	1165	1195	31	5.3	75.48	[4.6-5.9]; 74.98	9	62.38	[8.8-9.0]; 62.93	_	69.16	9.2	13.1	False	Non-confident transition	None	9	0.141	4	-0.006	0.105753	0.147	_	0.014088	0.140528
Q01097	Glutamate receptor ionotropic; NMDA 2B (GluN2B) (Glutamate [NMDA] receptor subunit epsilon-2) (N-methyl D-aspartate receptor subtype 2B) (NMDAR2B) (NR2B)	psother256	1	1482	1482	_	Mus musculus	Postsynaptic density	31492534	1256	1306	51	6.1	104.67	[5.5-6.8]; 104.21	9	90.53	[8.9-9.0]; 91.04	_	102.85	9.8	14.14	True	U->F	6.75	9	0.064	4	-0.043	0.00470301	0.107	_	-0.0141802	0.06392
Q01097	Glutamate receptor ionotropic; NMDA 2B (GluN2B) (Glutamate [NMDA] receptor subunit epsilon-2) (N-methyl D-aspartate receptor subtype 2B) (NMDAR2B) (NR2B)	psother256	1	1482	1482	_	Mus musculus	Postsynaptic density	31492534	1350	1374	25	4	98.81	[4.0-5.4]; 97.81	9	61.15	[8.6-9.0]; 62.74	_	78.45	10.3	37.66	True	U->F	6.45	9	0.115	4	-0.13	0.0440882	0.245	_	-0.130216	0.115241
Q01130	Serine/arginine-rich splicing factor 2 (Protein PR264) (Splicing component; 35 kDa) (Splicing factor SC35) (SC-35) (Splicing factor; arginine/serine-rich 2)	psother395	1	221	221	_	Homo sapiens	Nuclear speckle	32824618;31391587	1	23	23	8.4	44.38	[7.2-9.0]; 43.59	4	16.94	[4.0-4.3]; 17.97	_	41.01	4.3	27.44	False	Folded	None	4.2	0.343	8.5	0.207	0.219888	0.136	_	0.207186	0.338407
Q01130	Serine/arginine-rich splicing factor 2 (Protein PR264) (Splicing component; 35 kDa) (Splicing factor SC35) (SC-35) (Splicing factor; arginine/serine-rich 2)	psother395	1	221	221	_	Homo sapiens	Nuclear speckle	32824618;31391587	68	221	154	6.5	196.11	[5.6-7.4]; 195.59	9	180.1	[9.0-9.0]; 180.1	_	195.66	12.8	16.01	False	Unfolded	None	9	-0.444	4	-0.53	-0.507137	0.086	_	-0.511732	-0.444196
Q01844	RNA-binding protein EWS (EWS oncogene) (Ewing sarcoma breakpoint region 1 protein)	psother102	1	656	656	_	Homo sapiens	_	29930090	63	102	40	9	12.51	[8.3-9.0]; 12.1	4	2.9	[4.0-4.4]; 3.29	_	9.1	1.8	9.61	False	Folded	None	4	0.387	9	0.352	0.362076	0.035	_	0.352369	0.386893
Q01844	RNA-binding protein EWS (EWS oncogene) (Ewing sarcoma breakpoint region 1 protein)	psother102	1	656	656	_	Homo sapiens	_	29930090	118	369	252	8.7	62.85	[7.6-9.0]; 62.32	4.3	43.91	[4.0-4.6]; 44.24	_	59.13	4.6	18.94	False	Folded	None	4.4	0.246	8.6	0.166	0.179834	0.08	_	0.165778	0.244607
Q01844	RNA-binding protein EWS (EWS oncogene) (Ewing sarcoma breakpoint region 1 protein)	psother102	1	656	656	_	Homo sapiens	_	29930090	395	432	38	7.2	39.32	[6.2-8.6]; 38.4	4	12.35	[4.0-4.3]; 13.53	_	39.23	4.4	26.97	False	Folded	None	4.3	0.317	7.3	0.159	0.159695	0.158	_	0.158858	0.301321
Q01844	RNA-binding protein EWS (EWS oncogene) (Ewing sarcoma breakpoint region 1 protein)	psother102	1	656	656	_	Homo sapiens	_	29930090	438	656	219	7	86.78	[6.1-7.8]; 86.53	9	79.3	[9.0-9.0]; 79.3	_	86.78	12.4	7.48	False	Folded	None	9	0.052	4	0.021	0.0246207	0.031	_	0.0246207	0.051638
Q01844	RNA-binding protein EWS (EWS oncogene) (Ewing sarcoma breakpoint region 1 protein)	psself21	47	266	220	_	Homo sapiens	_	24267890;29424691	63	267	205	8.8	32.13	[7.5-9.0]; 31.95	4	26.53	[4.0-4.2]; 26.75	_	31.19	3.9	5.6	False	Folded	None	4	0.315	8.8	0.29	0.293443	0.025	_	0.289843	0.31505
Q01860	POU domain; class 5; transcription factor 1 (Octamer-binding protein 3) (Oct-3) (Octamer-binding protein 4) (Oct-4) (Octamer-binding transcription factor 3) (OTF-3)	psother363	1	360	360	pH 7.5	Homo sapiens	Mediator condensate;Transcriptional condensate	32434105;30449618	4	59	56	9	-3.02	[8.0-9.0]; -3.98	4	-29.58	[4.0-4.4]; -28.3	Middle	-9.69	3.8	26.56	False	Folded	None	4	0.503	9	0.354	0.379745	0.149	Folded	0.353591	0.502761
Q01860	POU domain; class 5; transcription factor 1 (Octamer-binding protein 3) (Oct-3) (Octamer-binding protein 4) (Oct-4) (Octamer-binding transcription factor 3) (OTF-3)	psother363	1	360	360	pH 7.5	Homo sapiens	Mediator condensate;Transcriptional condensate	32434105;30449618	86	141	56	7.2	86.06	[6.3-8.6]; 84.58	4	47.06	[4.0-4.2]; 48.36	10% maximum solubility	85.91	3.7	39	False	Non-confident transition	None	4	0.235	7.2	-0.015	-0.0142718	0.25	Unfolded	-0.0149651	0.234809
Q02199	Nucleoporin NUP49/NSP49 (Nuclear pore protein NUP49/NSP49)	psself173	1	249	249	_	Saccharomyces cerevisiae	Nuclear pore complex	31723007	26	54	29	4	11.92	[4.0-5.9]; 11.66	9	2.17	[8.7-9.0]; 2.64	_	8.32	12.2	9.75	False	Folded	None	9	0.375	4	0.34	0.352363	0.035	_	0.339807	0.374748
Q02199	Nucleoporin NUP49/NSP49 (Nuclear pore protein NUP49/NSP49)	psself173	1	249	249	_	Saccharomyces cerevisiae	Nuclear pore complex	31723007	57	104	48	4.1	22.45	[4.0-5.9]; 22.29	9	16.46	[8.7-9.0]; 16.74	_	20.24	12.2	5.99	False	Folded	None	9	0.325	4	0.302	0.310404	0.023	_	0.302143	0.325099
Q02199	Nucleoporin NUP49/NSP49 (Nuclear pore protein NUP49/NSP49)	psself173	1	249	249	_	Saccharomyces cerevisiae	Nuclear pore complex	31723007	107	250	144	4.1	37.65	[4.0-5.9]; 37.49	9	31.36	[8.8-9.0]; 31.59	_	35.44	11.4	6.29	False	Folded	None	9	0.275	4	0.252	0.260084	0.023	_	0.251985	0.275481
Q02629	Nucleoporin NUP100/NSP100 (Nuclear pore protein NUP100/NSP100)	psself31	1	580	580	_	Saccharomyces cerevisiae	Nuclear pore complex	25562883;29424691	8	57	50	9	29.25	[4.0-4.0]; 29.25	9	29.25	[4.0-4.0]; 29.25	_	29.25	7	0	False	Folded	None	4	0.285	4	0.285	0.284539	0	_	0.284539	0.284539
Q02629	Nucleoporin NUP100/NSP100 (Nuclear pore protein NUP100/NSP100)	psself31	1	580	580	_	Saccharomyces cerevisiae	Nuclear pore complex	25562883;29424691	64	178	115	4.1	29.27	[4.0-5.9]; 29.2	9	26.76	[8.7-9.0]; 26.88	_	28.34	12.2	2.51	False	Folded	None	9	0.305	4	0.296	0.299192	0.009	_	0.295761	0.305295
Q02629	Nucleoporin NUP100/NSP100 (Nuclear pore protein NUP100/NSP100)	psself31	1	580	580	_	Saccharomyces cerevisiae	Nuclear pore complex	25562883;29424691	181	324	144	4.2	43.44	[4.0-5.9]; 43.34	9	39.38	[8.8-9.0]; 39.54	_	42.05	13.8	4.06	False	Folded	None	9	0.25	4	0.236	0.240618	0.014	_	0.235928	0.249976
Q02629	Nucleoporin NUP100/NSP100 (Nuclear pore protein NUP100/NSP100)	psself31	1	580	580	_	Saccharomyces cerevisiae	Nuclear pore complex	25562883;29424691	330	558	229	5	29.94	[4.0-6.1]; 29.81	9	22.44	[8.8-9.0]; 22.72	_	27.5	10.7	7.5	False	Folded	None	9	0.311	4	0.282	0.291289	0.029	_	0.282058	0.310684
Q02630	Nucleoporin NUP116/NSP116 (Nuclear pore protein NUP116/NSP116)	psother73	1	725	725	_	Saccharomyces cerevisiae	Nuclear pore complex	28343140;17082456	660	726	67	9	43.57	[4.0-4.0]; 43.57	9	43.57	[4.0-4.0]; 43.57	_	43.57	7	0	False	Folded	None	4	0.256	4	0.256	0.255852	0	_	0.255852	0.255852
Q02630	Nucleoporin NUP116/NSP116 (Nuclear pore protein NUP116/NSP116)	psself99	1	736	736	_	Saccharomyces cerevisiae	Nuclear pore complex	29958108	5	98	94	6.4	13.05	[4.0-7.7]; 13.05	9	12.71	[9.0-9.0]; 12.71	_	13.04	14.5	0.34	False	Folded	None	9	0.348	4	0.347	0.346575	0.001	_	0.346562	0.347656
Q02630	Nucleoporin NUP116/NSP116 (Nuclear pore protein NUP116/NSP116)	psself99	1	736	736	_	Saccharomyces cerevisiae	Nuclear pore complex	29958108	104	128	25	6.6	14.3	[6.1-7.3]; 13.98	4	4.32	[4.0-4.3]; 4.67	_	14.02	4.1	9.98	False	Folded	None	4.2	0.376	6.8	0.299	0.300004	0.077	_	0.299686	0.369115
Q02630	Nucleoporin NUP116/NSP116 (Nuclear pore protein NUP116/NSP116)	psself99	1	736	736	_	Saccharomyces cerevisiae	Nuclear pore complex	29958108	162	196	35	4.1	36.41	[4.0-5.9]; 36.19	9	27.03	[8.8-9.0]; 27.45	_	33.36	13.9	9.38	False	Folded	None	9	0.265	4	0.234	0.243885	0.031	_	0.233752	0.265416
Q02630	Nucleoporin NUP116/NSP116 (Nuclear pore protein NUP116/NSP116)	psself99	1	736	736	_	Saccharomyces cerevisiae	Nuclear pore complex	29958108	199	242	44	4	12.52	[4.0-5.9]; 12.34	9	5.98	[8.7-9.0]; 6.29	_	10.11	12.2	6.54	False	Folded	None	9	0.376	4	0.351	0.360086	0.025	_	0.351218	0.375851
Q02630	Nucleoporin NUP116/NSP116 (Nuclear pore protein NUP116/NSP116)	psself99	1	736	736	_	Saccharomyces cerevisiae	Nuclear pore complex	29958108	244	305	62	4.1	31.33	[4.0-5.9]; 31.21	9	26.69	[8.7-9.0]; 26.91	_	29.62	12.2	4.64	False	Folded	None	9	0.3	4	0.285	0.29037	0.015	_	0.284882	0.300193
Q02630	Nucleoporin NUP116/NSP116 (Nuclear pore protein NUP116/NSP116)	psself99	1	736	736	_	Saccharomyces cerevisiae	Nuclear pore complex	29958108	307	359	53	4.2	21.18	[4.0-5.9]; 21.04	9	15.02	[8.8-9.0]; 15.29	_	19.17	13.9	6.16	False	Folded	None	9	0.316	4	0.297	0.303238	0.019	_	0.297345	0.315968
Q02630	Nucleoporin NUP116/NSP116 (Nuclear pore protein NUP116/NSP116)	psself99	1	736	736	_	Saccharomyces cerevisiae	Nuclear pore complex	29958108	361	657	297	4.1	33.24	[4.0-5.9]; 33.06	9	26.18	[8.8-9.0]; 26.42	_	30.67	12.2	7.06	False	Folded	None	9	0.305	4	0.281	0.289816	0.024	_	0.281189	0.30521
Q02630	Nucleoporin NUP116/NSP116 (Nuclear pore protein NUP116/NSP116)	psself99	1	736	736	_	Saccharomyces cerevisiae	Nuclear pore complex	29958108	659	737	79	7	49.47	[4.0-7.8]; 49.47	9	49.07	[9.0-9.0]; 49.07	_	49.47	14.5	0.4	False	Folded	None	9	0.227	4	0.225	0.225482	0.002	_	0.225482	0.226767
Q02796	Transcriptional regulatory protein LGE1 (Large cells protein 1)	psother323	1	243	243	_	Saccharomyces cerevisiae	_	32214243	1	244	244	5.6	103.76	[5.1-6.2]; 103.53	9	97.57	[9.0-9.0]; 97.57	_	102.07	10.1	6.19	False	Non-confident transition	None	9	0.018	4	-0.04	-0.000112749	0.058	_	-0.0229028	0.0181717
Q03513	Carboxysome assembly protein CcmM (CcmM58) (M58) (Carbon dioxide concentrating mechanism protein CcmM) (Carboxysome shell associated protein CcmM)	psother422	196	540	345	pH 8.0	Synechococcus elongatus	_	32966943;30675061	196	222	27	8.7	49.92	[7.7-9.0]; 49.59	4	37.17	[4.0-4.4]; 37.73	10% maximum solubility	47.34	5.2	12.75	False	Folded	None	5.1	0.264	8.8	0.19	0.205483	0.074	Folded	0.189688	0.249148
Q03555	Gephyrin (Putative glycine receptor-tubulin linker protein) [Includes: Molybdopterin adenylyltransferase (MPT adenylyltransferase) (EC 2.7.7.75) (Domain G); Molybdopterin molybdenumtransferase (MPT Mo-transferase) (EC 2.10.1.1) (Domain E)]	psother453	318	736	419	_	Rattus norvegicus	Postsynaptic density	33139925	420	442	23	7.9	18.16	[6.7-9.0]; 17.69	4	0.24	[4.0-4.4]; 0.92	_	17.28	4.1	17.92	False	Folded	None	4.2	0.395	7.9	0.293	0.296331	0.102	_	0.293138	0.388164
Q03690	Clustered mitochondria protein 1 (Translation initiation factor 31) (eIF3-associated protein p135)	psother205	1	1277	1277	_	Saccharomyces cerevisiae	Hyperosmotic shock foci	31285266	12	38	27	5.1	139.71	[4.0-6.0]; 138.24	9	79.85	[8.7-9.0]; 82.76	_	117.53	10.3	59.86	False	Unfolded	None	9	-0.015	4	-0.361	-0.16426	0.346	_	-0.332448	-0.0153144
Q03690	Clustered mitochondria protein 1 (Translation initiation factor 31) (eIF3-associated protein p135)	psother205	1	1277	1277	_	Saccharomyces cerevisiae	Hyperosmotic shock foci	31285266	153	178	26	6.5	189.79	[6.0-7.2]; 188.37	4	146.73	[4.0-4.2]; 148.11	_	187.81	4.8	43.06	False	Unfolded	None	4.9	-0.173	6.6	-0.294	-0.287553	0.121	_	-0.293264	-0.240606
Q03690	Clustered mitochondria protein 1 (Translation initiation factor 31) (eIF3-associated protein p135)	psother205	1	1277	1277	_	Saccharomyces cerevisiae	Hyperosmotic shock foci	31285266	1213	1243	31	5.8	139.71	[5.2-6.5]; 138.89	9	116.54	[8.9-9.0]; 117.18	_	134.41	9.8	23.17	False	Unfolded	None	9	-0.066	4	-0.237	-0.14564	0.171	_	-0.20176	-0.0661762
Q03690	Clustered mitochondria protein 1 (Translation initiation factor 31) (eIF3-associated protein p135)	psother205	1	1277	1277	_	Saccharomyces cerevisiae	Hyperosmotic shock foci	31285266	1255	1277	23	5.2	197.4	[4.0-6.2]; 195.21	9	116.51	[8.8-9.0]; 119.41	_	171.79	10.5	80.89	False	Unfolded	None	9	-0.243	4	-0.627	-0.46583	0.384	_	-0.600711	-0.243161
Q04637	Eukaryotic translation initiation factor 4 gamma 1 (eIF-4-gamma 1) (eIF-4G 1) (eIF-4G1) (p220)	psother526	1	1599	1599	_	Homo sapiens	_	33549703;30893049	1	84	84	4	14.96	[4.0-5.4]; 14.73	9	6.68	[8.8-9.0]; 7.03	_	10.82	12.5	8.28	False	Folded	None	9	0.338	4	0.291	0.322058	0.047	_	0.290542	0.33832
Q04637	Eukaryotic translation initiation factor 4 gamma 1 (eIF-4-gamma 1) (eIF-4G 1) (eIF-4G1) (p220)	psother526	1	1599	1599	_	Homo sapiens	_	33549703;30893049	156	524	369	7.6	69.89	[6.4-9.0]; 68.76	4	24.53	[4.0-4.2]; 25.62	_	69.04	3.9	45.36	False	Folded	None	4	0.319	7.7	0.111	0.114872	0.208	_	0.110951	0.31948
Q04637	Eukaryotic translation initiation factor 4 gamma 1 (eIF-4-gamma 1) (eIF-4G 1) (eIF-4G1) (p220)	psother526	1	1599	1599	_	Homo sapiens	_	33549703;30893049	526	601	76	7.9	86.74	[6.6-9.0]; 85.67	4	38.74	[4.0-4.2]; 40.4	_	84.99	3.8	48	True	F->U	6.05	4	0.249	8	-0.045	-0.0365789	0.294	_	-0.0446556	0.249405
Q04637	Eukaryotic translation initiation factor 4 gamma 1 (eIF-4-gamma 1) (eIF-4G 1) (eIF-4G1) (p220)	psother526	1	1599	1599	_	Homo sapiens	_	33549703;30893049	633	716	84	6.9	59.21	[6.1-7.8]; 58.95	4	50.83	[4.0-4.2]; 51.09	_	59.2	12.1	8.38	False	Folded	None	9	0.153	4	0.125	0.129126	0.028	_	0.129027	0.125016
Q04637	Eukaryotic translation initiation factor 4 gamma 1 (eIF-4-gamma 1) (eIF-4G 1) (eIF-4G1) (p220)	psother526	1	1599	1599	_	Homo sapiens	_	33549703;30893049	730	757	28	6.8	153.43	[6.1-7.7]; 152.33	4	121.42	[4.0-4.2]; 122.53	_	153.23	7	32.01	False	Unfolded	None	9	-0.093	6.8	-0.143	-0.142472	0.05	_	-0.142953	-0.12902
Q04637	Eukaryotic translation initiation factor 4 gamma 1 (eIF-4-gamma 1) (eIF-4G 1) (eIF-4G1) (p220)	psother526	1	1599	1599	_	Homo sapiens	_	33549703;30893049	993	1238	246	7.3	115.29	[6.5-8.1]; 114.87	4	100.92	[4.0-4.5]; 101.39	_	115.16	10.5	14.37	False	Unfolded	None	9	-0.019	7.2	-0.048	-0.0477962	0.029	_	-0.04805	-0.0449994
Q05086	Ubiquitin-protein ligase E3A (EC 2.3.2.26) (E6AP ubiquitin-protein ligase) (HECT-type ubiquitin transferase E3A) (Human papillomavirus E6-associated protein) (Oncogenic protein-associated protein E6-AP) (Renal carcinoma antigen NY-REN-54)	psother357	1	875	875	_	Homo sapiens	Proteasome containing foci	32386541;32025036	178	203	26	7	136.75	[6.2-8.1]; 135.19	4	91.06	[4.0-4.2]; 92.4	_	136.75	4.3	45.69	True	F->U	4.55	4.2	0.075	7	-0.19	-0.189967	0.265	_	-0.189967	0.0566055
Q05086	Ubiquitin-protein ligase E3A (EC 2.3.2.26) (E6AP ubiquitin-protein ligase) (HECT-type ubiquitin transferase E3A) (Human papillomavirus E6-associated protein) (Oncogenic protein-associated protein E6-AP) (Renal carcinoma antigen NY-REN-54)	psother357	1	875	875	_	Homo sapiens	Proteasome containing foci	32386541;32025036	389	409	21	9	155.78	[7.8-9.0]; 151.55	4	50.62	[4.0-4.4]; 55.34	_	135.16	3.1	105.16	True	F->U	4.25	4	0.084	9	-0.575	-0.490318	0.659	_	-0.575144	0.0843383
Q05753	Ankyrin repeat domain-containing protein; chloroplastic (AKRP) (Protein EMBRYO DEFECTIVE 2036)	psother335	40	315	276	_	Arabidopsis thaliana	_	32298786;32169217	82	102	21	6.7	192.04	[6.1-7.4]; 190.95	4	160.97	[4.0-4.3]; 162.38	_	191.42	10.3	31.07	False	Unfolded	None	9	-0.277	4	-0.39	-0.370578	0.113	_	-0.373018	-0.389557
Q05753	Ankyrin repeat domain-containing protein; chloroplastic (AKRP) (Protein EMBRYO DEFECTIVE 2036)	psother335	40	315	276	_	Arabidopsis thaliana	_	32298786;32169217	174	197	24	9	115.1	[8.0-9.0]; 112.67	4	53.25	[4.0-4.4]; 55.87	_	98.97	3.4	61.85	True	F->U	5.15	4	0.139	9	-0.174	-0.116136	0.313	_	-0.17403	0.138518
Q05D60	Deuterosome assembly protein 1 (Coiled-coil domain-containing protein 67)	psother564	469	604	136	_	Homo sapiens	_	33658185	504	535	32	7.7	78.94	[6.6-8.9]; 78.08	4	51.23	[4.0-4.4]; 52.48	_	78.18	4.6	27.71	False	Folded	None	4.7	0.208	7.8	0.079	0.0837581	0.129	_	0.0788223	0.174465
Q06628	Autophagy-related protein 13	psother310	1	738	738	_	Saccharomyces cerevisiae	Pre-autophagosomal structure	32025038	273	369	97	6.1	92.72	[5.6-7.0]; 92.53	9	87.14	[9.0-9.0]; 87.14	_	92.23	10.5	5.58	False	Folded	None	9	0.047	4	0.007	0.0309552	0.04	_	0.0235162	0.0465164
Q06628	Autophagy-related protein 13	psother310	1	738	738	_	Saccharomyces cerevisiae	Pre-autophagosomal structure	32025038	372	470	99	6.1	67.83	[5.4-6.8]; 67.39	9	55.1	[8.9-9.0]; 55.49	_	65.93	9.8	12.73	False	Folded	None	9	0.179	4	0.092	0.13275	0.087	_	0.117396	0.179424
Q06628	Autophagy-related protein 13	psother310	1	738	738	_	Saccharomyces cerevisiae	Pre-autophagosomal structure	32025038	476	499	24	6.7	37.71	[5.9-7.7]; 37.37	4	27.81	[4.0-4.2]; 28.27	_	37.57	10.1	9.9	False	Folded	None	9	0.242	6.6	0.217	0.217881	0.025	_	0.217382	0.229651
Q06628	Autophagy-related protein 13	psother310	1	738	738	_	Saccharomyces cerevisiae	Pre-autophagosomal structure	32025038	511	646	136	8.1	89.23	[7.2-8.8]; 88.85	4	78.65	[4.0-4.3]; 78.99	_	87.87	7	10.58	False	Folded	None	6.4	0.09	4	0.061	0.0751568	0.029	_	0.0644311	0.0613656
Q06628	Autophagy-related protein 13	psother310	1	738	738	_	Saccharomyces cerevisiae	Pre-autophagosomal structure	32025038	663	718	56	5.6	71.41	[5.0-6.1]; 71.07	9	62.88	[8.9-9.0]; 63.14	_	68.07	9.4	8.53	False	Folded	None	9	0.176	4	0.057	0.141922	0.119	_	0.0850905	0.175923
Q06787	Synaptic functional regulator FMR1 (Fragile X mental retardation protein 1) (FMRP) (Protein FMR-1)	psother341	1	632	632	_	Homo sapiens	Stress granule	32302565;32302570	324	367	44	6.6	82.34	[6.0-7.3]; 81.67	4	64.63	[4.0-4.3]; 65.35	_	81.77	5.7	17.71	False	Folded	None	5.4	0.12	6.9	0.061	0.0613772	0.059	_	0.0640398	0.073529
Q06787	Synaptic functional regulator FMR1 (Fragile X mental retardation protein 1) (FMRP) (Protein FMR-1)	psother341	1	632	632	_	Homo sapiens	Stress granule	32302565;32302570	435	632	198	8	137.36	[7.0-8.6]; 136.73	4	117.6	[4.0-4.5]; 118.27	_	135.62	10.1	19.76	False	Unfolded	None	4.8	-0.091	7.9	-0.123	-0.118769	0.032	_	-0.122917	-0.114269
Q07352	mRNA decay activator protein ZFP36L1 (Butyrate response factor 1) (EGF-response factor 1) (ERF-1) (TPA-induced sequence 11b) (Zinc finger protein 36; C3H1 type-like 1) (ZFP36-like 1)	psother559	1	338	338	_	Homo sapiens	_	33650968	90	112	23	6.7	64.63	[6.1-7.4]; 64.18	4	52.73	[4.0-4.3]; 53.18	_	64.43	7	11.9	False	Folded	None	9	0.2	4	0.159	0.170831	0.041	_	0.169886	0.159174
Q07352	mRNA decay activator protein ZFP36L1 (Butyrate response factor 1) (EGF-response factor 1) (ERF-1) (TPA-induced sequence 11b) (Zinc finger protein 36; C3H1 type-like 1) (ZFP36-like 1)	psother559	1	338	338	_	Homo sapiens	_	33650968	273	325	53	9	78.8	[8.1-9.0]; 77.39	4	38.94	[4.0-4.4]; 40.86	_	67.54	4	39.86	False	Folded	None	4	0.259	9	0.021	0.0692192	0.238	_	0.0214118	0.258722
Q07457	E3 ubiquitin-protein ligase BRE1 (EC 2.3.2.27) (Brefeldin A-sensitivity protein 1) (RING-type E3 ubiquitin transferase BRE1)	psother324	1	700	700	_	Saccharomyces cerevisiae	_	32214243	122	142	21	9	116.32	[8.1-9.0]; 114.22	4	66.61	[4.0-4.4]; 68.82	_	102.99	3.5	49.71	True	F->U	4.85	4	0.109	9	-0.209	-0.156611	0.318	_	-0.208987	0.10871
Q07457	E3 ubiquitin-protein ligase BRE1 (EC 2.3.2.27) (Brefeldin A-sensitivity protein 1) (RING-type E3 ubiquitin transferase BRE1)	psother324	1	700	700	_	Saccharomyces cerevisiae	_	32214243	197	252	56	7.2	170.65	[6.3-8.4]; 168.77	4	116.9	[4.0-4.3]; 118.91	_	170.55	4.2	53.75	False	Unfolded	None	4.1	-0.02	7.1	-0.312	-0.312129	0.292	_	-0.312276	-0.0321013
Q07889	Son of sevenless homolog 1 (SOS-1)	psother153	1	1333	1333	_	Homo sapiens	Receptor cluster	30846600	1019	1333	315	5.5	57.77	[4.8-6.1]; 57.35	9	47.33	[8.9-9.0]; 47.67	_	54.01	10.1	10.44	False	Folded	None	9	0.222	4	0.143	0.194991	0.079	_	0.163758	0.222188
Q07889	Son of sevenless homolog 1 (SOS-1)	psother187	1117	1319	203	_	Homo sapiens	Receptor cluster	31268421	1117	1320	204	5.5	47.24	[4.9-6.1]; 46.87	9	37.48	[8.9-9.0]; 37.8	_	43.73	10.1	9.76	False	Folded	None	9	0.252	4	0.168	0.225966	0.084	_	0.189382	0.252497
Q07955	Serine/arginine-rich splicing factor 1 (Alternative-splicing factor 1) (ASF-1) (Splicing factor; arginine/serine-rich 1) (pre-mRNA-splicing factor SF2; P33 subunit)	psother396	1	248	248	_	Homo sapiens	Nuclear speckle	32824618;31391587	90	139	50	7.7	95.23	[6.8-8.3]; 94.9	4	85.26	[4.0-4.3]; 85.62	_	94.66	12.5	9.97	False	Unfolded	None	9	-0.031	7.6	-0.051	-0.0493479	0.02	_	-0.051143	-0.0392316
Q07955	Serine/arginine-rich splicing factor 1 (Alternative-splicing factor 1) (ASF-1) (Splicing factor; arginine/serine-rich 1) (pre-mRNA-splicing factor SF2; P33 subunit)	psother396	1	248	248	_	Homo sapiens	Nuclear speckle	32824618;31391587	173	248	76	6	183.43	[5.0-7.2]; 182.83	9	167.44	[9.0-9.0]; 167.44	_	182.31	12.7	15.99	False	Unfolded	None	9	-0.442	4	-0.528	-0.497007	0.086	_	-0.509624	-0.441711
Q08211	ATP-dependent RNA helicase A (EC 3.6.4.13) (DEAH box protein 9) (DExH-box helicase 9) (Leukophysin) (LKP) (Nuclear DNA helicase II) (NDH II) (RNA helicase A)	psother511	1151	1270	120	_	Homo sapiens	_	33522570	1151	1174	24	8	100.89	[7.1-8.6]; 100.32	4	84.92	[4.0-4.3]; 85.64	_	99.18	10.5	15.97	False	Unfolded	None	4.5	-0.047	8	-0.086	-0.0795618	0.039	_	-0.0855005	-0.0519519
Q08211	ATP-dependent RNA helicase A (EC 3.6.4.13) (DEAH box protein 9) (DExH-box helicase 9) (Leukophysin) (LKP) (Nuclear DNA helicase II) (NDH II) (RNA helicase A)	psother511	1151	1270	120	_	Homo sapiens	_	33522570	1225	1249	25	8.1	82.83	[7.5-8.6]; 82.49	4	71.71	[4.0-4.4]; 72.18	_	80.61	12	11.12	False	Non-confident transition	None	4.5	0.014	8.1	-0.017	-0.00906044	0.031	_	-0.0170826	0.0117474
Q08378	Golgin subfamily A member 3 (Golgi complex-associated protein of 170 kDa) (GCP170) (Golgin-160)	psother379	1	1498	1498	_	Homo sapiens	Golgin condensate	32668013	1	156	156	8.3	73.29	[7.0-9.0]; 72.45	4	40.69	[4.0-4.4]; 41.39	_	70.41	4.3	32.6	False	Folded	None	4.2	0.266	8.4	0.11	0.121303	0.156	_	0.110482	0.256344
Q08378	Golgin subfamily A member 3 (Golgi complex-associated protein of 170 kDa) (GCP170) (Golgin-160)	psother379	1	1498	1498	_	Homo sapiens	Golgin condensate	32668013	161	206	46	6.5	79.31	[5.8-7.2]; 78.79	9	65.57	[8.9-9.0]; 66.14	_	78.59	11.4	13.74	False	Folded	None	9	0.097	4	0.051	0.0544127	0.046	_	0.0532892	0.0967916
Q08378	Golgin subfamily A member 3 (Golgi complex-associated protein of 170 kDa) (GCP170) (Golgin-160)	psother379	1	1498	1498	_	Homo sapiens	Golgin condensate	32668013	219	354	136	8.1	89.16	[6.9-9.0]; 88.44	4	67.29	[4.0-4.5]; 68.08	_	87.56	4.8	21.87	False	Folded	None	4.7	0.142	8.1	0.061	0.0672834	0.081	_	0.0610682	0.126471
Q08378	Golgin subfamily A member 3 (Golgi complex-associated protein of 170 kDa) (GCP170) (Golgin-160)	psother379	1	1498	1498	_	Homo sapiens	Golgin condensate	32668013	363	385	23	9	113.48	[7.7-9.0]; 111.76	4	62.14	[4.0-4.4]; 64.57	_	103.7	3.8	51.34	True	F->U	5.15	4	0.152	9	-0.192	-0.147976	0.344	_	-0.19196	0.152317
Q08378	Golgin subfamily A member 3 (Golgi complex-associated protein of 170 kDa) (GCP170) (Golgin-160)	psother379	1	1498	1498	_	Homo sapiens	Golgin condensate	32668013	788	813	26	7.4	174.63	[6.5-8.7]; 172.44	4	109.57	[4.0-4.4]; 112.44	_	173.7	4.2	65.06	False	Non-confident transition	None	4.3	0.001	7.4	-0.354	-0.350494	0.355	_	-0.353621	-0.0348625
Q08378	Golgin subfamily A member 3 (Golgi complex-associated protein of 170 kDa) (GCP170) (Golgin-160)	psother379	1	1498	1498	_	Homo sapiens	Golgin condensate	32668013	881	941	61	7.3	125.82	[6.5-8.3]; 125.1	4	101.7	[4.0-4.4]; 102.81	_	125.61	6.3	24.12	False	Unfolded	None	5.9	-0.032	4	-0.099	-0.0918432	0.067	_	-0.0960778	-0.0990576
Q08378	Golgin subfamily A member 3 (Golgi complex-associated protein of 170 kDa) (GCP170) (Golgin-160)	psother379	1	1498	1498	_	Homo sapiens	Golgin condensate	32668013	958	999	42	5.9	138.18	[5.1-6.7]; 136.69	9	98.34	[8.9-9.0]; 99.36	_	131.13	10.1	39.84	False	Unfolded	None	9	-0.063	4	-0.264	-0.184167	0.201	_	-0.219861	-0.0629023
Q08378	Golgin subfamily A member 3 (Golgi complex-associated protein of 170 kDa) (GCP170) (Golgin-160)	psother379	1	1498	1498	_	Homo sapiens	Golgin condensate	32668013	1363	1498	136	6.4	72.86	[5.8-7.1]; 72.47	9	61.89	[8.9-9.0]; 62.32	_	72.08	8.8	10.97	False	Folded	None	9	0.189	4	0.109	0.149715	0.08	_	0.142579	0.18938
Q08379	Golgin subfamily A member 2 (130 kDa cis-Golgi matrix protein) (GM130) (GM130 autoantigen) (Golgin-95)	psother380	1	1002	1002	_	Homo sapiens	Golgin condensate	32668013	1	128	128	6.3	78.39	[5.7-7.0]; 77.95	9	65.83	[8.9-9.0]; 66.3	_	77.24	9.4	12.56	False	Folded	None	9	0.144	4	0.073	0.0978992	0.071	_	0.0896949	0.144456
Q08379	Golgin subfamily A member 2 (130 kDa cis-Golgi matrix protein) (GM130) (GM130 autoantigen) (Golgin-95)	psother380	1	1002	1002	_	Homo sapiens	Golgin condensate	32668013	236	257	22	7.4	132	[6.4-8.5]; 131.34	4	108.98	[4.0-4.3]; 110.05	_	131.78	6.6	23.02	False	Unfolded	None	6	-0.073	4	-0.141	-0.120722	0.068	_	-0.126296	-0.140861
Q08379	Golgin subfamily A member 2 (130 kDa cis-Golgi matrix protein) (GM130) (GM130 autoantigen) (Golgin-95)	psother380	1	1002	1002	_	Homo sapiens	Golgin condensate	32668013	358	502	145	7.6	110.18	[6.6-8.9]; 109.04	4.1	72	[4.0-4.5]; 72.42	_	109.2	4.3	38.18	True	F->U	5.75	4.4	0.149	7.6	-0.058	-0.0534216	0.207	_	-0.0578636	0.126512
Q08379	Golgin subfamily A member 2 (130 kDa cis-Golgi matrix protein) (GM130) (GM130 autoantigen) (Golgin-95)	psother380	1	1002	1002	_	Homo sapiens	Golgin condensate	32668013	520	541	22	8.1	109.52	[7.3-8.8]; 108.78	4	88.02	[4.0-4.4]; 88.9	_	106.5	12.5	21.5	False	Unfolded	None	4.8	-0.021	8.1	-0.072	-0.0608073	0.051	_	-0.0719246	-0.0343972
Q08379	Golgin subfamily A member 2 (130 kDa cis-Golgi matrix protein) (GM130) (GM130 autoantigen) (Golgin-95)	psother380	1	1002	1002	_	Homo sapiens	Golgin condensate	32668013	653	734	82	8.5	132.05	[6.9-9.0]; 130.26	4	61.06	[4.0-4.3]; 64.21	_	126.16	3.6	70.99	True	F->U	4.65	4	0.144	8.6	-0.29	-0.264923	0.434	_	-0.290217	0.143837
Q08379	Golgin subfamily A member 2 (130 kDa cis-Golgi matrix protein) (GM130) (GM130 autoantigen) (Golgin-95)	psother380	1	1002	1002	_	Homo sapiens	Golgin condensate	32668013	774	801	28	7.5	73.51	[6.5-8.8]; 72.81	4	51.07	[4.0-4.3]; 51.88	_	73.14	4.6	22.44	False	Folded	None	4.6	0.225	7.8	0.089	0.093312	0.136	_	0.0893951	0.198804
Q08379	Golgin subfamily A member 2 (130 kDa cis-Golgi matrix protein) (GM130) (GM130 autoantigen) (Golgin-95)	psother380	1	1002	1002	_	Homo sapiens	Golgin condensate	32668013	903	931	29	9	33.43	[7.8-9.0]; 32.32	4	5.99	[4.0-4.4]; 7.22	_	28	1.8	27.44	False	Folded	None	4	0.35	9	0.197	0.217289	0.153	_	0.197036	0.350254
Q08379	Golgin subfamily A member 2 (130 kDa cis-Golgi matrix protein) (GM130) (GM130 autoantigen) (Golgin-95)	psother380	1	1002	1002	_	Homo sapiens	Golgin condensate	32668013	935	986	52	8.1	72.24	[7.0-9.0]; 71.46	4	44.36	[4.0-4.5]; 45.41	_	69.92	4.5	27.88	False	Folded	None	4.6	0.221	8.2	0.094	0.103859	0.127	_	0.0940901	0.196802
Q08421	Enhancer of translation termination 1	psother167	1	412	412	_	Saccharomyces cerevisiae	Nucleolus	30963611;26359986	1	44	44	6.2	146.25	[5.6-6.9]; 145.23	9	113.45	[8.9-9.0]; 114.46	_	142.68	10.5	32.8	False	Unfolded	None	9	-0.132	4	-0.282	-0.246771	0.15	_	-0.260678	-0.131584
Q08831	RNA-binding protein VTS1 (VTI1-2 suppressor protein 1)	psself174	1	523	523	_	Saccharomyces cerevisiae	_	31757755	1	110	110	6.1	53.31	[5.6-6.8]; 53.19	4	50.2	[4.0-4.2]; 50.31	_	52.92	8.8	3.11	False	Folded	None	9	0.222	4	0.187	0.21429	0.035	_	0.204871	0.186984
Q08831	RNA-binding protein VTS1 (VTI1-2 suppressor protein 1)	psself174	1	523	523	_	Saccharomyces cerevisiae	_	31757755	152	188	37	6.7	48.5	[5.9-7.6]; 48.39	4	45.31	[4.0-4.2]; 45.45	_	48.45	11.4	3.19	False	Folded	None	9	0.196	6.4	0.184	0.184339	0.012	_	0.183987	0.1871
Q08831	RNA-binding protein VTS1 (VTI1-2 suppressor protein 1)	psself174	1	523	523	_	Saccharomyces cerevisiae	_	31757755	296	448	153	5	79.77	[4.0-5.7]; 79.4	9	59.7	[8.7-9.0]; 60.56	_	69.65	9.8	20.07	False	Folded	None	9	0.17	4	0.028	0.126848	0.142	_	0.0425386	0.170128
Q09472	Histone acetyltransferase p300 (p300 HAT) (EC 2.3.1.48) (E1A-associated protein p300) (Histone butyryltransferase p300) (EC 2.3.1.-) (Histone crotonyltransferase p300) (EC 2.3.1.-) (Protein 2-hydroxyisobutyryltransferase p300) (EC 2.3.1.-) (Protein lactyltransferas p300) (EC 2.3.1.-) (Protein propionyltransferase p300) (EC 2.3.1.-)	psother549	1	2414	2414	_	Homo sapiens	Transcriptional condensate	33606996	1	26	26	6.3	50.53	[5.7-6.9]; 50.05	9	34.61	[8.9-9.0]; 35.06	_	48.89	10.1	15.92	False	Folded	None	9	0.26	4	0.18	0.205324	0.08	_	0.19802	0.260014
Q09472	Histone acetyltransferase p300 (p300 HAT) (EC 2.3.1.48) (E1A-associated protein p300) (Histone butyryltransferase p300) (EC 2.3.1.-) (Histone crotonyltransferase p300) (EC 2.3.1.-) (Protein 2-hydroxyisobutyryltransferase p300) (EC 2.3.1.-) (Protein lactyltransferas p300) (EC 2.3.1.-) (Protein propionyltransferase p300) (EC 2.3.1.-)	psother549	1	2414	2414	_	Homo sapiens	Transcriptional condensate	33606996	44	273	230	6.7	28.63	[6.0-7.3]; 28.56	9	26.44	[9.0-9.0]; 26.44	_	28.58	9.2	2.19	False	Folded	None	9	0.312	4	0.297	0.302666	0.015	_	0.302109	0.311766
Q09472	Histone acetyltransferase p300 (p300 HAT) (EC 2.3.1.48) (E1A-associated protein p300) (Histone butyryltransferase p300) (EC 2.3.1.-) (Histone crotonyltransferase p300) (EC 2.3.1.-) (Protein 2-hydroxyisobutyryltransferase p300) (EC 2.3.1.-) (Protein lactyltransferas p300) (EC 2.3.1.-) (Protein propionyltransferase p300) (EC 2.3.1.-)	psother549	1	2414	2414	_	Homo sapiens	Transcriptional condensate	33606996	281	335	55	6.1	33.31	[5.6-6.8]; 33.09	9	26.7	[8.9-9.0]; 26.92	_	32.35	9.6	6.61	False	Folded	None	9	0.322	4	0.273	0.300301	0.049	_	0.290218	0.321681
Q09472	Histone acetyltransferase p300 (p300 HAT) (EC 2.3.1.48) (E1A-associated protein p300) (Histone butyryltransferase p300) (EC 2.3.1.-) (Histone crotonyltransferase p300) (EC 2.3.1.-) (Protein 2-hydroxyisobutyryltransferase p300) (EC 2.3.1.-) (Protein lactyltransferas p300) (EC 2.3.1.-) (Protein propionyltransferase p300) (EC 2.3.1.-)	psother549	1	2414	2414	_	Homo sapiens	Transcriptional condensate	33606996	424	460	37	8.8	23.04	[7.9-9.0]; 22.85	4	16.37	[4.0-4.5]; 16.66	_	21.04	7	6.67	False	Folded	None	4.6	0.351	8.8	0.333	0.339879	0.018	_	0.332759	0.348803
Q09472	Histone acetyltransferase p300 (p300 HAT) (EC 2.3.1.48) (E1A-associated protein p300) (Histone butyryltransferase p300) (EC 2.3.1.-) (Histone crotonyltransferase p300) (EC 2.3.1.-) (Protein 2-hydroxyisobutyryltransferase p300) (EC 2.3.1.-) (Protein lactyltransferas p300) (EC 2.3.1.-) (Protein propionyltransferase p300) (EC 2.3.1.-)	psother549	1	2414	2414	_	Homo sapiens	Transcriptional condensate	33606996	479	580	102	8	42.36	[6.6-8.7]; 42.17	4	37.16	[4.0-4.3]; 37.37	_	42.07	8.8	5.2	False	Folded	None	9	0.269	4	0.247	0.264438	0.022	_	0.265445	0.246991
Q09472	Histone acetyltransferase p300 (p300 HAT) (EC 2.3.1.48) (E1A-associated protein p300) (Histone butyryltransferase p300) (EC 2.3.1.-) (Histone crotonyltransferase p300) (EC 2.3.1.-) (Protein 2-hydroxyisobutyryltransferase p300) (EC 2.3.1.-) (Protein lactyltransferas p300) (EC 2.3.1.-) (Protein propionyltransferase p300) (EC 2.3.1.-)	psother549	1	2414	2414	_	Homo sapiens	Transcriptional condensate	33606996	643	1051	409	7.1	37.41	[6.7-7.6]; 37.28	5	33.36	[4.6-9.0]; 33.53	_	37.4	6.1	4.05	False	Folded	None	5.2	0.292	4	0.274	0.275695	0.018	_	0.275447	0.291374
Q09472	Histone acetyltransferase p300 (p300 HAT) (EC 2.3.1.48) (E1A-associated protein p300) (Histone butyryltransferase p300) (EC 2.3.1.-) (Histone crotonyltransferase p300) (EC 2.3.1.-) (Protein 2-hydroxyisobutyryltransferase p300) (EC 2.3.1.-) (Protein lactyltransferas p300) (EC 2.3.1.-) (Protein propionyltransferase p300) (EC 2.3.1.-)	psother549	1	2414	2414	_	Homo sapiens	Transcriptional condensate	33606996	1519	1584	66	6.2	164.98	[5.5-6.8]; 163.81	9	127.37	[8.9-9.0]; 128.38	_	159.89	9.7	37.61	False	Unfolded	None	9	-0.102	4	-0.308	-0.238062	0.206	_	-0.264427	-0.101811
Q09472	Histone acetyltransferase p300 (p300 HAT) (EC 2.3.1.48) (E1A-associated protein p300) (Histone butyryltransferase p300) (EC 2.3.1.-) (Histone crotonyltransferase p300) (EC 2.3.1.-) (Protein 2-hydroxyisobutyryltransferase p300) (EC 2.3.1.-) (Protein lactyltransferas p300) (EC 2.3.1.-) (Protein propionyltransferase p300) (EC 2.3.1.-)	psother549	1	2414	2414	_	Homo sapiens	Transcriptional condensate	33606996	1817	2074	258	4	28.29	[4.0-5.5]; 28.03	9	21.44	[8.9-9.0]; 21.62	_	25.14	12.9	6.85	False	Folded	None	9	0.312	4	0.272	0.297296	0.04	_	0.271877	0.311822
Q09472	Histone acetyltransferase p300 (p300 HAT) (EC 2.3.1.48) (E1A-associated protein p300) (Histone butyryltransferase p300) (EC 2.3.1.-) (Histone crotonyltransferase p300) (EC 2.3.1.-) (Protein 2-hydroxyisobutyryltransferase p300) (EC 2.3.1.-) (Protein lactyltransferas p300) (EC 2.3.1.-) (Protein propionyltransferase p300) (EC 2.3.1.-)	psother549	1	2414	2414	_	Homo sapiens	Transcriptional condensate	33606996	2084	2414	331	4	47.27	[4.0-5.3]; 47.06	9	40.02	[7.5-9.0]; 40.59	_	41.07	10.5	7.25	False	Folded	None	9	0.263	4	0.216	0.25892	0.047	_	0.216208	0.263354
Q12092	Autophagy-related protein 29	psother311	1	213	213	_	Saccharomyces cerevisiae	Pre-autophagosomal structure	32025038	122	146	25	8.8	117.77	[7.1-9.0]; 115.97	4	55.15	[4.0-4.4]; 58.11	_	110.86	3.3	62.62	True	F->U	4.65	4	0.137	8.8	-0.256	-0.22948	0.393	_	-0.255589	0.137259
Q12092	Autophagy-related protein 29	psother311	1	213	213	_	Saccharomyces cerevisiae	Pre-autophagosomal structure	32025038	159	200	42	7.1	130.59	[6.1-8.3]; 129.51	4	97.79	[4.0-4.2]; 98.83	_	130.59	4.6	32.8	True	F->U	4.85	4.4	0.045	7.5	-0.133	-0.13085	0.178	_	-0.131797	0.0242821
Q12158	Sister chromatid cohesion protein 1	psother536	1	566	566	_	Saccharomyces cerevisiae	_	33568486	204	237	34	8.8	97.1	[7.5-9.0]; 95.39	4	42.01	[4.0-4.3]; 44.18	_	87.73	4	55.09	True	F->U	5.75	4	0.22	8.8	-0.11	-0.0749281	0.33	_	-0.109722	0.220105
Q12158	Sister chromatid cohesion protein 1	psother536	1	566	566	_	Saccharomyces cerevisiae	_	33568486	240	365	126	8.4	97.84	[6.9-9.0]; 96.6	4	49.68	[4.0-4.2]; 51.48	_	94	4	48.16	True	F->U	6.15	4	0.213	8.4	-0.044	-0.0292981	0.257	_	-0.0444111	0.213102
Q12158	Sister chromatid cohesion protein 1	psother536	1	566	566	_	Saccharomyces cerevisiae	_	33568486	453	477	25	7	98.56	[6.3-8.0]; 97.55	4	69.56	[4.0-4.3]; 70.65	_	98.56	4.6	29	False	Folded	None	4.7	0.128	7.1	0.008	0.00776959	0.12	_	0.00776959	0.0869575
Q12329	Heat shock protein 42 (42 kDa heat shock protein)	psother36	1	375	375	_	Saccharomyces cerevisiae	Stress granule	26238190	14	62	49	4	103.92	[4.0-5.2]; 103.25	9	82.4	[8.7-9.0]; 83.35	_	89.14	11.8	21.52	False	Unfolded	None	9	-0.006	4	-0.216	-0.0435173	0.21	_	-0.215708	-0.00617345
Q12329	Heat shock protein 42 (42 kDa heat shock protein)	psother36	1	375	375	_	Saccharomyces cerevisiae	Stress granule	26238190	80	238	159	7.9	119.76	[6.6-9.0]; 118.54	4.1	68.55	[4.0-4.3]; 70.31	_	118.04	4	51.21	True	F->U	5.15	4.1	0.155	7.9	-0.117	-0.110333	0.272	_	-0.116973	0.155276
Q12421	Autophagy-related protein 31 (CIK1 suppressor protein 1) (Protein CIS1)	psother312	1	196	196	_	Saccharomyces cerevisiae	Pre-autophagosomal structure	32025038	18	45	28	8	121.57	[6.6-9.0]; 120.64	4	86.7	[4.0-4.2]; 87.97	_	120.19	3.9	34.87	True	F->U	4.55	4	0.071	8.2	-0.151	-0.143572	0.222	_	-0.150837	0.0711916
Q12421	Autophagy-related protein 31 (CIK1 suppressor protein 1) (Protein CIS1)	psother312	1	196	196	_	Saccharomyces cerevisiae	Pre-autophagosomal structure	32025038	120	146	27	9	182.52	[7.5-9.0]; 179.74	4	97.89	[4.0-4.3]; 101.06	_	168.92	3.6	84.63	False	Unfolded	None	4	-0.02	9	-0.549	-0.494351	0.529	_	-0.549421	-0.0196207
Q12517	mRNA-decapping enzyme subunit 1	psother370	1	231	231	_	Saccharomyces cerevisiae	_	32513655	97	118	22	8.8	106.12	[7.9-9.0]; 105.7	4	91.59	[4.0-4.5]; 92.28	_	101.82	7	14.53	False	Folded	None	4.5	0.071	8.8	0.029	0.0446963	0.042	_	0.029018	0.0686687
Q12888	TP53-binding protein 1 (53BP1) (p53-binding protein 1) (p53BP1)	psother283	1	1972	1972	_	Homo sapiens	_	31570834	1	511	511	8.3	93.72	[6.6-9.0]; 92.52	4	41.21	[4.0-4.1]; 42.92	_	91.16	3.9	52.51	False	Folded	None	4	0.259	8.4	0.024	0.0353029	0.235	_	0.0244191	0.259287
Q12888	TP53-binding protein 1 (53BP1) (p53-binding protein 1) (p53BP1)	psother283	1	1972	1972	_	Homo sapiens	_	31570834	515	605	91	8.8	98.54	[7.4-9.0]; 96.75	4	43.95	[4.0-4.3]; 46.57	_	90.2	3.8	54.59	True	F->U	5.95	4	0.213	8.9	-0.084	-0.0494368	0.297	_	-0.0835363	0.213342
Q12888	TP53-binding protein 1 (53BP1) (p53-binding protein 1) (p53BP1)	psother283	1	1972	1972	_	Homo sapiens	_	31570834	615	692	78	8.4	100.41	[6.7-9.0]; 99.16	4	44.42	[4.0-4.3]; 47.06	_	97.19	3.7	55.99	True	F->U	5.25	4	0.217	8.3	-0.152	-0.137821	0.369	_	-0.151754	0.21716
Q12888	TP53-binding protein 1 (53BP1) (p53-binding protein 1) (p53BP1)	psother283	1	1972	1972	_	Homo sapiens	_	31570834	709	764	56	7.4	97.7	[6.4-9.0]; 96.0	4	44.62	[4.0-4.2]; 46.4	_	96.99	3.8	53.08	True	F->U	5.35	4	0.235	7.6	-0.118	-0.113442	0.353	_	-0.117945	0.234745
Q12888	TP53-binding protein 1 (53BP1) (p53-binding protein 1) (p53BP1)	psother283	1	1972	1972	_	Homo sapiens	_	31570834	781	904	124	8	103.43	[6.6-9.0]; 102.34	4	56.49	[4.0-4.2]; 58.32	_	101.59	3.9	46.94	True	F->U	5.55	4	0.188	7.9	-0.072	-0.0664509	0.26	_	-0.0722507	0.188422
Q12888	TP53-binding protein 1 (53BP1) (p53-binding protein 1) (p53BP1)	psother283	1	1972	1972	_	Homo sapiens	_	31570834	906	934	29	6.2	-5.93	[5.6-6.8]; -6.41	9	-20.29	[8.9-9.0]; -19.92	_	-8.02	7.9	14.36	False	Folded	None	9	0.49	4	0.383	0.44103	0.107	_	0.421087	0.489672
Q12888	TP53-binding protein 1 (53BP1) (p53-binding protein 1) (p53BP1)	psother283	1	1972	1972	_	Homo sapiens	_	31570834	936	981	46	9	57	[7.8-9.0]; 55.5	4	19.48	[4.0-4.3]; 21.0	_	49.13	3.8	37.52	False	Folded	None	4	0.315	9	0.067	0.101158	0.248	_	0.0668878	0.314555
Q12888	TP53-binding protein 1 (53BP1) (p53-binding protein 1) (p53BP1)	psother283	1	1972	1972	_	Homo sapiens	_	31570834	996	1029	34	7	86.38	[6.3-7.9]; 85.38	4	57.73	[4.0-4.3]; 58.59	_	86.38	4.1	28.65	False	Folded	None	4.2	0.187	6.9	0.014	0.0137453	0.173	_	0.0137453	0.172495
Q12888	TP53-binding protein 1 (53BP1) (p53-binding protein 1) (p53BP1)	psother283	1	1972	1972	_	Homo sapiens	_	31570834	1034	1167	134	7.1	79.32	[6.4-8.2]; 78.55	4	56.36	[4.0-4.7]; 57.18	_	79.26	4.6	22.96	False	Folded	None	4.7	0.188	7.2	0.085	0.0857588	0.103	_	0.0854175	0.156515
Q12888	TP53-binding protein 1 (53BP1) (p53-binding protein 1) (p53BP1)	psother283	1	1972	1972	_	Homo sapiens	_	31570834	1170	1243	74	8.2	91	[6.9-9.0]; 90.28	4	64.89	[4.0-4.4]; 65.86	_	89.02	5	26.11	False	Folded	None	4.9	0.155	8.4	0.003	0.0181566	0.152	_	0.00303343	0.124473
Q12888	TP53-binding protein 1 (53BP1) (p53-binding protein 1) (p53BP1)	psother283	1	1972	1972	_	Homo sapiens	_	31570834	1261	1481	221	8.1	84.72	[7.0-8.9]; 84.01	4.2	64.42	[4.0-4.8]; 64.86	_	82.77	5.2	20.3	False	Folded	None	4.9	0.161	8.1	0.094	0.101954	0.067	_	0.0944377	0.147251
Q12888	TP53-binding protein 1 (53BP1) (p53-binding protein 1) (p53BP1)	psother283	1	1972	1972	_	Homo sapiens	_	31570834	1625	1660	36	5.5	124.82	[4.0-6.5]; 124.07	9	98.8	[8.9-9.0]; 99.59	_	119.42	13.1	26.02	False	Unfolded	None	9	-0.099	4	-0.197	-0.167511	0.098	_	-0.186033	-0.0991108
Q12888	TP53-binding protein 1 (53BP1) (p53-binding protein 1) (p53BP1)	psother283	1	1972	1972	_	Homo sapiens	_	31570834	1662	1721	60	6.7	96.47	[6.1-7.3]; 95.86	4	78.61	[4.0-4.3]; 79.2	_	96.11	8.8	17.86	False	Folded	None	9	0.118	4	0.039	0.0607615	0.079	_	0.0586665	0.0394148
Q12888	TP53-binding protein 1 (53BP1) (p53-binding protein 1) (p53BP1)	psother283	1	1972	1972	_	Homo sapiens	_	31570834	1745	1769	25	7.9	96.16	[6.7-9.0]; 94.94	4	39.34	[4.0-4.3]; 41.59	_	93.9	3.7	56.82	True	F->U	5.45	4	0.252	7.9	-0.108	-0.0993366	0.36	_	-0.10776	0.251932
Q13094	Lymphocyte cytosolic protein 2 (SH2 domain-containing leukocyte protein of 76 kDa) (SLP-76 tyrosine phosphoprotein) (SLP76)	psother188	101	420	320	_	Homo sapiens	Receptor cluster	31268421	101	421	321	8	71.7	[6.8-9.0]; 70.85	4.6	43.77	[4.0-4.8]; 44.46	_	69.95	4.8	27.93	False	Folded	None	4.7	0.249	8.1	0.127	0.135125	0.122	_	0.127327	0.247267
Q13136	Liprin-alpha-1 (LAR-interacting protein 1) (LIP-1) (Protein tyrosine phosphatase receptor type f polypeptide-interacting protein alpha-1) (PTPRF-interacting protein alpha-1)	psother264	1	1202	1202	_	Homo sapiens	Receptor cluster	31537859	1	40	40	9	53.4	[7.8-9.0]; 51.82	4	16.2	[4.0-4.3]; 17.57	_	46	3.7	37.2	False	Folded	None	4	0.316	9	0.071	0.101218	0.245	_	0.0711875	0.316481
Q13136	Liprin-alpha-1 (LAR-interacting protein 1) (LIP-1) (Protein tyrosine phosphatase receptor type f polypeptide-interacting protein alpha-1) (PTPRF-interacting protein alpha-1)	psother264	1	1202	1202	_	Homo sapiens	Receptor cluster	31537859	47	84	38	8.3	126.91	[7.2-9.0]; 125.87	4	93.99	[4.0-4.4]; 95.5	_	123	6.6	32.92	False	Unfolded	None	5	-0.001	8.2	-0.066	-0.0505922	0.065	_	-0.0656354	-0.0367414
Q13136	Liprin-alpha-1 (LAR-interacting protein 1) (LIP-1) (Protein tyrosine phosphatase receptor type f polypeptide-interacting protein alpha-1) (PTPRF-interacting protein alpha-1)	psother264	1	1202	1202	_	Homo sapiens	Receptor cluster	31537859	216	247	32	8.8	129.21	[7.5-9.0]; 127.87	4	83.16	[4.0-4.3]; 84.76	_	122.1	4.2	46.05	True	F->U	4.85	4.1	0.104	8.8	-0.199	-0.170025	0.303	_	-0.198725	0.09649
Q13136	Liprin-alpha-1 (LAR-interacting protein 1) (LIP-1) (Protein tyrosine phosphatase receptor type f polypeptide-interacting protein alpha-1) (PTPRF-interacting protein alpha-1)	psother264	1	1202	1202	_	Homo sapiens	Receptor cluster	31537859	261	331	71	7.2	136.73	[6.4-8.2]; 135.63	4	101.72	[4.0-4.4]; 103.13	_	136.59	4.8	35.01	False	Non-confident transition	None	4.9	0.007	7.4	-0.126	-0.123696	0.133	_	-0.125251	-0.0400166
Q13136	Liprin-alpha-1 (LAR-interacting protein 1) (LIP-1) (Protein tyrosine phosphatase receptor type f polypeptide-interacting protein alpha-1) (PTPRF-interacting protein alpha-1)	psother264	1	1202	1202	_	Homo sapiens	Receptor cluster	31537859	333	391	59	7.2	133.23	[6.4-8.3]; 132.23	4	101.26	[4.0-4.4]; 102.72	_	133.07	5.2	31.97	False	Unfolded	None	5	-0.023	7.4	-0.138	-0.135727	0.115	_	-0.137294	-0.0694635
Q13136	Liprin-alpha-1 (LAR-interacting protein 1) (LIP-1) (Protein tyrosine phosphatase receptor type f polypeptide-interacting protein alpha-1) (PTPRF-interacting protein alpha-1)	psother264	1	1202	1202	_	Homo sapiens	Receptor cluster	31537859	393	455	63	7	147.13	[6.3-7.8]; 146.17	4	119.17	[4.0-4.4]; 120.43	_	147.13	7	27.96	False	Unfolded	None	5.1	-0.112	4	-0.168	-0.156523	0.056	_	-0.156523	-0.167694
Q13136	Liprin-alpha-1 (LAR-interacting protein 1) (LIP-1) (Protein tyrosine phosphatase receptor type f polypeptide-interacting protein alpha-1) (PTPRF-interacting protein alpha-1)	psother264	1	1202	1202	_	Homo sapiens	Receptor cluster	31537859	475	504	30	6.9	120.44	[6.1-7.8]; 119.39	4	90.64	[4.0-4.3]; 92.02	_	120.35	4.8	29.8	True	F->U	5.15	4.8	0.043	7.1	-0.095	-0.0949422	0.138	_	-0.0943667	0.00161965
Q13136	Liprin-alpha-1 (LAR-interacting protein 1) (LIP-1) (Protein tyrosine phosphatase receptor type f polypeptide-interacting protein alpha-1) (PTPRF-interacting protein alpha-1)	psother264	1	1202	1202	_	Homo sapiens	Receptor cluster	31537859	557	579	23	7.8	110.72	[6.6-8.8]; 109.55	4	73	[4.0-4.3]; 74.44	_	109.37	4.6	37.72	True	F->U	5.95	4.6	0.112	7.5	-0.031	-0.0288915	0.143	_	-0.0303821	0.0776877
Q13136	Liprin-alpha-1 (LAR-interacting protein 1) (LIP-1) (Protein tyrosine phosphatase receptor type f polypeptide-interacting protein alpha-1) (PTPRF-interacting protein alpha-1)	psother264	1	1202	1202	_	Homo sapiens	Receptor cluster	31537859	595	619	25	9	154.4	[8.2-9.0]; 149.77	4	36.18	[4.0-4.4]; 40.98	_	117.58	3.1	118.22	True	F->U	4.45	4	0.102	9	-0.458	-0.326387	0.56	_	-0.458028	0.101509
Q13136	Liprin-alpha-1 (LAR-interacting protein 1) (LIP-1) (Protein tyrosine phosphatase receptor type f polypeptide-interacting protein alpha-1) (PTPRF-interacting protein alpha-1)	psother264	1	1202	1202	_	Homo sapiens	Receptor cluster	31537859	641	865	225	6.3	105.69	[5.7-7.1]; 105.22	9	92.54	[8.9-9.0]; 93.1	_	104.71	9.8	13.15	True	U->F	6.45	9	0.049	4	-0.027	0.00589835	0.076	_	-0.000829977	0.0493528
Q13136	Liprin-alpha-1 (LAR-interacting protein 1) (LIP-1) (Protein tyrosine phosphatase receptor type f polypeptide-interacting protein alpha-1) (PTPRF-interacting protein alpha-1)	psother264	1	1202	1202	_	Homo sapiens	Receptor cluster	31537859	1163	1191	29	5.8	76.01	[4.8-6.6]; 75.54	9	62.95	[8.9-9.0]; 63.39	_	73.58	12.5	13.06	False	Folded	None	9	0.085	5.7	0.035	0.0438372	0.05	_	0.0345939	0.0845402
Q13148	TAR DNA-binding protein 43 (TDP-43)	psother570	1	414	414	pH 6.1	Homo sapiens	Nucleolus	33709256;27452472	259	305	47	6.4	82.36	[5.6-7.1]; 82.11	9	75.1	[8.9-9.0]; 75.43	10% maximum solubility	81.91	12.5	7.26	False	Folded	None	9	0.107	4	0.05	0.0819478	0.057	Folded	0.0765697	0.106869
Q13148	TAR DNA-binding protein 43 (TDP-43)	psother570	1	414	414	pH 6.1	Homo sapiens	Nucleolus	33709256;27452472	336	374	39	7.8	62.16	[6.7-8.7]; 62.0	4	57.43	[4.0-4.5]; 57.64	Middle	61.95	7	4.73	False	Folded	None	5	0.177	7.7	0.167	0.167572	0.01	Folded	0.16679	0.171189
Q13148	TAR DNA-binding protein 43 (TDP-43)	psself188	263	414	152	pH 6.1	Homo sapiens	_	32003979	263	307	45	5.7	81.68	[4.6-6.6]; 81.37	9	73.69	[8.9-9.0]; 74.02	10% maximum solubility	80.28	12.9	7.99	False	Folded	None	9	0.095	4	0.039	0.0703302	0.056	Folded	0.0539594	0.0952892
Q13148	TAR DNA-binding protein 43 (TDP-43)	psself188	311	360	50	pH 6.1	Homo sapiens	_	32003979	339	361	23	6	79.12	[4.0-7.7]; 79.1	9	77.79	[9.0-9.0]; 77.79	10% maximum solubility	79.1	14.5	1.33	False	Folded	None	9	0.074	4	0.068	0.0677811	0.006	Folded	0.0676872	0.0738864
Q13148	TAR DNA-binding protein 43 (TDP-43)	psself343	351	383	33	pH 6.1	Homo sapiens	_	33709256;20055380	351	384	34	7.7	67.15	[6.7-8.7]; 66.96	4	61.66	[4.0-4.4]; 61.86	Middle	66.91	7	5.49	False	Folded	None	5	0.172	7.7	0.16	0.16088	0.012	Folded	0.159986	0.164137
Q13148	TAR DNA-binding protein 43 (TDP-43)	psself345	318	367	50	pH 6.1	Homo sapiens	_	33709256;23689371	334	368	35	7.8	48.2	[6.7-8.7]; 48.02	4	42.89	[4.0-4.5]; 43.13	Middle	47.97	7	5.31	False	Folded	None	5	0.222	7.7	0.212	0.212484	0.01	Folded	0.211728	0.213733
Q13151	Heterogeneous nuclear ribonucleoprotein A0 (hnRNP A0)	psself110	1	305	305	_	Homo sapiens	_	29961577	174	212	39	6.9	129.35	[6.2-7.7]; 129.06	4	119.07	[4.0-4.2]; 119.42	_	129.34	12.2	10.28	False	Unfolded	None	9	-0.164	7.2	-0.193	-0.193081	0.029	_	-0.192884	-0.187755
Q13151	Heterogeneous nuclear ribonucleoprotein A0 (hnRNP A0)	psself110	1	305	305	_	Homo sapiens	_	29961577	259	289	31	4	81.41	[4.0-5.5]; 81.01	9	66.79	[8.7-9.0]; 67.48	_	74.38	11.4	14.62	False	Folded	None	9	0.118	4	0.036	0.0865641	0.082	_	0.035741	0.118436
Q13185	Chromobox protein homolog 3 (HECH) (Heterochromatin protein 1 homolog gamma) (HP1 gamma) (Modifier 2 protein)	psother272	1	183	183	_	Homo sapiens	_	31543422	1	27	27	5.7	135.19	[4.3-6.5]; 132.75	9	75.71	[8.8-9.0]; 78.06	_	121.18	10.2	59.48	False	Non-confident transition	None	9	0.01	4	-0.257	-0.163229	0.267	_	-0.218345	0.0104793
Q13185	Chromobox protein homolog 3 (HECH) (Heterochromatin protein 1 homolog gamma) (HP1 gamma) (Modifier 2 protein)	psother272	1	183	183	_	Homo sapiens	_	31543422	83	116	34	6.3	199.56	[5.7-7.0]; 198.44	9	168.65	[8.9-9.0]; 169.79	_	196.65	9.8	30.91	False	Unfolded	None	9	-0.314	6.3	-0.432	-0.421085	0.118	_	-0.432255	-0.313889
Q13263	Transcription intermediary factor 1-beta (TIF1-beta) (E3 SUMO-protein ligase TRIM28) (EC 2.3.2.27) (KRAB-associated protein 1) (KAP-1) (KRAB-interacting protein 1) (KRIP-1) (Nuclear corepressor KAP-1) (RING finger protein 96) (RING-type E3 ubiquitin transferase TIF1-beta) (Tripartite motif-containing protein 28)	psother273	1	501	501	_	Homo sapiens	_	31543422	12	48	37	6.7	59.16	[6.1-7.3]; 58.93	4	52.29	[4.0-4.3]; 52.53	_	59.03	7	6.87	False	Folded	None	9	0.204	4	0.179	0.183209	0.025	_	0.182562	0.179306
Q13263	Transcription intermediary factor 1-beta (TIF1-beta) (E3 SUMO-protein ligase TRIM28) (EC 2.3.2.27) (KRAB-associated protein 1) (KAP-1) (KRAB-interacting protein 1) (KRIP-1) (Nuclear corepressor KAP-1) (RING finger protein 96) (RING-type E3 ubiquitin transferase TIF1-beta) (Tripartite motif-containing protein 28)	psother273	1	501	501	_	Homo sapiens	_	31543422	408	486	79	7.1	64.7	[6.4-8.1]; 64.29	4	52.2	[4.0-4.4]; 52.72	_	64.68	7	12.5	False	Folded	None	9	0.193	4	0.165	0.176253	0.028	_	0.176361	0.165081
Q13283	Ras GTPase-activating protein-binding protein 1 (G3BP-1) (EC 3.6.4.12) (EC 3.6.4.13) (ATP-dependent DNA helicase VIII) (hDH VIII) (GAP SH3 domain-binding protein 1)	psother292	1	466	466	_	Homo sapiens	Stress granule	31772125	137	349	213	8.3	91.74	[6.8-9.0]; 90.44	4.1	38.28	[4.0-4.3]; 39.48	_	88.17	4	53.46	False	Non-confident transition	None	4.1	0.26	8.3	-0.016	-0.000338911	0.276	_	-0.0156055	0.25965
Q13283	Ras GTPase-activating protein-binding protein 1 (G3BP-1) (EC 3.6.4.12) (EC 3.6.4.13) (ATP-dependent DNA helicase VIII) (hDH VIII) (GAP SH3 domain-binding protein 1)	psother292	1	466	466	_	Homo sapiens	Stress granule	31772125	411	465	55	6.7	111.03	[6.0-7.5]; 110.57	9	98.08	[9.0-9.0]; 98.08	_	110.87	12.6	12.95	False	Unfolded	None	9	-0.082	4	-0.127	-0.122163	0.045	_	-0.121995	-0.0820143
Q13402	Unconventional myosin-VIIa	psother286	1	2215	2215	_	Homo sapiens	Receptor cluster	31644917	878	909	32	6.4	182.15	[5.8-7.0]; 181.01	9	146.98	[8.9-9.0]; 148.12	_	179.28	9.6	35.17	False	Unfolded	None	9	-0.173	4	-0.388	-0.301598	0.215	_	-0.31998	-0.173439
Q13402	Unconventional myosin-VIIa	psother286	1	2215	2215	_	Homo sapiens	Receptor cluster	31644917	912	938	27	6.5	171.83	[5.9-7.1]; 170.67	9	138.96	[8.9-9.0]; 140.06	_	169.76	9.6	32.87	False	Unfolded	None	9	-0.136	4	-0.339	-0.251756	0.203	_	-0.264294	-0.136027
Q13402	Unconventional myosin-VIIa	psother286	1	2215	2215	_	Homo sapiens	Receptor cluster	31644917	954	975	22	8.3	101.61	[7.1-9.0]; 100.38	4	60.54	[4.0-4.4]; 62.08	_	96.86	4.6	41.07	True	F->U	6.85	4.6	0.151	8.3	-0.022	-0.00429062	0.173	_	-0.0215572	0.118143
Q13402	Unconventional myosin-VIIa	psother286	1	2215	2215	_	Homo sapiens	Receptor cluster	31644917	1125	1145	21	8.3	117.44	[6.9-9.0]; 116.43	4	77.58	[4.0-4.3]; 79.04	_	114.45	4.2	39.86	True	F->U	4.95	4.2	0.113	8.5	-0.185	-0.163669	0.298	_	-0.18416	0.0965382
Q13439	Golgin subfamily A member 4 (256 kDa golgin) (Golgin-245) (Protein 72.1) (Trans-Golgi p230)	psother381	1	2230	2230	_	Homo sapiens	Golgin condensate	32668013	4	64	61	6.9	97.26	[6.2-7.7]; 96.73	4	82.68	[4.0-4.3]; 83.2	_	97.23	9.6	14.58	False	Folded	None	9	0.064	4	0.037	0.037753	0.027	_	0.0378951	0.0368508
Q13439	Golgin subfamily A member 4 (256 kDa golgin) (Golgin-245) (Protein 72.1) (Trans-Golgi p230)	psother381	1	2230	2230	_	Homo sapiens	Golgin condensate	32668013	96	132	37	9	133.55	[8.0-9.0]; 130.16	4	50.99	[4.0-4.4]; 54.58	_	110.72	3.4	82.56	True	F->U	4.95	4	0.149	9	-0.271	-0.180444	0.42	_	-0.271024	0.149345
Q13439	Golgin subfamily A member 4 (256 kDa golgin) (Golgin-245) (Protein 72.1) (Trans-Golgi p230)	psother381	1	2230	2230	_	Homo sapiens	Golgin condensate	32668013	253	279	27	8	97.3	[6.7-9.0]; 96.19	4	39.53	[4.0-4.3]; 41.99	_	94.87	3.6	57.77	True	F->U	5.05	4	0.21	7.9	-0.152	-0.144983	0.362	_	-0.152161	0.209579
Q13439	Golgin subfamily A member 4 (256 kDa golgin) (Golgin-245) (Protein 72.1) (Trans-Golgi p230)	psother381	1	2230	2230	_	Homo sapiens	Golgin condensate	32668013	359	450	92	6.7	136.42	[6.2-7.4]; 135.4	4	104.49	[4.0-4.5]; 105.71	_	135.94	4.8	31.93	False	Unfolded	None	4.9	-0.008	6.8	-0.141	-0.140376	0.133	_	-0.140938	-0.0759037
Q13439	Golgin subfamily A member 4 (256 kDa golgin) (Golgin-245) (Protein 72.1) (Trans-Golgi p230)	psother381	1	2230	2230	_	Homo sapiens	Golgin condensate	32668013	714	742	29	6.4	133.28	[5.9-7.1]; 132.49	4	108.5	[4.0-4.2]; 109.43	_	131.71	5.7	24.78	False	Unfolded	None	5.2	-0.052	6.9	-0.138	-0.13794	0.086	_	-0.128645	-0.100834
Q13439	Golgin subfamily A member 4 (256 kDa golgin) (Golgin-245) (Protein 72.1) (Trans-Golgi p230)	psother381	1	2230	2230	_	Homo sapiens	Golgin condensate	32668013	1499	1523	25	6.6	174.32	[6.0-7.2]; 172.96	4	132.46	[4.0-4.3]; 134.38	_	172.62	4.6	41.86	False	Unfolded	None	4.6	-0.113	6.6	-0.3	-0.294317	0.187	_	-0.300379	-0.171082
Q13439	Golgin subfamily A member 4 (256 kDa golgin) (Golgin-245) (Protein 72.1) (Trans-Golgi p230)	psother381	1	2230	2230	_	Homo sapiens	Golgin condensate	32668013	1661	1683	23	6.4	148.36	[5.9-7.0]; 147.3	9	116.83	[4.0-9.0]; 118.75	_	145.51	4.8	31.53	False	Unfolded	None	4.9	-0.075	6.7	-0.216	-0.211845	0.141	_	-0.211831	-0.117368
Q13439	Golgin subfamily A member 4 (256 kDa golgin) (Golgin-245) (Protein 72.1) (Trans-Golgi p230)	psother381	1	2230	2230	_	Homo sapiens	Golgin condensate	32668013	1883	1921	39	6.3	97.9	[5.7-6.9]; 97.2	9	77.39	[8.9-9.0]; 77.96	_	95.76	7	20.51	False	Non-confident transition	None	9	0.1	4	-0.015	0.0305885	0.115	_	0.0169624	0.100183
Q13439	Golgin subfamily A member 4 (256 kDa golgin) (Golgin-245) (Protein 72.1) (Trans-Golgi p230)	psother381	1	2230	2230	_	Homo sapiens	Golgin condensate	32668013	1964	1994	31	6.8	147.33	[6.1-7.7]; 145.62	4	102.06	[4.0-4.3]; 103.8	_	147.1	4.4	45.27	False	Non-confident transition	None	4.5	0	7	-0.257	-0.25749	0.257	_	-0.256692	-0.0540469
Q13439	Golgin subfamily A member 4 (256 kDa golgin) (Golgin-245) (Protein 72.1) (Trans-Golgi p230)	psother381	1	2230	2230	_	Homo sapiens	Golgin condensate	32668013	2085	2108	24	6.7	100.8	[6.1-7.4]; 99.85	4	72.19	[4.0-4.3]; 73.38	_	100.18	4.3	28.61	Possible Multitransition	Variable	[5.649999999999994; 8.349999999999984]	4.3	0.14	6.7	-0.034	-0.0328616	0.174	_	-0.0341369	0.117043
Q13501	Sequestosome-1 (EBI3-associated protein of 60 kDa) (EBIAP) (p60) (Phosphotyrosine-independent ligand for the Lck SH2 domain of 62 kDa) (Ubiquitin-binding protein p62)	psother295	254	310	57	pH 7.4	Homo sapiens	p62 cluster	31857589	254	311	58	7.7	100.34	[6.5-9.0]; 99.36	4	68.9	[4.0-4.3]; 69.76	10% maximum solubility	99.53	4.2	31.44	True	F->U	5.95	4.2	0.137	7.5	-0.033	-0.0308206	0.17	Unfolded	-0.0324725	0.124511
Q13501	Sequestosome-1 (EBI3-associated protein of 60 kDa) (EBIAP) (p60) (Phosphotyrosine-independent ligand for the Lck SH2 domain of 62 kDa) (Ubiquitin-binding protein p62)	psother296	1	440	440	pH 7.4	Homo sapiens	p62 cluster	31916398	198	240	43	7.5	46.25	[6.6-8.6]; 45.64	4	26.22	[4.0-4.4]; 27.02	10% maximum solubility	45.84	4.6	20.03	False	Folded	None	4.7	0.286	7.8	0.2	0.203775	0.086	Folded	0.200588	0.263154
Q13501	Sequestosome-1 (EBI3-associated protein of 60 kDa) (EBIAP) (p60) (Phosphotyrosine-independent ligand for the Lck SH2 domain of 62 kDa) (Ubiquitin-binding protein p62)	psother296	1	440	440	pH 7.4	Homo sapiens	p62 cluster	31916398	248	401	154	8.3	94.83	[6.8-9.0]; 93.74	4	47.86	[4.0-4.2]; 49.68	10% maximum solubility	91.82	3.9	46.97	True	F->U	6.45	4	0.228	8.3	-0.027	-0.0160209	0.255	Unfolded	-0.0270562	0.227527
Q13618	Cullin-3 (CUL-3)	psother131	1	768	768	_	Homo sapiens	Nuclear speckle	30244836	676	699	24	8	176.67	[6.7-8.9]; 174.95	4	123.39	[4.0-4.3]; 125.55	_	173.67	4.8	53.28	False	Unfolded	None	4.7	-0.1	7.9	-0.278	-0.269237	0.178	_	-0.278077	-0.139239
Q13823	Nucleolar GTP-binding protein 2 (Autoantigen NGP-1)	psother44	682	709	28	_	Homo sapiens	Nucleolus	26836305	682	710	29	5.2	179.23	[4.0-6.3]; 178.36	9	140.66	[8.9-9.0]; 141.88	_	169.97	12.7	38.57	False	Unfolded	None	9	-0.418	4	-0.611	-0.531017	0.193	_	-0.593825	-0.417866
Q13950	Runt-related transcription factor 2 (Acute myeloid leukemia 3 protein) (Core-binding factor subunit alpha-1) (CBF-alpha-1) (Oncogene AML-3) (Osteoblast-specific transcription factor 2) (OSF-2) (Polyomavirus enhancer-binding protein 2 alpha A subunit) (PEA2-alpha A) (PEBP2-alpha A) (SL3-3 enhancer factor 1 alpha A subunit) (SL3/AKV core-binding factor alpha A subunit)	psself208	1	521	521	_	Homo sapiens	Transcriptional condensate	32386547	18	78	61	8.3	67.32	[7.3-9.0]; 67.01	4	57.07	[4.0-4.4]; 57.51	_	65.95	7	10.25	False	Folded	None	4.8	0.181	8.2	0.163	0.166091	0.018	_	0.163228	0.174382
Q13950	Runt-related transcription factor 2 (Acute myeloid leukemia 3 protein) (Core-binding factor subunit alpha-1) (CBF-alpha-1) (Oncogene AML-3) (Osteoblast-specific transcription factor 2) (OSF-2) (Polyomavirus enhancer-binding protein 2 alpha A subunit) (PEA2-alpha A) (PEBP2-alpha A) (SL3-3 enhancer factor 1 alpha A subunit) (SL3/AKV core-binding factor alpha A subunit)	psself208	1	521	521	_	Homo sapiens	Transcriptional condensate	32386547	87	110	24	8.6	64.18	[7.8-9.0]; 63.39	4	36.48	[4.0-4.4]; 37.82	_	56.86	10.5	27.7	False	Folded	None	6.9	0.206	4	0.153	0.205861	0.053	_	0.189449	0.152719
Q13950	Runt-related transcription factor 2 (Acute myeloid leukemia 3 protein) (Core-binding factor subunit alpha-1) (CBF-alpha-1) (Oncogene AML-3) (Osteoblast-specific transcription factor 2) (OSF-2) (Polyomavirus enhancer-binding protein 2 alpha A subunit) (PEA2-alpha A) (PEBP2-alpha A) (SL3-3 enhancer factor 1 alpha A subunit) (SL3/AKV core-binding factor alpha A subunit)	psself208	1	521	521	_	Homo sapiens	Transcriptional condensate	32386547	214	250	37	8	126.79	[7.0-8.7]; 125.93	4	102.01	[4.0-4.2]; 102.83	_	124.61	11.4	24.78	False	Unfolded	None	9	-0.12	4	-0.163	-0.142553	0.043	_	-0.143753	-0.163305
Q13950	Runt-related transcription factor 2 (Acute myeloid leukemia 3 protein) (Core-binding factor subunit alpha-1) (CBF-alpha-1) (Oncogene AML-3) (Osteoblast-specific transcription factor 2) (OSF-2) (Polyomavirus enhancer-binding protein 2 alpha A subunit) (PEA2-alpha A) (PEBP2-alpha A) (SL3-3 enhancer factor 1 alpha A subunit) (SL3/AKV core-binding factor alpha A subunit)	psself208	1	521	521	_	Homo sapiens	Transcriptional condensate	32386547	252	304	53	8.6	32.12	[7.9-9.0]; 31.86	4	23.31	[4.0-4.4]; 23.69	_	29.28	10.1	8.81	False	Folded	None	6.5	0.295	8.5	0.285	0.293542	0.01	_	0.285139	0.29036
Q13950	Runt-related transcription factor 2 (Acute myeloid leukemia 3 protein) (Core-binding factor subunit alpha-1) (CBF-alpha-1) (Oncogene AML-3) (Osteoblast-specific transcription factor 2) (OSF-2) (Polyomavirus enhancer-binding protein 2 alpha A subunit) (PEA2-alpha A) (PEBP2-alpha A) (SL3-3 enhancer factor 1 alpha A subunit) (SL3/AKV core-binding factor alpha A subunit)	psself208	1	521	521	_	Homo sapiens	Transcriptional condensate	32386547	308	341	34	8.5	52.81	[7.8-9.0]; 52.39	4	40.25	[4.0-4.4]; 40.82	_	49	12.2	12.56	False	Folded	None	6.6	0.202	8.5	0.188	0.200727	0.014	_	0.188469	0.191937
Q13950	Runt-related transcription factor 2 (Acute myeloid leukemia 3 protein) (Core-binding factor subunit alpha-1) (CBF-alpha-1) (Oncogene AML-3) (Osteoblast-specific transcription factor 2) (OSF-2) (Polyomavirus enhancer-binding protein 2 alpha A subunit) (PEA2-alpha A) (PEBP2-alpha A) (SL3-3 enhancer factor 1 alpha A subunit) (SL3/AKV core-binding factor alpha A subunit)	psself208	1	521	521	_	Homo sapiens	Transcriptional condensate	32386547	362	383	22	8.8	23.26	[7.6-9.0]; 22.49	4	-1.3	[4.0-4.4]; -0.2	_	18.35	4	24.56	False	Folded	None	4	0.419	8.8	0.288	0.305921	0.131	_	0.287877	0.418713
Q13950	Runt-related transcription factor 2 (Acute myeloid leukemia 3 protein) (Core-binding factor subunit alpha-1) (CBF-alpha-1) (Oncogene AML-3) (Osteoblast-specific transcription factor 2) (OSF-2) (Polyomavirus enhancer-binding protein 2 alpha A subunit) (PEA2-alpha A) (PEBP2-alpha A) (SL3-3 enhancer factor 1 alpha A subunit) (SL3/AKV core-binding factor alpha A subunit)	psself208	1	521	521	_	Homo sapiens	Transcriptional condensate	32386547	419	443	25	4	11.9	[4.0-5.1]; 11.79	9	8.43	[7.2-9.0]; 8.5	_	8.86	7.9	3.47	False	Folded	None	9	0.378	4	0.325	0.372668	0.053	_	0.324896	0.378019
Q13950	Runt-related transcription factor 2 (Acute myeloid leukemia 3 protein) (Core-binding factor subunit alpha-1) (CBF-alpha-1) (Oncogene AML-3) (Osteoblast-specific transcription factor 2) (OSF-2) (Polyomavirus enhancer-binding protein 2 alpha A subunit) (PEA2-alpha A) (PEBP2-alpha A) (SL3-3 enhancer factor 1 alpha A subunit) (SL3/AKV core-binding factor alpha A subunit)	psself208	1	521	521	_	Homo sapiens	Transcriptional condensate	32386547	456	515	60	9	63.1	[8.0-9.0]; 62.09	4	32.5	[4.0-4.4]; 33.83	_	54.22	4.3	30.6	False	Folded	None	4	0.291	9	0.138	0.172959	0.153	_	0.138193	0.291001
Q14011	Cold-inducible RNA-binding protein (A18 hnRNP) (Glycine-rich RNA-binding protein CIRP)	psother325	90	137	48	_	Homo sapiens	Stress granule	32234784	90	138	49	7.7	113.86	[7.0-8.2]; 113.58	4	105.14	[4.0-4.4]; 105.48	_	113.1	12.6	8.72	False	Unfolded	None	9	-0.158	7.8	-0.182	-0.178513	0.024	_	-0.181723	-0.165447
Q14011	Cold-inducible RNA-binding protein (A18 hnRNP) (Glycine-rich RNA-binding protein CIRP)	psself22	1	172	172	_	Homo sapiens	_	24267890;29424691	65	112	48	7.5	126.89	[6.6-8.1]; 126.6	4	117.27	[4.0-4.2]; 117.59	_	126.59	12.7	9.62	False	Unfolded	None	9	-0.215	7.6	-0.242	-0.240067	0.027	_	-0.241915	-0.218579
Q14011	Cold-inducible RNA-binding protein (A18 hnRNP) (Glycine-rich RNA-binding protein CIRP)	psself22	1	172	172	_	Homo sapiens	_	24267890;29424691	134	172	39	8.8	131.57	[7.9-9.0]; 130.63	4	97.58	[4.0-4.5]; 99.16	_	121.91	5.2	33.99	False	Non-confident transition	None	4.7	0.017	8.7	-0.104	-0.0661748	0.121	_	-0.104226	0.00360852
Q14157	Ubiquitin-associated protein 2-like (Protein NICE-4)	psother301	1	1087	1087	_	Homo sapiens	Stress granule	31956030	1	59	59	7.7	89.43	[6.6-8.6]; 88.9	4	71.49	[4.0-4.3]; 72.18	_	88.82	6.6	17.94	False	Folded	None	5	0.086	7.8	0.057	0.0610745	0.029	_	0.0570153	0.0610813
Q14157	Ubiquitin-associated protein 2-like (Protein NICE-4)	psother301	1	1087	1087	_	Homo sapiens	Stress granule	31956030	80	258	179	8	121.97	[7.0-8.7]; 121.21	4	98.84	[4.0-4.6]; 99.6	_	119.75	9.6	23.13	False	Non-confident transition	None	4.9	0.004	8	-0.044	-0.0373375	0.048	_	-0.0439138	-0.023593
Q14157	Ubiquitin-associated protein 2-like (Protein NICE-4)	psother301	1	1087	1087	_	Homo sapiens	Stress granule	31956030	287	323	37	7.1	43.83	[6.2-8.3]; 43.45	4	31.85	[4.0-4.2]; 32.22	_	43.83	4.3	11.98	False	Folded	None	4.2	0.306	8.2	0.227	0.230795	0.079	_	0.230231	0.303668
Q14157	Ubiquitin-associated protein 2-like (Protein NICE-4)	psother301	1	1087	1087	_	Homo sapiens	Stress granule	31956030	373	424	52	8.1	54.07	[5.5-8.7]; 53.89	4	49.25	[4.0-4.1]; 49.39	_	53.76	8.8	4.82	False	Folded	None	7.3	0.218	4	0.194	0.217142	0.024	_	0.216187	0.193929
Q14157	Ubiquitin-associated protein 2-like (Protein NICE-4)	psother301	1	1087	1087	_	Homo sapiens	Stress granule	31956030	434	507	74	5.6	51.51	[4.0-6.4]; 50.58	9	28.09	[8.8-9.0]; 29.04	_	45.62	10.2	23.42	False	Folded	None	9	0.244	4	0.138	0.175359	0.106	_	0.149816	0.24407
Q14157	Ubiquitin-associated protein 2-like (Protein NICE-4)	psother301	1	1087	1087	_	Homo sapiens	Stress granule	31956030	525	757	233	7.7	67.15	[6.7-9.0]; 66.84	4.6	57.14	[4.0-4.9]; 57.33	_	66.79	4.8	10.01	False	Folded	None	4.8	0.197	7.8	0.147	0.148768	0.05	_	0.146802	0.194673
Q14157	Ubiquitin-associated protein 2-like (Protein NICE-4)	psother301	1	1087	1087	_	Homo sapiens	Stress granule	31956030	763	802	40	4.1	13.16	[4.0-5.9]; 12.97	9	5	[8.8-9.0]; 5.36	_	10.49	13.9	8.16	False	Folded	None	9	0.33	4	0.294	0.305318	0.036	_	0.293884	0.329554
Q14157	Ubiquitin-associated protein 2-like (Protein NICE-4)	psother301	1	1087	1087	_	Homo sapiens	Stress granule	31956030	845	900	56	8.6	48.19	[7.8-9.0]; 47.93	4	39.98	[4.0-4.3]; 40.37	_	45.94	8.8	8.21	False	Folded	None	7	0.238	4	0.219	0.237974	0.019	_	0.232657	0.218747
Q14157	Ubiquitin-associated protein 2-like (Protein NICE-4)	psother301	1	1087	1087	_	Homo sapiens	Stress granule	31956030	940	987	48	9	31.96	[8.7-9.0]; 31.84	4	28.47	[4.0-4.3]; 28.61	_	29.64	6.6	3.49	False	Folded	None	6	0.297	9	0.271	0.281203	0.026	_	0.270767	0.273857
Q14157	Ubiquitin-associated protein 2-like (Protein NICE-4)	psother301	1	1087	1087	_	Homo sapiens	Stress granule	31956030	1018	1082	65	4.6	47.91	[4.0-5.5]; 47.57	9	31.9	[8.5-9.0]; 32.65	_	37.5	9.8	16.01	False	Folded	None	9	0.245	4	0.106	0.22017	0.139	_	0.110257	0.245354
Q14444	Caprin-1 (Cell cycle-associated protein 1) (Cytoplasmic activation- and proliferation-associated protein 1) (GPI-anchored membrane protein 1) (GPI-anchored protein p137) (GPI-p137) (p137GPI) (Membrane component chromosome 11 surface marker 1) (RNA granule protein 105)	psother344	1	709	709	_	Homo sapiens	Stress granule	32302565;32302570	1	54	54	6.4	46.72	[5.4-6.9]; 46.61	9	43.19	[8.8-9.0]; 43.35	_	46.31	6.6	3.53	False	Folded	None	6	0.248	4	0.219	0.235951	0.029	_	0.241205	0.243301
Q14444	Caprin-1 (Cell cycle-associated protein 1) (Cytoplasmic activation- and proliferation-associated protein 1) (GPI-anchored membrane protein 1) (GPI-anchored protein p137) (GPI-p137) (p137GPI) (Membrane component chromosome 11 surface marker 1) (RNA granule protein 105)	psother344	1	709	709	_	Homo sapiens	Stress granule	32302565;32302570	70	97	28	6.7	144.02	[6.0-7.6]; 143.08	4	117.04	[4.0-4.2]; 118.06	_	143.73	9.2	26.98	False	Unfolded	None	9	-0.092	6.7	-0.153	-0.151397	0.061	_	-0.152625	-0.138316
Q14444	Caprin-1 (Cell cycle-associated protein 1) (Cytoplasmic activation- and proliferation-associated protein 1) (GPI-anchored membrane protein 1) (GPI-anchored protein p137) (GPI-p137) (p137GPI) (Membrane component chromosome 11 surface marker 1) (RNA granule protein 105)	psother344	1	709	709	_	Homo sapiens	Stress granule	32302565;32302570	251	362	112	8.5	92.9	[6.9-9.0]; 91.61	4	38.72	[4.0-4.3]; 41.32	_	88.64	3.6	54.18	True	F->U	6.15	4	0.258	8.6	-0.061	-0.0431912	0.319	_	-0.0606382	0.257751
Q14444	Caprin-1 (Cell cycle-associated protein 1) (Cytoplasmic activation- and proliferation-associated protein 1) (GPI-anchored membrane protein 1) (GPI-anchored protein p137) (GPI-p137) (p137GPI) (Membrane component chromosome 11 surface marker 1) (RNA granule protein 105)	psother344	1	709	709	_	Homo sapiens	Stress granule	32302565;32302570	383	709	327	7.9	53.11	[7.3-8.3]; 53.04	4.5	51.23	[4.2-4.8]; 51.3	_	52.81	9.2	1.88	False	Folded	None	9	0.217	4	0.195	0.210937	0.022	_	0.21071	0.20301
Q14596	Next to BRCA1 gene 1 protein (Cell migration-inducing gene 19 protein) (Membrane component chromosome 17 surface marker 2) (Neighbor of BRCA1 gene 1 protein) (Protein 1A1-3B)	psother90	1	966	966	_	Homo sapiens	p62 cluster	29343546	579	622	44	8.4	42.94	[6.8-9.0]; 42.12	4	8.26	[4.0-4.3]; 9.86	_	40.64	4	34.68	False	Folded	None	4	0.371	8.3	0.123	0.133424	0.248	_	0.123402	0.37106
Q14596	Next to BRCA1 gene 1 protein (Cell migration-inducing gene 19 protein) (Membrane component chromosome 17 surface marker 2) (Neighbor of BRCA1 gene 1 protein) (Protein 1A1-3B)	psother90	1	966	966	_	Homo sapiens	p62 cluster	29343546	660	729	70	8.6	130.54	[6.9-9.0]; 128.6	4	52.66	[4.0-4.3]; 56.19	_	124.28	3.5	77.88	True	F->U	4.65	4	0.164	8.7	-0.338	-0.312111	0.502	_	-0.338251	0.163566
Q14596	Next to BRCA1 gene 1 protein (Cell migration-inducing gene 19 protein) (Membrane component chromosome 17 surface marker 2) (Neighbor of BRCA1 gene 1 protein) (Protein 1A1-3B)	psother90	1	966	966	_	Homo sapiens	p62 cluster	29343546	746	804	59	8.4	83.57	[6.9-9.0]; 82.72	4	45.85	[4.0-4.3]; 47.5	_	80.75	3.8	37.72	False	Non-confident transition	None	4	0.235	8.1	-0.004	0.004183	0.239	_	-0.00351718	0.234543
Q14596	Next to BRCA1 gene 1 protein (Cell migration-inducing gene 19 protein) (Membrane component chromosome 17 surface marker 2) (Neighbor of BRCA1 gene 1 protein) (Protein 1A1-3B)	psother90	1	966	966	_	Homo sapiens	p62 cluster	29343546	819	879	61	5.6	87.23	[5.2-5.9]; 87.06	4	82.93	[4.0-4.1]; 83.06	_	84.61	8.8	4.3	False	Non-confident transition	None	9	0.105	4	-0.007	0.0952087	0.112	_	0.0295389	-0.00682531
Q14671	Pumilio homolog 1 (HsPUM) (Pumilio-1)	psother208	1	1186	1186	_	Homo sapiens	_	31324804	17	73	57	4.7	25.46	[4.0-5.6]; 25.25	9	14.85	[8.4-9.0]; 15.33	_	18.83	8.8	10.61	False	Folded	None	9	0.35	4	0.247	0.332844	0.103	_	0.254463	0.350154
Q14671	Pumilio homolog 1 (HsPUM) (Pumilio-1)	psother208	1	1186	1186	_	Homo sapiens	_	31324804	90	131	42	8.5	103.22	[7.4-9.0]; 102.6	4	82.1	[4.0-4.3]; 82.88	_	100.04	6.1	21.12	True	F->U	6.75	5.6	0.069	8.4	-0.025	-0.0083881	0.094	_	-0.0247813	0.0229386
Q14671	Pumilio homolog 1 (HsPUM) (Pumilio-1)	psother208	1	1186	1186	_	Homo sapiens	_	31324804	177	213	37	8.2	71.95	[7.3-8.8]; 71.58	4	61.26	[4.0-4.3]; 61.67	_	70.37	10.5	10.69	False	Folded	None	9	0.168	4	0.11	0.16327	0.058	_	0.162732	0.110264
Q14671	Pumilio homolog 1 (HsPUM) (Pumilio-1)	psother208	1	1186	1186	_	Homo sapiens	_	31324804	233	362	130	8.3	88.01	[6.9-9.0]; 86.89	4	44.13	[4.0-4.2]; 45.92	_	84.64	4	43.88	False	Folded	None	4	0.238	8.4	0.007	0.0192114	0.231	_	0.00679145	0.238461
Q14671	Pumilio homolog 1 (HsPUM) (Pumilio-1)	psother208	1	1186	1186	_	Homo sapiens	_	31324804	484	527	44	8.5	71.29	[7.8-9.0]; 71.06	4	63.16	[4.0-4.5]; 63.54	_	69.13	12.5	8.13	False	Folded	None	4.6	0.15	8.2	0.136	0.140385	0.014	_	0.136837	0.147778
Q14671	Pumilio homolog 1 (HsPUM) (Pumilio-1)	psother208	1	1186	1186	_	Homo sapiens	_	31324804	611	648	38	6.3	17.24	[4.0-7.7]; 17.23	9	16.21	[9.0-9.0]; 16.21	_	17.22	11.4	1.03	False	Folded	None	9	0.314	4	0.31	0.310362	0.004	_	0.310309	0.314294
Q14671	Pumilio homolog 1 (HsPUM) (Pumilio-1)	psother208	1	1186	1186	_	Homo sapiens	_	31324804	656	677	22	9	19.21	[4.0-4.0]; 19.21	9	19.21	[4.0-4.0]; 19.21	_	19.21	7	0	False	Folded	None	4	0.326	4	0.326	0.325673	0	_	0.325673	0.325673
Q14671	Pumilio homolog 1 (HsPUM) (Pumilio-1)	psother208	1	1186	1186	_	Homo sapiens	_	31324804	694	721	28	8	112.26	[7.1-8.6]; 111.81	4	98.83	[4.0-4.3]; 99.44	_	110.83	11.4	13.43	False	Unfolded	None	4.5	-0.03	8.1	-0.064	-0.058497	0.034	_	-0.0643499	-0.034373
Q14671	Pumilio homolog 1 (HsPUM) (Pumilio-1)	psother208	1	1186	1186	_	Homo sapiens	_	31324804	742	774	33	4	28.65	[4.0-5.1]; 28.42	9	21.9	[7.2-9.0]; 22.04	_	22.73	10.5	6.75	False	Folded	None	9	0.321	4	0.239	0.312714	0.082	_	0.239244	0.320982
Q14676	Mediator of DNA damage checkpoint protein 1 (Nuclear factor with BRCT domains 1)	psother177	1	2089	2089	_	Homo sapiens	DNA damage foci	31267591	2	25	24	9	173.13	[7.6-9.0]; 168.94	4	59.59	[4.0-4.4]; 64.68	_	153.75	3.1	113.54	True	F->U	4.05	4	0.025	9	-0.634	-0.563622	0.659	_	-0.634394	0.0253837
Q14676	Mediator of DNA damage checkpoint protein 1 (Nuclear factor with BRCT domains 1)	psother177	1	2089	2089	_	Homo sapiens	DNA damage foci	31267591	146	167	22	8.4	97.3	[7.0-9.0]; 95.96	4	45.92	[4.0-4.4]; 48.37	_	92.35	3.9	51.38	True	F->U	5.85	4	0.237	8.5	-0.08	-0.0579484	0.317	_	-0.0795284	0.237109
Q14676	Mediator of DNA damage checkpoint protein 1 (Nuclear factor with BRCT domains 1)	psother177	1	2089	2089	_	Homo sapiens	DNA damage foci	31267591	185	345	161	8.6	96.27	[7.2-9.0]; 94.76	4	39.27	[4.0-4.2]; 41.36	_	89.78	3.9	57	True	F->U	6.95	4	0.265	8.6	-0.028	-0.00290568	0.293	_	-0.0281014	0.265362
Q14676	Mediator of DNA damage checkpoint protein 1 (Nuclear factor with BRCT domains 1)	psother177	1	2089	2089	_	Homo sapiens	DNA damage foci	31267591	349	470	122	8.4	103.8	[7.0-9.0]; 102.52	4	53.23	[4.0-4.3]; 54.57	_	99.27	4.2	50.57	True	F->U	6.05	4.1	0.208	8.5	-0.07	-0.0493873	0.278	_	-0.0695646	0.200533
Q14676	Mediator of DNA damage checkpoint protein 1 (Nuclear factor with BRCT domains 1)	psother177	1	2089	2089	_	Homo sapiens	DNA damage foci	31267591	475	554	80	7.3	85.94	[6.4-8.5]; 85.32	4	66.59	[4.0-4.3]; 67.34	_	85.79	6.1	19.35	False	Folded	None	4.9	0.128	7.7	0.068	0.0717804	0.06	_	0.0689458	0.102297
Q14676	Mediator of DNA damage checkpoint protein 1 (Nuclear factor with BRCT domains 1)	psother177	1	2089	2089	_	Homo sapiens	DNA damage foci	31267591	573	703	131	8.8	102.99	[7.4-9.0]; 101.11	4	45.03	[4.0-4.3]; 47.87	_	94.21	3.8	57.96	True	F->U	6.05	4	0.224	8.8	-0.076	-0.0449294	0.3	_	-0.0755556	0.224
Q14676	Mediator of DNA damage checkpoint protein 1 (Nuclear factor with BRCT domains 1)	psother177	1	2089	2089	_	Homo sapiens	DNA damage foci	31267591	705	1889	1185	6.4	85.77	[5.6-7.2]; 85.45	9	75.86	[9.0-9.0]; 75.86	_	85.33	8.8	9.91	False	Folded	None	9	0.148	4	0.104	0.116066	0.044	_	0.116708	0.147922
Q14694	Ubiquitin carboxyl-terminal hydrolase 10 (EC 3.4.19.12) (Deubiquitinating enzyme 10) (Ubiquitin thioesterase 10) (Ubiquitin-specific-processing protease 10)	psother345	1	798	798	_	Homo sapiens	Stress granule	32302565;32302570	126	166	41	6.3	118.4	[5.6-6.9]; 117.55	9	93.24	[8.9-9.0]; 94.04	_	115.8	9.7	25.16	False	Unfolded	None	9	-0.004	4	-0.133	-0.0991932	0.129	_	-0.111869	-0.00414711
Q14694	Ubiquitin carboxyl-terminal hydrolase 10 (EC 3.4.19.12) (Deubiquitinating enzyme 10) (Ubiquitin thioesterase 10) (Ubiquitin-specific-processing protease 10)	psother345	1	798	798	_	Homo sapiens	Stress granule	32302565;32302570	170	335	166	9	64.87	[7.7-9.0]; 63.27	4	22.77	[4.0-4.3]; 24.79	_	56.6	3.6	42.1	False	Folded	None	4	0.308	9	0.095	0.127824	0.213	_	0.0954786	0.308263
Q14694	Ubiquitin carboxyl-terminal hydrolase 10 (EC 3.4.19.12) (Deubiquitinating enzyme 10) (Ubiquitin thioesterase 10) (Ubiquitin-specific-processing protease 10)	psother345	1	798	798	_	Homo sapiens	Stress granule	32302565;32302570	551	587	37	7.5	134.24	[6.5-9.0]; 132.55	4	80.33	[4.0-4.3]; 82.75	_	133.42	3.8	53.91	True	F->U	4.45	4	0.093	7.6	-0.313	-0.306482	0.406	_	-0.312755	0.0932878
Q14781	Chromobox protein homolog 2	psself255	1	532	532	pH 7.4	Homo sapiens	Polycomb body	33053359	58	212	155	5.9	130.16	[5.1-6.7]; 129.13	9	101.55	[8.9-9.0]; 102.45	Middle	125.54	10.9	28.61	False	Unfolded	None	9	-0.065	4	-0.201	-0.15735	0.136	Unfolded	-0.180679	-0.0647628
Q14781	Chromobox protein homolog 2	psself255	1	532	532	pH 7.4	Homo sapiens	Polycomb body	33053359	215	249	35	5.7	60.79	[4.7-6.5]; 60.02	9	40.61	[8.8-9.0]; 41.51	Middle	56.02	9.7	20.18	False	Folded	None	9	0.234	4	0.115	0.174867	0.119	Folded	0.142525	0.234171
Q14781	Chromobox protein homolog 2	psself255	1	532	532	pH 7.4	Homo sapiens	Polycomb body	33053359	287	360	74	6	45.86	[5.3-6.7]; 45.43	9	34.55	[8.9-9.0]; 34.88	Middle	43.84	9.4	11.31	False	Folded	None	9	0.273	4	0.181	0.230226	0.092	Folded	0.209257	0.27291
Q14781	Chromobox protein homolog 2	psself255	1	532	532	pH 7.4	Homo sapiens	Polycomb body	33053359	362	494	133	6.7	65.43	[6.0-7.3]; 65.15	4	57.32	[4.0-4.4]; 57.65	10% maximum solubility	65.22	9.2	8.11	False	Folded	None	9	0.181	4	0.15	0.154849	0.031	Folded	0.1538	0.150207
Q15059	Bromodomain-containing protein 3 (RING3-like protein)	psother411	1	726	726	_	Homo sapiens	Transcriptional condensate	32895492	6	36	31	5.8	12.6	[4.6-6.6]; 12.02	9	-3.17	[8.8-9.0]; -2.39	_	9.46	11.4	15.77	False	Folded	None	9	0.374	4	0.308	0.328937	0.066	_	0.317512	0.374364
Q15059	Bromodomain-containing protein 3 (RING3-like protein)	psother411	1	726	726	_	Homo sapiens	Transcriptional condensate	32895492	144	180	37	5.9	45.9	[5.0-6.7]; 45.22	9	27.66	[8.8-9.0]; 28.54	_	42.69	10.3	18.24	False	Folded	None	9	0.257	4	0.155	0.193859	0.102	_	0.176633	0.257146
Q15059	Bromodomain-containing protein 3 (RING3-like protein)	psother411	1	726	726	_	Homo sapiens	Transcriptional condensate	32895492	182	202	21	9	-49.3	[4.0-4.0]; -49.3	9	-49.3	[4.0-4.0]; -49.3	_	-49.3	7	0	False	Folded	None	4	0.602	4	0.602	0.602445	0	_	0.602445	0.602445
Q15059	Bromodomain-containing protein 3 (RING3-like protein)	psother411	1	726	726	_	Homo sapiens	Transcriptional condensate	32895492	204	307	104	5.8	55.63	[4.9-6.6]; 54.76	9	32.45	[8.9-9.0]; 33.08	_	51.01	10.5	23.18	False	Folded	None	9	0.222	4	0.114	0.149325	0.108	_	0.127536	0.222097
Q15059	Bromodomain-containing protein 3 (RING3-like protein)	psother411	1	726	726	_	Homo sapiens	Transcriptional condensate	32895492	418	588	171	6.2	130.92	[5.5-6.8]; 129.86	9	97.3	[8.9-9.0]; 98.22	_	126.53	9.4	33.62	True	U->F	8.75	9	0.02	4	-0.147	-0.0909994	0.167	_	-0.109881	0.0203937
Q15059	Bromodomain-containing protein 3 (RING3-like protein)	psother411	1	726	726	_	Homo sapiens	Transcriptional condensate	32895492	590	622	33	8.1	93.15	[6.9-9.0]; 91.95	4	48.84	[4.0-4.4]; 50.8	_	90	4.5	44.31	True	F->U	6.65	4.5	0.202	8.3	-0.028	-0.0112546	0.23	_	-0.0276154	0.166248
Q15059	Bromodomain-containing protein 3 (RING3-like protein)	psother411	1	726	726	_	Homo sapiens	Transcriptional condensate	32895492	637	726	90	6	141.16	[5.2-6.7]; 140.07	9	109.26	[8.9-9.0]; 110.1	_	135.96	10.1	31.9	False	Unfolded	None	9	-0.054	4	-0.2	-0.15742	0.146	_	-0.177602	-0.0541383
Q15154	Pericentriolar material 1 protein (PCM-1) (hPCM-1)	psother111	1	2024	2024	_	Homo sapiens	Pericentriolar matrix	29973724	1	171	171	6.9	93.41	[6.2-7.7]; 93.02	4	81.3	[4.0-4.4]; 81.72	_	93.38	9.6	12.11	False	Folded	None	9	0.08	4	0.043	0.047365	0.037	_	0.047022	0.0426491
Q15154	Pericentriolar material 1 protein (PCM-1) (hPCM-1)	psother111	1	2024	2024	_	Homo sapiens	Pericentriolar matrix	29973724	345	402	58	7.3	105.22	[6.4-8.2]; 104.64	4	86.42	[4.0-4.3]; 87.12	_	105.06	10.9	18.8	False	Unfolded	None	9	-0.009	4	-0.04	-0.0358281	0.031	_	-0.0361641	-0.0396123
Q15154	Pericentriolar material 1 protein (PCM-1) (hPCM-1)	psother111	1	2024	2024	_	Homo sapiens	Pericentriolar matrix	29973724	408	498	91	6.9	83.79	[6.2-7.7]; 83.38	4	73.4	[4.0-4.3]; 73.76	_	83.77	7	10.39	False	Folded	None	9	0.113	4	0.079	0.100258	0.034	_	0.101036	0.0792547
Q15154	Pericentriolar material 1 protein (PCM-1) (hPCM-1)	psother111	1	2024	2024	_	Homo sapiens	Pericentriolar matrix	29973724	501	661	161	8.6	137.92	[7.0-9.0]; 136.11	4	72.21	[4.0-4.3]; 75.1	_	131.57	3.9	65.71	True	F->U	4.85	4	0.136	8.6	-0.228	-0.201761	0.364	_	-0.228374	0.136175
Q15154	Pericentriolar material 1 protein (PCM-1) (hPCM-1)	psother111	1	2024	2024	_	Homo sapiens	Pericentriolar matrix	29973724	680	738	59	7.9	111.47	[6.6-9.0]; 110.36	4	74.12	[4.0-4.3]; 75.43	_	110.06	4.3	37.35	True	F->U	5.45	4.2	0.118	7.7	-0.056	-0.0533864	0.174	_	-0.0562255	0.105766
Q15154	Pericentriolar material 1 protein (PCM-1) (hPCM-1)	psother111	1	2024	2024	_	Homo sapiens	Pericentriolar matrix	29973724	784	826	43	7	62.87	[6.2-8.1]; 61.99	4	38.12	[4.0-4.3]; 39.04	_	62.87	4.2	24.75	False	Folded	None	4.2	0.262	7.3	0.091	0.0918861	0.171	_	0.0918861	0.250537
Q15154	Pericentriolar material 1 protein (PCM-1) (hPCM-1)	psother111	1	2024	2024	_	Homo sapiens	Pericentriolar matrix	29973724	828	948	121	8.3	123.67	[6.9-9.0]; 122.42	4	76.77	[4.0-4.5]; 78.24	_	119.83	4.3	46.9	True	F->U	5.35	4.3	0.131	8.4	-0.125	-0.107543	0.256	_	-0.125383	0.108582
Q15154	Pericentriolar material 1 protein (PCM-1) (hPCM-1)	psother111	1	2024	2024	_	Homo sapiens	Pericentriolar matrix	29973724	1078	1105	28	6	117.65	[5.4-6.7]; 117.06	9	99.54	[8.9-9.0]; 100.06	_	114.7	10.1	18.11	True	U->F	8.35	9	0.025	4	-0.145	-0.0394044	0.17	_	-0.0796195	0.0246222
Q15154	Pericentriolar material 1 protein (PCM-1) (hPCM-1)	psother111	1	2024	2024	_	Homo sapiens	Pericentriolar matrix	29973724	1152	1213	62	6.6	65.24	[6.1-7.1]; 64.79	4	50.08	[4.0-9.0]; 50.76	_	64.47	4.8	15.16	False	Folded	None	9	0.214	6.6	0.157	0.160337	0.057	_	0.156926	0.16608
Q15154	Pericentriolar material 1 protein (PCM-1) (hPCM-1)	psother111	1	2024	2024	_	Homo sapiens	Pericentriolar matrix	29973724	1230	1314	85	6	124.43	[5.2-6.7]; 123.51	9	97.16	[8.9-9.0]; 98.0	_	120.17	10.7	27.27	False	Unfolded	None	9	-0.047	4	-0.147	-0.129007	0.1	_	-0.142128	-0.0469697
Q15154	Pericentriolar material 1 protein (PCM-1) (hPCM-1)	psother111	1	2024	2024	_	Homo sapiens	Pericentriolar matrix	29973724	1322	1348	27	6.3	95.53	[5.6-6.9]; 94.94	9	78.09	[8.9-9.0]; 78.64	_	93.69	8.3	17.44	True	U->F	5.95	9	0.084	4	-0.044	0.0223146	0.128	_	0.00669408	0.0835146
Q15154	Pericentriolar material 1 protein (PCM-1) (hPCM-1)	psother111	1	2024	2024	_	Homo sapiens	Pericentriolar matrix	29973724	1458	1491	34	8.6	127.05	[7.0-9.0]; 125.21	4	60.64	[4.0-4.3]; 63.47	_	120.56	3.8	66.41	True	F->U	4.65	4	0.145	8.5	-0.277	-0.253604	0.422	_	-0.27668	0.145292
Q15154	Pericentriolar material 1 protein (PCM-1) (hPCM-1)	psother111	1	2024	2024	_	Homo sapiens	Pericentriolar matrix	29973724	1553	1577	25	8	63.66	[6.7-9.0]; 63.04	4	38.37	[4.0-4.3]; 39.27	_	62.41	3.8	25.29	False	Folded	None	4	0.275	8	0.11	0.114914	0.165	_	0.110184	0.275307
Q15154	Pericentriolar material 1 protein (PCM-1) (hPCM-1)	psother111	1	2024	2024	_	Homo sapiens	Pericentriolar matrix	29973724	1724	1965	242	8.3	120.88	[6.7-9.0]; 119.39	4	56.38	[4.0-4.2]; 59.31	_	117.23	3.8	64.5	True	F->U	5.15	4	0.19	8.3	-0.142	-0.128828	0.332	_	-0.142439	0.189718
Q15154	Pericentriolar material 1 protein (PCM-1) (hPCM-1)	psother111	1	2024	2024	_	Homo sapiens	Pericentriolar matrix	29973724	1980	2024	45	6.9	109.68	[6.2-7.8]; 108.41	4	72.16	[4.0-4.3]; 73.22	_	109.65	4.2	37.52	True	F->U	5.35	4.3	0.162	7.1	-0.095	-0.0950581	0.257	_	-0.0941986	0.138727
Q15233	Non-POU domain-containing octamer-binding protein (NonO protein) (54 kDa nuclear RNA- and DNA-binding protein) (55 kDa nuclear protein) (DNA-binding p52/p100 complex; 52 kDa subunit) (NMT55) (p54(nrb)) (p54nrb)	psother106	1	471	471	_	Homo sapiens	Paraspeckle	29932899	1	66	66	4.9	101.62	[4.0-5.8]; 100.94	9	72.58	[8.7-9.0]; 73.82	_	87.52	10.5	29.04	True	U->F	6.45	9	0.093	4	-0.133	0.0351552	0.226	_	-0.111799	0.093224
Q15233	Non-POU domain-containing octamer-binding protein (NonO protein) (54 kDa nuclear RNA- and DNA-binding protein) (55 kDa nuclear protein) (DNA-binding p52/p100 complex; 52 kDa subunit) (NMT55) (p54(nrb)) (p54nrb)	psother106	1	471	471	_	Homo sapiens	Paraspeckle	29932899	281	471	191	7.4	96.18	[6.6-8.3]; 95.56	4.1	78.56	[4.0-4.7]; 78.95	_	95.78	8.8	17.62	False	Folded	None	5	0.095	4	0.056	0.0650623	0.039	_	0.0641222	0.061826
Q15468	SCL-interrupting locus protein (TAL-1-interrupting locus protein)	psother485	1	1287	1287	_	Homo sapiens	Centrosome	33323015	384	420	37	7.9	71.34	[6.4-8.8]; 70.74	4	51.77	[4.0-4.2]; 52.48	_	70.7	6.1	19.57	False	Folded	None	5.7	0.177	8.5	0.092	0.110297	0.085	_	0.0952698	0.152459
Q15468	SCL-interrupting locus protein (TAL-1-interrupting locus protein)	psother485	1	1287	1287	_	Homo sapiens	Centrosome	33323015	440	542	103	5.8	65.89	[5.2-6.5]; 65.29	9	50.05	[8.9-9.0]; 50.47	_	62.15	8.8	15.84	False	Folded	None	9	0.217	4	0.068	0.163387	0.149	_	0.116893	0.216976
Q15468	SCL-interrupting locus protein (TAL-1-interrupting locus protein)	psother485	1	1287	1287	_	Homo sapiens	Centrosome	33323015	545	591	47	8.3	51.24	[7.2-9.0]; 50.78	4	37.16	[4.0-4.4]; 37.73	_	49.45	6.6	14.08	False	Folded	None	6	0.238	8.4	0.201	0.21158	0.037	_	0.200886	0.203999
Q15468	SCL-interrupting locus protein (TAL-1-interrupting locus protein)	psother485	1	1287	1287	_	Homo sapiens	Centrosome	33323015	668	689	22	8.8	54.88	[7.8-9.0]; 54.27	4	32.35	[4.0-4.4]; 33.3	_	49.67	5.2	22.53	False	Folded	None	5.1	0.283	8.8	0.19	0.210043	0.093	_	0.189918	0.264937
Q15468	SCL-interrupting locus protein (TAL-1-interrupting locus protein)	psother485	1	1287	1287	_	Homo sapiens	Centrosome	33323015	754	779	26	7.7	80	[6.6-9.0]; 79.14	4	51.26	[4.0-4.3]; 52.34	_	79.15	4	28.74	False	Folded	None	4.1	0.223	7.7	0.048	0.0515538	0.175	_	0.0483749	0.217384
Q15468	SCL-interrupting locus protein (TAL-1-interrupting locus protein)	psother485	1	1287	1287	_	Homo sapiens	Centrosome	33323015	801	827	27	9	129.53	[7.6-9.0]; 127.16	4	58.82	[4.0-4.3]; 61.62	_	117.05	3.5	70.71	True	F->U	4.55	4	0.109	9	-0.27	-0.223344	0.379	_	-0.270414	0.109491
Q15468	SCL-interrupting locus protein (TAL-1-interrupting locus protein)	psother485	1	1287	1287	_	Homo sapiens	Centrosome	33323015	897	931	35	6.9	54.12	[6.1-7.8]; 53.6	4	39.56	[4.0-4.3]; 40.05	_	54.08	4.6	14.56	False	Folded	None	4.7	0.24	7.3	0.118	0.118971	0.122	_	0.120068	0.213994
Q15468	SCL-interrupting locus protein (TAL-1-interrupting locus protein)	psother485	1	1287	1287	_	Homo sapiens	Centrosome	33323015	1128	1184	57	8.4	112.18	[6.9-9.0]; 110.96	4	61.25	[4.0-4.3]; 63.65	_	108.24	3.7	50.93	True	F->U	5.05	4	0.162	8.3	-0.144	-0.13056	0.306	_	-0.143557	0.161901
Q15468	SCL-interrupting locus protein (TAL-1-interrupting locus protein)	psother485	1	1287	1287	_	Homo sapiens	Centrosome	33323015	1228	1268	41	6.9	69.99	[6.2-7.8]; 69.11	4	45.64	[4.0-4.4]; 46.76	_	69.93	4.5	24.35	False	Folded	None	4.5	0.242	7.1	0.094	0.0937952	0.148	_	0.0944412	0.213578
Q15561	Transcriptional enhancer factor TEF-3 (TEA domain family member 4) (TEAD-4) (Transcription factor 13-like 1) (Transcription factor RTEF-1)	psother550	1	434	434	_	Homo sapiens	Transcriptional condensate	33606996	1	40	40	9	76.35	[7.6-9.0]; 74.88	4	33.68	[4.0-4.3]; 35.33	_	69.22	3.3	42.67	False	Folded	None	4	0.225	9	0.007	0.0277164	0.218	_	0.00669827	0.225449
Q15561	Transcriptional enhancer factor TEF-3 (TEA domain family member 4) (TEAD-4) (Transcription factor 13-like 1) (Transcription factor RTEF-1)	psother550	1	434	434	_	Homo sapiens	Transcriptional condensate	33606996	191	215	25	9	-50.4	[6.8-9.0]; -50.58	4	-58.97	[4.0-4.3]; -58.67	_	-50.94	1.8	8.57	False	Folded	None	4	0.605	9	0.549	0.551272	0.056	_	0.549211	0.604768
Q15643	Thyroid receptor-interacting protein 11 (TR-interacting protein 11) (TRIP-11) (Clonal evolution-related gene on chromosome 14 protein) (Golgi-associated microtubule-binding protein 210) (GMAP-210) (Trip230)	psother382	1	1979	1979	_	Homo sapiens	Golgin condensate	32668013	223	261	39	8.3	152.52	[7.2-9.0]; 151.54	4	118.97	[4.0-4.4]; 120.56	_	148.66	6.1	33.55	False	Unfolded	None	5.6	-0.069	8.3	-0.185	-0.16695	0.116	_	-0.18533	-0.128433
Q15643	Thyroid receptor-interacting protein 11 (TR-interacting protein 11) (TRIP-11) (Clonal evolution-related gene on chromosome 14 protein) (Golgi-associated microtubule-binding protein 210) (GMAP-210) (Trip230)	psother382	1	1979	1979	_	Homo sapiens	Golgin condensate	32668013	776	799	24	6.7	128.01	[6.0-7.7]; 126.85	4	96.43	[4.0-4.2]; 97.51	_	127.7	4.8	31.58	Possible Multitransition	Variable	[4.249999999999999; 4.849999999999997]	4.7	0.022	7	-0.135	-0.134794	0.157	_	-0.132426	-0.0166538
Q15643	Thyroid receptor-interacting protein 11 (TR-interacting protein 11) (TRIP-11) (Clonal evolution-related gene on chromosome 14 protein) (Golgi-associated microtubule-binding protein 210) (GMAP-210) (Trip230)	psother382	1	1979	1979	_	Homo sapiens	Golgin condensate	32668013	844	895	52	7.6	133.47	[6.6-8.9]; 132.05	4	88.37	[4.0-4.4]; 90.03	_	132.23	4.4	45.1	True	F->U	4.85	4.5	0.053	7.7	-0.183	-0.177056	0.236	_	-0.183002	0.0154146
Q15643	Thyroid receptor-interacting protein 11 (TR-interacting protein 11) (TRIP-11) (Clonal evolution-related gene on chromosome 14 protein) (Golgi-associated microtubule-binding protein 210) (GMAP-210) (Trip230)	psother382	1	1979	1979	_	Homo sapiens	Golgin condensate	32668013	905	934	30	6.3	116.62	[5.8-6.9]; 115.95	9	97.19	[4.0-9.0]; 98.24	_	114.46	6.1	19.43	False	Unfolded	None	9	-0.008	4	-0.088	-0.0614039	0.08	_	-0.0456119	-0.0076162
Q15643	Thyroid receptor-interacting protein 11 (TR-interacting protein 11) (TRIP-11) (Clonal evolution-related gene on chromosome 14 protein) (Golgi-associated microtubule-binding protein 210) (GMAP-210) (Trip230)	psother382	1	1979	1979	_	Homo sapiens	Golgin condensate	32668013	937	961	25	6.7	96.81	[6.0-7.4]; 96.0	4	74.19	[4.0-4.2]; 74.93	_	96.28	6.6	22.62	True	U->F	4.45	9	0.062	4	-0.035	0.0117003	0.097	_	0.013921	-0.0345762
Q15643	Thyroid receptor-interacting protein 11 (TR-interacting protein 11) (TRIP-11) (Clonal evolution-related gene on chromosome 14 protein) (Golgi-associated microtubule-binding protein 210) (GMAP-210) (Trip230)	psother382	1	1979	1979	_	Homo sapiens	Golgin condensate	32668013	1374	1397	24	7.6	145.72	[6.5-9.0]; 144.2	4	95.78	[4.0-4.3]; 97.63	_	144.61	4.2	49.94	True	F->U	4.45	4.2	0.037	7.7	-0.291	-0.283779	0.328	_	-0.290758	0.0158939
Q15643	Thyroid receptor-interacting protein 11 (TR-interacting protein 11) (TRIP-11) (Clonal evolution-related gene on chromosome 14 protein) (Golgi-associated microtubule-binding protein 210) (GMAP-210) (Trip230)	psother382	1	1979	1979	_	Homo sapiens	Golgin condensate	32668013	1875	1922	48	7.5	100.7	[6.4-8.4]; 100.1	4	81.05	[4.0-4.2]; 81.68	_	100.33	10.5	19.65	False	Unfolded	None	9	-0.025	7.3	-0.053	-0.0531458	0.028	_	-0.0533204	-0.0469973
Q15648	Mediator of RNA polymerase II transcription subunit 1 (Activator-recruited cofactor 205 kDa component) (ARC205) (Mediator complex subunit 1) (Peroxisome proliferator-activated receptor-binding protein) (PBP) (PPAR-binding protein) (Thyroid hormone receptor-associated protein complex 220 kDa component) (Trap220) (Thyroid receptor-interacting protein 2) (TR-interacting protein 2) (TRIP-2) (Vitamin …	psother364	948	1574	627	pH 7.5	Homo sapiens	Mediator condensate	32434105;30449618	948	1575	628	5.6	118.8	[4.7-6.3]; 117.9	9	94.28	[8.8-9.0]; 95.44	Middle	111.7	10.1	24.52	True	U->F	7.05	9	0.066	4	-0.06	-0.00107845	0.126	Folded	-0.0400479	0.066396
Q15648	Mediator of RNA polymerase II transcription subunit 1 (Activator-recruited cofactor 205 kDa component) (ARC205) (Mediator complex subunit 1) (Peroxisome proliferator-activated receptor-binding protein) (PBP) (PPAR-binding protein) (Thyroid hormone receptor-associated protein complex 220 kDa component) (Trap220) (Thyroid receptor-interacting protein 2) (TR-interacting protein 2) (TRIP-2) (Vitamin …	psother551	1	1581	1581	pH 7.5	Homo sapiens	Transcriptional condensate	33606996	536	571	36	4.1	16.07	[4.0-5.9]; 15.62	9	-1.22	[8.7-9.0]; -0.4	Middle	9.69	10.3	17.29	False	Folded	None	9	0.363	4	0.314	0.331233	0.049	Folded	0.313638	0.362841
Q15648	Mediator of RNA polymerase II transcription subunit 1 (Activator-recruited cofactor 205 kDa component) (ARC205) (Mediator complex subunit 1) (Peroxisome proliferator-activated receptor-binding protein) (PBP) (PPAR-binding protein) (Thyroid hormone receptor-associated protein complex 220 kDa component) (Trap220) (Thyroid receptor-interacting protein 2) (TR-interacting protein 2) (TRIP-2) (Vitamin …	psother551	1	1581	1581	pH 7.5	Homo sapiens	Transcriptional condensate	33606996	583	867	285	8.6	66.08	[7.4-9.0]; 65.27	4.3	38.31	[4.0-4.7]; 38.63	10% maximum solubility	61.75	4.8	27.77	False	Folded	None	4.6	0.274	8.7	0.149	0.166557	0.125	Folded	0.148894	0.268987
Q15648	Mediator of RNA polymerase II transcription subunit 1 (Activator-recruited cofactor 205 kDa component) (ARC205) (Mediator complex subunit 1) (Peroxisome proliferator-activated receptor-binding protein) (PBP) (PPAR-binding protein) (Thyroid hormone receptor-associated protein complex 220 kDa component) (Trap220) (Thyroid receptor-interacting protein 2) (TR-interacting protein 2) (TRIP-2) (Vitamin …	psother551	1	1581	1581	pH 7.5	Homo sapiens	Transcriptional condensate	33606996	874	901	28	9	96.87	[7.8-9.0]; 94.36	4	32.04	[4.0-4.4]; 35.19	Middle	83.27	3.3	64.83	True	F->U	5.45	4	0.194	9	-0.152	-0.101205	0.346	Unfolded	-0.152469	0.193523
Q15648	Mediator of RNA polymerase II transcription subunit 1 (Activator-recruited cofactor 205 kDa component) (ARC205) (Mediator complex subunit 1) (Peroxisome proliferator-activated receptor-binding protein) (PBP) (PPAR-binding protein) (Thyroid hormone receptor-associated protein complex 220 kDa component) (Trap220) (Thyroid receptor-interacting protein 2) (TR-interacting protein 2) (TRIP-2) (Vitamin …	psother551	1	1581	1581	pH 7.5	Homo sapiens	Transcriptional condensate	33606996	906	927	22	6.9	53.71	[6.1-8.1]; 53.07	4	35.61	[4.0-4.2]; 36.22	10% maximum solubility	53.7	4.3	18.1	False	Folded	None	4.2	0.278	7.2	0.166	0.1667	0.112	Folded	0.167009	0.273134
Q15648	Mediator of RNA polymerase II transcription subunit 1 (Activator-recruited cofactor 205 kDa component) (ARC205) (Mediator complex subunit 1) (Peroxisome proliferator-activated receptor-binding protein) (PBP) (PPAR-binding protein) (Thyroid hormone receptor-associated protein complex 220 kDa component) (Trap220) (Thyroid receptor-interacting protein 2) (TR-interacting protein 2) (TRIP-2) (Vitamin …	psother551	1	1581	1581	pH 7.5	Homo sapiens	Transcriptional condensate	33606996	940	1581	642	5.6	115.47	[4.7-6.3]; 114.58	9	91.66	[8.8-9.0]; 92.79	Middle	108.55	10.1	23.81	True	U->F	6.65	9	0.075	4	-0.046	0.00990933	0.121	Folded	-0.0271874	0.0748475
Q15691	Microtubule-associated protein RP/EB family member 1 (APC-binding protein EB1) (End-binding protein 1) (EB1)	psother432	1	268	268	_	Homo sapiens	_	32997736	151	194	44	6.6	63.47	[6.0-7.3]; 63.2	4	54.82	[4.0-9.0]; 55.23	_	63.22	11.4	8.65	False	Folded	None	9	0.167	4	0.115	0.127853	0.052	_	0.124559	0.115296
Q16236	Nuclear factor erythroid 2-related factor 2 (NF-E2-related factor 2) (NFE2-related factor 2) (Nrf-2) (HEBP1) (Nuclear factor; erythroid derived 2; like 2)	psother124	1	605	605	_	Homo sapiens	_	30126895	333	457	125	8.2	90.21	[6.8-9.0]; 89.51	4	62.52	[4.0-4.6]; 63.47	_	88.46	4.6	27.69	False	Folded	None	4.6	0.175	8.2	0.019	0.0285819	0.156	_	0.0193734	0.148407
Q17RY0	Cytoplasmic polyadenylation element-binding protein 4 (CPE-BP4) (CPE-binding protein 4) (hCPEB-4)	psother147	1	729	729	_	Homo sapiens	_	30826453;27802129	16	51	36	4	37.23	[4.0-5.2]; 36.55	9	12.72	[8.4-9.0]; 13.88	_	20.66	13.6	24.51	False	Folded	None	9	0.312	4	0.094	0.27304	0.218	_	0.0944146	0.311632
Q17RY0	Cytoplasmic polyadenylation element-binding protein 4 (CPE-BP4) (CPE-binding protein 4) (hCPEB-4)	psother147	1	729	729	_	Homo sapiens	_	30826453;27802129	53	140	88	6.9	85.77	[6.2-7.8]; 84.89	4	58.78	[4.0-4.4]; 59.62	_	85.73	4.3	26.99	False	Folded	None	4.3	0.175	7	0.013	0.0128742	0.162	_	0.0130291	0.156635
Q17RY0	Cytoplasmic polyadenylation element-binding protein 4 (CPE-BP4) (CPE-binding protein 4) (hCPEB-4)	psother147	1	729	729	_	Homo sapiens	_	30826453;27802129	144	165	22	9	57.19	[7.9-9.0]; 56.19	4	34.06	[4.0-4.4]; 35.05	_	51.91	1.8	23.13	False	Folded	None	4	0.252	9	0.115	0.139251	0.137	_	0.1153	0.252152
Q17RY0	Cytoplasmic polyadenylation element-binding protein 4 (CPE-BP4) (CPE-binding protein 4) (hCPEB-4)	psother147	1	729	729	_	Homo sapiens	_	30826453;27802129	217	334	118	4	57.61	[4.0-5.3]; 57.12	9	39.67	[8.3-9.0]; 40.64	_	44	12.5	17.94	False	Folded	None	9	0.211	4	0.054	0.186941	0.157	_	0.0543645	0.211057
Q21049	Liprin-alpha (LAR-interacting protein alpha) (Synapse defective protein 2)	psself279	517	843	327	_	Caenorhabditis elegans	Presynaptic active zone condensate	33208945	517	538	22	4	39.51	[4.0-5.2]; 39.13	9	27.86	[8.6-9.0]; 28.4	_	31.12	13.8	11.65	False	Folded	None	9	0.269	4	0.142	0.250568	0.127	_	0.141886	0.269111
Q21049	Liprin-alpha (LAR-interacting protein alpha) (Synapse defective protein 2)	psself279	517	843	327	_	Caenorhabditis elegans	Presynaptic active zone condensate	33208945	551	589	39	7.9	85.86	[6.7-8.8]; 85.14	4	64.4	[4.0-4.3]; 65.22	_	84.76	7	21.46	False	Folded	None	4.8	0.123	7.8	0.085	0.0881259	0.038	_	0.0846277	0.10498
Q21049	Liprin-alpha (LAR-interacting protein alpha) (Synapse defective protein 2)	psself279	517	843	327	_	Caenorhabditis elegans	Presynaptic active zone condensate	33208945	605	666	62	9	57.93	[8.2-9.0]; 56.79	4	30.9	[4.0-4.4]; 32.13	_	48.65	3.7	27.03	False	Folded	None	4	0.271	9	0.135	0.171144	0.136	_	0.135067	0.271407
Q21049	Liprin-alpha (LAR-interacting protein alpha) (Synapse defective protein 2)	psself279	517	843	327	_	Caenorhabditis elegans	Presynaptic active zone condensate	33208945	671	741	71	8.2	110.84	[7.1-8.9]; 109.96	4	85.79	[4.0-4.4]; 86.88	_	108	8.8	25.05	False	Non-confident transition	None	5	0.017	4	-0.012	0.00708297	0.029	_	0.000695396	-0.0115153
Q21049	Liprin-alpha (LAR-interacting protein alpha) (Synapse defective protein 2)	psself279	517	843	327	_	Caenorhabditis elegans	Presynaptic active zone condensate	33208945	757	799	43	7.3	116.05	[6.4-8.2]; 115.44	4	95.62	[4.0-4.3]; 96.47	_	115.88	9.8	20.43	False	Non-confident transition	None	4.8	0.002	7.7	-0.044	-0.0406338	0.046	_	-0.0426884	-0.0185855
Q21049	Liprin-alpha (LAR-interacting protein alpha) (Synapse defective protein 2)	psself279	517	843	327	_	Caenorhabditis elegans	Presynaptic active zone condensate	33208945	820	844	25	8.5	129.53	[7.2-9.0]; 128.23	4	80.02	[4.0-4.3]; 82.27	_	123.88	3.9	49.51	True	F->U	4.85	4	0.118	8.6	-0.168	-0.141737	0.286	_	-0.167492	0.117647
Q21126	Uncharacterized protein	psother25	1	636	636	_	Caenorhabditis elegans	P granule	25535836	1	62	62	5.5	86.26	[5.0-5.9]; 86.09	9	81.76	[9.0-9.0]; 81.76	_	84.22	12.2	4.5	True	U->F	5.75	9	0.066	4	-0.037	0.0490412	0.103	_	-0.00764833	0.0663831
Q21126	Uncharacterized protein	psother25	1	636	636	_	Caenorhabditis elegans	P granule	25535836	239	375	137	5.4	57.87	[4.9-5.8]; 57.72	9	54.23	[8.9-9.0]; 54.36	_	55.4	9.6	3.64	False	Folded	None	9	0.192	4	0.123	0.185143	0.069	_	0.144626	0.192225
Q21126	Uncharacterized protein	psother25	1	636	636	_	Caenorhabditis elegans	P granule	25535836	483	506	24	8.2	108.66	[7.1-8.9]; 107.71	4	81.93	[4.0-4.3]; 82.93	_	105.58	10.1	26.73	False	Non-confident transition	None	4.7	0.036	8.1	-0.017	-0.00886905	0.053	_	-0.0173318	0.0213752
Q21126	Uncharacterized protein	psother25	1	636	636	_	Caenorhabditis elegans	P granule	25535836	514	552	39	6.8	58.46	[6.1-7.6]; 57.96	4	43.07	[4.0-4.3]; 43.8	_	58.34	5.7	15.39	False	Folded	None	5.2	0.219	6.9	0.186	0.186562	0.033	_	0.186349	0.190368
Q21126	Uncharacterized protein	psother25	1	636	636	_	Caenorhabditis elegans	P granule	25535836	558	636	79	8.4	101.72	[6.9-9.0]; 100.48	4	55.15	[4.0-4.2]; 56.83	_	97.92	3.9	46.57	True	F->U	5.75	4	0.199	8.5	-0.077	-0.0600041	0.276	_	-0.0764857	0.199222
Q21351	Ras-Gtpase-activating protein SH3 (Three) domain-Binding Protein	psother218	1	473	473	_	Caenorhabditis elegans	Neuronal granule	31378567	153	327	175	5.6	105.15	[4.3-6.3]; 104.09	9	80.61	[8.8-9.0]; 81.69	_	98.3	9.8	24.54	True	U->F	6.45	9	0.09	4	-0.063	0.0200453	0.153	_	-0.0278027	0.0902906
Q21351	Ras-Gtpase-activating protein SH3 (Three) domain-Binding Protein	psother218	1	473	473	_	Caenorhabditis elegans	Neuronal granule	31378567	421	473	53	7.9	76.04	[7.1-8.4]; 75.77	4	67.83	[4.0-4.4]; 68.14	_	75.17	13	8.21	False	Folded	None	9	0.055	7.7	0.038	0.040266	0.017	_	0.0382154	0.0457193
Q24168	Origin recognition complex subunit 2 (DmORC2)	psother275	1	618	618	_	Drosophila melanogaster	_	31560342	1	123	123	7.2	123.47	[6.4-8.3]; 122.31	4	89.32	[4.0-4.5]; 90.0	_	123.4	4.4	34.15	True	F->U	5.15	4.5	0.077	7.3	-0.108	-0.106816	0.185	_	-0.108106	0.0431373
Q24168	Origin recognition complex subunit 2 (DmORC2)	psother275	1	618	618	_	Drosophila melanogaster	_	31560342	127	273	147	6.7	94.41	[6.0-7.5]; 93.98	4	81.75	[4.0-4.3]; 82.25	_	94.21	10.1	12.66	False	Folded	None	9	0.062	6.5	0.023	0.0237928	0.039	_	0.0227177	0.0278626
Q32P51	Heterogeneous nuclear ribonucleoprotein A1-like 2 (hnRNP A1-like 2) (hnRNP core protein A1-like 2)	psself111	1	320	320	_	Homo sapiens	_	29961577	71	97	27	7.1	128.36	[6.2-8.1]; 127.78	4	109.19	[4.0-4.2]; 109.84	_	128.33	11.4	19.17	False	Unfolded	None	9	-0.096	4	-0.163	-0.133834	0.067	_	-0.133224	-0.163152
Q32P51	Heterogeneous nuclear ribonucleoprotein A1-like 2 (hnRNP A1-like 2) (hnRNP core protein A1-like 2)	psself111	1	320	320	_	Homo sapiens	_	29961577	178	211	34	6.4	105.53	[5.6-7.2]; 105.09	9	93.3	[8.9-9.0]; 93.9	_	104.87	12.7	12.23	False	Unfolded	None	9	-0.08	4	-0.128	-0.122963	0.048	_	-0.125301	-0.0797557
Q32P51	Heterogeneous nuclear ribonucleoprotein A1-like 2 (hnRNP A1-like 2) (hnRNP core protein A1-like 2)	psself111	1	320	320	_	Homo sapiens	_	29961577	265	298	34	4	37.57	[4.0-5.9]; 37.17	9	21.34	[8.8-9.0]; 21.97	_	31.99	10.2	16.23	False	Folded	None	9	0.244	4	0.18	0.201923	0.064	_	0.180458	0.244496
Q3KPK4	Borealin (Cell division cycle-associated protein 8) (Dasra-B) (DasraB) (xDasraB)	psother247	1	279	279	_	Xenopus laevis	_	31481798	140	184	45	5.1	130.53	[4.0-6.3]; 129.74	9	92.24	[8.8-9.0]; 94.12	_	120.37	13.1	38.29	False	Unfolded	None	9	-0.159	4	-0.316	-0.265064	0.157	_	-0.306194	-0.159229
Q3TKT4	Transcription activator BRG1 (EC 3.6.4.-) (ATP-dependent helicase SMARCA4) (BRG1-associated factor 190A) (BAF190A) (Protein brahma homolog 1) (SNF2-beta) (SWI/SNF-related matrix-associated actin-dependent regulator of chromatin subfamily A member 4)	psother455	1	1613	1613	_	Mus musculus	_	33159853	1	368	368	4	25.52	[4.0-5.7]; 25.28	9	17.77	[8.8-9.0]; 18.09	_	20.99	9.8	7.75	False	Folded	None	9	0.344	4	0.294	0.330214	0.05	_	0.294003	0.343895
Q3TKT4	Transcription activator BRG1 (EC 3.6.4.-) (ATP-dependent helicase SMARCA4) (BRG1-associated factor 190A) (BAF190A) (Protein brahma homolog 1) (SNF2-beta) (SWI/SNF-related matrix-associated actin-dependent regulator of chromatin subfamily A member 4)	psother455	1	1613	1613	_	Mus musculus	_	33159853	500	531	32	6.4	159.62	[5.7-7.0]; 158.58	9	129.35	[8.9-9.0]; 130.38	_	157.21	10.3	30.27	False	Unfolded	None	9	-0.145	4	-0.318	-0.248519	0.173	_	-0.262468	-0.145012
Q3TKT4	Transcription activator BRG1 (EC 3.6.4.-) (ATP-dependent helicase SMARCA4) (BRG1-associated factor 190A) (BAF190A) (Protein brahma homolog 1) (SNF2-beta) (SWI/SNF-related matrix-associated actin-dependent regulator of chromatin subfamily A member 4)	psother455	1	1613	1613	_	Mus musculus	_	33159853	571	707	137	7	107.39	[6.2-8.0]; 106.03	4	67.18	[4.0-4.4]; 67.84	_	107.39	4.3	40.21	True	F->U	5.75	4.3	0.167	7.1	-0.052	-0.0521305	0.219	_	-0.0521305	0.141514
Q3TKT4	Transcription activator BRG1 (EC 3.6.4.-) (ATP-dependent helicase SMARCA4) (BRG1-associated factor 190A) (BAF190A) (Protein brahma homolog 1) (SNF2-beta) (SWI/SNF-related matrix-associated actin-dependent regulator of chromatin subfamily A member 4)	psother455	1	1613	1613	_	Mus musculus	_	33159853	1291	1312	22	7.2	178.06	[6.4-8.1]; 176.63	4	133.23	[4.0-4.3]; 134.89	_	177.92	10.1	44.83	False	Unfolded	None	5	-0.228	7.1	-0.293	-0.293205	0.065	_	-0.293317	-0.291059
Q3TKT4	Transcription activator BRG1 (EC 3.6.4.-) (ATP-dependent helicase SMARCA4) (BRG1-associated factor 190A) (BAF190A) (Protein brahma homolog 1) (SNF2-beta) (SWI/SNF-related matrix-associated actin-dependent regulator of chromatin subfamily A member 4)	psother455	1	1613	1613	_	Mus musculus	_	33159853	1324	1348	25	7.5	158.13	[6.5-8.7]; 156.5	4	105.47	[4.0-4.3]; 107.31	_	157.1	4.6	52.66	False	Unfolded	None	4.6	-0.01	7.7	-0.287	-0.279318	0.277	_	-0.28659	-0.0695327
Q3TKT4	Transcription activator BRG1 (EC 3.6.4.-) (ATP-dependent helicase SMARCA4) (BRG1-associated factor 190A) (BAF190A) (Protein brahma homolog 1) (SNF2-beta) (SWI/SNF-related matrix-associated actin-dependent regulator of chromatin subfamily A member 4)	psother455	1	1613	1613	_	Mus musculus	_	33159853	1366	1430	65	6.1	173.49	[5.4-6.8]; 172.23	9	135.2	[8.9-9.0]; 136.37	_	168.65	10.5	38.29	False	Unfolded	None	9	-0.228	4	-0.396	-0.351086	0.168	_	-0.369035	-0.228446
Q3TKT4	Transcription activator BRG1 (EC 3.6.4.-) (ATP-dependent helicase SMARCA4) (BRG1-associated factor 190A) (BAF190A) (Protein brahma homolog 1) (SNF2-beta) (SWI/SNF-related matrix-associated actin-dependent regulator of chromatin subfamily A member 4)	psother455	1	1613	1613	_	Mus musculus	_	33159853	1529	1564	36	7.2	206.18	[6.4-8.6]; 203.14	4	120.95	[4.0-4.3]; 124.88	_	205.72	3.8	85.23	False	Unfolded	None	4	-0.051	7.4	-0.648	-0.644306	0.597	_	-0.647644	-0.0512531
Q3TKT4	Transcription activator BRG1 (EC 3.6.4.-) (ATP-dependent helicase SMARCA4) (BRG1-associated factor 190A) (BAF190A) (Protein brahma homolog 1) (SNF2-beta) (SWI/SNF-related matrix-associated actin-dependent regulator of chromatin subfamily A member 4)	psother455	1	1613	1613	_	Mus musculus	_	33159853	1572	1613	42	8.4	203.46	[7.2-9.0]; 201.62	4	135.55	[4.0-4.4]; 138.13	_	195.49	4.4	67.91	False	Unfolded	None	4.3	-0.089	8.4	-0.407	-0.37443	0.318	_	-0.406765	-0.11693
Q495M9	Usher syndrome type-1G protein (Scaffold protein containing ankyrin repeats and SAM domain)	psother287	1	461	461	_	Homo sapiens	Receptor cluster	31644917	204	238	35	5.9	141.29	[5.0-6.6]; 140.02	9	104.28	[8.9-9.0]; 105.3	_	134.36	11.4	37.01	False	Unfolded	None	9	-0.123	4	-0.34	-0.252909	0.217	_	-0.298134	-0.122757
Q495M9	Usher syndrome type-1G protein (Scaffold protein containing ankyrin repeats and SAM domain)	psother287	1	461	461	_	Homo sapiens	Receptor cluster	31644917	283	306	24	9	109.28	[7.9-9.0]; 107.82	4	68.14	[4.0-4.4]; 69.77	_	99.13	4.5	41.14	True	F->U	6.35	4.4	0.169	9	-0.077	-0.0352676	0.246	_	-0.0771914	0.148804
Q495M9	Usher syndrome type-1G protein (Scaffold protein containing ankyrin repeats and SAM domain)	psother287	1	461	461	_	Homo sapiens	Receptor cluster	31644917	332	366	35	9	121.4	[8.1-9.0]; 119.23	4	57.22	[4.0-4.4]; 59.98	_	101.96	3.8	64.18	True	F->U	5.75	4	0.158	9	-0.137	-0.06868	0.295	_	-0.137457	0.15803
Q4ACU6	SH3 and multiple ankyrin repeat domains protein 3 (Shank3) (Proline-rich synapse-associated protein 2) (ProSAP2) (SPANK-2)	psother118	1294	1323	30	pH 8.2	Mus musculus	Postsynaptic density	30078712	1294	1324	31	8.4	42.06	[7.0-9.0]; 40.93	4	-8.42	[4.0-4.3]; -6.61	10% maximum solubility	37.72	3.7	50.48	False	Folded	None	4	0.42	8.4	0.112	0.12897	0.308	Folded	0.112291	0.419773
Q4ACU6	SH3 and multiple ankyrin repeat domains protein 3 (Shank3) (Proline-rich synapse-associated protein 2) (ProSAP2) (SPANK-2)	psother118	1400	1426	27	pH 8.2	Mus musculus	Postsynaptic density	30078712	1400	1427	28	5.4	34.09	[4.0-6.2]; 32.57	9	-6.06	[8.8-9.0]; -4.55	Middle	22.09	10.2	40.15	False	Folded	None	9	0.344	4	0.141	0.233075	0.203	Folded	0.162946	0.343658
Q4ACU6	SH3 and multiple ankyrin repeat domains protein 3 (Shank3) (Proline-rich synapse-associated protein 2) (ProSAP2) (SPANK-2)	psother257	1	1730	1730	pH 8.2	Mus musculus	Postsynaptic density	31492534	345	469	125	6.9	74.21	[6.1-7.8]; 73.92	4	65.6	[4.0-4.3]; 65.91	Middle	74.2	11.4	8.61	False	Folded	None	9	0.122	4	0.091	0.100309	0.031	Folded	0.10018	0.0910735
Q4ACU6	SH3 and multiple ankyrin repeat domains protein 3 (Shank3) (Proline-rich synapse-associated protein 2) (ProSAP2) (SPANK-2)	psother257	1	1730	1730	pH 8.2	Mus musculus	Postsynaptic density	31492534	476	496	21	6.5	74.29	[5.9-7.2]; 73.79	4	60.63	[4.0-4.2]; 61.08	Middle	73.63	6.6	13.66	False	Folded	None	6	0.154	4	0.071	0.117147	0.083	Folded	0.129298	0.0709772
Q4ACU6	SH3 and multiple ankyrin repeat domains protein 3 (Shank3) (Proline-rich synapse-associated protein 2) (ProSAP2) (SPANK-2)	psother257	1	1730	1730	pH 8.2	Mus musculus	Postsynaptic density	31492534	667	694	28	6.8	113.51	[6.1-7.5]; 112.97	4	98.4	[4.0-9.0]; 99.19	Middle	113.35	12.4	15.11	False	Unfolded	None	9	-0.071	4	-0.13	-0.124917	0.059	Unfolded	-0.125817	-0.129755
Q4ACU6	SH3 and multiple ankyrin repeat domains protein 3 (Shank3) (Proline-rich synapse-associated protein 2) (ProSAP2) (SPANK-2)	psother257	1	1730	1730	pH 8.2	Mus musculus	Postsynaptic density	31492534	724	1025	302	7.4	62.6	[6.6-8.2]; 62.24	4.2	51.98	[4.0-4.8]; 52.24	10% maximum solubility	62.33	10.5	10.62	False	Folded	None	4.9	0.191	7.4	0.167	0.167338	0.024	Folded	0.166707	0.179485
Q4ACU6	SH3 and multiple ankyrin repeat domains protein 3 (Shank3) (Proline-rich synapse-associated protein 2) (ProSAP2) (SPANK-2)	psother257	1	1730	1730	pH 8.2	Mus musculus	Postsynaptic density	31492534	1040	1103	64	7.8	19.73	[6.5-8.5]; 19.49	4	12	[4.0-4.2]; 12.25	10% maximum solubility	19.47	10.1	7.73	False	Folded	None	9	0.334	4	0.323	0.326738	0.011	Folded	0.32592	0.322629
Q4ACU6	SH3 and multiple ankyrin repeat domains protein 3 (Shank3) (Proline-rich synapse-associated protein 2) (ProSAP2) (SPANK-2)	psother257	1	1730	1730	pH 8.2	Mus musculus	Postsynaptic density	31492534	1105	1201	97	7.8	69.04	[6.7-8.6]; 68.41	4	49.97	[4.0-4.4]; 50.69	10% maximum solubility	68.15	10.1	19.07	False	Folded	None	4.9	0.163	7.8	0.129	0.13245	0.034	Folded	0.129119	0.141158
Q4ACU6	SH3 and multiple ankyrin repeat domains protein 3 (Shank3) (Proline-rich synapse-associated protein 2) (ProSAP2) (SPANK-2)	psother257	1	1730	1730	pH 8.2	Mus musculus	Postsynaptic density	31492534	1207	1463	257	8	53.17	[6.6-9.0]; 52.44	4.3	22.88	[4.0-4.4]; 23.56	10% maximum solubility	51.95	4.3	30.29	False	Folded	None	4.3	0.322	8	0.171	0.176779	0.151	Folded	0.170905	0.322353
Q4ACU6	SH3 and multiple ankyrin repeat domains protein 3 (Shank3) (Proline-rich synapse-associated protein 2) (ProSAP2) (SPANK-2)	psother257	1	1730	1730	pH 8.2	Mus musculus	Postsynaptic density	31492534	1476	1525	50	8.5	85.23	[7.2-9.0]; 84.05	4	40.43	[4.0-4.3]; 42.4	10% maximum solubility	80	4	44.8	False	Non-confident transition	None	4	0.229	8.4	-0.008	0.00727319	0.237	Folded	-0.008107	0.229383
Q4ACU6	SH3 and multiple ankyrin repeat domains protein 3 (Shank3) (Proline-rich synapse-associated protein 2) (ProSAP2) (SPANK-2)	psother257	1	1730	1730	pH 8.2	Mus musculus	Postsynaptic density	31492534	1544	1592	49	6.7	61.71	[6.0-7.4]; 61.45	9	53.72	[9.0-9.0]; 53.72	Middle	61.57	12.2	7.99	False	Folded	None	9	0.114	4	0.072	0.0828413	0.042	Folded	0.0820168	0.114115
Q4ACU6	SH3 and multiple ankyrin repeat domains protein 3 (Shank3) (Proline-rich synapse-associated protein 2) (ProSAP2) (SPANK-2)	psother257	1	1730	1730	pH 8.2	Mus musculus	Postsynaptic density	31492534	1627	1661	35	5.1	59.56	[4.0-7.7]; 59.5	9	54	[9.0-9.0]; 54.0	Middle	59.46	14.5	5.56	False	Folded	None	9	0.083	4	0.064	0.0640451	0.019	Folded	0.0637264	0.0829201
Q503D7	RNA-binding motif protein 14a (Zgc:110682) (Zgc:110682 protein)	psother285	1	471	471	_	Danio rerio	_	31636951	270	296	27	9	54.11	[7.4-9.0]; 52.27	4	8.68	[4.0-4.4]; 10.76	_	47.33	1.8	45.43	False	Folded	None	4	0.306	9	0.039	0.0647057	0.267	_	0.0393956	0.305684
Q503D7	RNA-binding motif protein 14a (Zgc:110682) (Zgc:110682 protein)	psother285	1	471	471	_	Danio rerio	_	31636951	315	375	61	7.8	63.86	[6.7-8.5]; 63.35	4	47.18	[4.0-4.3]; 47.83	_	63.14	11.8	16.68	False	Folded	None	4.8	0.157	7.6	0.131	0.132625	0.026	_	0.131304	0.144491
Q503D7	RNA-binding motif protein 14a (Zgc:110682) (Zgc:110682 protein)	psother285	1	471	471	_	Danio rerio	_	31636951	400	471	72	8	17.81	[5.8-8.6]; 17.6	4	12.76	[4.0-4.2]; 12.95	_	17.54	8.8	5.05	False	Folded	None	9	0.364	4	0.303	0.355324	0.061	_	0.358012	0.303361
Q53GS7	Nucleoporin GLE1 (hGLE1) (GLE1-like protein)	psother529	1	698	698	_	Homo sapiens	_	33549703;30893049	59	121	63	7.4	61.66	[6.4-8.9]; 61.12	4	44.28	[4.0-4.4]; 45.02	_	61.49	4.4	17.38	False	Folded	None	4.4	0.259	7.7	0.151	0.153823	0.108	_	0.151657	0.244936
Q53GS7	Nucleoporin GLE1 (hGLE1) (GLE1-like protein)	psother529	1	698	698	_	Homo sapiens	_	33549703;30893049	186	207	22	6.5	147.55	[5.9-7.1]; 146.7	4	123.13	[4.0-9.0]; 124.25	_	146.09	8.8	24.42	False	Unfolded	None	9	-0.048	4	-0.195	-0.123029	0.147	_	-0.134083	-0.195213
Q53GS7	Nucleoporin GLE1 (hGLE1) (GLE1-like protein)	psother529	1	698	698	_	Homo sapiens	_	33549703;30893049	330	379	50	7.3	125.46	[6.4-8.5]; 124.29	4	89.4	[4.0-4.4]; 90.95	_	125.17	4.5	36.06	True	F->U	5.15	4.5	0.078	7.2	-0.093	-0.0925106	0.171	_	-0.0933628	0.0418201
Q53HL2	Borealin (Cell division cycle-associated protein 8) (Dasra-B) (hDasra-B) (Pluripotent embryonic stem cell-related gene 3 protein)	psother248	1	280	280	_	Homo sapiens	_	31481798	120	186	67	6.5	120.52	[5.9-7.1]; 119.73	9	96.63	[8.9-9.0]; 97.44	_	118.96	9.8	23.89	False	Non-confident transition	None	9	0.006	4	-0.143	-0.0896722	0.149	_	-0.0993108	0.00552243
Q54EQ8	Nuclear pore complex protein Nup98-Nup96 [Cleaved into: Nuclear pore complex protein Nup98 (Nucleoporin Nup98); Nuclear pore complex protein Nup96 (Nucleoporin Nup96)]	psself32	1	719	719	_	Dictyostelium discoideum	Nuclear pore complex	25562883;29424691	13	243	231	6.4	-0.68	[5.6-6.9]; -0.71	9	-1.48	[8.8-9.0]; -1.44	_	-0.78	7	0.8	False	Folded	None	9	0.416	4	0.411	0.413156	0.005	_	0.41265	0.415837
Q54EQ8	Nuclear pore complex protein Nup98-Nup96 [Cleaved into: Nuclear pore complex protein Nup98 (Nucleoporin Nup98); Nuclear pore complex protein Nup96 (Nucleoporin Nup96)]	psself32	1	719	719	_	Dictyostelium discoideum	Nuclear pore complex	25562883;29424691	268	662	395	4	11.12	[4.0-5.6]; 11.08	9	9.65	[8.8-9.0]; 9.7	_	10.39	10.3	1.47	False	Folded	None	9	0.376	4	0.37	0.373719	0.006	_	0.370196	0.376155
Q59X67	Enhanced filamentous growth protein 1	psself260	1	550	550	_	Candida albicans	Transcriptional condensate	33087900;32719507	11	57	47	9	37.62	[4.0-4.0]; 37.62	9	37.62	[4.0-4.0]; 37.62	_	37.62	7	0	False	Folded	None	4	0.277	4	0.277	0.276843	0	_	0.276843	0.276843
Q59X67	Enhanced filamentous growth protein 1	psself260	1	550	550	_	Candida albicans	Transcriptional condensate	33087900;32719507	65	105	41	8.7	66.12	[7.9-9.0]; 65.92	4	58.52	[4.0-4.5]; 58.86	_	63.92	7	7.6	False	Folded	None	4.5	0.175	8.8	0.153	0.161487	0.022	_	0.153139	0.17336
Q59X67	Enhanced filamentous growth protein 1	psself260	1	550	550	_	Candida albicans	Transcriptional condensate	33087900;32719507	107	210	104	5.2	25.63	[4.7-5.6]; 25.58	9	24.49	[9.0-9.0]; 24.49	_	24.77	10.1	1.14	False	Folded	None	9	0.304	4	0.286	0.303067	0.018	_	0.288436	0.303951
Q59X67	Enhanced filamentous growth protein 1	psself260	1	550	550	_	Candida albicans	Transcriptional condensate	33087900;32719507	324	550	227	4	53.83	[4.0-5.9]; 53.72	9	47.19	[8.8-9.0]; 47.43	_	51.15	9.2	6.64	False	Folded	None	9	0.232	4	0.195	0.216907	0.037	_	0.194969	0.231834
Q5A0W9	Zinc cluster transcription factor CZF1	psself261	1	385	385	_	Candida albicans	Transcriptional condensate	33087900;32719507	1	314	314	5.8	64.63	[4.0-6.6]; 64.23	9	56.12	[8.9-9.0]; 56.4	_	63.05	9.8	8.51	False	Folded	None	9	0.192	4	0.149	0.166345	0.043	_	0.158166	0.192148
Q5A0W9	Zinc cluster transcription factor CZF1	psself261	1	385	385	_	Candida albicans	Transcriptional condensate	33087900;32719507	343	371	29	6.5	111.95	[5.9-7.3]; 110.93	4	84.44	[4.0-4.2]; 85.43	_	110.85	5.7	27.51	Possible Multitransition	Variable	[4.249999999999999; 5.649999999999994]	5.1	0.029	6.9	-0.058	-0.0579182	0.087	_	-0.0519808	-0.0183968
Q5A791	Nrp1p	psother37	1	763	763	_	Candida albicans	Stress granule	26238190	421	535	115	4.5	99.84	[4.0-5.4]; 99.55	9	82.56	[8.3-9.0]; 83.45	_	87.43	9.6	17.28	True	U->F	5.95	9	0.095	4	-0.068	0.0687863	0.163	_	-0.0610986	0.0951421
Q5A791	Nrp1p	psother37	1	763	763	_	Candida albicans	Stress granule	26238190	571	595	25	4	40.89	[4.0-5.1]; 40.75	9	36.61	[7.2-9.0]; 36.7	_	37.14	10.5	4.28	False	Folded	None	9	0.275	4	0.222	0.269506	0.053	_	0.221734	0.274857
Q5A791	Nrp1p	psother37	1	763	763	_	Candida albicans	Stress granule	26238190	599	763	165	4.9	74.77	[4.0-5.6]; 74.6	9	64.17	[8.7-9.0]; 64.59	_	68.56	9.6	10.6	False	Folded	None	9	0.156	4	0.077	0.136601	0.079	_	0.0843784	0.156016
Q5A8T7	Agglutinin-like protein 5 (Adhesin 5)	psself71	20	1351	1332	_	Candida albicans	Adhesin nanodomain	29187516	406	433	28	9	26.9	[8.0-9.0]; 25.86	4	-3.84	[4.0-4.4]; -2.51	_	18.6	3.6	30.74	False	Folded	None	4	0.398	9	0.239	0.269914	0.159	_	0.238993	0.398285
Q5A8T7	Agglutinin-like protein 5 (Adhesin 5)	psself71	20	431	412	_	Candida albicans	Adhesin nanodomain	29187516	408	430	23	9	44.05	[8.1-9.0]; 43.0	4	14.12	[4.0-4.4]; 15.35	_	34.41	3.9	29.93	False	Folded	None	4	0.333	9	0.199	0.233804	0.134	_	0.198542	0.333389
Q5A8T7	Agglutinin-like protein 5 (Adhesin 5)	psself71	20	1351	1332	_	Candida albicans	Adhesin nanodomain	29187516	459	648	190	9	75.45	[7.2-9.0]; 74.04	4	32.64	[4.0-4.2]; 34.21	_	70.39	3.7	42.81	False	Folded	None	4	0.278	9	0.051	0.071011	0.227	_	0.0510559	0.27807
Q5A8T7	Agglutinin-like protein 5 (Adhesin 5)	psself71	20	1351	1332	_	Candida albicans	Adhesin nanodomain	29187516	700	728	29	9	103.91	[7.5-9.0]; 102.68	4	71.74	[4.0-4.4]; 73.23	_	98.98	1.8	32.17	True	F->U	4.95	4	0.087	9	-0.11	-0.0895427	0.197	_	-0.109778	0.0866994
Q5A8T7	Agglutinin-like protein 5 (Adhesin 5)	psself71	20	1351	1332	_	Candida albicans	Adhesin nanodomain	29187516	849	887	39	9	116.56	[8.0-9.0]; 114.66	4	69.77	[4.0-4.4]; 72.04	_	105.69	3.6	46.79	True	F->U	5.05	4	0.122	9	-0.185	-0.138409	0.307	_	-0.184785	0.12219
Q5A8T7	Agglutinin-like protein 5 (Adhesin 5)	psself71	20	1351	1332	_	Candida albicans	Adhesin nanodomain	29187516	908	965	58	9	74.64	[7.9-9.0]; 73.58	4	46.32	[4.0-4.3]; 47.44	_	68.3	3.3	28.32	False	Folded	None	4	0.216	9	0.067	0.0933443	0.149	_	0.0666589	0.216396
Q5A8T7	Agglutinin-like protein 5 (Adhesin 5)	psself71	20	1351	1332	_	Candida albicans	Adhesin nanodomain	29187516	975	1022	48	9	99.79	[7.9-9.0]; 98.52	4	66.81	[4.0-4.3]; 68.12	_	92.3	3.6	32.98	True	F->U	6.65	4	0.145	9	-0.046	-0.0112379	0.191	_	-0.0463105	0.145233
Q5A8T7	Agglutinin-like protein 5 (Adhesin 5)	psself71	20	1351	1332	_	Candida albicans	Adhesin nanodomain	29187516	1055	1263	209	8.4	73.7	[6.8-9.0]; 72.95	4	40.87	[4.0-4.2]; 42.27	_	71.59	3.9	32.83	False	Folded	None	4	0.253	8.4	0.085	0.0930633	0.168	_	0.0848445	0.25315
Q5ADX8	Wor4p	psself262	1	401	401	_	Candida albicans	Transcriptional condensate	33087900;32719507	1	75	75	6.6	72.01	[6.0-7.4]; 71.59	4	58.78	[4.0-4.3]; 59.36	_	71.74	4.8	13.23	False	Folded	None	4.8	0.173	6.4	0.136	0.138731	0.037	_	0.136115	0.157909
Q5ADX8	Wor4p	psself262	1	401	401	_	Candida albicans	Transcriptional condensate	33087900;32719507	115	179	65	7.8	75.95	[6.5-8.3]; 75.76	4	71.49	[4.0-4.2]; 71.66	_	75.69	12.5	4.46	False	Folded	None	9	0.106	4	0.076	0.0987471	0.03	_	0.0984069	0.0759138
Q5ADX8	Wor4p	psself262	1	401	401	_	Candida albicans	Transcriptional condensate	33087900;32719507	201	242	42	5.4	118.69	[4.1-6.1]; 117.16	9	81.08	[8.8-9.0]; 82.43	_	105.54	9.8	37.61	True	U->F	8.55	9	0.027	4	-0.261	-0.0814673	0.288	_	-0.212397	0.0271367
Q5ADX8	Wor4p	psself262	1	401	401	_	Candida albicans	Transcriptional condensate	33087900;32719507	257	304	48	8.8	68.92	[8.1-9.0]; 68.82	4	64.85	[4.0-4.3]; 65.0	_	67.27	7.9	4.07	False	Folded	None	6.9	0.163	4	0.152	0.163233	0.011	_	0.157581	0.151983
Q5ADX8	Wor4p	psself262	1	401	401	_	Candida albicans	Transcriptional condensate	33087900;32719507	310	401	92	8.7	32.47	[7.8-9.0]; 32.16	4	21.92	[4.0-4.5]; 22.41	_	29.76	5.2	10.55	False	Folded	None	4.6	0.33	8.8	0.291	0.302605	0.039	_	0.291188	0.326304
Q5AP80	White-opaque regulator 1	psself263	1	785	785	_	Candida albicans	Transcriptional condensate	33087900;32719507	94	148	55	5.9	130.91	[5.4-6.6]; 130.2	9	110.95	[8.9-9.0]; 111.62	_	127	9.6	19.96	False	Unfolded	None	9	-0.044	4	-0.161	-0.0922531	0.117	_	-0.129678	-0.0437425
Q5AP80	White-opaque regulator 1	psself263	1	785	785	_	Candida albicans	Transcriptional condensate	33087900;32719507	294	315	22	4	80.61	[4.0-5.1]; 79.95	9	60.81	[7.2-9.0]; 61.23	_	63.29	8.8	19.8	True	U->F	5.45	9	0.187	4	-0.055	0.162545	0.242	_	-0.0546015	0.186865
Q5AP80	White-opaque regulator 1	psself263	1	785	785	_	Candida albicans	Transcriptional condensate	33087900;32719507	359	422	64	8.5	65.54	[7.0-9.0]; 65.14	4	51.5	[4.0-4.4]; 52.0	_	64.18	4.6	14.04	False	Folded	None	4.6	0.2	8.5	0.109	0.117457	0.091	_	0.10915	0.188264
Q5AP80	White-opaque regulator 1	psself263	1	785	785	_	Candida albicans	Transcriptional condensate	33087900;32719507	430	462	33	9	47.33	[4.0-4.0]; 47.33	9	47.33	[4.0-4.0]; 47.33	_	47.33	7	0	False	Folded	None	4	0.228	4	0.228	0.228411	0	_	0.228411	0.228411
Q5AP80	White-opaque regulator 1	psself263	1	785	785	_	Candida albicans	Transcriptional condensate	33087900;32719507	469	496	28	9	39.98	[8.4-9.0]; 39.52	4	30	[4.0-4.4]; 30.39	_	35.71	5.2	9.98	False	Folded	None	4.8	0.292	9	0.228	0.246561	0.064	_	0.227752	0.288295
Q5AP80	White-opaque regulator 1	psself263	1	785	785	_	Candida albicans	Transcriptional condensate	33087900;32719507	503	630	128	4.7	67.36	[4.0-5.5]; 67.23	9	59.64	[8.7-9.0]; 60.0	_	62.94	10.1	7.72	False	Folded	None	9	0.162	4	0.109	0.147779	0.053	_	0.110707	0.162456
Q5AP80	White-opaque regulator 1	psself263	1	785	785	_	Candida albicans	Transcriptional condensate	33087900;32719507	632	785	154	9	51.44	[8.5-9.0]; 51.23	5.8	46.42	[4.0-5.9]; 46.72	_	48.96	6.3	5.02	False	Folded	None	5.8	0.245	9	0.205	0.216884	0.04	_	0.204694	0.245242
Q5BJ56	Fragile X mental retardation syndrome-related protein 1 homolog (XtFxr1p)	psself198	1	490	490	_	Xenopus tropicalis	_	32328638	376	491	116	7.5	151.12	[6.6-8.3]; 150.46	4	130.56	[4.0-4.5]; 131.35	_	150.54	11.4	20.56	False	Unfolded	None	4.9	-0.169	7.6	-0.216	-0.21338	0.047	_	-0.215961	-0.19598
Q5EWX9	Nuclear pore protein pom121	psself15	571	1050	480	_	Xenopus laevis	Nuclear pore complex	23202855;29424691	607	636	30	5.9	48.22	[5.1-6.6]; 47.52	9	26.64	[8.8-9.0]; 27.57	_	44.18	9.7	21.58	False	Folded	None	9	0.293	4	0.19	0.226119	0.103	_	0.209922	0.292684
Q5EWX9	Nuclear pore protein pom121	psself15	571	1050	480	_	Xenopus laevis	Nuclear pore complex	23202855;29424691	638	665	28	9	-30.21	[4.0-4.0]; -30.21	9	-30.21	[4.0-4.0]; -30.21	_	-30.21	7	0	False	Folded	None	4	0.519	4	0.519	0.519307	0	_	0.519307	0.519307
Q5EWX9	Nuclear pore protein pom121	psself15	571	1050	480	_	Xenopus laevis	Nuclear pore complex	23202855;29424691	670	698	29	6.3	-12.95	[5.8-6.9]; -13.21	9	-21.65	[8.9-9.0]; -21.4	_	-13.85	7	8.7	False	Folded	None	9	0.479	4	0.448	0.453451	0.031	_	0.450187	0.479409
Q5EWX9	Nuclear pore protein pom121	psself15	571	1050	480	_	Xenopus laevis	Nuclear pore complex	23202855;29424691	722	745	24	5.4	46.58	[4.0-6.2]; 45.77	9	24.58	[8.8-9.0]; 25.33	_	39.67	10.1	22	False	Folded	None	9	0.272	4	0.131	0.210698	0.141	_	0.154834	0.271669
Q5EWX9	Nuclear pore protein pom121	psself15	571	1050	480	_	Xenopus laevis	Nuclear pore complex	23202855;29424691	902	922	21	4	56.44	[4.0-5.9]; 56.07	9	42.76	[8.7-9.0]; 43.41	_	51.39	12.2	13.68	False	Folded	None	9	0.221	4	0.17	0.18863	0.051	_	0.170185	0.221429
Q5EWX9	Nuclear pore protein pom121	psself15	571	1050	480	_	Xenopus laevis	Nuclear pore complex	23202855;29424691	937	977	41	5.9	20.46	[5.0-6.6]; 19.89	9	3.85	[8.8-9.0]; 4.55	_	17.28	9	16.61	False	Folded	None	9	0.356	4	0.284	0.306956	0.072	_	0.296343	0.355688
Q5EWX9	Nuclear pore protein pom121	psself15	571	1050	480	_	Xenopus laevis	Nuclear pore complex	23202855;29424691	983	1013	31	9	-3.58	[4.0-4.0]; -3.58	9	-3.58	[4.0-4.0]; -3.58	_	-3.58	7	0	False	Folded	None	4	0.434	4	0.434	0.434203	0	_	0.434203	0.434203
Q5EWX9	Nuclear pore protein pom121	psself15	571	1050	480	_	Xenopus laevis	Nuclear pore complex	23202855;29424691	1015	1050	36	4	115.26	[4.0-5.5]; 114.04	9	67.3	[8.8-9.0]; 69.03	_	93.33	13.8	47.96	False	Unfolded	None	9	-0.057	4	-0.339	-0.164168	0.282	_	-0.339428	-0.0568866
Q5T1M5	FK506-binding protein 15 (FKBP-15) (133 kDa FK506-binding protein) (133 kDa FKBP) (FKBP-133) (WASP- and FKBP-like protein) (WAFL)	psother209	1	1219	1219	_	Homo sapiens	_	31324804	41	68	28	4	58.33	[4.0-5.9]; 57.24	9	17.28	[8.7-9.0]; 19.23	_	43.18	10.6	41.05	False	Folded	None	9	0.213	4	0.058	0.113677	0.155	_	0.0578908	0.21284
Q5T1M5	FK506-binding protein 15 (FKBP-15) (133 kDa FK506-binding protein) (133 kDa FKBP) (FKBP-133) (WASP- and FKBP-like protein) (WAFL)	psother209	1	1219	1219	_	Homo sapiens	_	31324804	295	354	60	8.4	53.74	[7.2-9.0]; 53.13	4	34.01	[4.0-4.4]; 34.83	_	51.21	4.6	19.73	False	Folded	None	4.6	0.301	8.5	0.21	0.221369	0.091	_	0.210457	0.289715
Q5T1M5	FK506-binding protein 15 (FKBP-15) (133 kDa FK506-binding protein) (133 kDa FKBP) (FKBP-133) (WASP- and FKBP-like protein) (WAFL)	psother209	1	1219	1219	_	Homo sapiens	_	31324804	375	442	68	9	17.42	[8.1-9.0]; 16.47	4	-4.07	[4.0-4.3]; -3.26	_	11.53	3.8	21.49	False	Folded	None	4	0.4	9	0.274	0.296118	0.126	_	0.273531	0.400388
Q5T1M5	FK506-binding protein 15 (FKBP-15) (133 kDa FK506-binding protein) (133 kDa FKBP) (FKBP-133) (WASP- and FKBP-like protein) (WAFL)	psother209	1	1219	1219	_	Homo sapiens	_	31324804	481	512	32	8.8	-2.93	[7.8-9.0]; -3.28	4	-16.47	[4.0-4.4]; -15.93	_	-5.98	5.2	13.54	False	Folded	None	5.1	0.457	8.8	0.395	0.40884	0.062	_	0.394518	0.444516
Q5T1M5	FK506-binding protein 15 (FKBP-15) (133 kDa FK506-binding protein) (133 kDa FKBP) (FKBP-133) (WASP- and FKBP-like protein) (WAFL)	psother209	1	1219	1219	_	Homo sapiens	_	31324804	575	601	27	7	139.49	[6.3-7.9]; 138.0	4	95.49	[4.0-4.3]; 97.03	_	139.49	4.6	44	False	Non-confident transition	None	4.6	0.002	7	-0.197	-0.196721	0.199	_	-0.196721	-0.0578851
Q5T1M5	FK506-binding protein 15 (FKBP-15) (133 kDa FK506-binding protein) (133 kDa FKBP) (FKBP-133) (WASP- and FKBP-like protein) (WAFL)	psother209	1	1219	1219	_	Homo sapiens	_	31324804	606	646	41	6.8	109.41	[6.2-7.5]; 108.64	4	86.11	[4.0-4.4]; 87.17	_	109.18	4.8	23.3	Possible Multitransition	Variable	[6.049999999999993; 8.249999999999986]	5	0.069	6.9	-0.02	-0.0201286	0.089	_	-0.0199942	0.0178361
Q5T1M5	FK506-binding protein 15 (FKBP-15) (133 kDa FK506-binding protein) (133 kDa FKBP) (FKBP-133) (WASP- and FKBP-like protein) (WAFL)	psother209	1	1219	1219	_	Homo sapiens	_	31324804	652	676	25	5.8	96.96	[5.0-6.5]; 95.89	9	68.92	[8.8-9.0]; 69.99	_	90.11	8.8	28.04	True	U->F	5.55	9	0.158	4	-0.058	0.0770614	0.216	_	0.0109738	0.157939
Q5T1M5	FK506-binding protein 15 (FKBP-15) (133 kDa FK506-binding protein) (133 kDa FKBP) (FKBP-133) (WASP- and FKBP-like protein) (WAFL)	psother209	1	1219	1219	_	Homo sapiens	_	31324804	693	714	22	6.3	135.32	[5.6-6.9]; 134.07	9	101.2	[8.8-9.0]; 102.8	_	131.21	7	34.12	True	U->F	8.25	9	0.041	4	-0.125	-0.0654482	0.166	_	-0.0825378	0.0406374
Q5T1M5	FK506-binding protein 15 (FKBP-15) (133 kDa FK506-binding protein) (133 kDa FKBP) (FKBP-133) (WASP- and FKBP-like protein) (WAFL)	psother209	1	1219	1219	_	Homo sapiens	_	31324804	736	764	29	6.8	177.36	[6.2-7.5]; 175.98	4	133.31	[4.0-4.3]; 134.98	_	176.94	4.6	44.05	False	Unfolded	None	4.7	-0.123	6.7	-0.299	-0.29662	0.176	_	-0.298648	-0.192361
Q5T1M5	FK506-binding protein 15 (FKBP-15) (133 kDa FK506-binding protein) (133 kDa FKBP) (FKBP-133) (WASP- and FKBP-like protein) (WAFL)	psother209	1	1219	1219	_	Homo sapiens	_	31324804	859	887	29	6.5	121.02	[6.0-7.2]; 120.16	4	95.59	[4.0-4.3]; 96.72	_	119.8	4.8	25.43	Possible Multitransition	Variable	[4.1499999999999995; 5.149999999999996]	4.8	0.037	6.8	-0.078	-0.0768785	0.115	_	-0.0761687	-0.0120392
Q5T1M5	FK506-binding protein 15 (FKBP-15) (133 kDa FK506-binding protein) (133 kDa FKBP) (FKBP-133) (WASP- and FKBP-like protein) (WAFL)	psother209	1	1219	1219	_	Homo sapiens	_	31324804	925	1219	295	8.3	105.75	[6.7-9.0]; 104.35	4	50.03	[4.0-4.2]; 51.4	_	102.41	4	55.72	True	F->U	6.15	4	0.218	8.2	-0.044	-0.0322003	0.262	_	-0.0440219	0.218361
Q5T481	RNA-binding protein 20 (RNA-binding motif protein 20)	psother458	1	1227	1227	_	Homo sapiens	Stress granule	33188278	1	65	65	8.8	15.44	[7.8-9.0]; 14.91	4	-2.89	[4.0-4.5]; -2.13	_	10.86	4.4	18.33	False	Folded	None	4.3	0.404	8.7	0.329	0.34452	0.075	_	0.329369	0.399089
Q5T481	RNA-binding protein 20 (RNA-binding motif protein 20)	psother458	1	1227	1227	_	Homo sapiens	Stress granule	33188278	69	95	27	6.3	2.29	[5.7-7.0]; 2.14	4	-1.63	[4.0-9.0]; -1.45	_	1.91	7	3.92	False	Folded	None	4.5	0.421	6.6	0.413	0.413616	0.008	_	0.41364	0.418939
Q5T481	RNA-binding protein 20 (RNA-binding motif protein 20)	psother458	1	1227	1227	_	Homo sapiens	Stress granule	33188278	135	160	26	4	40.01	[4.0-5.1]; 39.46	9	21.96	[7.8-9.0]; 22.97	_	25.56	13.6	18.05	False	Folded	None	9	0.293	4	0.083	0.266641	0.21	_	0.0828098	0.29262
Q5T481	RNA-binding protein 20 (RNA-binding motif protein 20)	psother458	1	1227	1227	_	Homo sapiens	Stress granule	33188278	163	203	41	4	-10.22	[4.0-5.3]; -10.36	9	-14.74	[8.9-9.0]; -14.62	_	-12.72	14.5	4.52	False	Folded	None	9	0.398	4	0.36	0.388669	0.038	_	0.36021	0.398406
Q5T481	RNA-binding protein 20 (RNA-binding motif protein 20)	psother458	1	1227	1227	_	Homo sapiens	Stress granule	33188278	227	285	59	8.4	43.78	[6.8-9.0]; 43.31	4	25.59	[4.0-4.3]; 26.14	_	42.49	4.4	18.19	False	Folded	None	4.3	0.302	8.8	0.181	0.190861	0.121	_	0.181693	0.294933
Q5T481	RNA-binding protein 20 (RNA-binding motif protein 20)	psother458	1	1227	1227	_	Homo sapiens	Stress granule	33188278	287	371	85	8.1	44.07	[6.8-9.0]; 43.62	4	25.71	[4.0-4.5]; 26.4	_	43.01	4.6	18.36	False	Folded	None	4.6	0.314	8.2	0.203	0.209631	0.111	_	0.202883	0.29577
Q5T481	RNA-binding protein 20 (RNA-binding motif protein 20)	psother458	1	1227	1227	_	Homo sapiens	Stress granule	33188278	620	937	318	7.8	141.36	[6.8-8.8]; 140.28	4.5	104.69	[4.0-5.0]; 105.33	_	139.45	4.8	36.67	Possible Multitransition	Variable	[4.249999999999999; 5.149999999999996]	4.9	0.022	7.9	-0.129	-0.121356	0.151	_	-0.129442	0.011638
Q5T481	RNA-binding protein 20 (RNA-binding motif protein 20)	psother458	1	1227	1227	_	Homo sapiens	Stress granule	33188278	958	1103	146	7.9	87.88	[6.5-9.0]; 86.71	4	43.62	[4.0-4.2]; 45.07	_	86.43	4	44.26	False	Folded	None	4	0.248	7.9	0.008	0.0144233	0.24	_	0.00786258	0.248468
Q5VSY0	G kinase-anchoring protein 1 (cGMP-dependent protein kinase-anchoring protein of 42 kDa)	psself199	1	366	366	_	Homo sapiens	Postsynaptic density	32343131	12	120	109	6.2	128.71	[5.5-6.9]; 127.9	9	106.31	[8.9-9.0]; 107.05	_	126.15	10.1	22.4	False	Unfolded	None	9	-0.032	4	-0.161	-0.111938	0.129	_	-0.128505	-0.0316959
Q5VSY0	G kinase-anchoring protein 1 (cGMP-dependent protein kinase-anchoring protein of 42 kDa)	psself199	1	366	366	_	Homo sapiens	Postsynaptic density	32343131	143	186	44	5.9	152.55	[5.2-6.6]; 151.29	9	117.82	[8.9-9.0]; 118.74	_	145.48	9.6	34.73	False	Unfolded	None	9	-0.087	4	-0.328	-0.206825	0.241	_	-0.267852	-0.0872482
Q60838	Segment polarity protein dishevelled homolog DVL-2 (Dishevelled-2) (DSH homolog 2)	psother5	1	736	736	_	Mus musculus	_	16263762;29424691	91	255	165	8.2	112.82	[7.3-8.8]; 112.2	4	93.12	[4.0-4.6]; 93.76	_	109.8	7	19.7	False	Non-confident transition	None	5.1	0.025	4	-0.009	0.01234	0.034	_	-0.000783211	-0.00880864
Q60838	Segment polarity protein dishevelled homolog DVL-2 (Dishevelled-2) (DSH homolog 2)	psother5	1	736	736	_	Mus musculus	_	16263762;29424691	554	727	174	7.9	51.1	[7.0-8.5]; 50.91	4.1	45.65	[4.0-4.6]; 45.76	_	50.61	8.8	5.45	False	Folded	None	9	0.223	4	0.194	0.216716	0.029	_	0.216125	0.196266
Q60838	Segment polarity protein dishevelled homolog DVL-2 (Dishevelled-2) (DSH homolog 2)	psself1	1	114	114	_	Mus musculus	_	19048988;17529994	92	115	24	8.8	45.55	[7.3-9.0]; 44.41	4	8.99	[4.0-4.4]; 10.64	_	40.45	4	36.56	False	Folded	None	4.1	0.37	8.8	0.12	0.142525	0.25	_	0.119814	0.364284
Q61686	Chromobox protein homolog 5 (Heterochromatin protein 1 homolog alpha) (HP1 alpha)	psother338	1	191	191	pH 7.5	Mus musculus	Heterochromatin	32302539;32101700	73	110	38	6.1	185.13	[5.4-6.8]; 183.64	9	141.94	[8.9-9.0]; 143.14	Middle	179.15	10.1	43.19	False	Unfolded	None	9	-0.207	4	-0.401	-0.34503	0.194	Unfolded	-0.369151	-0.20707
Q62108	Disks large homolog 4 (Postsynaptic density protein 95) (PSD-95) (Synapse-associated protein 90) (SAP-90) (SAP90)	psother258	1	724	724	_	Mus musculus	Postsynaptic density	31492534	15	43	29	9	63.7	[8.1-9.0]; 61.62	4	17.41	[4.0-4.4]; 19.57	_	50.77	3.8	46.29	False	Folded	None	4	0.324	9	0.023	0.0762462	0.301	_	0.0226927	0.324193
Q62108	Disks large homolog 4 (Postsynaptic density protein 95) (PSD-95) (Synapse-associated protein 90) (SAP-90) (SAP90)	psother258	20	724	705	_	Mus musculus	Postsynaptic density	31492534	20	46	27	9	27.97	[8.0-9.0]; 27.02	4	5.57	[4.0-4.4]; 6.46	_	22.77	4.4	22.4	False	Folded	None	4.3	0.382	9	0.201	0.226266	0.181	_	0.201451	0.369563
Q64337	Sequestosome-1 (STONE14) (Ubiquitin-binding protein p62)	psother125	1	442	442	_	Mus musculus	_	30126895	198	242	45	8.2	40.78	[6.9-9.0]; 40.01	4	14.42	[4.0-4.4]; 15.38	_	38.71	4.4	26.36	False	Folded	None	4.4	0.336	8.3	0.2	0.210614	0.136	_	0.200012	0.320535
Q64337	Sequestosome-1 (STONE14) (Ubiquitin-binding protein p62)	psother125	1	442	442	_	Mus musculus	_	30126895	248	403	156	8.2	88.53	[6.7-9.0]; 87.57	4	45	[4.0-4.2]; 46.74	_	86.25	3.9	43.53	False	Non-confident transition	None	4	0.236	8.2	-0.002	0.0064925	0.238	_	-0.00210033	0.235787
Q64337	Sequestosome-1 (STONE14) (Ubiquitin-binding protein p62)	psother227	246	300	55	_	Mus musculus	p62 cluster	31434890	246	301	56	8.1	88.79	[6.7-9.0]; 87.95	4	58.7	[4.0-4.4]; 59.99	_	87.18	4.4	30.09	False	Folded	None	4.3	0.166	7.9	0.007	0.0126478	0.159	_	0.00750394	0.150784
Q68FF6	ARF GTPase-activating protein GIT1 (ARF GAP GIT1) (G protein-coupled receptor kinase-interactor 1) (GRK-interacting protein 1)	psself241	1	770	770	_	Mus musculus	_	32780989	364	431	68	9	136.53	[7.9-9.0]; 134.06	4	70.71	[4.0-4.3]; 73.2	_	119.84	3.8	65.82	True	F->U	4.85	4	0.116	9	-0.232	-0.162752	0.348	_	-0.232188	0.116069
Q68FF6	ARF GTPase-activating protein GIT1 (ARF GAP GIT1) (G protein-coupled receptor kinase-interactor 1) (GRK-interacting protein 1)	psself241	1	770	770	_	Mus musculus	_	32780989	447	545	99	6.7	69.17	[6.0-7.6]; 68.9	4	60.55	[4.0-4.3]; 60.88	_	69.08	10.1	8.62	False	Folded	None	9	0.154	4	0.086	0.126376	0.068	_	0.123635	0.0856711
Q68FF6	ARF GTPase-activating protein GIT1 (ARF GAP GIT1) (G protein-coupled receptor kinase-interactor 1) (GRK-interacting protein 1)	psself241	1	770	770	_	Mus musculus	_	32780989	576	614	39	8.5	101.38	[7.4-9.0]; 100.7	4	78.72	[4.0-4.4]; 79.78	_	97.81	5.2	22.66	True	F->U	6.45	5.2	0.064	8.4	-0.03	-0.0150483	0.094	_	-0.0296265	0.0422141
Q6DEC7	LOC503671 protein	psself17	68	285	218	_	Xenopus laevis	Nuclear pore complex	23202855;29424691	108	139	32	6	62.17	[5.2-6.7]; 61.53	9	42.89	[8.8-9.0]; 43.84	_	59.02	10.3	19.28	False	Folded	None	9	0.184	4	0.09	0.119275	0.094	_	0.106156	0.18388
Q6DEC7	LOC503671 protein	psself17	68	285	218	_	Xenopus laevis	Nuclear pore complex	23202855;29424691	190	212	23	7.7	73.96	[6.5-9.0]; 73.32	4	50.47	[4.0-4.3]; 51.56	_	73.39	3.7	23.49	False	Folded	None	4	0.211	7.7	0.06	0.0619794	0.151	_	0.0597348	0.211304
Q6DEC7	LOC503671 protein	psself17	68	285	218	_	Xenopus laevis	Nuclear pore complex	23202855;29424691	229	252	24	6.3	25.08	[5.8-6.9]; 24.67	9	11.48	[4.0-9.0]; 12.11	_	23.68	7	13.6	False	Folded	None	9	0.352	6.4	0.31	0.314368	0.042	_	0.310505	0.351757
Q6NUF4	Targeting protein for Xklp2-A	psself181	1	716	716	_	Xenopus laevis	_	31937751	27	213	187	5.8	108.48	[4.9-6.5]; 107.47	9	81.38	[8.9-9.0]; 82.08	_	102.6	9.8	27.1	True	U->F	7.55	9	0.065	4	-0.09	-0.0192718	0.155	_	-0.0555322	0.0647839
Q6NUF4	Targeting protein for Xklp2-A	psself181	1	716	716	_	Xenopus laevis	_	31937751	230	292	63	6	101.97	[5.4-6.7]; 101.23	9	80.11	[8.9-9.0]; 80.81	_	98.35	9.8	21.86	True	U->F	6.35	9	0.096	4	-0.052	0.023271	0.148	_	-0.00979205	0.0963961
Q6NUF4	Targeting protein for Xklp2-A	psself181	1	716	716	_	Xenopus laevis	_	31937751	312	355	44	5.2	108.47	[4.0-6.2]; 107.48	9	66.06	[8.8-9.0]; 67.96	_	96.04	12.2	42.41	True	U->F	8.65	9	0.028	4	-0.203	-0.092716	0.231	_	-0.179087	0.028469
Q6NUF4	Targeting protein for Xklp2-A	psself181	319	716	398	_	Xenopus laevis	_	31937751	319	349	31	5.4	85.45	[4.0-6.3]; 84.07	9	42.04	[8.8-9.0]; 43.86	_	73.45	11.4	43.41	True	U->F	6.85	9	0.133	4	-0.095	0.00867849	0.228	_	-0.0626927	0.133392
Q6NV05	RNA-binding motif protein 14b (Zgc:85696)	psself164	1	556	556	_	Danio rerio	_	31636951	393	413	21	7.2	157.72	[6.4-8.0]; 157.3	4	143.31	[4.0-4.3]; 143.98	_	157.66	12.5	14.41	False	Unfolded	None	9	-0.256	7.2	-0.291	-0.290609	0.035	_	-0.290787	-0.281387
Q6NV05	RNA-binding motif protein 14b (Zgc:85696)	psself164	1	556	556	_	Danio rerio	_	31636951	527	549	23	6.4	37.78	[5.9-7.1]; 37.41	4	25.24	[4.0-4.2]; 25.64	_	37.06	8.8	12.54	False	Folded	None	9	0.301	4	0.143	0.256057	0.158	_	0.236087	0.143088
Q6NZI2	Caveolae-associated protein 1 (Cavin-1) (Polymerase I and transcript release factor)	psself325	1	392	392	_	Homo sapiens	_	33568658	7	43	37	8.8	67.41	[7.1-9.0]; 66.09	4	16.1	[4.0-4.3]; 17.94	_	62.21	3.3	51.31	False	Non-confident transition	None	4	0.299	8.9	-0.005	0.0156188	0.304	_	-0.00500159	0.299293
Q6NZI2	Caveolae-associated protein 1 (Cavin-1) (Polymerase I and transcript release factor)	psself325	1	392	392	_	Homo sapiens	_	33568658	172	201	30	7.6	138.77	[6.5-9.0]; 136.5	4	61.31	[4.0-4.3]; 64.5	_	137.12	3.6	77.46	True	F->U	4.45	4	0.138	7.6	-0.375	-0.367837	0.513	_	-0.374688	0.138369
Q6NZI2	Caveolae-associated protein 1 (Cavin-1) (Polymerase I and transcript release factor)	psself325	1	392	392	_	Homo sapiens	_	33568658	243	290	48	6	168.5	[5.1-6.7]; 166.91	9	122.89	[8.9-9.0]; 124.2	_	161.44	11.8	45.61	False	Unfolded	None	9	-0.215	4	-0.452	-0.36189	0.237	_	-0.399023	-0.215115
Q6NZI2	Caveolae-associated protein 1 (Cavin-1) (Polymerase I and transcript release factor)	psself325	1	392	392	_	Homo sapiens	_	33568658	339	372	34	9	142.69	[7.8-9.0]; 140.06	4	63.29	[4.0-4.4]; 67.02	_	125.31	3.8	79.4	True	F->U	4.65	4	0.136	9	-0.322	-0.2532	0.458	_	-0.322147	0.136193
Q6NZJ6	Eukaryotic translation initiation factor 4 gamma 1 (eIF-4-gamma 1) (eIF-4G 1) (eIF-4G1)	psother306	1	200	200	_	Mus musculus	Neuronal granule	31999954	1	92	92	4	20.71	[4.0-5.5]; 20.46	9	12.16	[8.9-9.0]; 12.38	_	16.8	12.8	8.55	False	Folded	None	9	0.301	4	0.255	0.283631	0.046	_	0.254771	0.301494
Q6NZJ6	Eukaryotic translation initiation factor 4 gamma 1 (eIF-4-gamma 1) (eIF-4G 1) (eIF-4G1)	psother306	1	200	200	_	Mus musculus	Neuronal granule	31999954	172	201	30	6.7	97.25	[6.0-7.4]; 96.71	4	81.58	[4.0-4.2]; 82.13	_	96.93	11.4	15.67	False	Non-confident transition	None	9	0.007	4	-0.05	-0.0477091	0.057	_	-0.0492297	-0.0502903
Q6PH08	ERC protein 2 (CAZ-associated structural protein 1) (CAST1)	psother461	137	664	528	_	Mus musculus	Presynaptic active zone condensate	33202250	316	336	21	8.2	159.28	[6.9-9.0]; 157.59	4	101.38	[4.0-4.4]; 103.91	_	154.73	4.4	57.9	False	Non-confident transition	None	4.4	0.014	8.2	-0.268	-0.250952	0.282	_	-0.268188	-0.0179542
Q6PH08	ERC protein 2 (CAZ-associated structural protein 1) (CAST1)	psother461	137	664	528	_	Mus musculus	Presynaptic active zone condensate	33202250	355	379	25	6.1	120.86	[5.4-6.8]; 120.13	9	99.21	[8.9-9.0]; 99.92	_	117.9	11.4	21.65	False	Unfolded	None	9	-0.014	4	-0.21	-0.0908648	0.196	_	-0.131228	-0.0139719
Q6PH08	ERC protein 2 (CAZ-associated structural protein 1) (CAST1)	psother461	137	664	528	_	Mus musculus	Presynaptic active zone condensate	33202250	566	586	21	8.3	100.76	[7.2-9.0]; 99.9	4	74.67	[4.0-4.3]; 75.9	_	97.71	7	26.09	False	Folded	None	4.5	0.106	8.2	0.05	0.0583791	0.056	_	0.0505103	0.0970589
Q6UVJ0	Spindle assembly abnormal protein 6 homolog (HsSAS-6)	psother291	1	657	657	_	Homo sapiens	Centrosome	31672968	203	230	28	6	91.67	[5.3-6.7]; 90.87	9	69.35	[8.8-9.0]; 70.3	_	87.7	7.9	22.32	False	Folded	None	9	0.147	4	0.002	0.079244	0.145	_	0.0492654	0.147153
Q6UVJ0	Spindle assembly abnormal protein 6 homolog (HsSAS-6)	psother291	1	657	657	_	Homo sapiens	Centrosome	31672968	484	509	26	5.6	69.79	[4.8-6.2]; 69.47	9	60.6	[8.9-9.0]; 60.96	_	67.36	12.5	9.19	False	Folded	None	9	0.135	4	0.071	0.111251	0.064	_	0.0815708	0.135438
Q6UVJ0	Spindle assembly abnormal protein 6 homolog (HsSAS-6)	psother291	1	657	657	_	Homo sapiens	Centrosome	31672968	576	603	28	6.6	72.82	[6.0-7.3]; 72.15	4	54.34	[4.0-4.3]; 55.15	_	72.19	4.6	18.48	False	Folded	None	4.6	0.187	6.6	0.102	0.104593	0.085	_	0.102187	0.161169
Q6UVJ0	Spindle assembly abnormal protein 6 homolog (HsSAS-6)	psother291	1	657	657	_	Homo sapiens	Centrosome	31672968	613	639	27	8.4	80.54	[7.7-8.9]; 80.29	4	73.28	[4.0-4.1]; 73.47	_	79.04	8.8	7.26	False	Folded	None	9	0.128	4	0.061	0.12488	0.067	_	0.126048	0.0612951
Q6ZN16	Mitogen-activated protein kinase kinase kinase 15 (EC 2.7.11.25) (Apoptosis signal-regulating kinase 3) (MAPK/ERK kinase kinase 15) (MEK kinase 15) (MEKK 15)	psself339	1	1313	1313	_	Homo sapiens	_	33649309	1	67	67	8.2	55.84	[6.9-9.0]; 55.13	4	28.52	[4.0-4.4]; 29.48	_	53.65	4	27.32	False	Folded	None	4.2	0.316	8.4	0.161	0.170503	0.155	_	0.16105	0.309323
Q6ZN16	Mitogen-activated protein kinase kinase kinase 15 (EC 2.7.11.25) (Apoptosis signal-regulating kinase 3) (MAPK/ERK kinase kinase 15) (MEK kinase 15) (MEKK 15)	psself339	1	1313	1313	_	Homo sapiens	_	33649309	930	966	37	9	66.83	[7.9-9.0]; 65.13	4	21.46	[4.0-4.4]; 23.58	_	56.41	3.7	45.37	False	Folded	None	4	0.285	9	0.022	0.0651248	0.263	_	0.0223756	0.285032
Q6ZN16	Mitogen-activated protein kinase kinase kinase 15 (EC 2.7.11.25) (Apoptosis signal-regulating kinase 3) (MAPK/ERK kinase kinase 15) (MEK kinase 15) (MEKK 15)	psself339	1	1313	1313	_	Homo sapiens	_	33649309	1143	1180	38	9	93.04	[7.4-9.0]; 91.29	4	40.86	[4.0-4.3]; 42.99	_	85.88	3.7	52.18	True	F->U	5.75	4	0.238	9	-0.122	-0.0892617	0.36	_	-0.121542	0.237533
Q7JVY2	Double parked; isoform A (Double parked; isoform B) (LD35784p) (Replication protein double parked)	psother277	1	743	743	_	Drosophila melanogaster	_	31560342	28	97	70	6.6	72.79	[6.0-7.3]; 72.42	4	60.9	[4.0-4.2]; 61.27	_	72.42	10.1	11.89	False	Folded	None	9	0.131	4	0.086	0.0974786	0.045	_	0.0958496	0.0859876
Q7JVY2	Double parked; isoform A (Double parked; isoform B) (LD35784p) (Replication protein double parked)	psother277	1	743	743	_	Drosophila melanogaster	_	31560342	112	169	58	6.5	90.83	[5.9-7.2]; 90.39	4	78.28	[4.0-4.2]; 78.68	_	90.24	9.4	12.55	False	Folded	None	9	0.125	4	0.065	0.0886392	0.06	_	0.084739	0.0652951
Q7JVY2	Double parked; isoform A (Double parked; isoform B) (LD35784p) (Replication protein double parked)	psother277	1	743	743	_	Drosophila melanogaster	_	31560342	207	233	27	6.2	192.6	[5.5-6.9]; 191.27	9	152.86	[8.9-9.0]; 154.11	_	187.92	10.5	39.74	False	Unfolded	None	9	-0.288	4	-0.456	-0.41166	0.168	_	-0.426288	-0.287585
Q7JVY2	Double parked; isoform A (Double parked; isoform B) (LD35784p) (Replication protein double parked)	psother277	1	743	743	_	Drosophila melanogaster	_	31560342	490	512	23	6.6	40.52	[6.1-7.2]; 40.0	4	22.7	[4.0-4.3]; 23.38	_	39.91	4.4	17.82	False	Folded	None	4.5	0.3	6.6	0.211	0.214107	0.089	_	0.210981	0.274903
Q7JVY2	Double parked; isoform A (Double parked; isoform B) (LD35784p) (Replication protein double parked)	psother277	1	743	743	_	Drosophila melanogaster	_	31560342	532	605	74	6.7	98.42	[6.1-7.4]; 97.69	4	76.52	[4.0-4.4]; 77.31	_	98.08	4.6	21.9	False	Folded	None	4.6	0.12	6.7	0.024	0.0248669	0.096	_	0.0236202	0.0875491
Q7JVY2	Double parked; isoform A (Double parked; isoform B) (LD35784p) (Replication protein double parked)	psother277	1	743	743	_	Drosophila melanogaster	_	31560342	631	652	22	6.8	120.45	[6.2-7.6]; 119.85	4	101.64	[4.0-4.3]; 102.52	_	120.35	10.3	18.81	False	Unfolded	None	9	-0.064	4	-0.126	-0.119762	0.062	_	-0.120886	-0.125692
Q7KTV5	Nopp140; isoform B	psother67	1	686	686	_	Drosophila melanogaster	Nucleolus	28115706	58	678	621	6.3	110.96	[5.6-7.0]; 110.19	9	89.07	[8.9-9.0]; 89.86	_	108.79	7	21.89	False	Non-confident transition	None	9	0.085	4	-0.006	0.0139509	0.091	_	0.00639256	0.0849303
Q7M6Y5	Deuterosome assembly protein 1 (Coiled-coil domain-containing protein 67)	psself342	1	601	601	_	Mus musculus	_	33658185	307	349	43	6.4	144.7	[5.8-7.0]; 143.92	9	119.31	[8.9-9.0]; 120.21	_	142.71	9.8	25.39	False	Unfolded	None	9	-0.066	4	-0.203	-0.154887	0.137	_	-0.166099	-0.0659668
Q7M6Y5	Deuterosome assembly protein 1 (Coiled-coil domain-containing protein 67)	psself342	1	601	601	_	Mus musculus	_	33658185	505	529	25	8.2	58.92	[6.9-9.0]; 57.98	4	30.69	[4.0-4.4]; 32.01	_	56.56	4.5	28.23	False	Folded	None	4.5	0.272	8.3	0.131	0.142974	0.141	_	0.131095	0.254206
Q7Z3E1	Protein mono-ADP-ribosyltransferase TIPARP (EC 2.4.2.-) (ADP-ribosyltransferase diphtheria toxin-like 14) (ARTD14) (Poly [ADP-ribose] polymerase 7) (PARP-7) (TCDD-inducible poly [ADP-ribose] polymerase)	psother567	1	657	657	_	Homo sapiens	Nuclear body	33667379;32482854	1	29	29	9	58.86	[7.8-9.0]; 56.34	4	-7.44	[4.0-4.4]; -4.49	_	44.8	3.3	66.3	False	Folded	None	4	0.36	9	0.004	0.0563349	0.356	_	0.00384046	0.360347
Q7Z3E1	Protein mono-ADP-ribosyltransferase TIPARP (EC 2.4.2.-) (ADP-ribosyltransferase diphtheria toxin-like 14) (ARTD14) (Poly [ADP-ribose] polymerase 7) (PARP-7) (TCDD-inducible poly [ADP-ribose] polymerase)	psother567	1	657	657	_	Homo sapiens	Nuclear body	33667379;32482854	70	153	84	8.5	74.83	[7.1-9.0]; 73.8	4	39.84	[4.0-4.4]; 40.93	_	70.86	4.3	34.99	False	Folded	None	4.3	0.266	8.5	0.066	0.0827813	0.2	_	0.0664914	0.254668
Q7Z417	Nuclear fragile X mental retardation-interacting protein 2 (82 kDa FMRP-interacting protein) (82-FIP) (Cell proliferation-inducing gene 1 protein) (FMRP-interacting protein 2)	psother346	1	695	695	_	Homo sapiens	Stress granule	32302565;32302570	1	144	144	4.8	124.07	[4.0-5.6]; 123.43	9	85.31	[8.5-9.0]; 87.17	_	101.03	9.2	38.76	True	U->F	6.75	9	0.086	4	-0.235	0.0172791	0.321	_	-0.204327	0.0861028
Q7Z417	Nuclear fragile X mental retardation-interacting protein 2 (82 kDa FMRP-interacting protein) (82-FIP) (Cell proliferation-inducing gene 1 protein) (FMRP-interacting protein 2)	psother346	1	695	695	_	Homo sapiens	Stress granule	32302565;32302570	146	332	187	6	99.52	[5.3-6.7]; 98.75	9	76.5	[8.9-9.0]; 77.19	_	95.96	9.7	23.02	False	Non-confident transition	None	9	0.083	4	-0.013	0.0101022	0.096	_	-0.00395476	0.082641
Q7Z417	Nuclear fragile X mental retardation-interacting protein 2 (82 kDa FMRP-interacting protein) (82-FIP) (Cell proliferation-inducing gene 1 protein) (FMRP-interacting protein 2)	psother346	1	695	695	_	Homo sapiens	Stress granule	32302565;32302570	367	403	37	6.3	84.66	[5.5-6.9]; 84.45	9	78.53	[8.9-9.0]; 78.72	_	84.02	11.4	6.13	False	Folded	None	9	0.079	4	0.058	0.0621609	0.021	_	0.0610713	0.0791793
Q7Z417	Nuclear fragile X mental retardation-interacting protein 2 (82 kDa FMRP-interacting protein) (82-FIP) (Cell proliferation-inducing gene 1 protein) (FMRP-interacting protein 2)	psother346	1	695	695	_	Homo sapiens	Stress granule	32302565;32302570	420	443	24	9	1.7	[8.3-9.0]; 1.05	4	-13.46	[4.0-4.5]; -12.71	_	-3.72	1.8	15.16	False	Folded	None	4	0.445	9	0.378	0.397578	0.067	_	0.37777	0.445346
Q7Z5Q1	Cytoplasmic polyadenylation element-binding protein 2 (CPE-BP2) (CPE-binding protein 2) (hCPEB-2)	psself10	1	589	589	_	Homo sapiens	_	22579281	34	182	149	4.2	36.21	[4.0-5.5]; 35.88	9	21.56	[8.7-9.0]; 22.25	_	28.14	12.7	14.65	False	Folded	None	9	0.282	4	0.194	0.255536	0.088	_	0.194518	0.282232
Q7Z739	YTH domain-containing family protein 3 (DF3)	psother437	1	585	585	_	Homo sapiens	Stress granule	33007331;32451507	1	54	54	8.6	82.45	[7.4-9.0]; 81.72	4	56.55	[4.0-4.3]; 57.58	_	78.65	4.4	25.9	False	Folded	None	4.1	0.193	8.7	0.042	0.0605478	0.151	_	0.0419978	0.189564
Q7Z739	YTH domain-containing family protein 3 (DF3)	psother437	1	585	585	_	Homo sapiens	Stress granule	33007331;32451507	213	371	159	4.9	30.22	[4.0-6.0]; 29.92	9	13.78	[8.8-9.0]; 14.43	_	24.45	12.5	16.44	False	Folded	None	9	0.315	4	0.238	0.272285	0.077	_	0.241554	0.314755
Q7Z739	YTH domain-containing family protein 3 (DF3)	psother437	1	585	585	_	Homo sapiens	Stress granule	33007331;32451507	518	538	21	8.2	132.43	[7.0-9.0]; 131.29	4	97.86	[4.0-4.3]; 99.18	_	129.12	5.7	34.57	False	Non-confident transition	None	4.9	0.008	8.3	-0.107	-0.0907469	0.115	_	-0.106964	-0.0238572
Q7ZXV8	BUB3-interacting and GLEBS motif-containing protein ZNF207 (BuGZ) (xBuGZ) (Zinc finger protein 207)	psself39	111	187	77	pH 7.7	Xenopus laevis	Spindle apparatus	26388440	111	168	58	9	38.73	[8.3-9.0]; 36.51	4	-13.61	[4.0-4.4]; -11.41	Middle	20.27	1.8	52.34	False	Folded	None	4	0.382	9	0.187	0.24221	0.195	Folded	0.187207	0.381688
Q7ZXV8	BUB3-interacting and GLEBS motif-containing protein ZNF207 (BuGZ) (xBuGZ) (Zinc finger protein 207)	psself39	258	334	77	pH 7.7	Xenopus laevis	Spindle apparatus	26388440	258	335	78	5.1	38.91	[4.0-5.9]; 38.53	9	21.7	[8.7-9.0]; 22.51	Middle	32.03	10.1	17.21	False	Folded	None	9	0.303	4	0.199	0.260025	0.104	Folded	0.208241	0.302807
Q7ZXV8	BUB3-interacting and GLEBS motif-containing protein ZNF207 (BuGZ) (xBuGZ) (Zinc finger protein 207)	psself39	376	452	77	pH 7.7	Xenopus laevis	Spindle apparatus	26388440	376	452	77	4	4	[4.0-5.2]; 3.73	9	-5.43	[8.8-9.0]; -5.08	Middle	-2.11	12.2	9.43	False	Folded	None	9	0.386	4	0.307	0.370339	0.079	Folded	0.307162	0.385635
Q80ZI1	TMF-regulated nuclear protein 1	psself228	1	94	94	_	Mus musculus	Nuclear speckle;Nucleolus	32627867	1	95	95	7.4	29.26	[6.5-8.4]; 28.84	4	17.54	[4.0-4.6]; 17.92	_	29.1	4.8	11.72	False	Folded	None	5	0.331	7.4	0.287	0.287638	0.044	_	0.286897	0.311859
Q80ZI1	TMF-regulated nuclear protein 1	psself228	17	223	207	_	Mus musculus	Nuclear speckle;Nucleolus	32627867	17	96	80	7.3	29.28	[6.5-8.3]; 28.88	4	17.48	[4.0-4.6]; 17.95	_	29.17	4.8	11.8	False	Folded	None	4.9	0.326	7.3	0.282	0.282563	0.044	_	0.282205	0.306172
Q80ZI1	TMF-regulated nuclear protein 1	psself228	141	223	83	_	Mus musculus	Nuclear speckle;Nucleolus	32627867	162	182	21	4	143.04	[4.0-6.1]; 142.07	9	104.2	[8.9-9.0]; 105.44	_	132.75	14.5	38.84	False	Unfolded	None	9	-0.326	4	-0.47	-0.432043	0.144	_	-0.469619	-0.326325
Q80ZI1	TMF-regulated nuclear protein 1	psself228	17	223	207	_	Mus musculus	Nuclear speckle;Nucleolus	32627867	196	223	28	7.9	107.41	[7.1-8.5]; 106.84	4	91.21	[4.0-4.4]; 91.88	_	105.58	12.9	16.2	False	Unfolded	None	4.8	-0.125	7.9	-0.163	-0.155937	0.038	_	-0.162564	-0.134991
Q811U3	ELKS/Rab6-interacting/CAST family member 1 (ERC-1) (CAZ-associated structural protein 2) (CAST2) (Rab6-interacting protein 2)	psother462	141	660	520	_	Rattus norvegicus	Presynaptic active zone condensate	33202250	320	387	68	6.9	129.33	[6.3-7.7]; 128.48	4	104.8	[4.0-4.3]; 105.64	_	129.27	6.6	24.53	False	Unfolded	None	5.9	-0.057	4	-0.125	-0.108088	0.068	_	-0.10689	-0.124648
Q811U3	ELKS/Rab6-interacting/CAST family member 1 (ERC-1) (CAZ-associated structural protein 2) (CAST2) (Rab6-interacting protein 2)	psother462	141	660	520	_	Rattus norvegicus	Presynaptic active zone condensate	33202250	401	432	32	7.2	135.91	[6.4-8.3]; 134.24	4	87.56	[4.0-4.4]; 89.53	_	135.79	4.2	48.35	True	F->U	4.75	4.3	0.083	7.2	-0.213	-0.212228	0.296	_	-0.213434	0.0484074
Q811U3	ELKS/Rab6-interacting/CAST family member 1 (ERC-1) (CAZ-associated structural protein 2) (CAST2) (Rab6-interacting protein 2)	psother462	141	660	520	_	Rattus norvegicus	Presynaptic active zone condensate	33202250	510	536	27	6.4	118.13	[5.8-7.0]; 117.29	4	95.21	[4.0-9.0]; 96.31	_	116.01	5.7	22.92	False	Non-confident transition	None	9	0.014	6.7	-0.045	-0.0432607	0.059	_	-0.0412869	-0.0275885
Q811U3	ELKS/Rab6-interacting/CAST family member 1 (ERC-1) (CAZ-associated structural protein 2) (CAST2) (Rab6-interacting protein 2)	psother462	141	660	520	_	Rattus norvegicus	Presynaptic active zone condensate	33202250	556	593	38	7.1	122.56	[6.3-8.2]; 121.45	4	89.72	[4.0-4.3]; 90.96	_	122.52	4.5	32.84	True	F->U	5.05	4.5	0.058	7	-0.077	-0.0766571	0.135	_	-0.07657	0.0267184
Q811U3	ELKS/Rab6-interacting/CAST family member 1 (ERC-1) (CAZ-associated structural protein 2) (CAST2) (Rab6-interacting protein 2)	psother462	141	660	520	_	Rattus norvegicus	Presynaptic active zone condensate	33202250	598	622	25	8	215.1	[6.8-9.0]; 212.74	4	137.51	[4.0-4.4]; 140.93	_	210.41	4.4	77.59	False	Unfolded	None	4.5	-0.134	8	-0.49	-0.474237	0.356	_	-0.490412	-0.186151
Q811U3	ELKS/Rab6-interacting/CAST family member 1 (ERC-1) (CAZ-associated structural protein 2) (CAST2) (Rab6-interacting protein 2)	psself350	1	581	581	_	Rattus norvegicus	Presynaptic active zone condensate	33761347	1	62	62	5.8	95.13	[4.8-6.7]; 94.72	9	83.46	[8.9-9.0]; 83.92	_	93.46	12.7	11.67	False	Unfolded	None	9	-0.01	4	-0.081	-0.0483941	0.071	_	-0.0633146	-0.00955698
Q811U3	ELKS/Rab6-interacting/CAST family member 1 (ERC-1) (CAZ-associated structural protein 2) (CAST2) (Rab6-interacting protein 2)	psself350	1	581	581	_	Rattus norvegicus	Presynaptic active zone condensate	33761347	67	122	56	8.1	53.77	[7.0-8.8]; 53.42	4	42.76	[4.0-4.3]; 43.14	_	52.78	8.8	11.01	False	Folded	None	9	0.221	4	0.198	0.212344	0.023	_	0.21328	0.198442
Q811U3	ELKS/Rab6-interacting/CAST family member 1 (ERC-1) (CAZ-associated structural protein 2) (CAST2) (Rab6-interacting protein 2)	psself350	1	581	581	_	Rattus norvegicus	Presynaptic active zone condensate	33761347	320	387	68	6.9	129.33	[6.3-7.7]; 128.48	4	104.8	[4.0-4.3]; 105.64	_	129.27	6.6	24.53	False	Unfolded	None	5.9	-0.057	4	-0.125	-0.108088	0.068	_	-0.10689	-0.124648
Q811U3	ELKS/Rab6-interacting/CAST family member 1 (ERC-1) (CAZ-associated structural protein 2) (CAST2) (Rab6-interacting protein 2)	psself350	1	581	581	_	Rattus norvegicus	Presynaptic active zone condensate	33761347	401	432	32	7.2	135.91	[6.4-8.3]; 134.24	4	87.56	[4.0-4.4]; 89.53	_	135.79	4.2	48.35	True	F->U	4.75	4.3	0.083	7.2	-0.213	-0.212228	0.296	_	-0.213434	0.0484074
Q811U3	ELKS/Rab6-interacting/CAST family member 1 (ERC-1) (CAZ-associated structural protein 2) (CAST2) (Rab6-interacting protein 2)	psself350	1	581	581	_	Rattus norvegicus	Presynaptic active zone condensate	33761347	510	534	25	6.3	110.99	[5.8-6.9]; 110.31	9	89.67	[4.0-9.0]; 90.48	_	108.79	5.7	21.32	False	Non-confident transition	None	9	0.055	6.8	-0.002	-0.00044604	0.057	_	0.00439832	0.0546222
Q811U3	ELKS/Rab6-interacting/CAST family member 1 (ERC-1) (CAZ-associated structural protein 2) (CAST2) (Rab6-interacting protein 2)	psself350	1	581	581	_	Rattus norvegicus	Presynaptic active zone condensate	33761347	556	582	27	6.6	143.98	[6.0-7.2]; 143.28	4	121.67	[4.0-4.2]; 122.43	_	143.08	9.6	22.31	False	Unfolded	None	9	-0.078	4	-0.162	-0.150453	0.084	_	-0.154265	-0.161779
Q84TD8	Protein FLX-like 2 (AtFLXL2)	psother393	1	359	359	_	Arabidopsis thaliana	_	32824618;31043738	1	51	51	5	42.47	[4.0-5.7]; 42.08	9	26.81	[8.7-9.0]; 27.55	_	33.99	10.1	15.66	False	Folded	None	9	0.29	4	0.113	0.257553	0.177	_	0.136063	0.289955
Q84TD8	Protein FLX-like 2 (AtFLXL2)	psother393	1	359	359	_	Arabidopsis thaliana	_	32824618;31043738	73	93	21	7.6	82.05	[6.6-8.6]; 81.58	4	66.89	[4.0-4.3]; 67.43	_	81.65	10.5	15.16	False	Folded	None	9	0.135	4	0.068	0.119399	0.067	_	0.121424	0.0680921
Q84TD8	Protein FLX-like 2 (AtFLXL2)	psother393	1	359	359	_	Arabidopsis thaliana	_	32824618;31043738	101	124	24	6.1	110.15	[5.4-6.8]; 109.23	9	82.99	[8.9-9.0]; 83.75	_	106.33	10.3	27.16	True	U->F	8.65	9	0.022	4	-0.166	-0.0756495	0.188	_	-0.10786	0.0217217
Q84TD8	Protein FLX-like 2 (AtFLXL2)	psother393	1	359	359	_	Arabidopsis thaliana	_	32824618;31043738	230	274	45	9	73.24	[7.9-9.0]; 72.33	4	42.36	[4.0-4.4]; 43.7	_	65.88	4.2	30.88	False	Folded	None	4.1	0.246	8.9	0.073	0.102202	0.173	_	0.0731212	0.244563
Q84TD8	Protein FLX-like 2 (AtFLXL2)	psother393	1	359	359	_	Arabidopsis thaliana	_	32824618;31043738	277	297	21	9	-8.6	[4.0-4.0]; -8.6	9	-8.6	[4.0-4.0]; -8.6	_	-8.6	7	0	False	Folded	None	4	0.456	4	0.456	0.455571	0	_	0.455571	0.455571
Q84TD8	Protein FLX-like 2 (AtFLXL2)	psother393	1	359	359	_	Arabidopsis thaliana	_	32824618;31043738	300	359	60	8.1	16.52	[7.5-8.4]; 16.43	4	14.14	[4.0-4.2]; 14.22	_	15.92	10.7	2.38	False	Folded	None	9	0.309	4	0.299	0.305682	0.01	_	0.30324	0.29894
Q86SQ0	Pleckstrin homology-like domain family B member 2 (Protein LL5-beta)	psother265	1	1253	1253	_	Homo sapiens	Receptor cluster	31537859	4	44	41	7.3	99.21	[6.3-8.8]; 98.2	4	68.67	[4.0-4.3]; 69.79	_	98.99	4.3	30.54	True	F->U	5.65	4.2	0.153	8.4	-0.085	-0.0728928	0.238	_	-0.0783969	0.14031
Q86SQ0	Pleckstrin homology-like domain family B member 2 (Protein LL5-beta)	psother265	1	1253	1253	_	Homo sapiens	Receptor cluster	31537859	60	85	26	4	43.43	[4.0-6.0]; 43.09	9	29.38	[8.9-9.0]; 29.76	_	39.3	14.5	14.05	False	Folded	None	9	0.198	4	0.146	0.160725	0.052	_	0.145643	0.198018
Q86SQ0	Pleckstrin homology-like domain family B member 2 (Protein LL5-beta)	psother265	1	1253	1253	_	Homo sapiens	Receptor cluster	31537859	96	118	23	6.7	25.21	[5.9-7.7]; 24.87	4	14.85	[4.0-4.2]; 15.34	_	25.08	7	10.36	False	Folded	None	4.5	0.349	6.6	0.33	0.330882	0.019	_	0.330413	0.343268
[truncated: 386 more rows]

## Sheet: DisProt
DisProt_Reg	DisProt_ID	Start	End	Length	Term	EC	PMID	pH of maximum solubility	Maximum solubility	10% maximum	pH of minimum solubility	Minimum solubility	10% minimum	pI	Difference	Solubility at pH 7	Transition prediction	Folding state	Transition pH	pH of maximum DispH	Maximum DispH	pH of minimum DispH	Minimum DispH	Difference	DipH at pH 7
[truncated: 2,119 more rows]

[truncated: 2 more sheets: psself, psother]
